# Supplementary material for: N,N-Diisopropyl-N-phosphonyl imines lead to efficient asymmetric synthesis of aziridine-2-carboxylic esters
Source: Royal Society of Chemistry journal article supplement (doi:10.1039/c3ob40251g), 2013-01-01

## Supporting Information

### ***N,N*-Diisopropyl-*N*-phosphonyl Imines Lead to Efficient Asymmetric Synthesis of Aziridine-2-Carboxylic Esters**

**Padmanabha V. Kattamuri,<sup>a</sup> Yiwen Xiong,<sup>b</sup> Yi Pan<sup>\*b</sup> and Guigen Li<sup>\*a,c</sup>**

<sup>a</sup> *Department of Chemistry & Biochemistry, Texas Tech University,  
Lubbock, Texas 79409-1061, USA. E-mail: [Guigen.Li@ttu.edu](mailto:Guigen.Li@ttu.edu);*

*Fax: 001-806-742-1289; Tel: 001-806-742-3015*

<sup>b</sup> *School of Chemistry and Chemical Engineering, Nanjing University, Nanjing 210093, P. R. China, E-mail: [yipan@nju.edu.cn](mailto:yipan@nju.edu.cn);*

<sup>c</sup> *Institute of Chemistry & BioMedical Sciences, Nanjing University, Nanjing 210093, P. R. China*

### **Table of Contents**

|                                                                                           |                 |
|-------------------------------------------------------------------------------------------|-----------------|
| <b>I. <sup>1</sup>H, <sup>13</sup>C, <sup>31</sup>P, HRMS and IR spectra of 6c to 6l</b>  | <b>S2-S62</b>   |
| <b>II. <sup>1</sup>H, <sup>13</sup>C, <sup>31</sup>P, HRMS and IR spectra of 6m to 6v</b> | <b>S63-S123</b> |

### Compound 6c

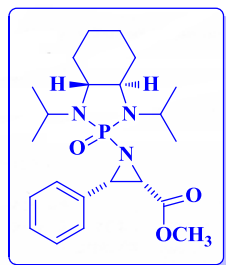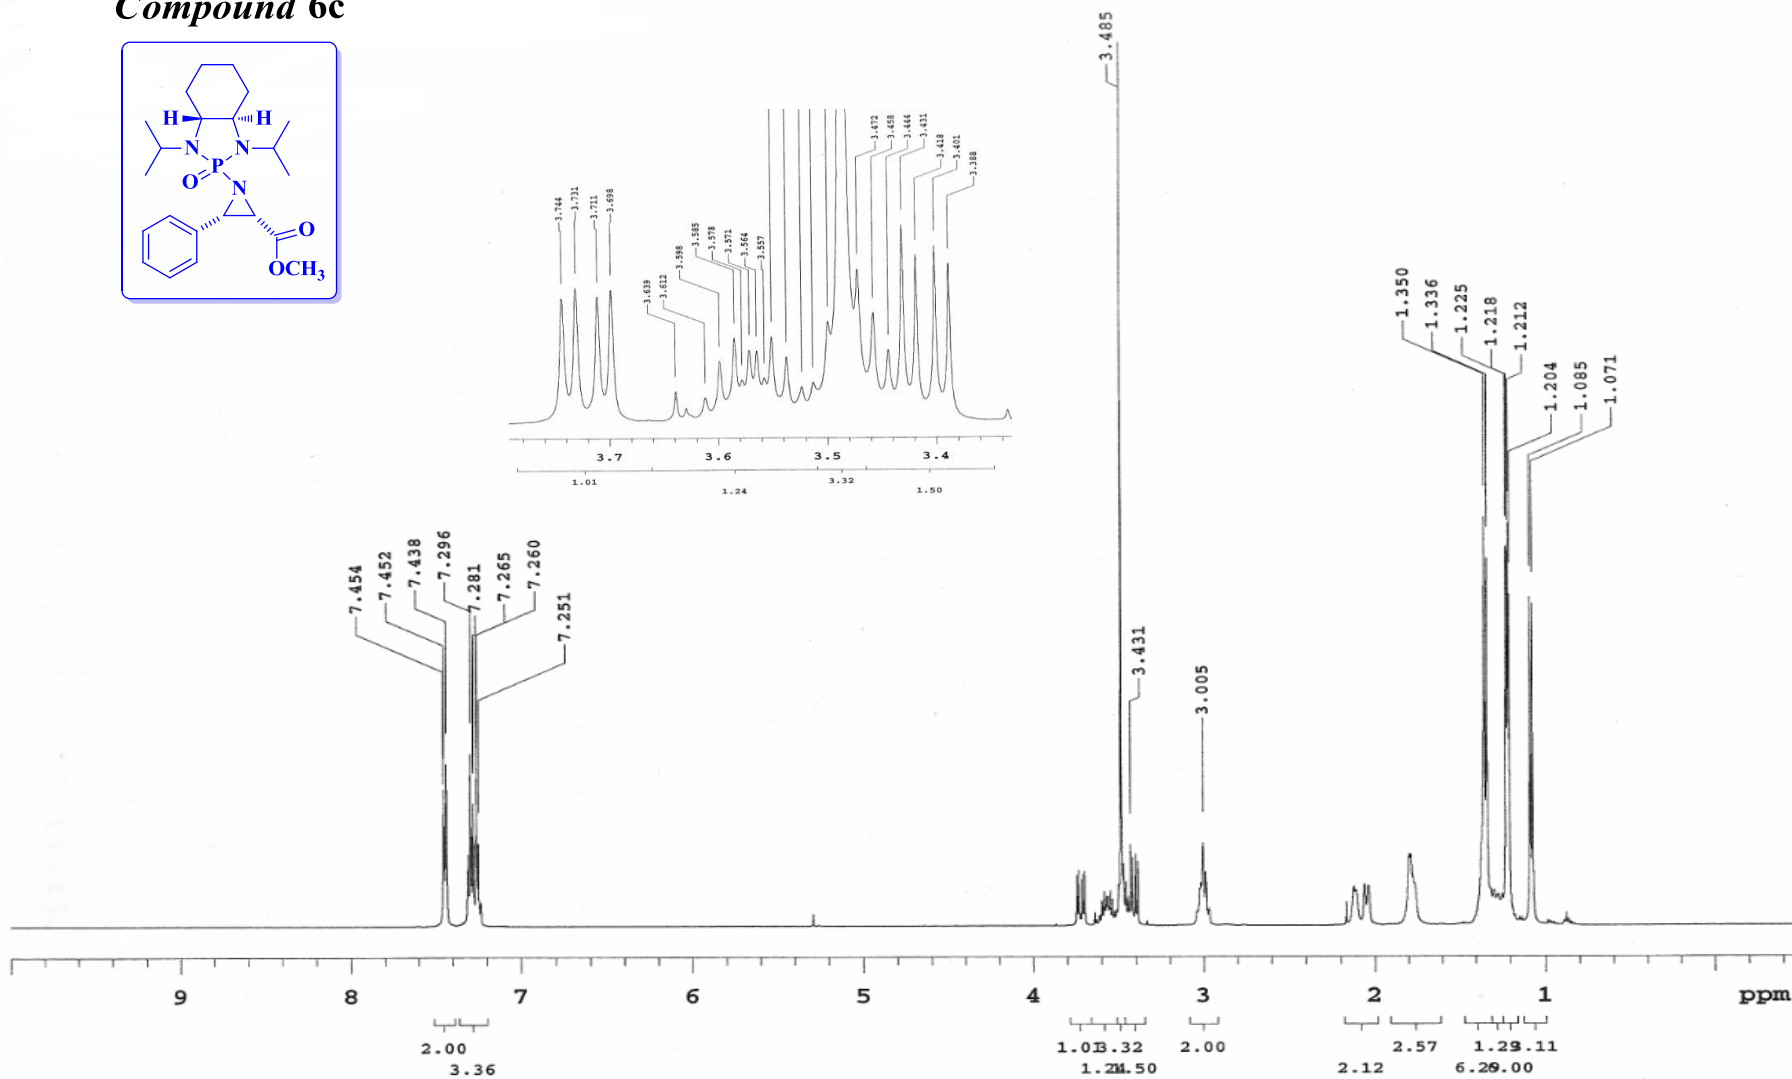

**Compound 6c**

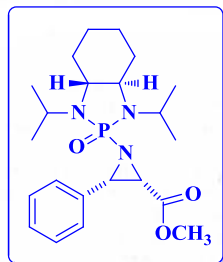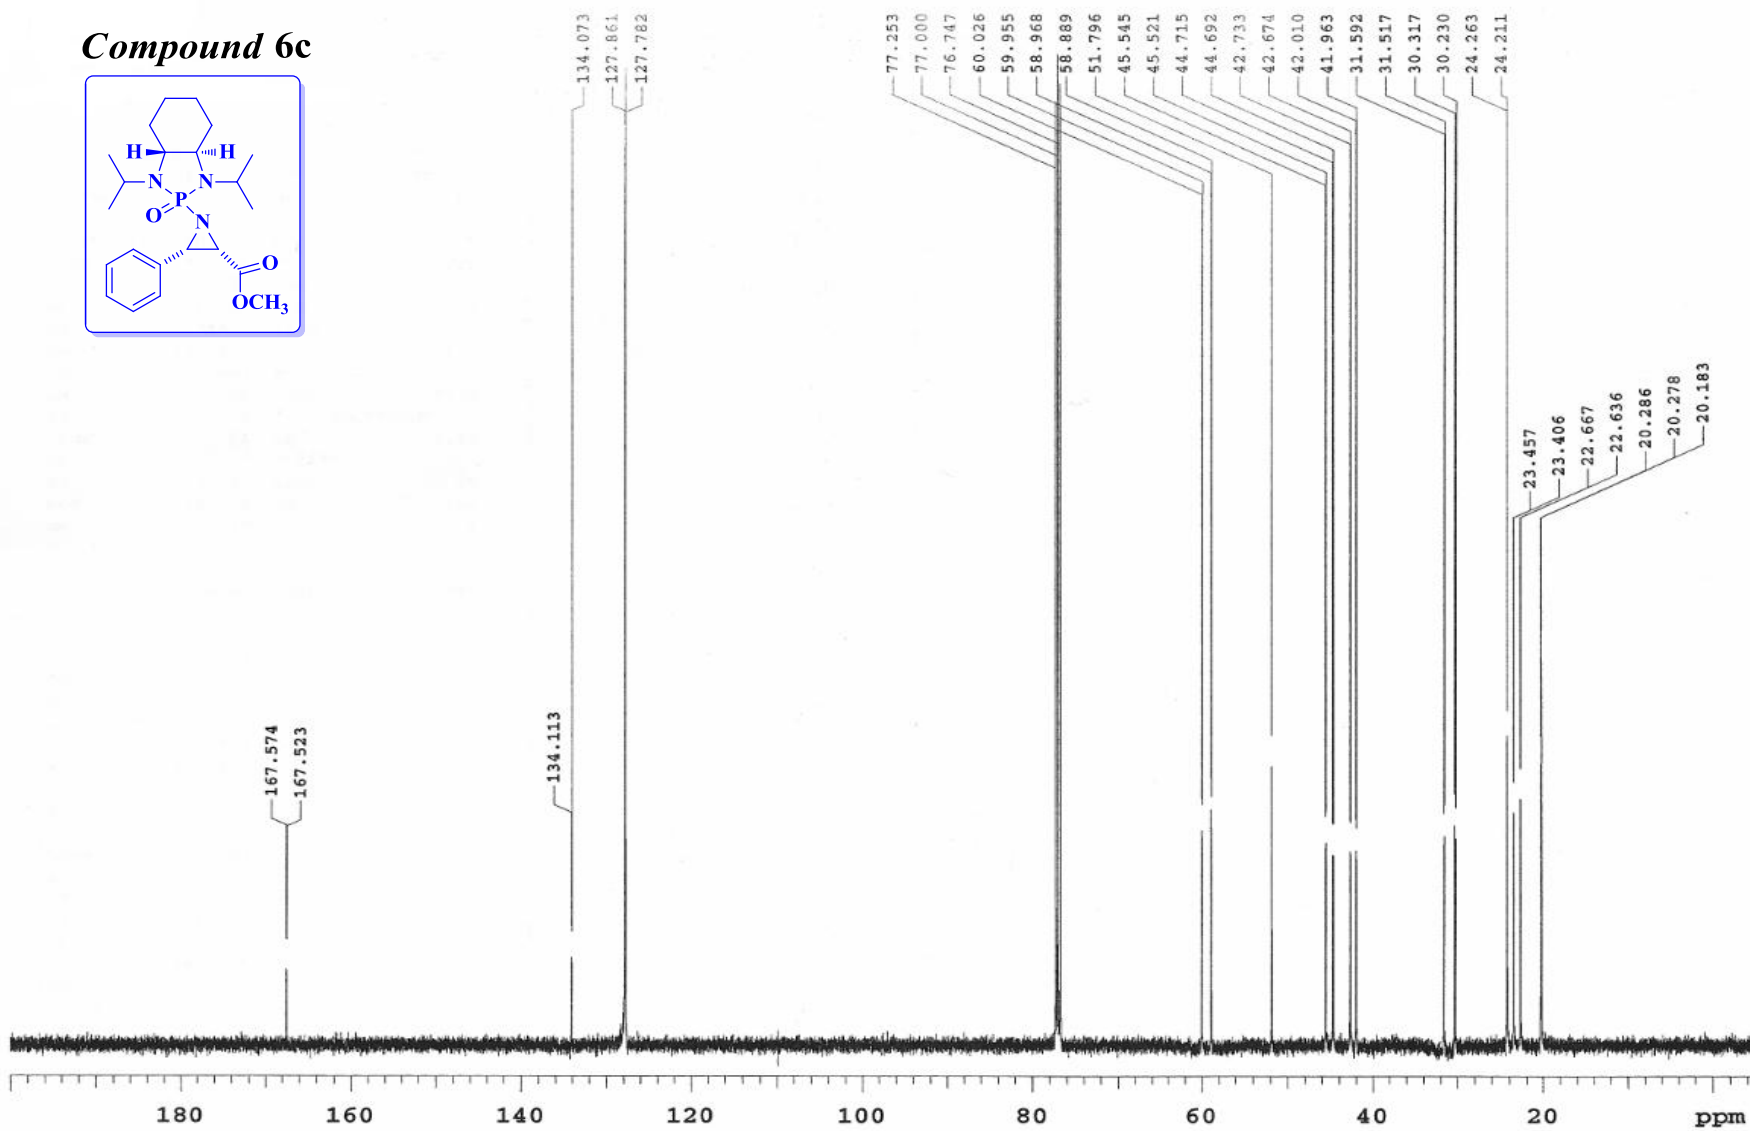

**Compound 6c**

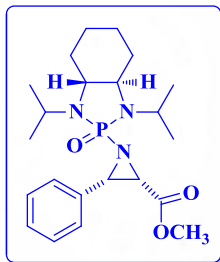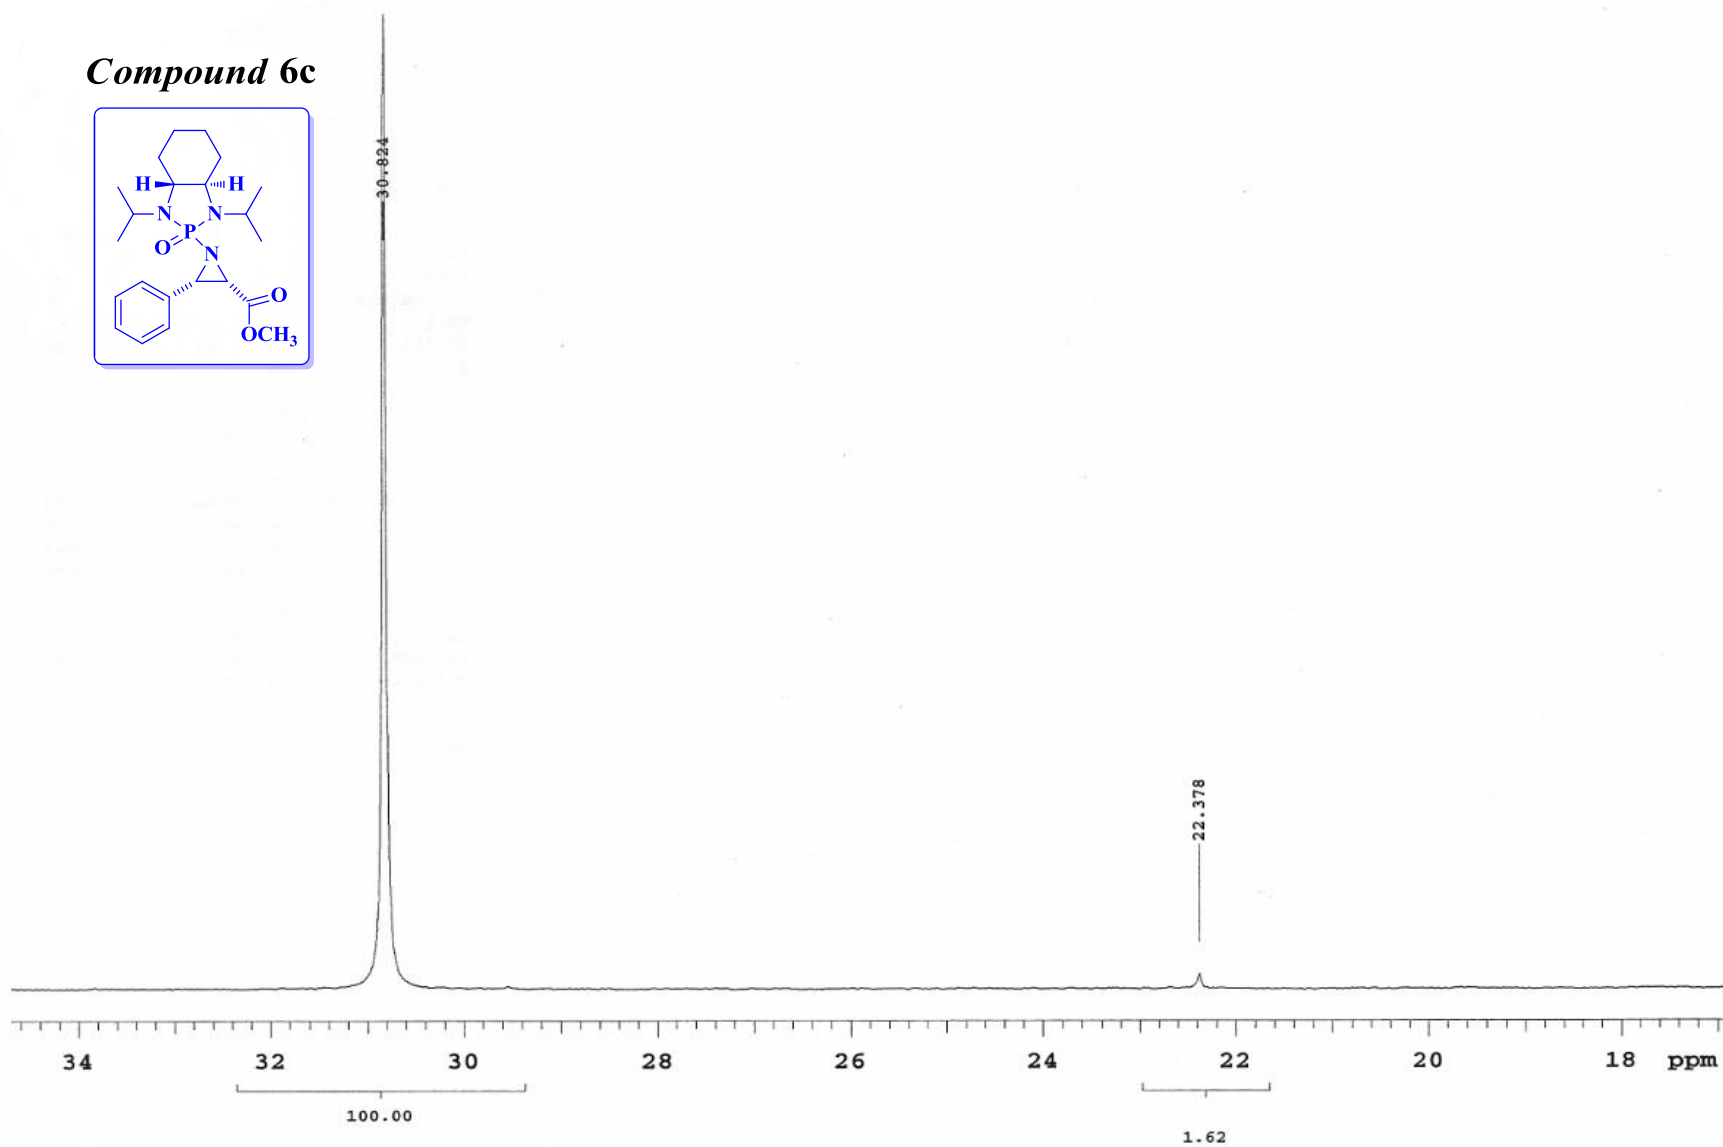

Padmanabha Kattamuri, In-PVK-D-4 University of Illinois, SCS, Mass Spectrometry Lab  
Qtof\_41000 21 (1.507) AM (Cen,5, 80.00, Ar,15000.0,0.00,0.70); Sm (SG, 2x5.00)

Q-tof UE521  
1: TOF MS ES+  
1.07e4

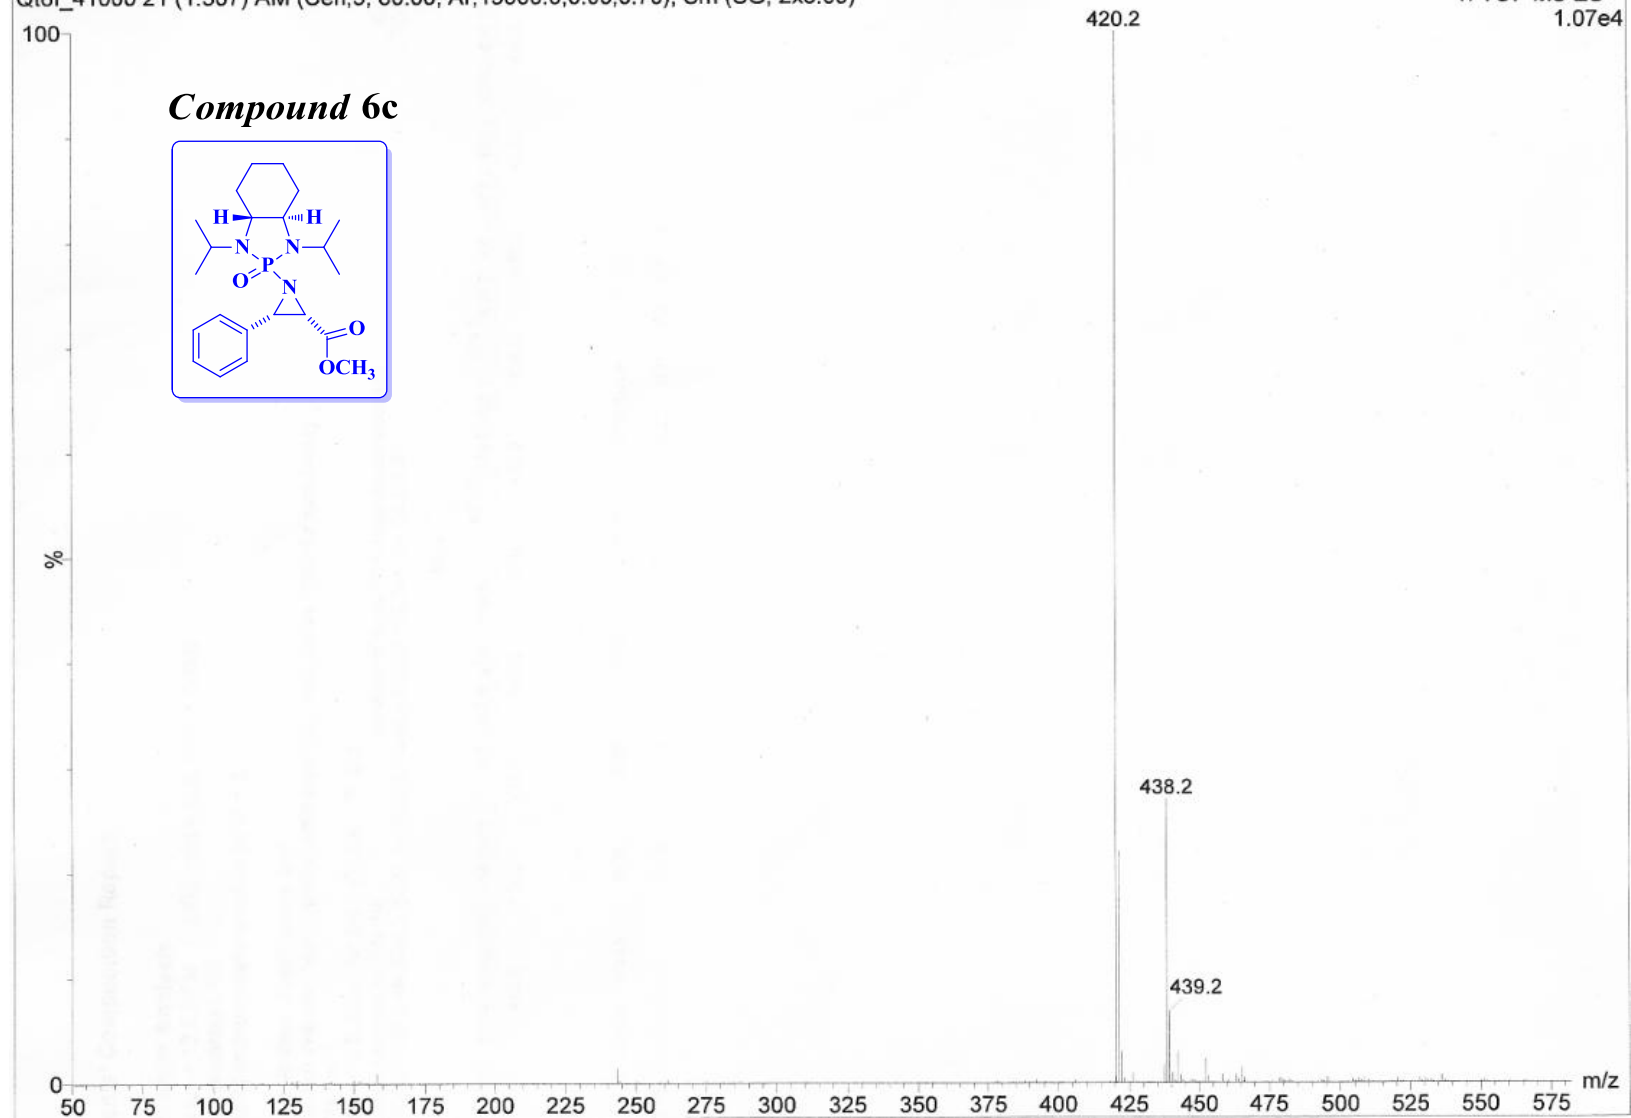

## Elemental Composition Report

Page 1

### Single Mass Analysis

Tolerance = 10.0 PPM / DBE: min = -1.5, max = 600.0

Element prediction: Off

Number of isotope peaks used for i-FIT = 3

Monoisotopic Mass, Even Electron Ions

88 formula(e) evaluated with 1 results within limits (all results (up to 1000) for each mass)

Elements Used:

C: 0-150 H: 0-250 N: 2-4 O: 2-4 P: 0-1

Padmanabha Kattamuri, In-PVK-D-4

University of Illinois, SCS, Mass Spectrometry Lab

Qtof\_41000 29 (2.043) AM (Cen,3, 80.00, Ar,15000.0,716.46,0.70); Sm (SG, 2x5.00); Cm (28:30)

Q-tof UE521

2: TOF MS ES+

1.27e+003

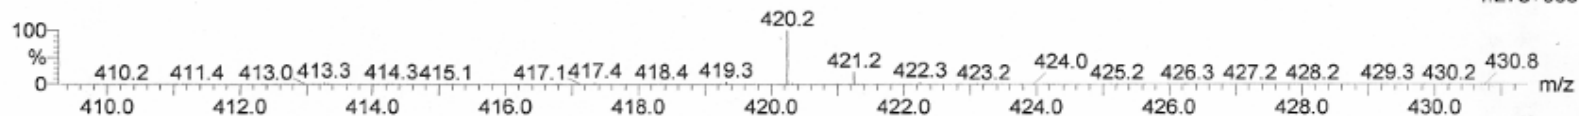

Minimum:

Maximum:

-1.5

5.0

10.0

600.0

Mass

Calc. Mass

mDa

PPM

DBE

i-FIT

Formula

420.2425

420.2416

0.9

2.1

7.5

3.2

C22 H35 N3 O3 P

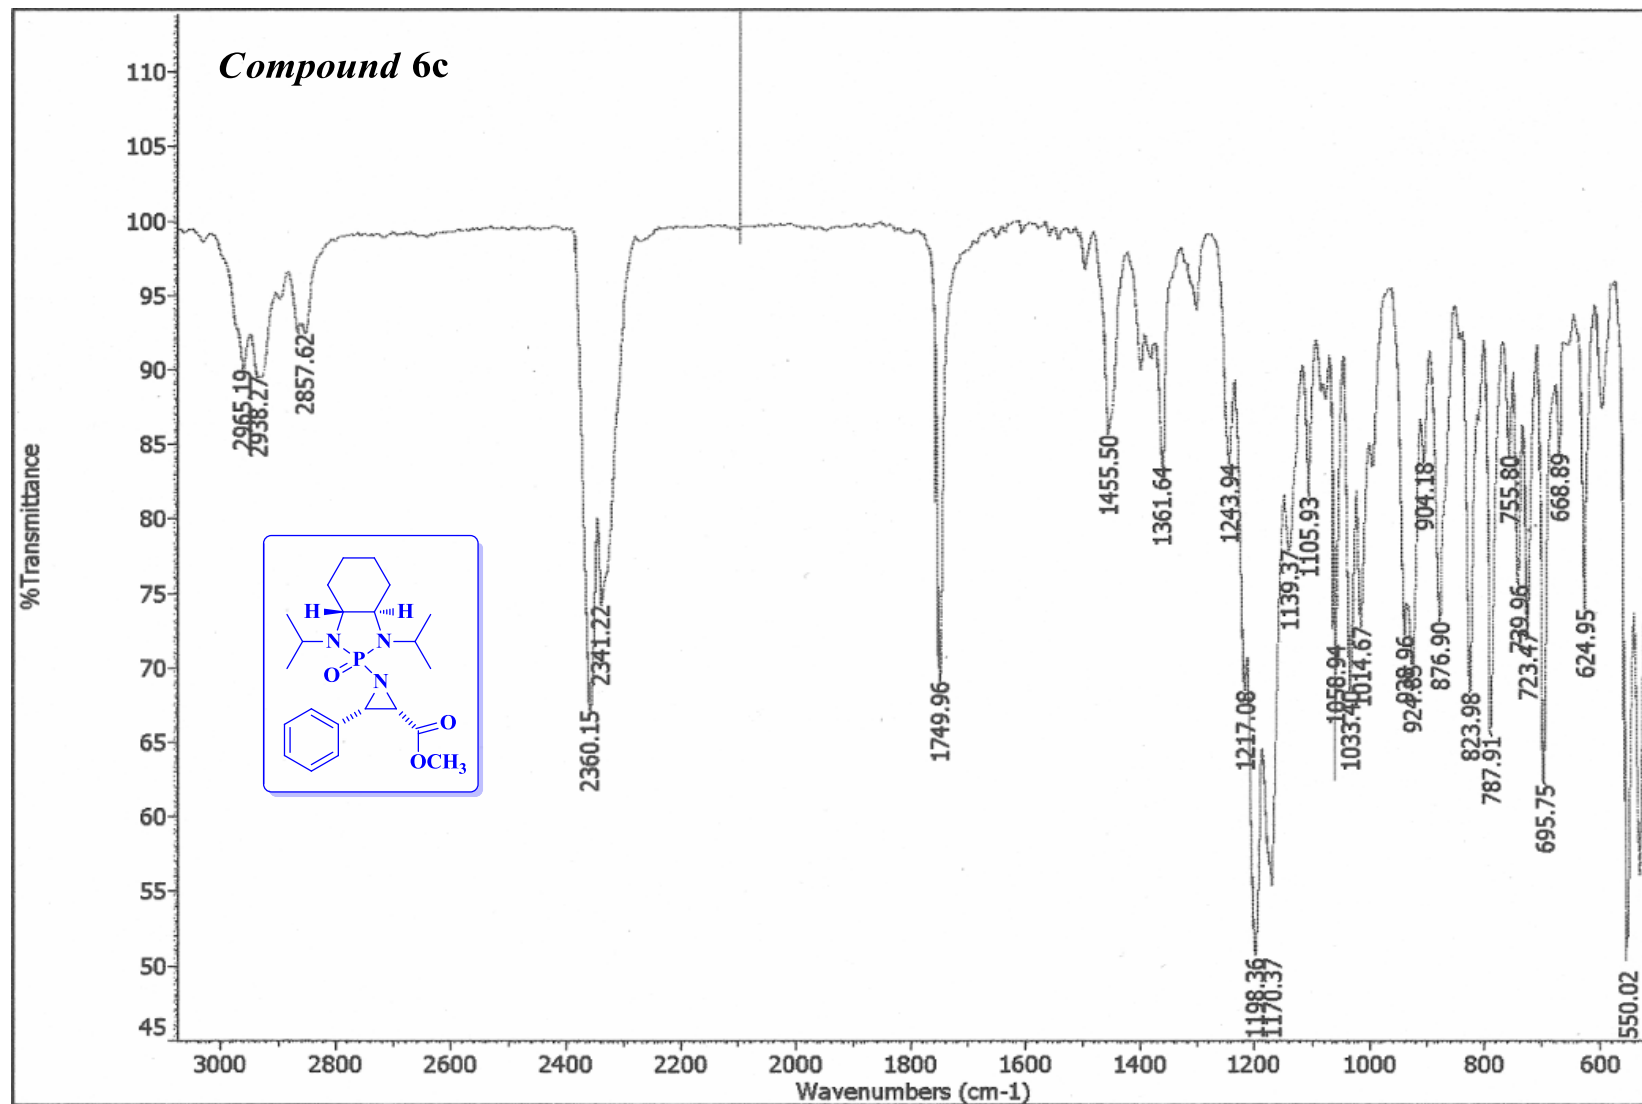

### Compound 6d

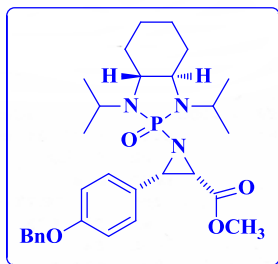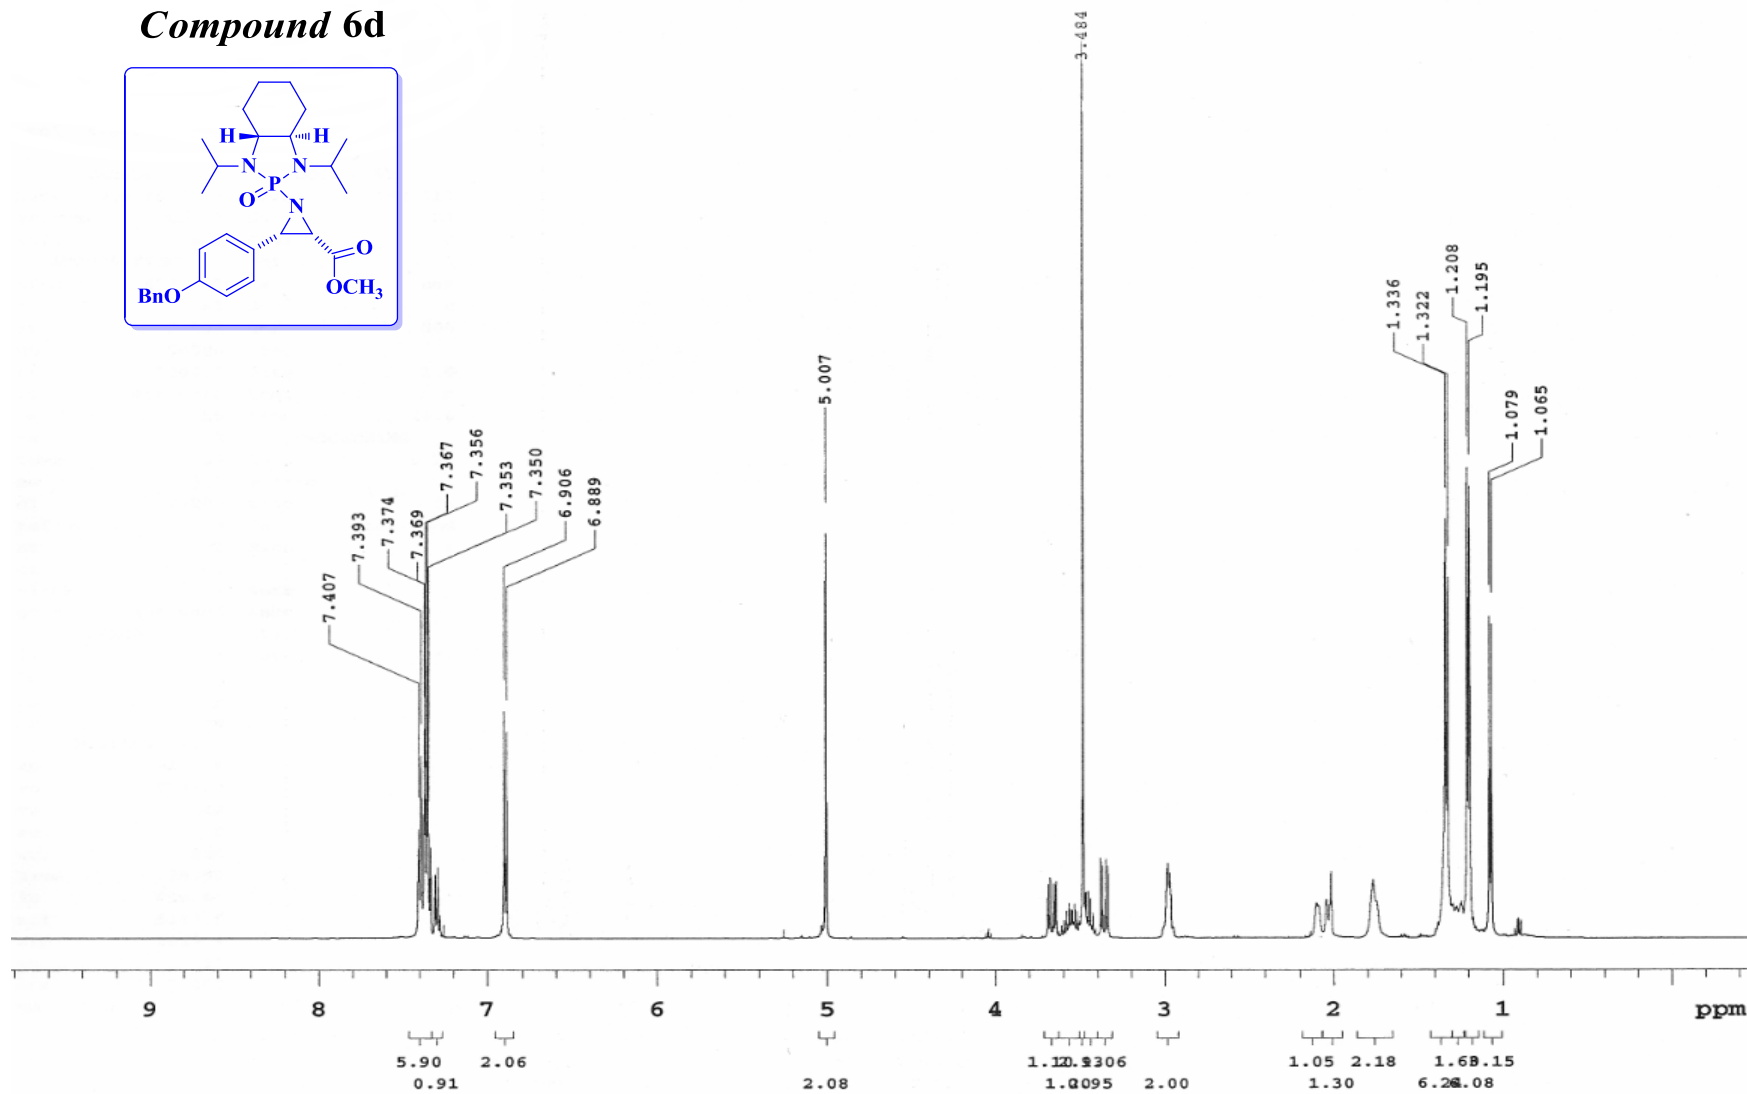



### Compound 6d

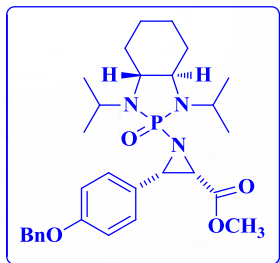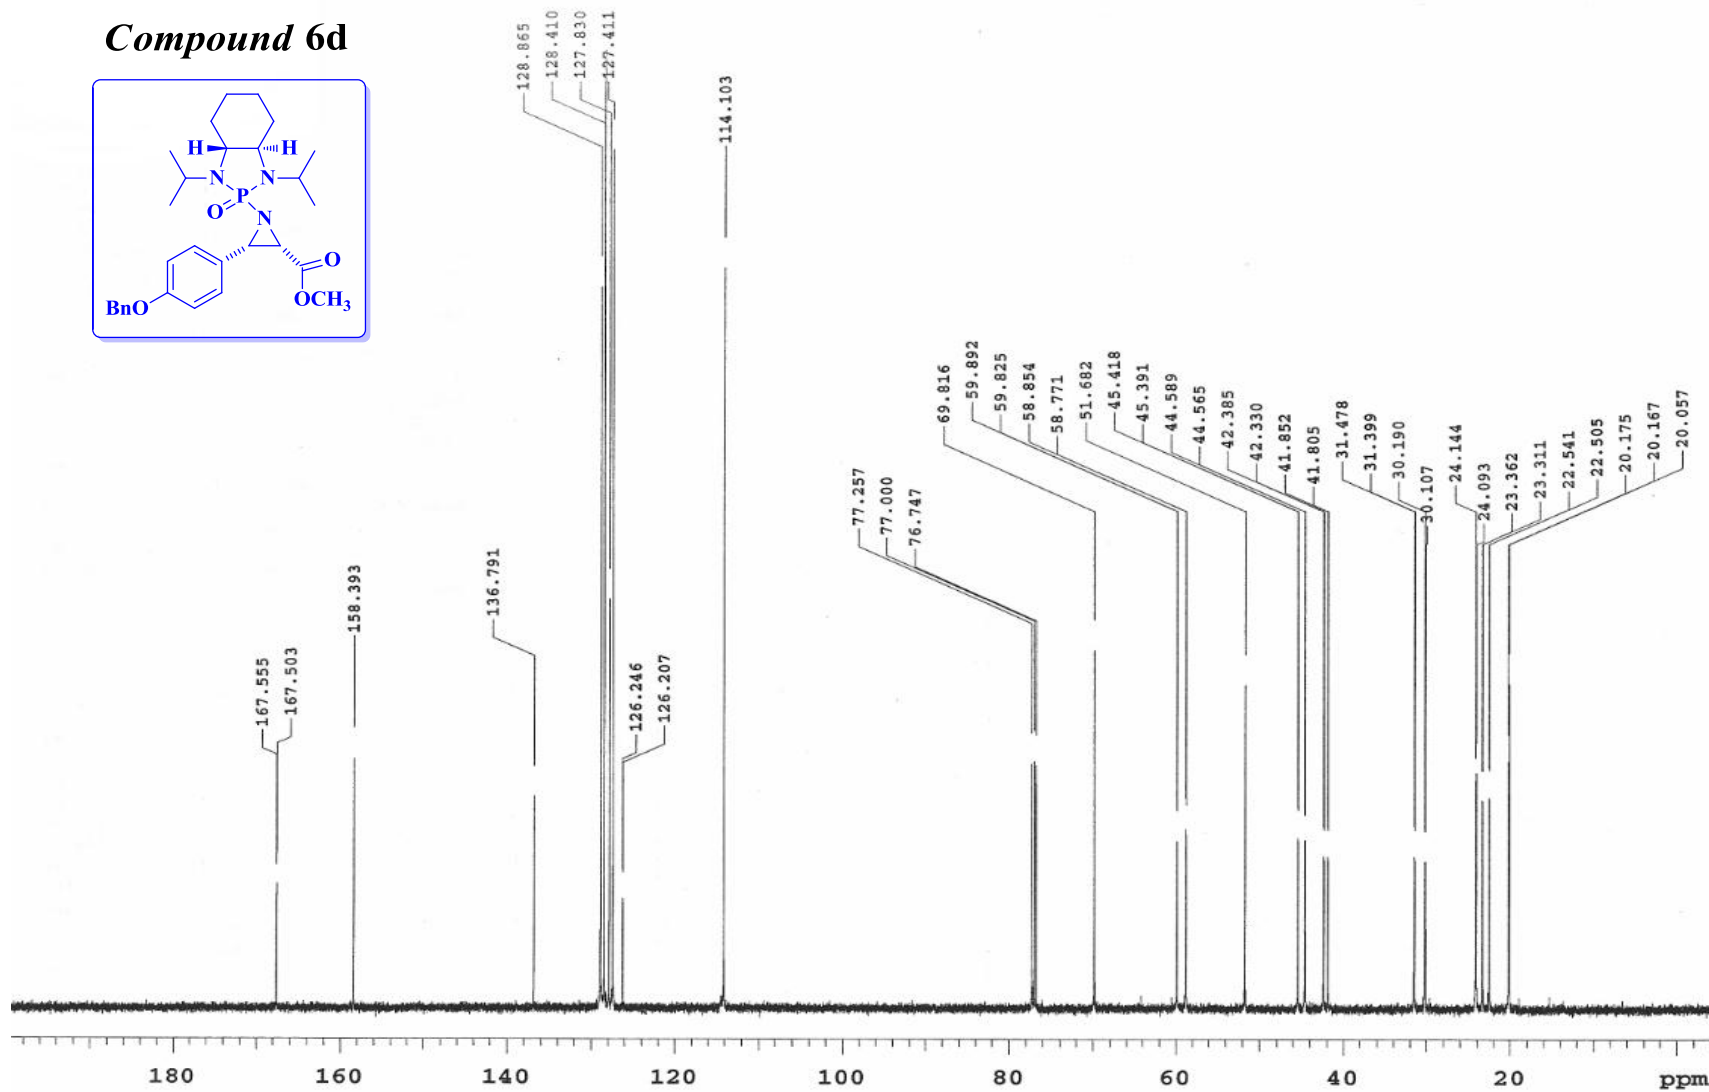

### Compound 6d

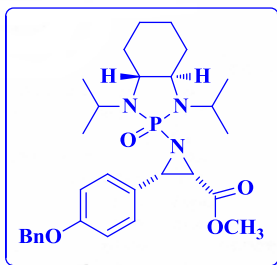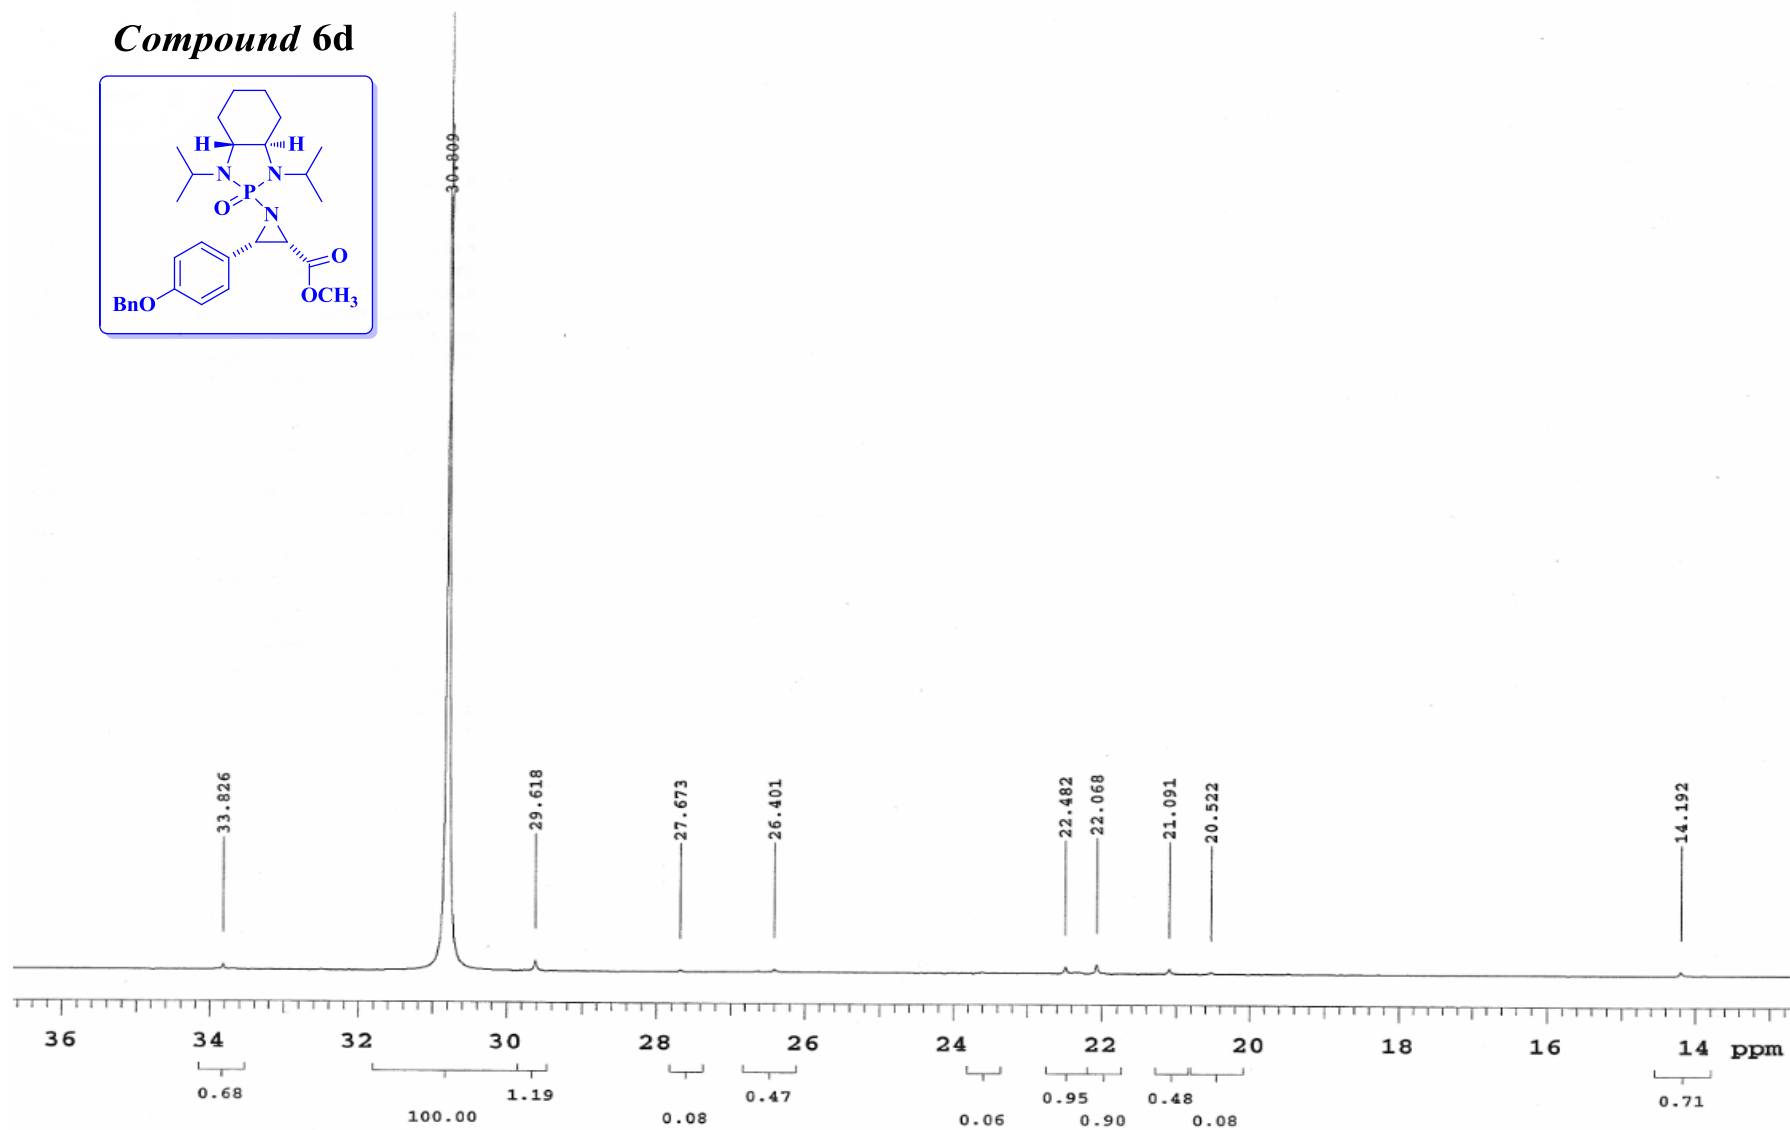

Padmanabha Kattamuri, PVK-D-2

University of Illinois, SCS, Mass Spectrometry Lab

Q-tof UE521

Qtof\_41962 39 (2.793) AM (Cen,5, 80.00, Ar,15000.0,0.00,0.70); Sm (SG, 2x5.00); Cm (39-10x8.000)

1: TOF MS ES+  
1.12e4

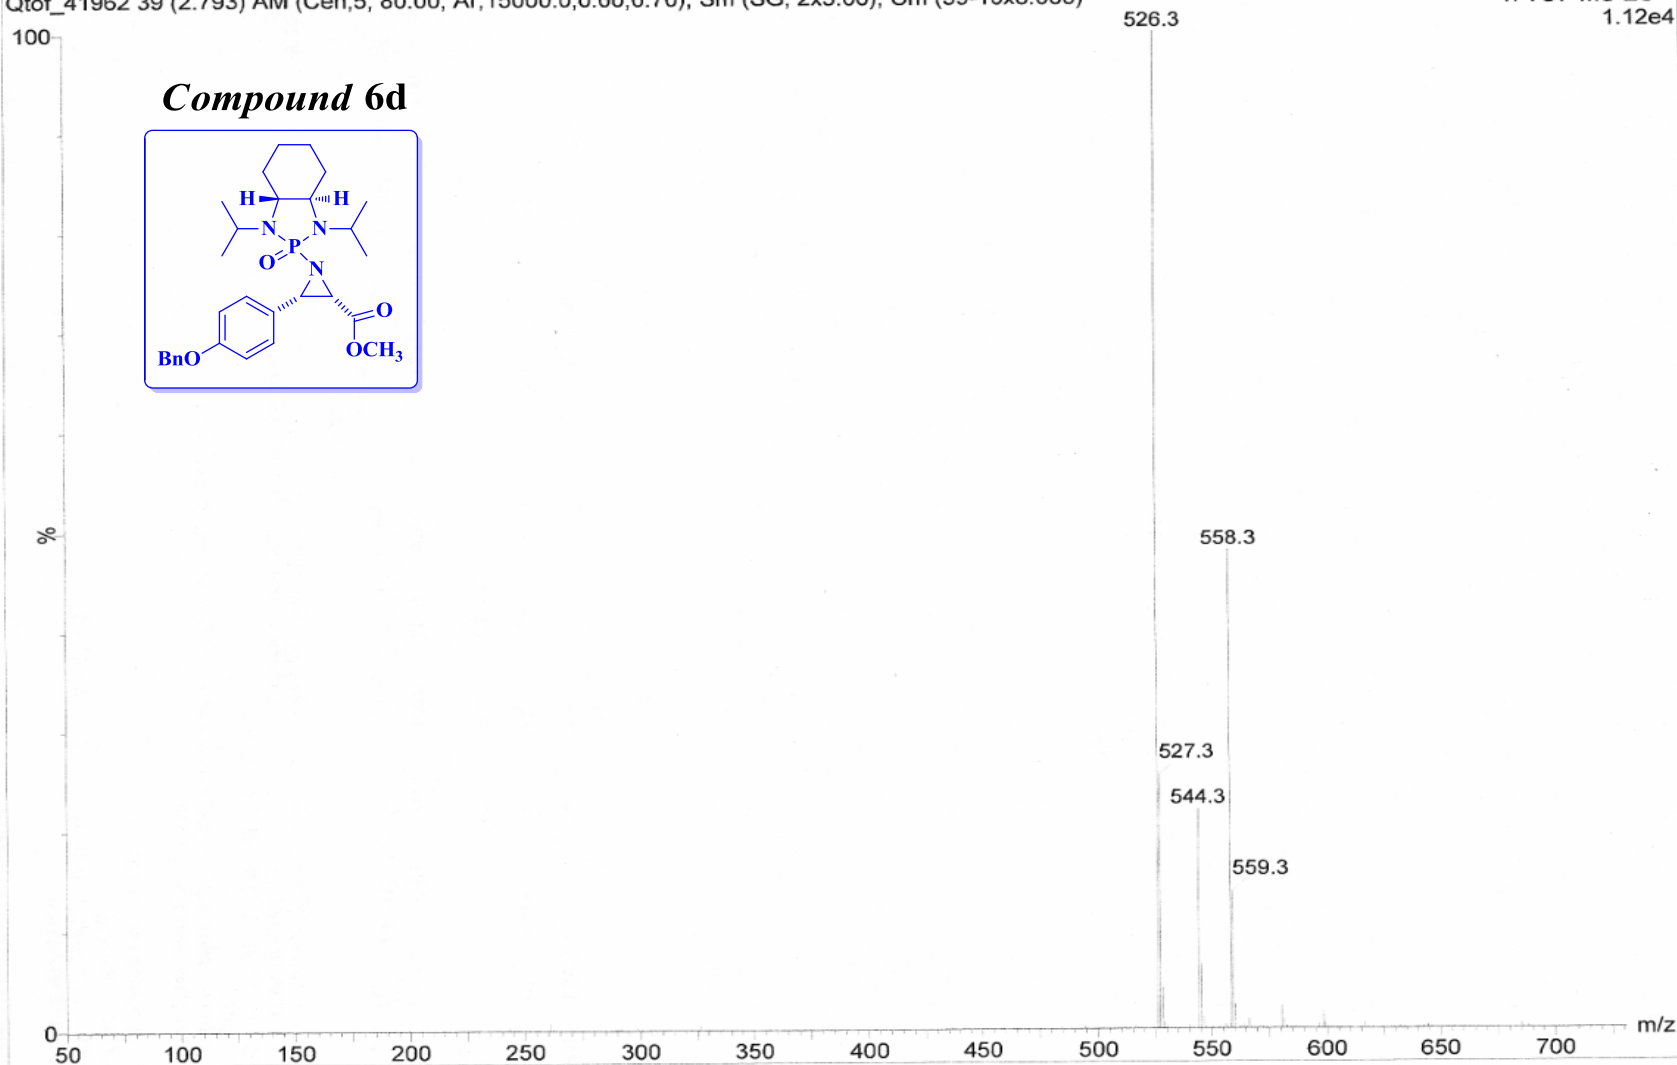

## Elemental Composition Report

Page 1

### Single Mass Analysis

Tolerance = 10.0 PPM / DBE: min = -1.5, max = 600.0

Element prediction: Off

Number of isotope peaks used for i-FIT = 3

Monoisotopic Mass, Even Electron Ions

115 formula(e) evaluated with 1 results within limits (all results (up to 1000) for each mass)

Elements Used:

C: 0-150 H: 0-250 N: 2-4 O: 2-4 P: 0-1

Padmanabha Kattamuri, PVK-D-2

University of Illinois, SCS, Mass Spectrometry Lab

Qtof\_41962 32 (2.257) AM (Cen,3, 80.00, Ar,15000.0,716.46,0.70); Sm (SG, 2x3.00); Cm (31:33)

Q-tof UE521  
2: TOF MS ES+  
4.85e+002

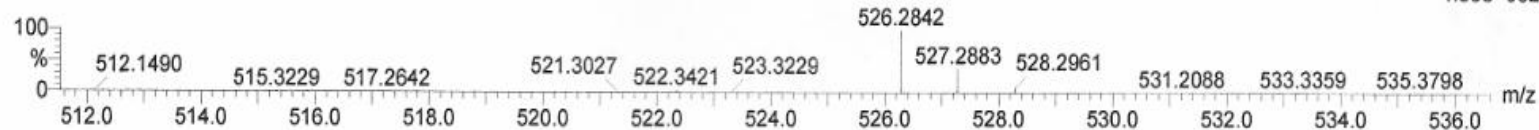

Minimum:

Maximum:

-1.5

5.0

10.0

600.0

| Mass     | Calc. Mass | mDa | PPM | DBE  | i-FIT | Formula         |
|----------|------------|-----|-----|------|-------|-----------------|
| 526.2842 | 526.2835   | 0.7 | 1.3 | 11.5 | 1.2   | C29 H41 N3 O4 P |

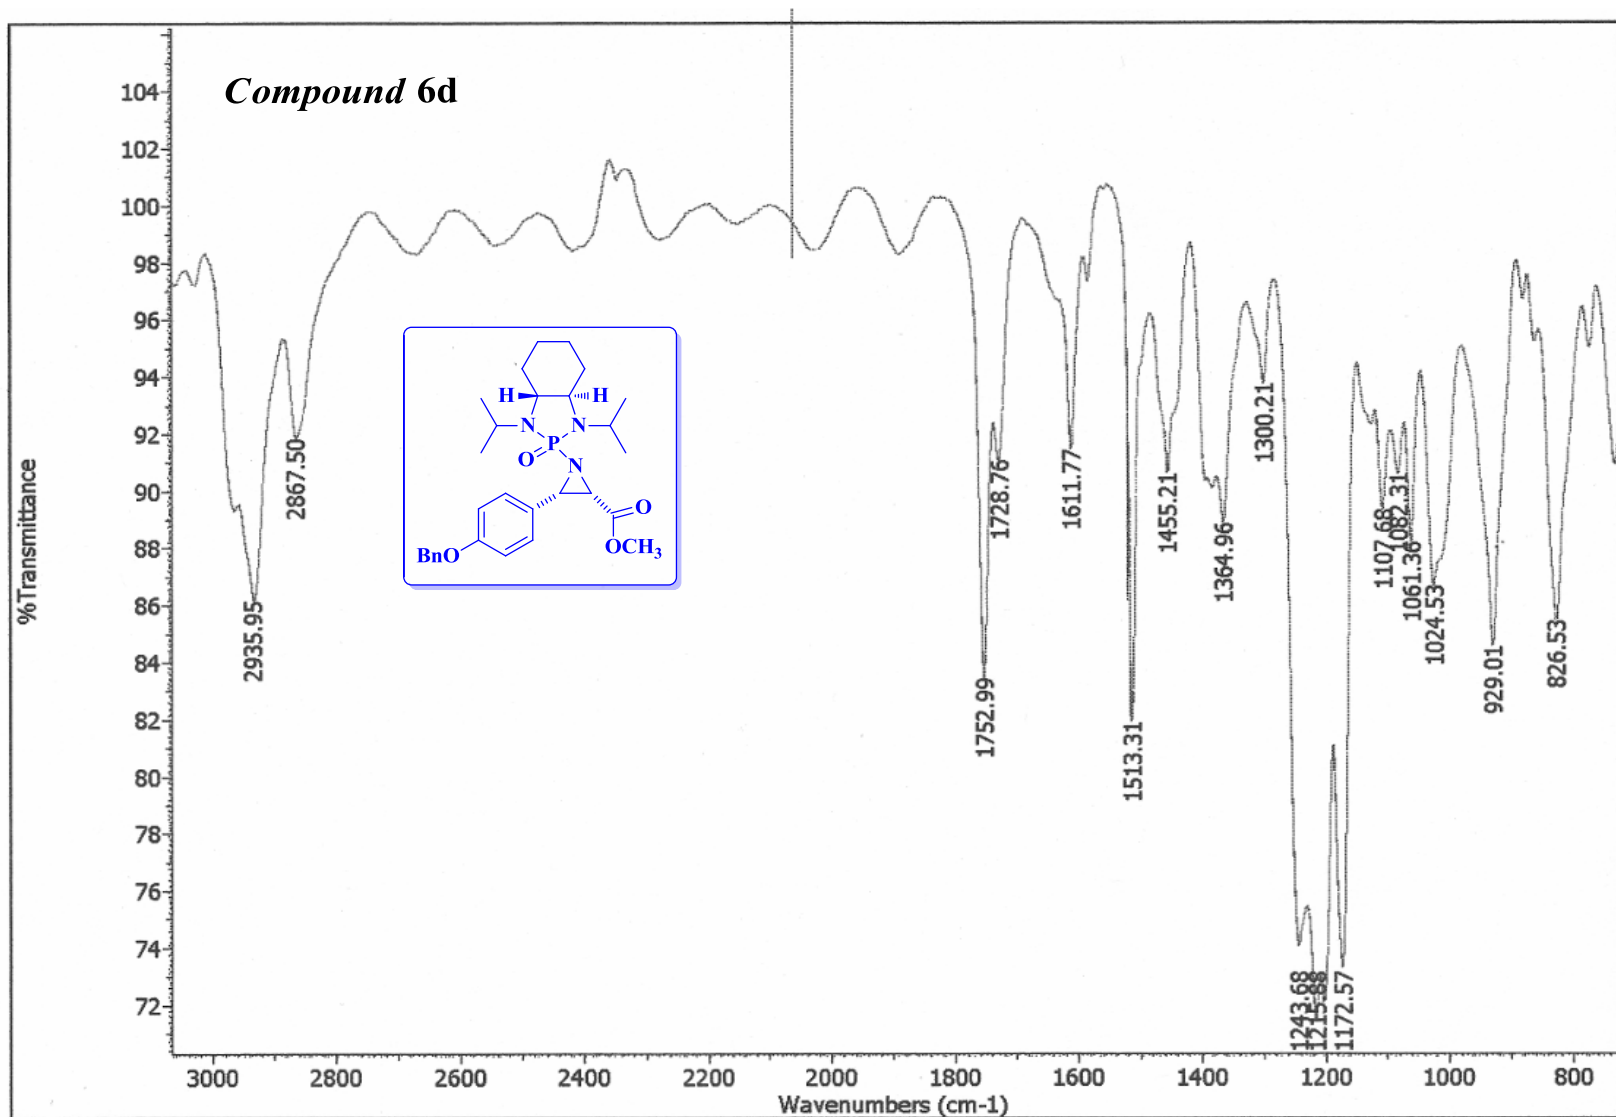

### Compound 6e

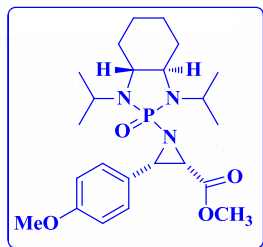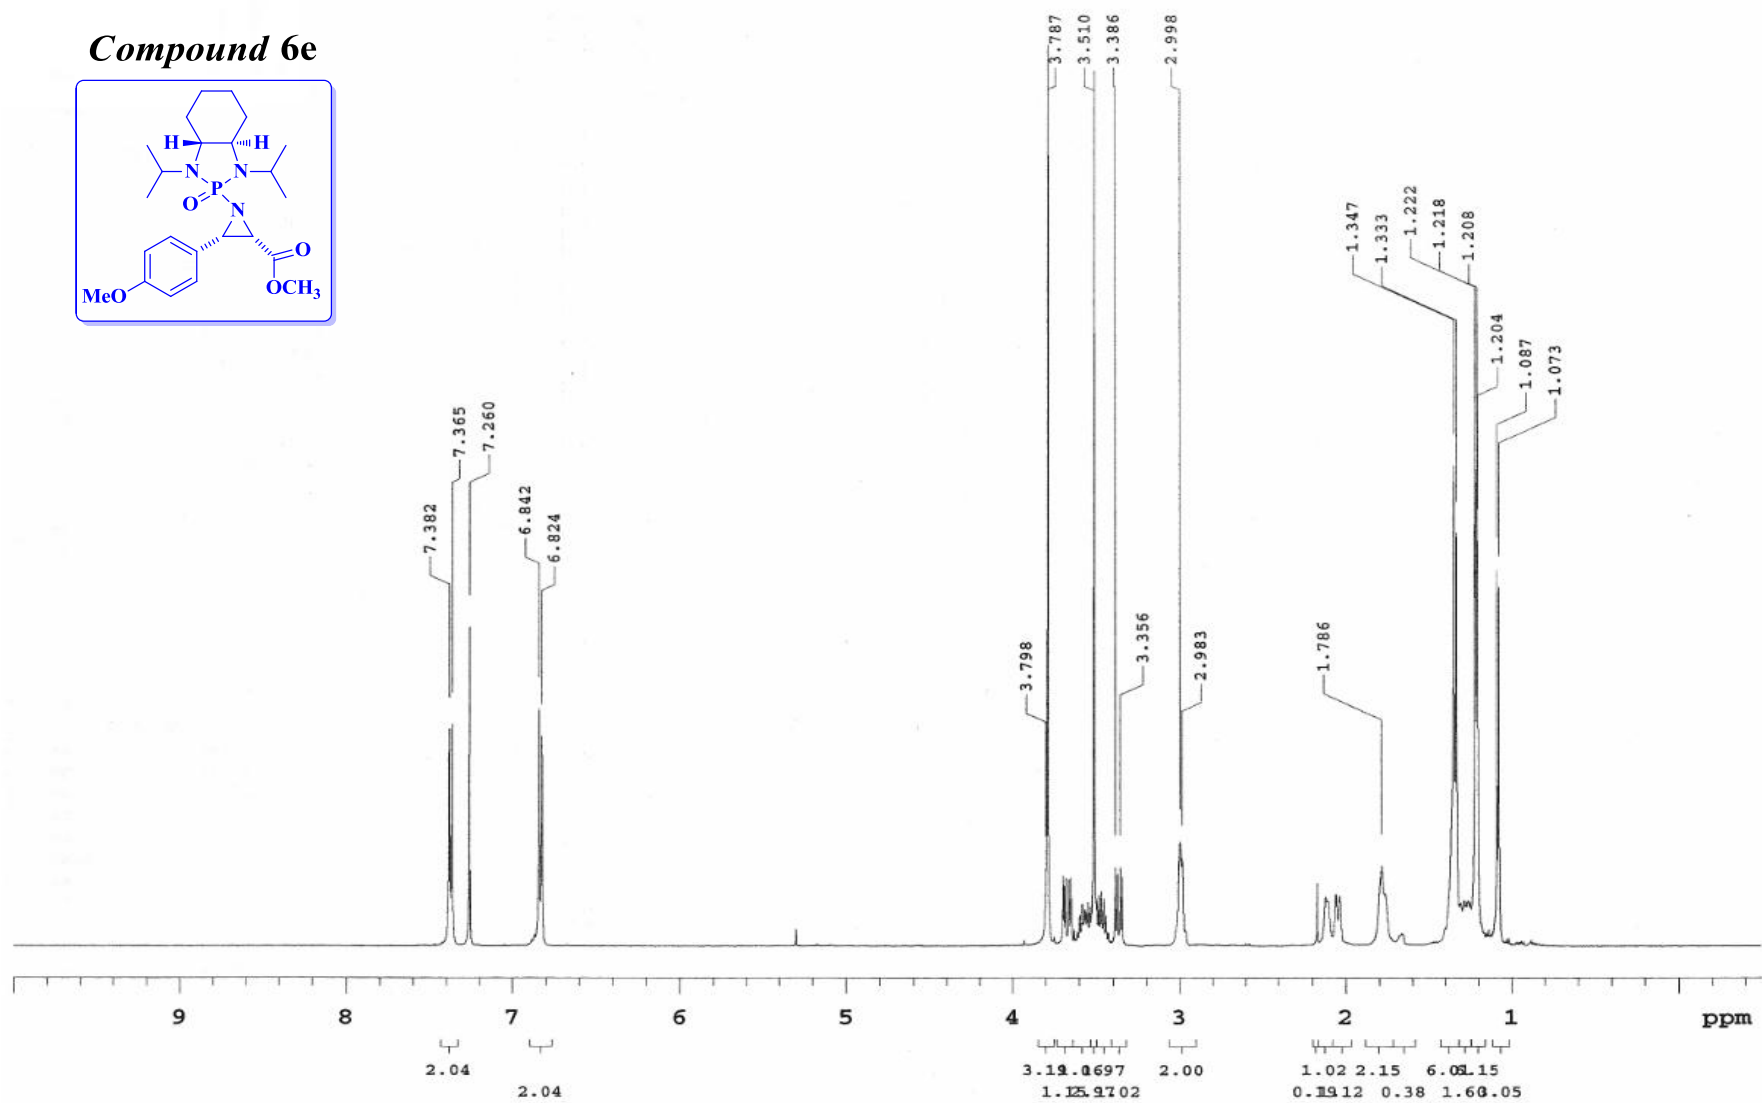

### Compound 6e

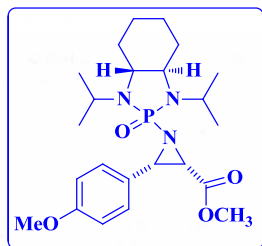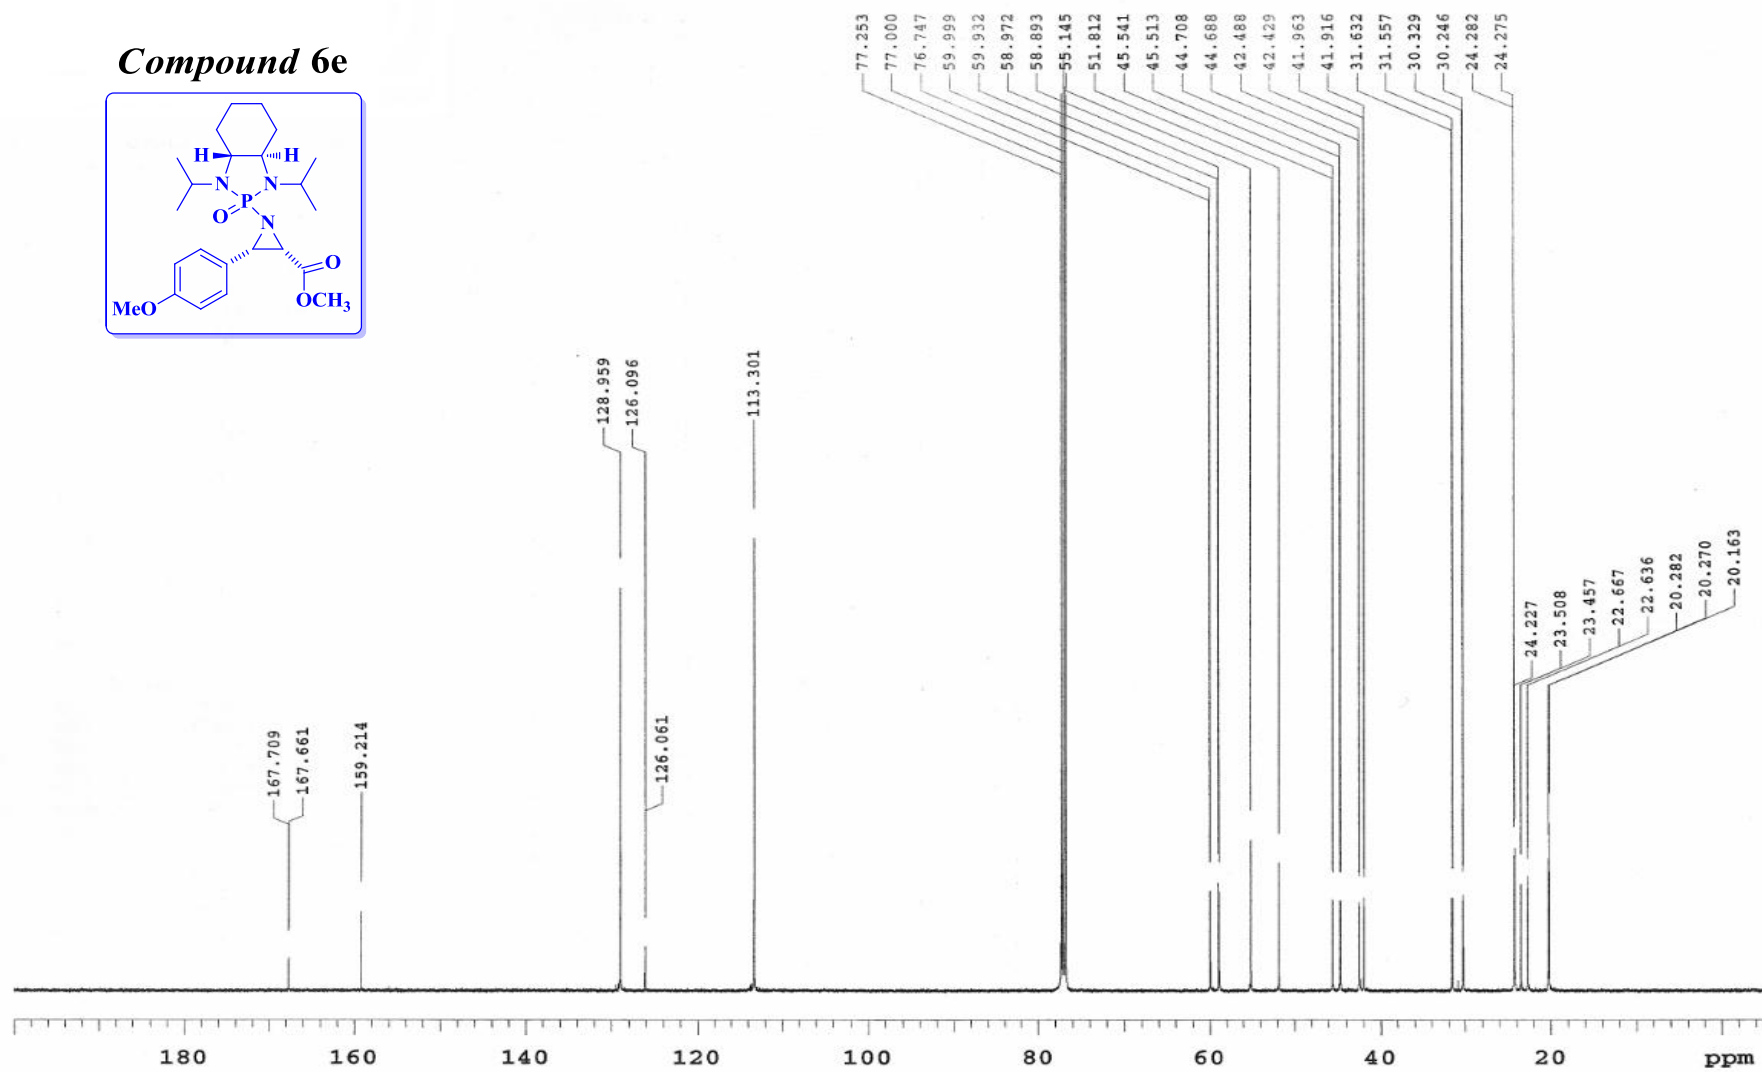

**Compound 6e**

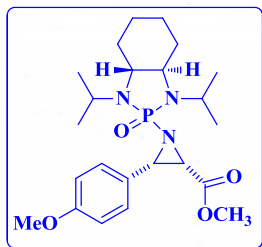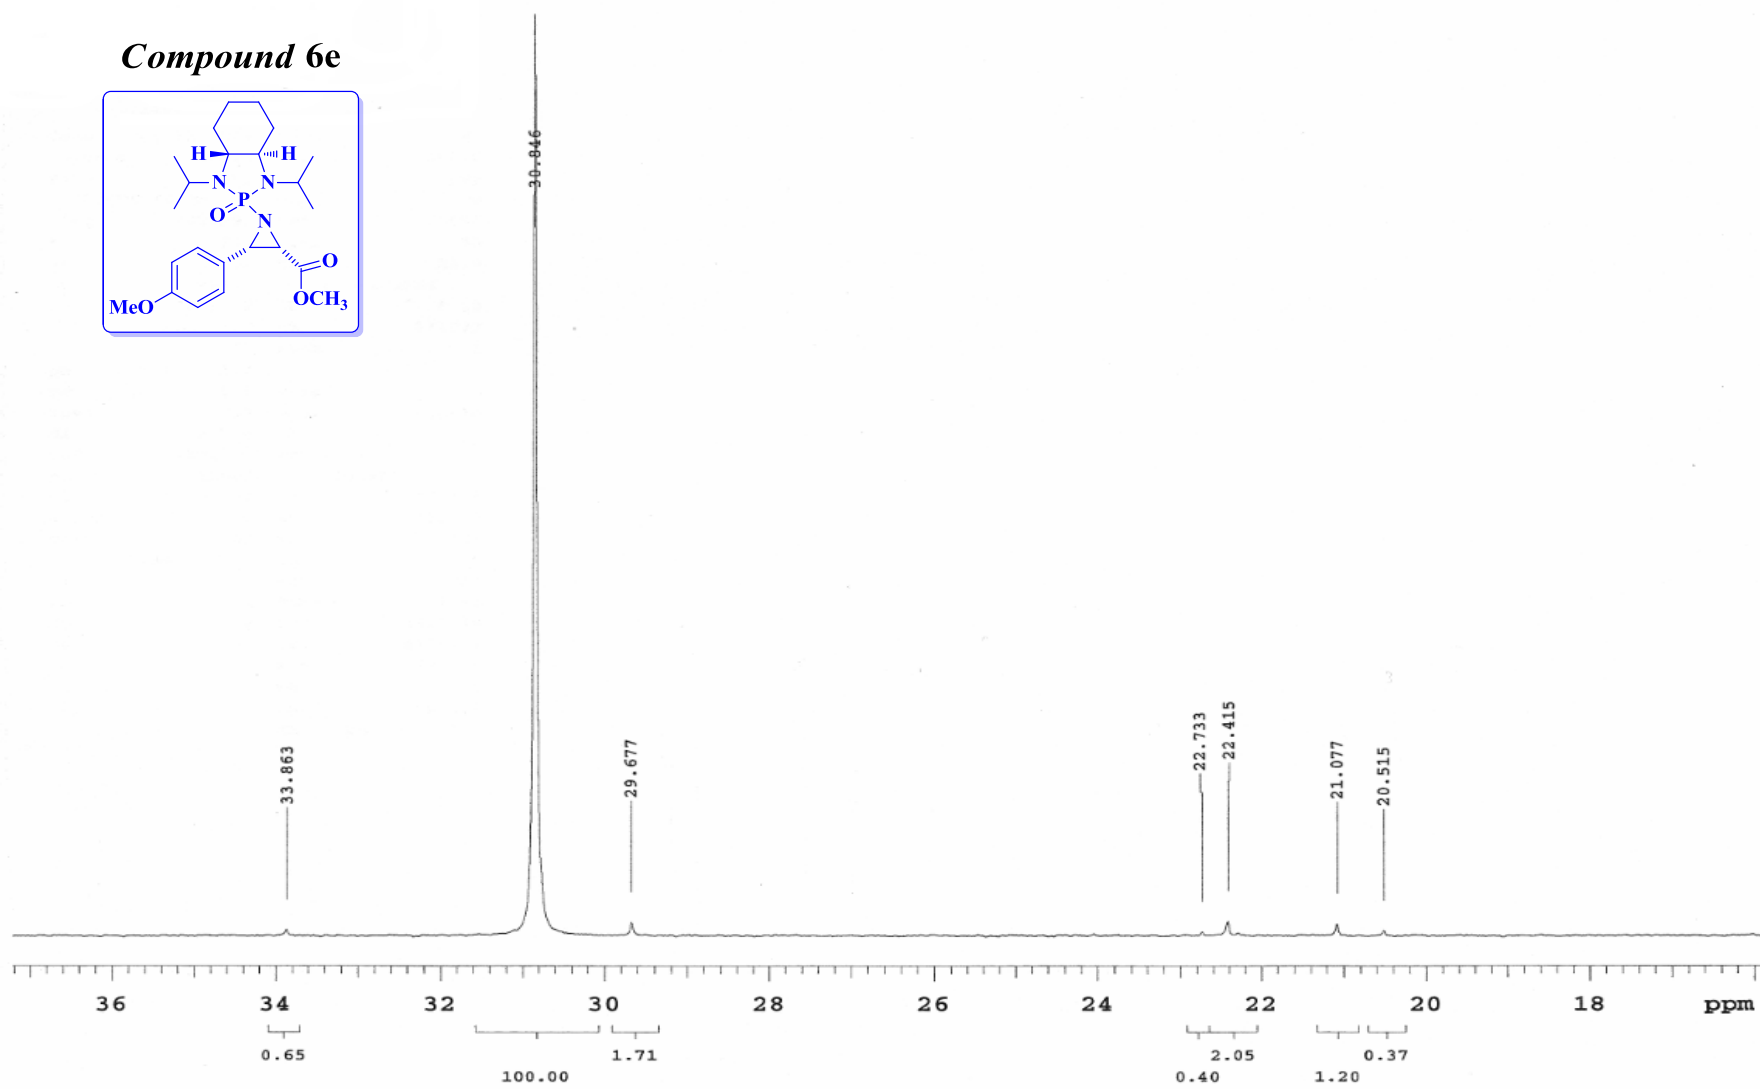



Padmanabha Kattamuri, PVK-D-12

University of Illinois, SCS, Mass Spectrometry Lab

Q-tof UE521

Qtof\_41960 39 (2.793) AM (Cen,5, 80.00, Ar,15000.0,0.00,0.70); Sm (SG, 2x5.00); Cm (39:41-7:10x8.000)

1: TOF MS ES+  
1.21e4

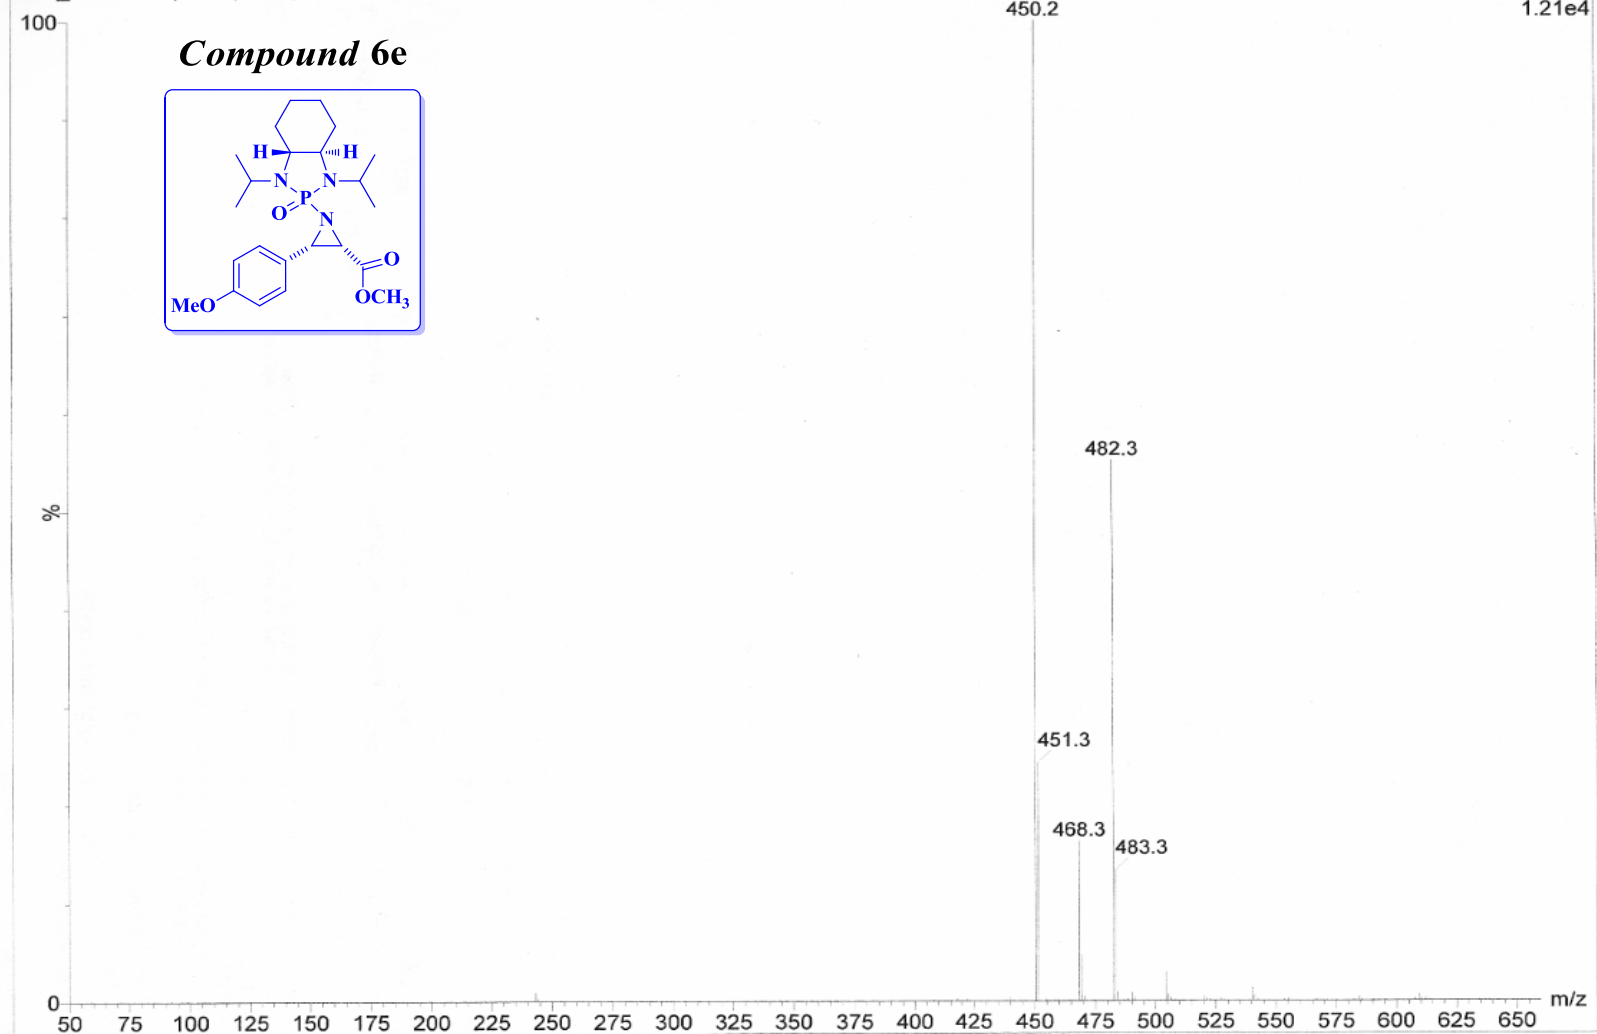

## Elemental Composition Report

Page 1

### Single Mass Analysis

Tolerance = 10.0 PPM / DBE: min = -1.5, max = 600.0

Element prediction: Off

Number of isotope peaks used for i-FIT = 3

Monoisotopic Mass, Even Electron Ions

96 formula(e) evaluated with 1 results within limits (all results (up to 1000) for each mass)

Elements Used:

C: 0-150 H: 0-250 N: 2-4 O: 2-4 P: 0-1

Padmanabha Kattamuri, PVK-D-12

University of Illinois, SCS, Mass Spectrometry Lab

Qtof\_41960 52 (3.721) AM (Cen,3, 80.00, Ar,15000.0,716.46,0.70,LS 3); Sm (SG, 2x3.00); Cm (52:54)

Q-tof UE521  
1: TOF MS ES+  
4.07e+003

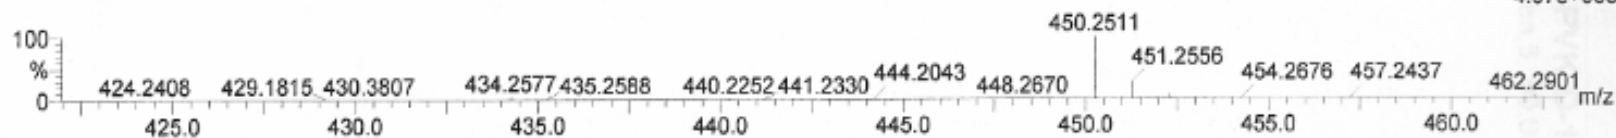

Minimum:

-1.5

Maximum:

5.0

10.0

600.0

| Mass     | Calc. Mass | mDa  | PPM  | DBE | i-FIT | Formula         |
|----------|------------|------|------|-----|-------|-----------------|
| 450.2511 | 450.2522   | -1.1 | -2.4 | 7.5 | 21.2  | C23 H37 N3 O4 P |

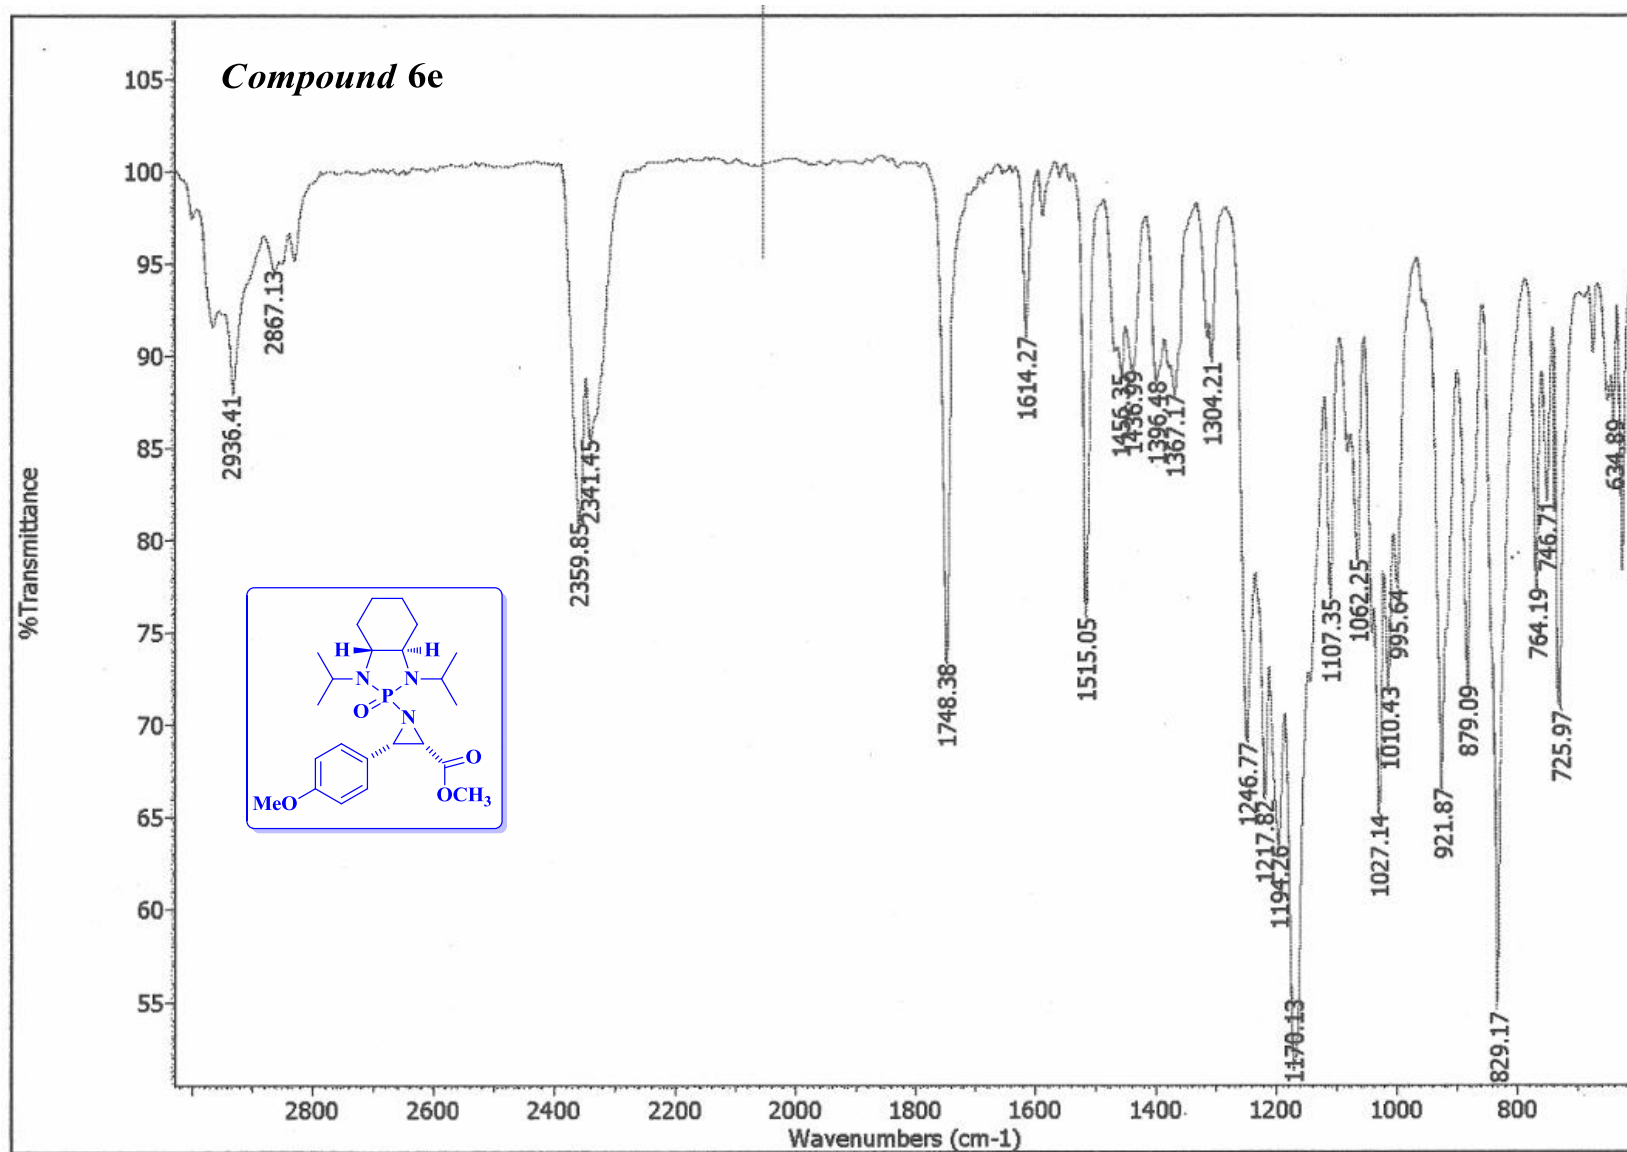

### Compound 6f

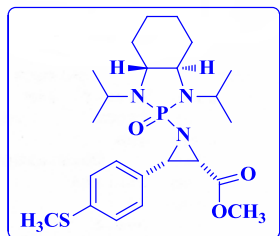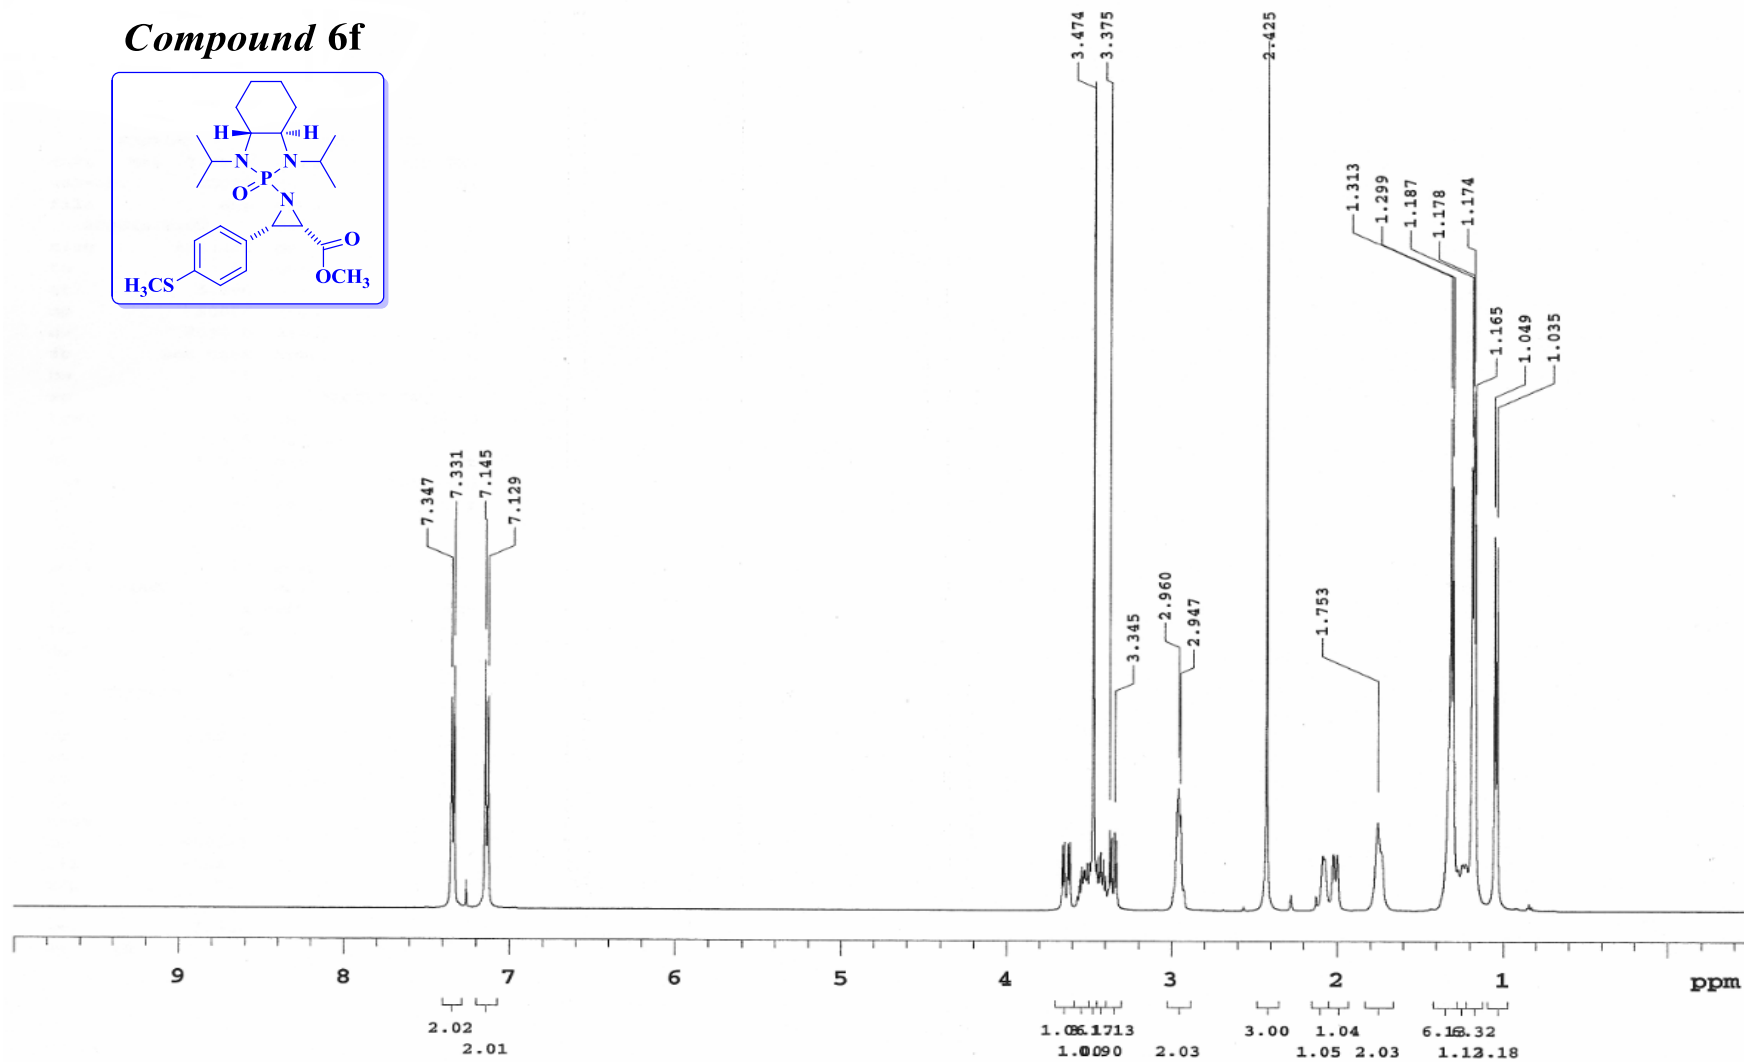

### Compound 6f

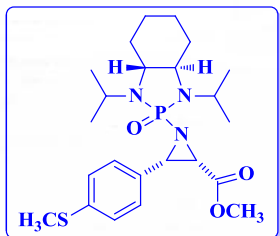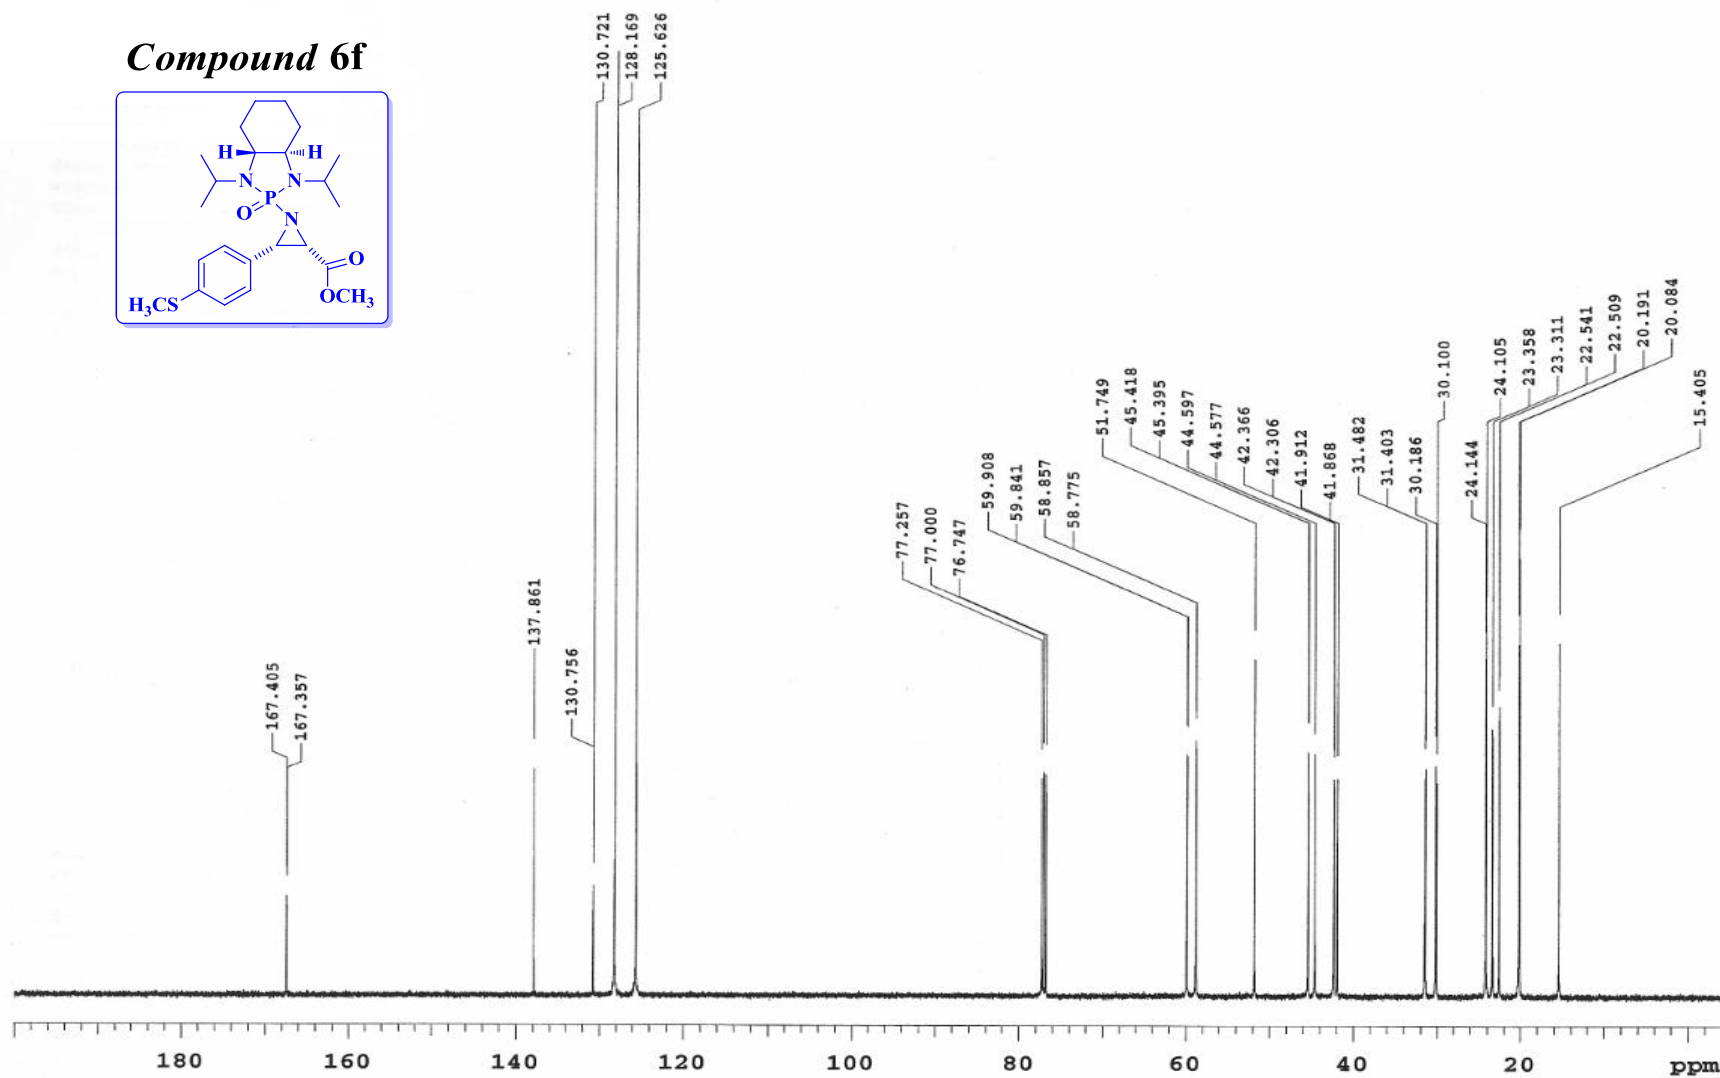

**Compound 6f**

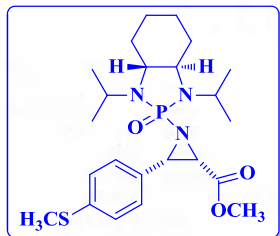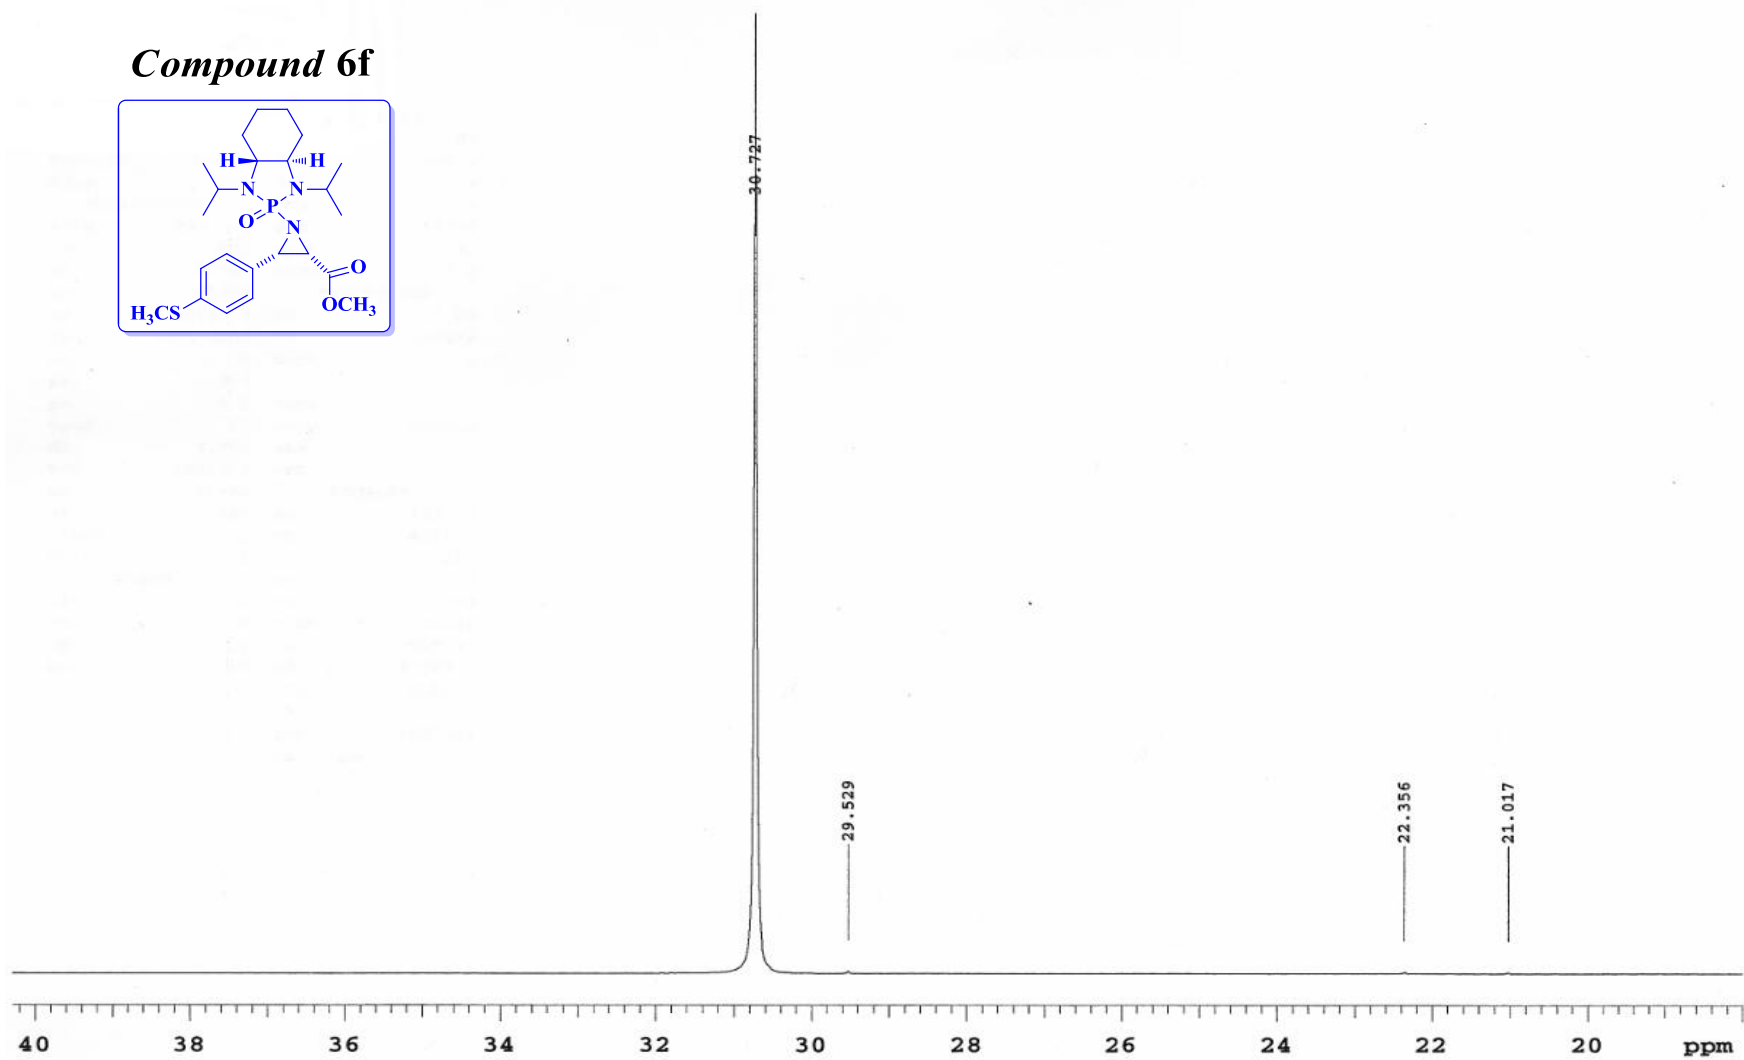

Padmanabha Kattamuri, PVK-D-59

University of Illinois, SCS, Mass Spectrometry Lab

Q-tof UE521

Qtof\_41970 35 (2.507) AM (Cen,5, 80.00, Ar,15000.0,0.00,0.70); Sm (SG, 2x5.00); Cm (35-12x8.000)

1: TOF MS ES+  
1.88e4

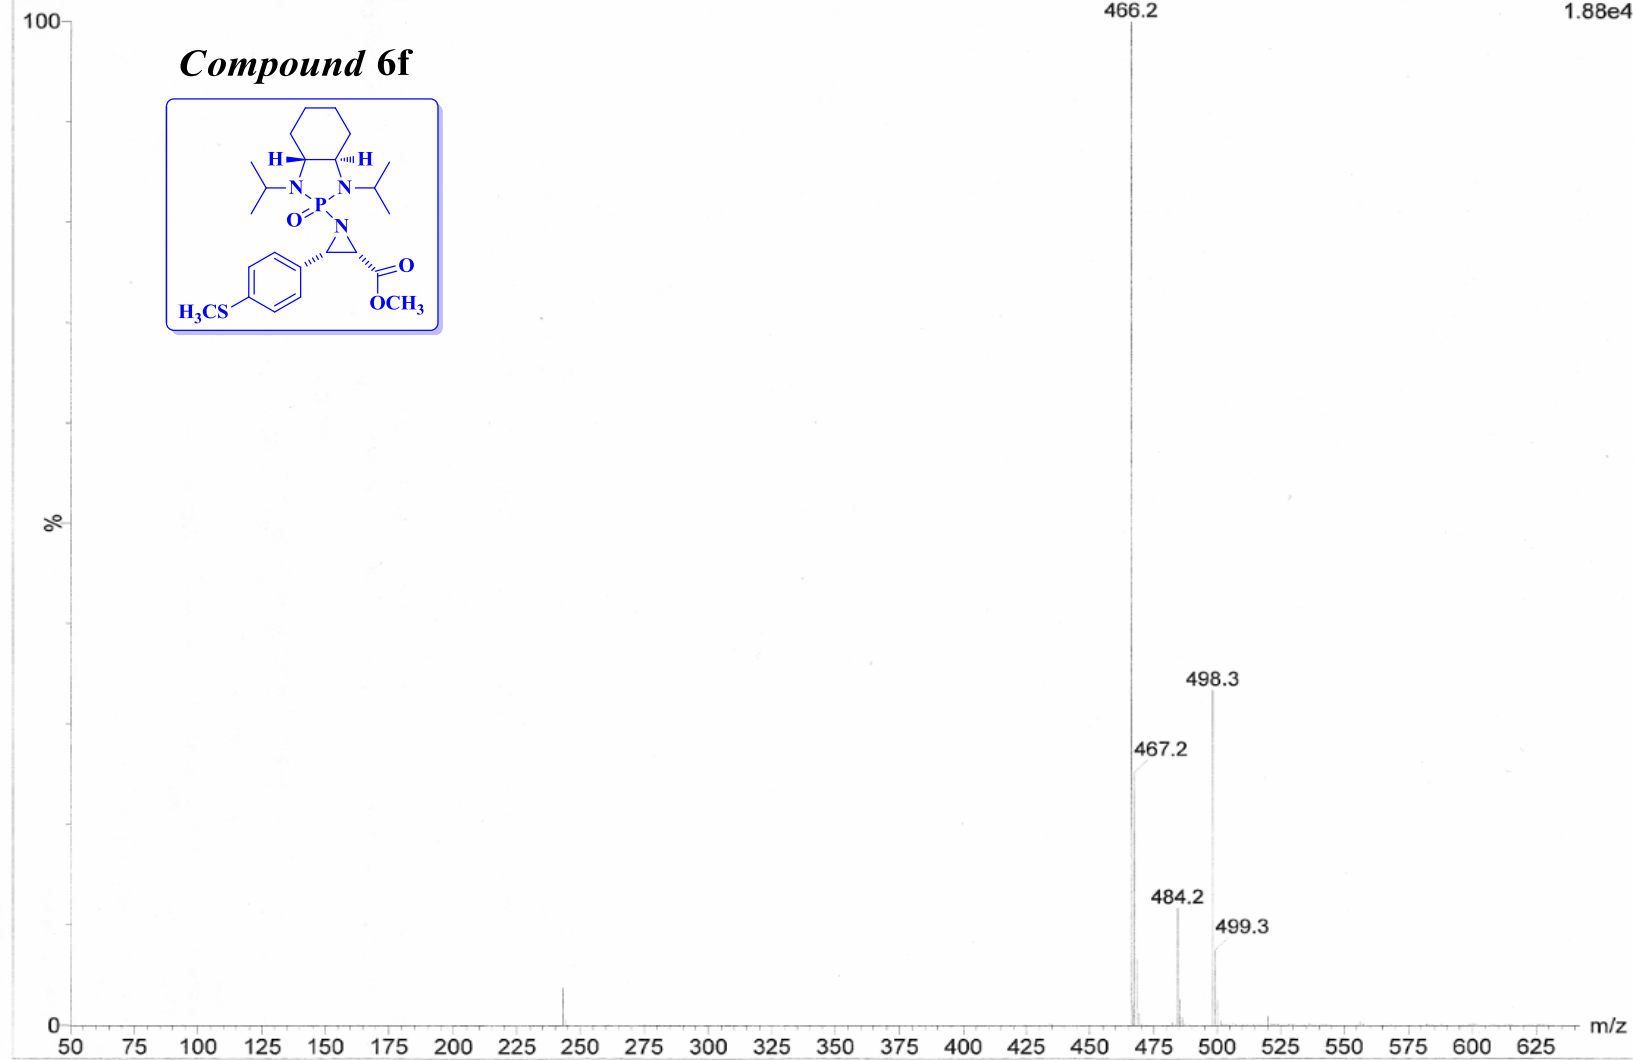

## Elemental Composition Report

Page 1

### Single Mass Analysis

Tolerance = 10.0 PPM / DBE: min = -1.5, max = 600.0

Element prediction: Off

Number of isotope peaks used for i-FIT = 3

Monoisotopic Mass, Even Electron Ions

193 formula(e) evaluated with 2 results within limits (all results (up to 1000) for each mass)

Elements Used:

C: 0-150 H: 0-250 N: 2-4 O: 2-4 P: 0-1 S: 0-1

Padmanabha Kattamuri, PVK-D-59

University of Illinois, SCS, Mass Spectrometry Lab

Qtof\_41970 29 (2.043) AM (Cen,3, 80.00, Ar,15000.0,716.46,0.70); Sm (SG, 2x3.00); Cm (28:29)

Q-tof UE521

2: TOF MS ES+

3.20e+002

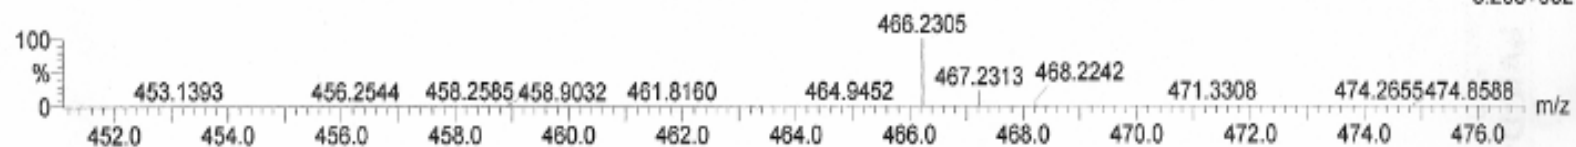

Minimum: -1.5  
Maximum: 5.0 10.0 600.0

| Mass     | Calc. Mass | mDa | PPM | DBE  | i-FIT | Formula           |
|----------|------------|-----|-----|------|-------|-------------------|
| 466.2305 | 466.2293   | 1.2 | 2.6 | 7.5  | 2.2   | C23 H37 N3 O3 P S |
|          | 466.2260   | 4.5 | 9.7 | 12.5 | 5.7   | C26 H33 N3 O3 P   |



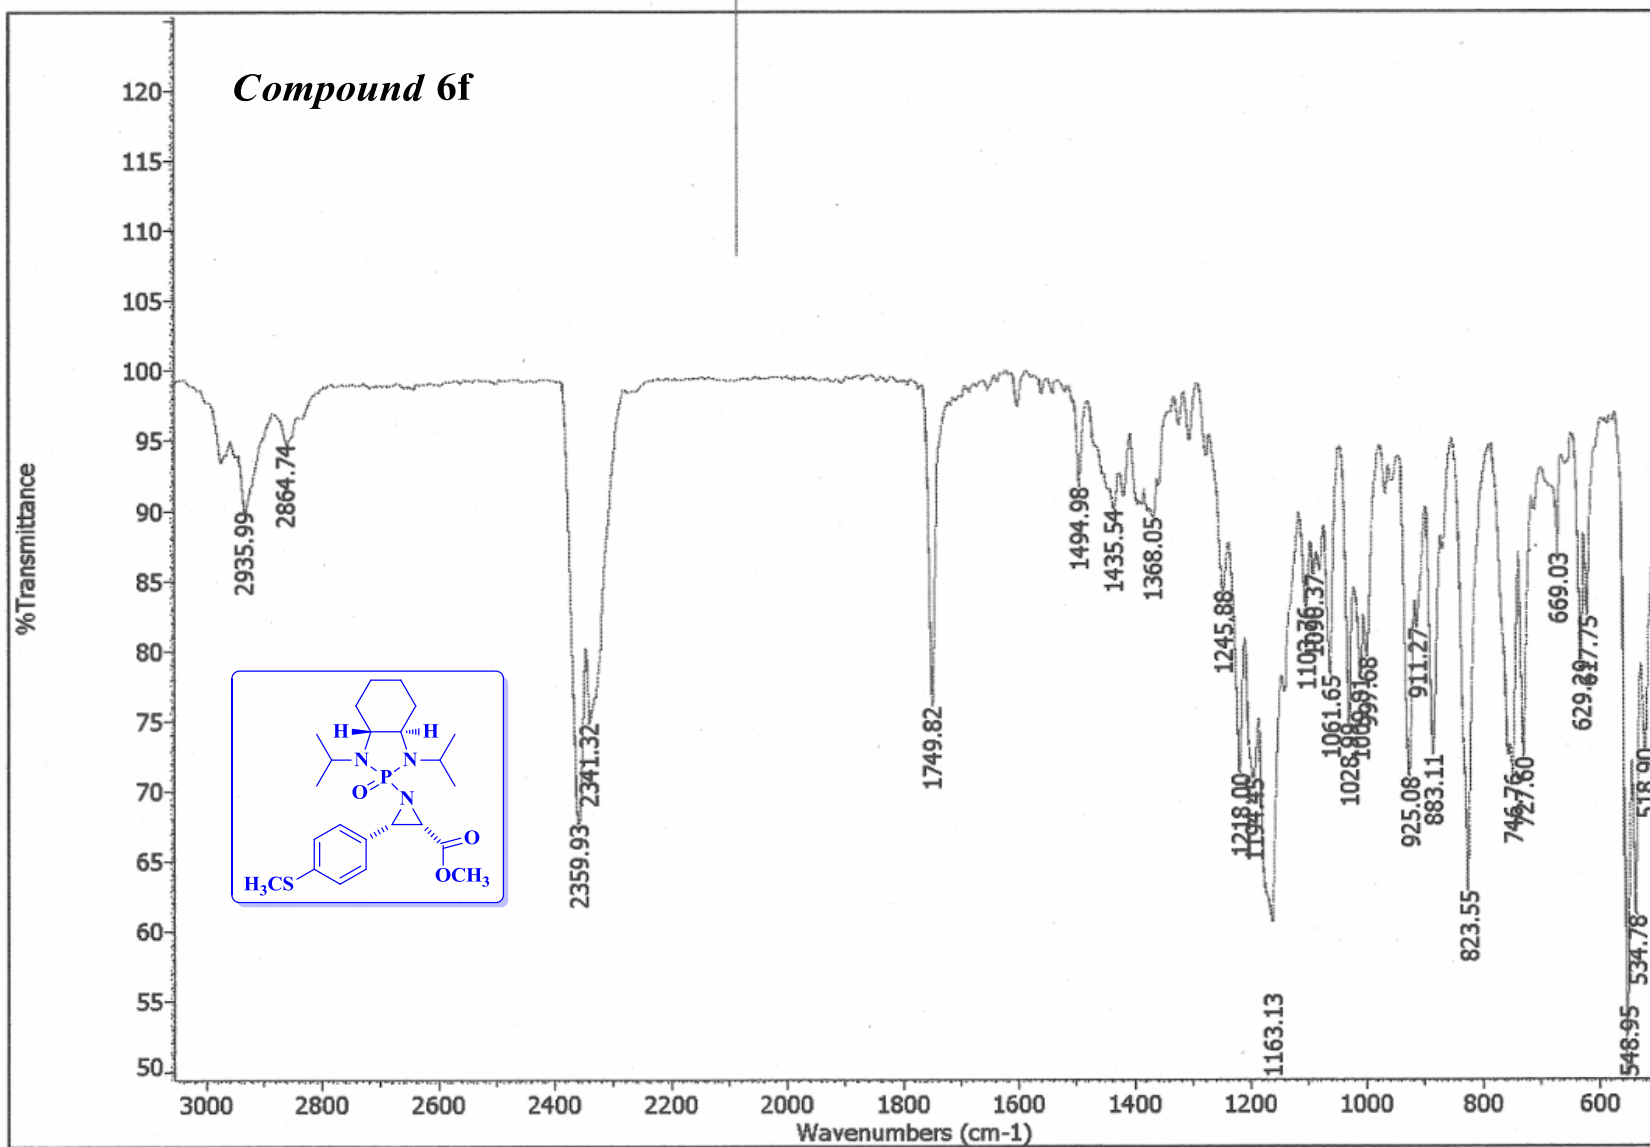

### Compound 6g

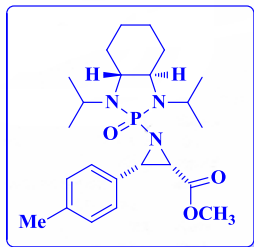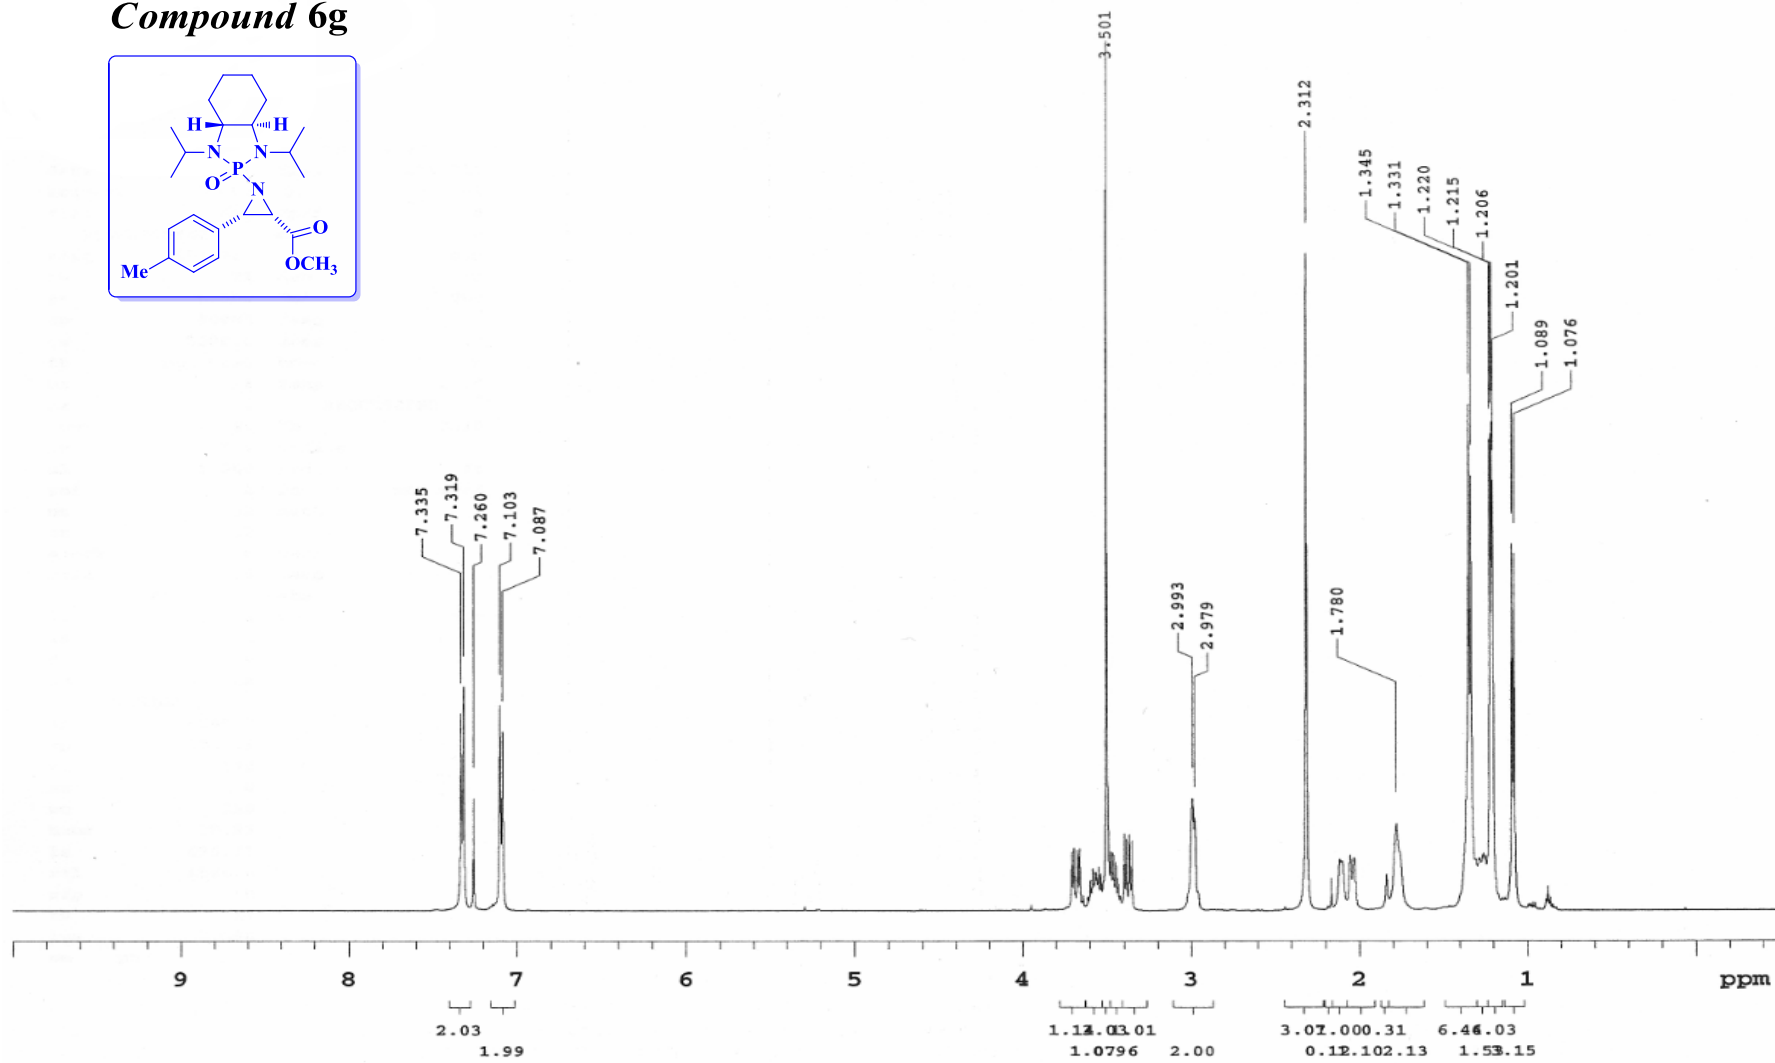

### Compound 6g

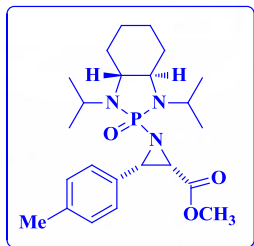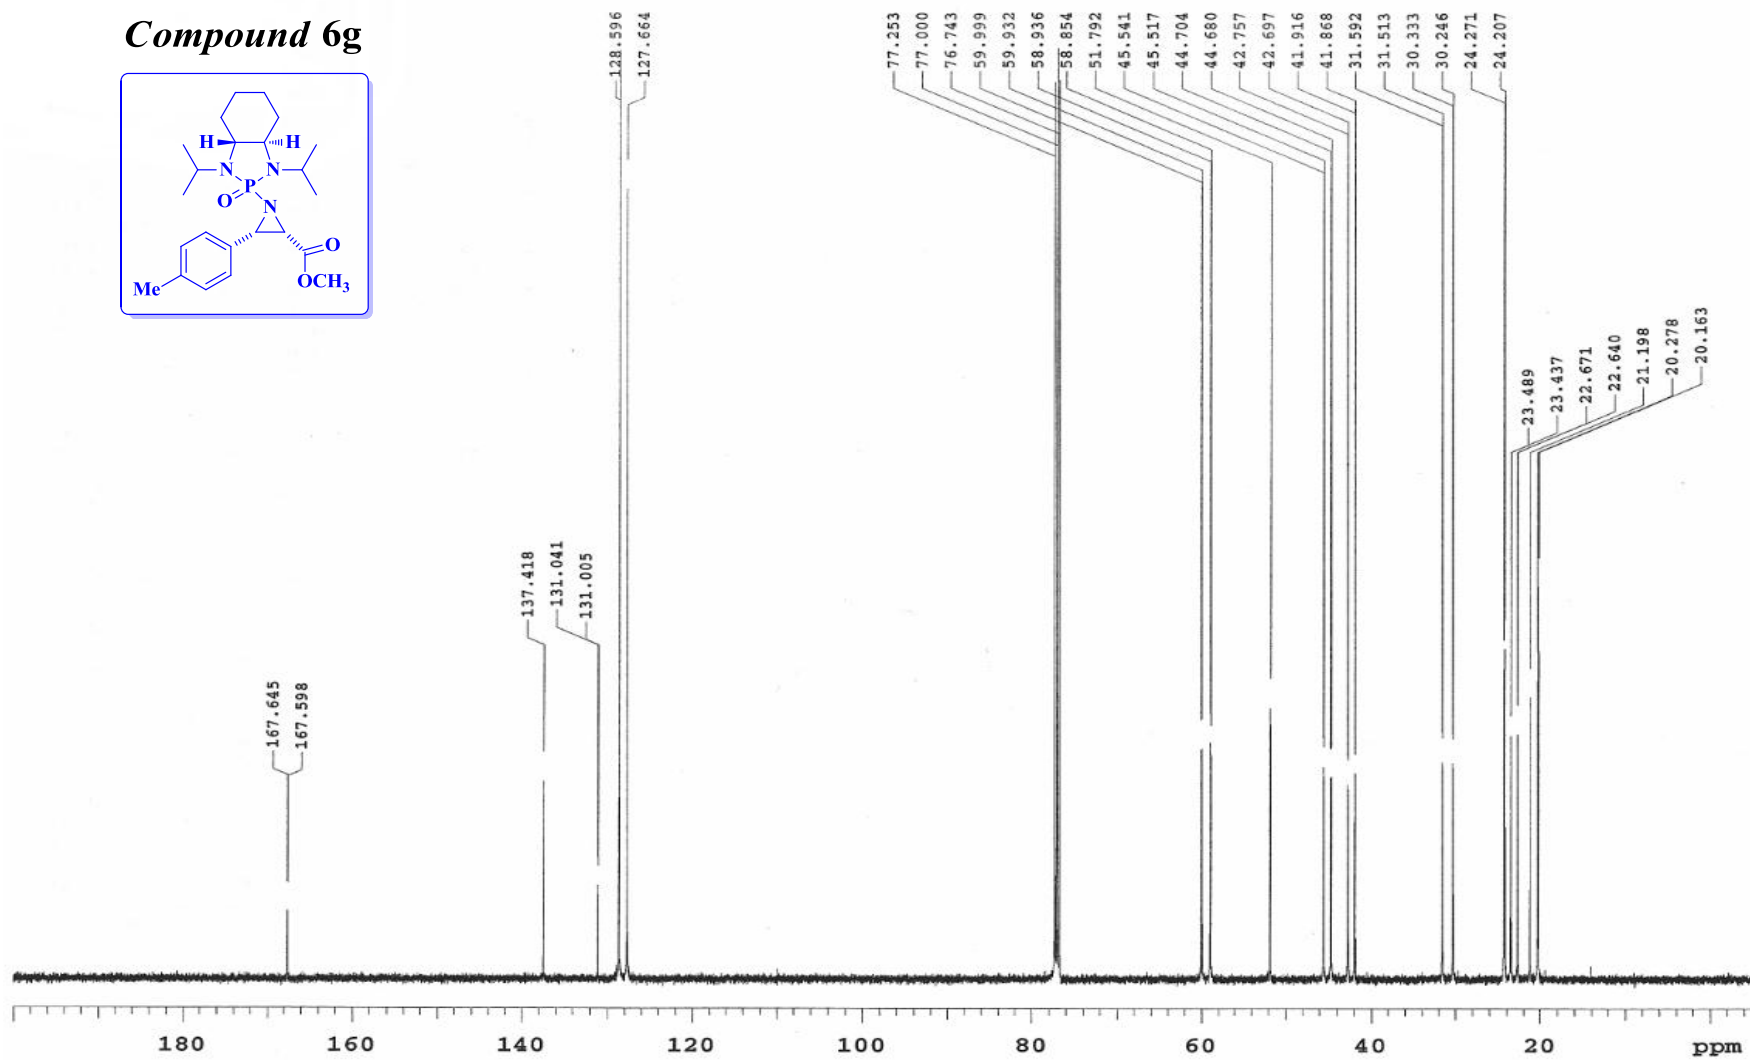

### Compound 6g

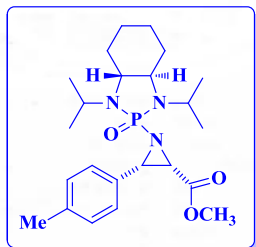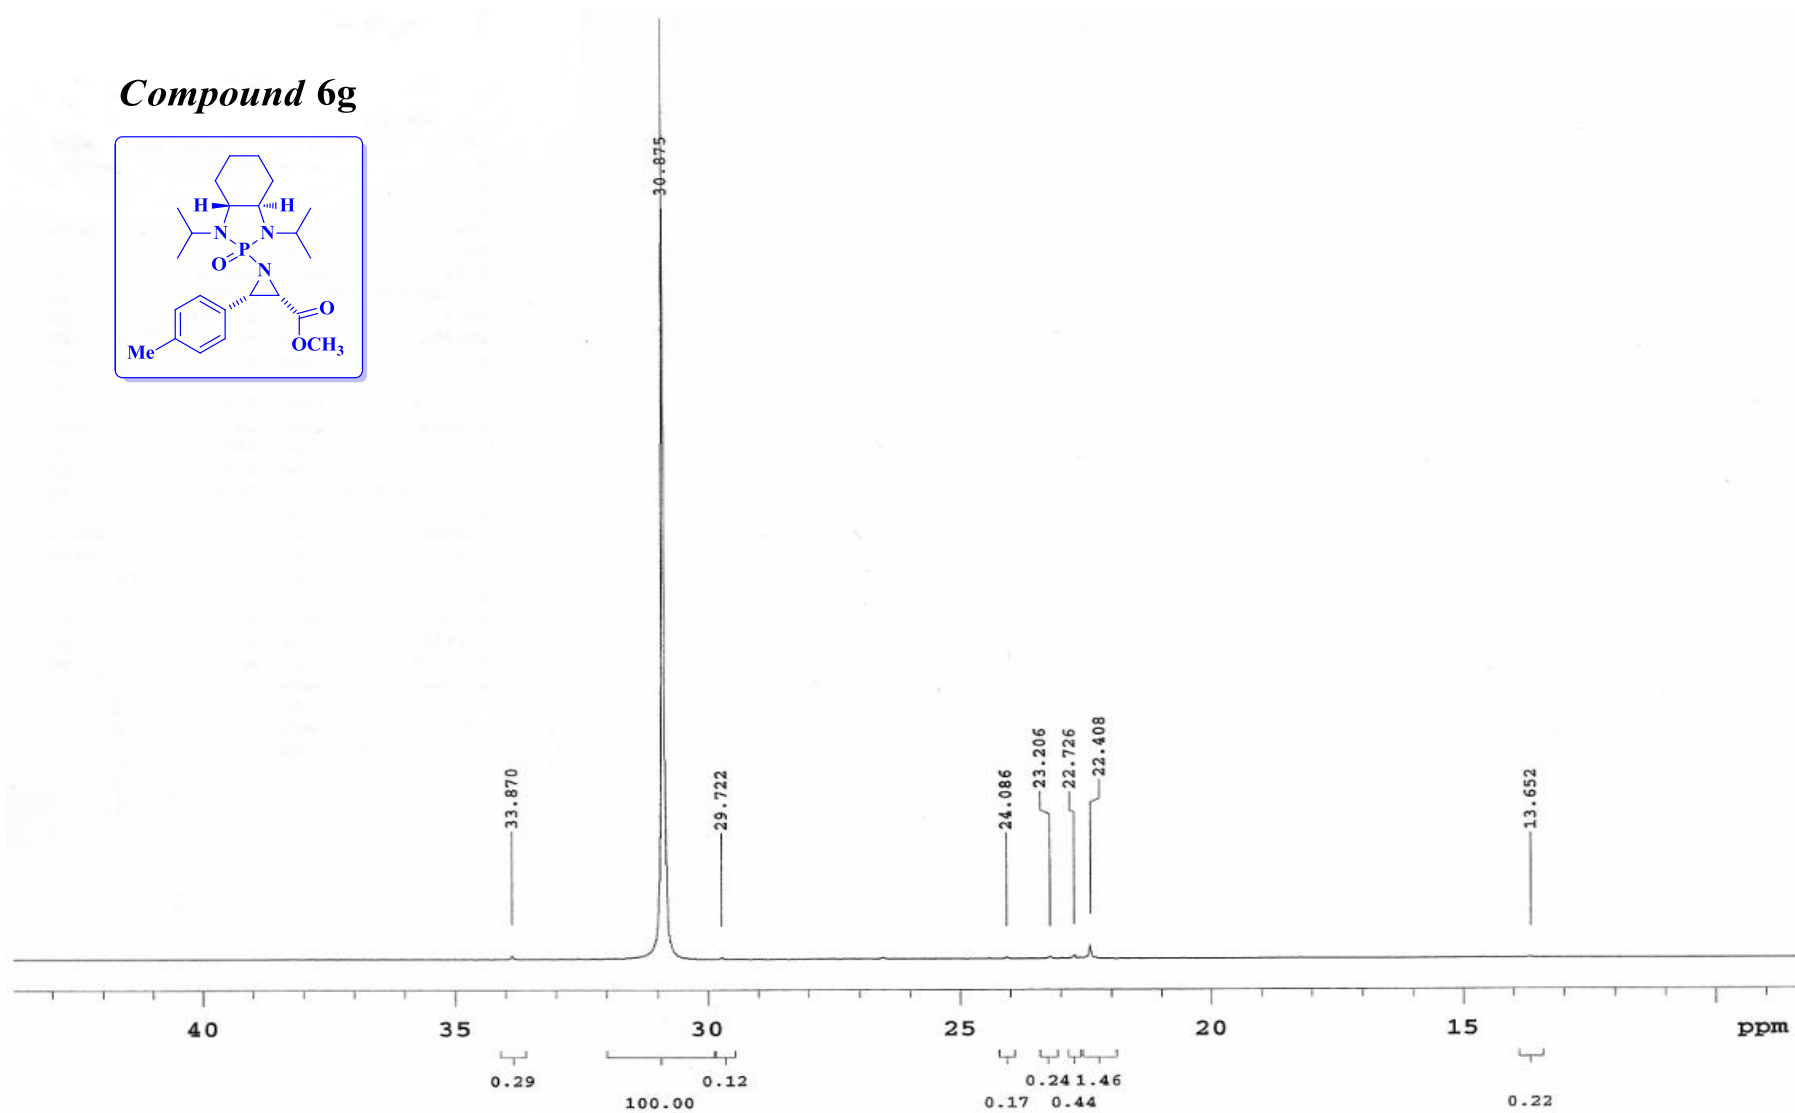

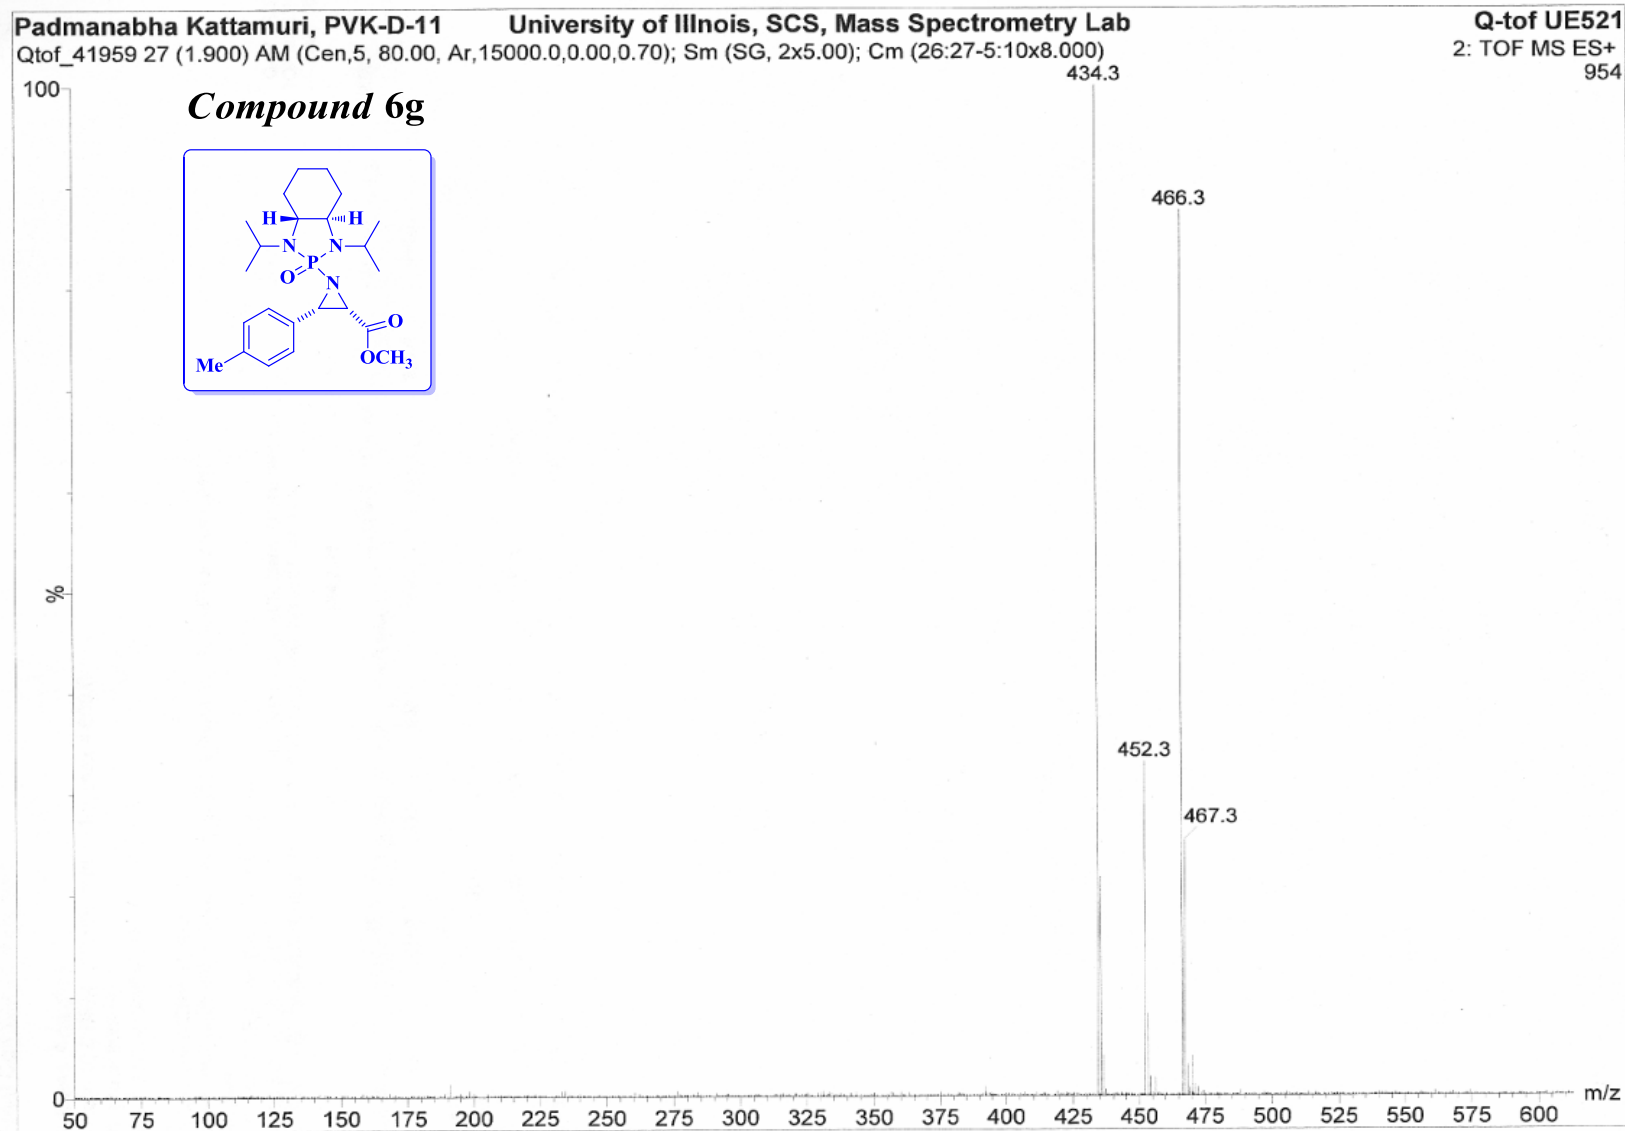

## Elemental Composition Report

Page 1

### Single Mass Analysis

Tolerance = 10.0 PPM / DBE: min = -1.5, max = 600.0

Element prediction: Off

Number of isotope peaks used for i-FIT = 3

Monoisotopic Mass, Even Electron Ions

91 formula(e) evaluated with 1 results within limits (all results (up to 1000) for each mass)

Elements Used:

C: 0-150 H: 0-250 N: 2-4 O: 2-4 P: 0-1

Padmanabha Kattamuri, PVK-D-11

University of Illinois, SCS, Mass Spectrometry Lab

Qtof\_41959 24 (1.686) AM (Cen,3, 80.00, Ar,15000.0,716.46,0.70); Sm (SG, 2x3.00); Cm (21:24)

Q-tof UE521  
2: TOF MS ES+  
7.60e+002

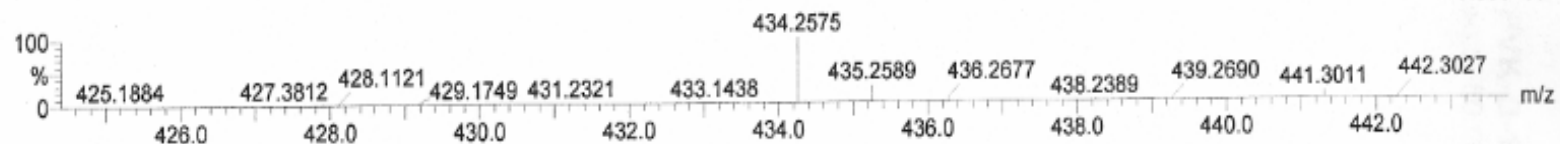

Minimum: -1.5  
Maximum: 5.0 10.0 600.0

| Mass     | Calc. Mass | mDa | PPM | DBE | i-FIT | Formula         |
|----------|------------|-----|-----|-----|-------|-----------------|
| 434.2575 | 434.2573   | 0.2 | 0.5 | 7.5 | 0.5   | C23 H37 N3 O3 P |

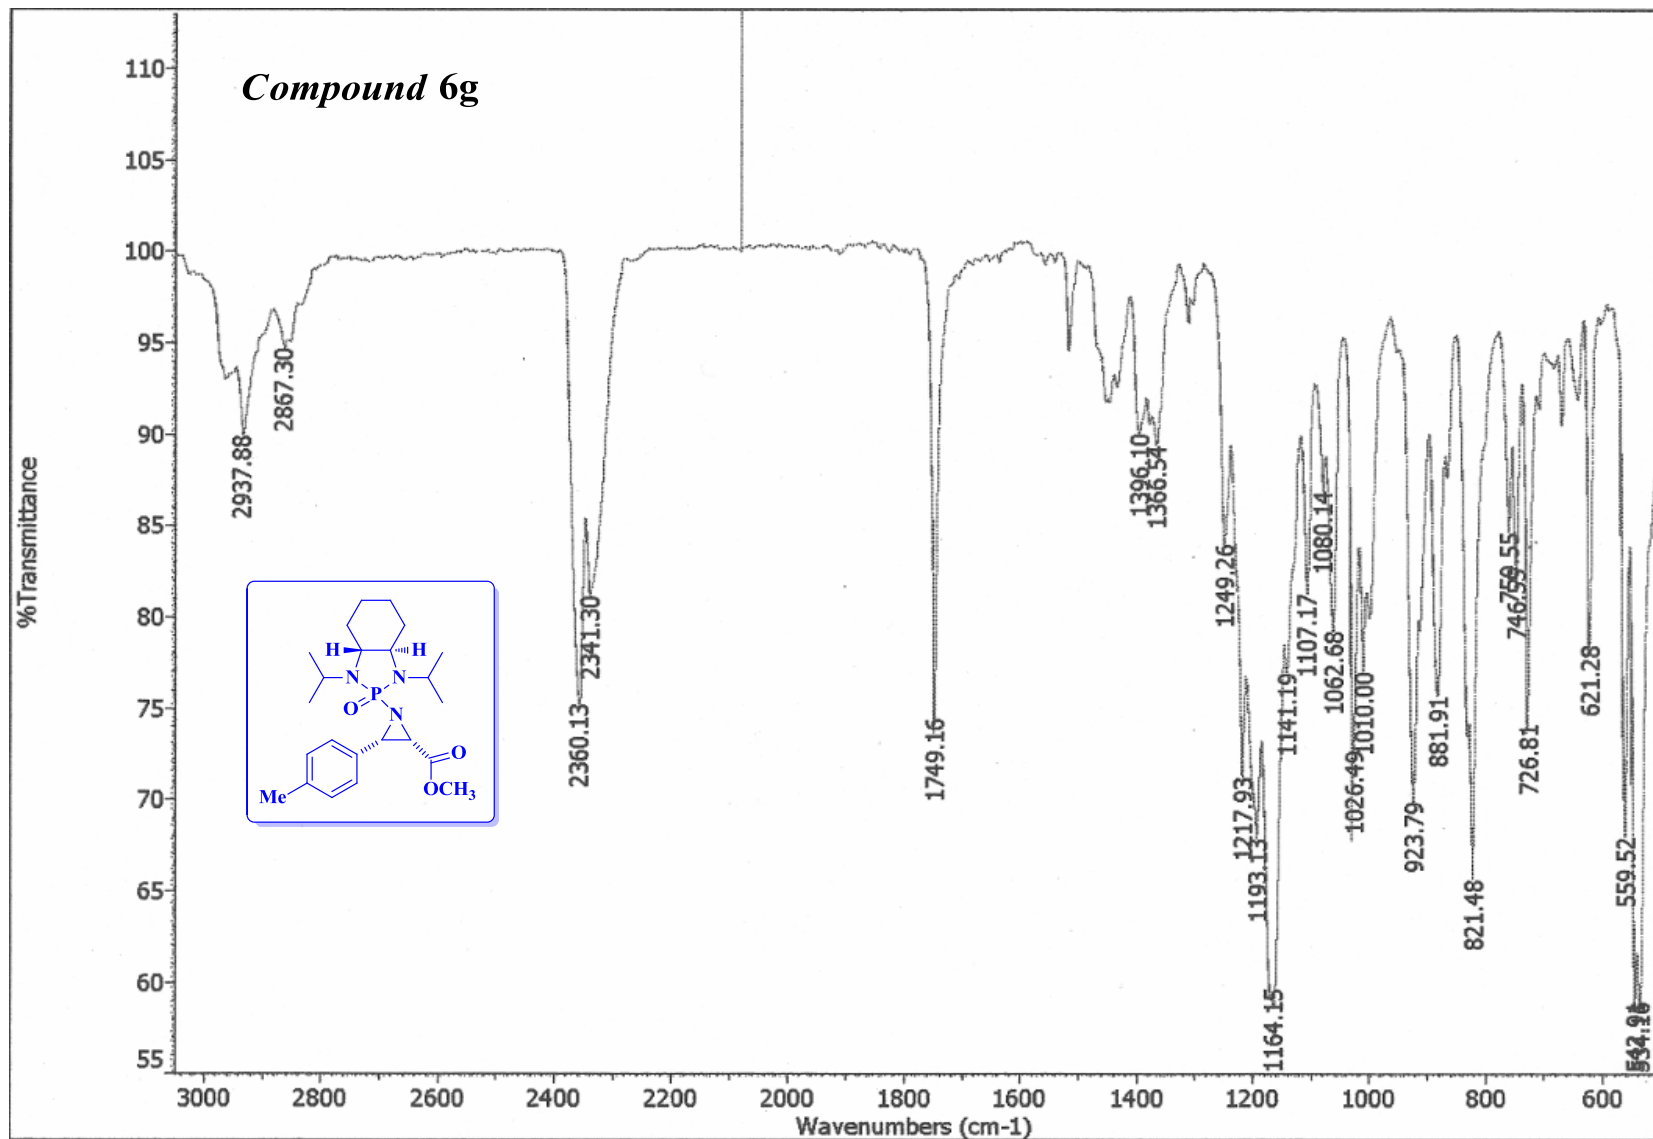

### Compound 6h

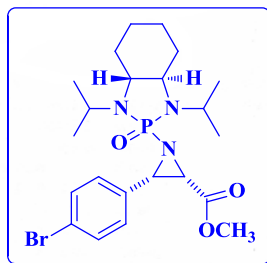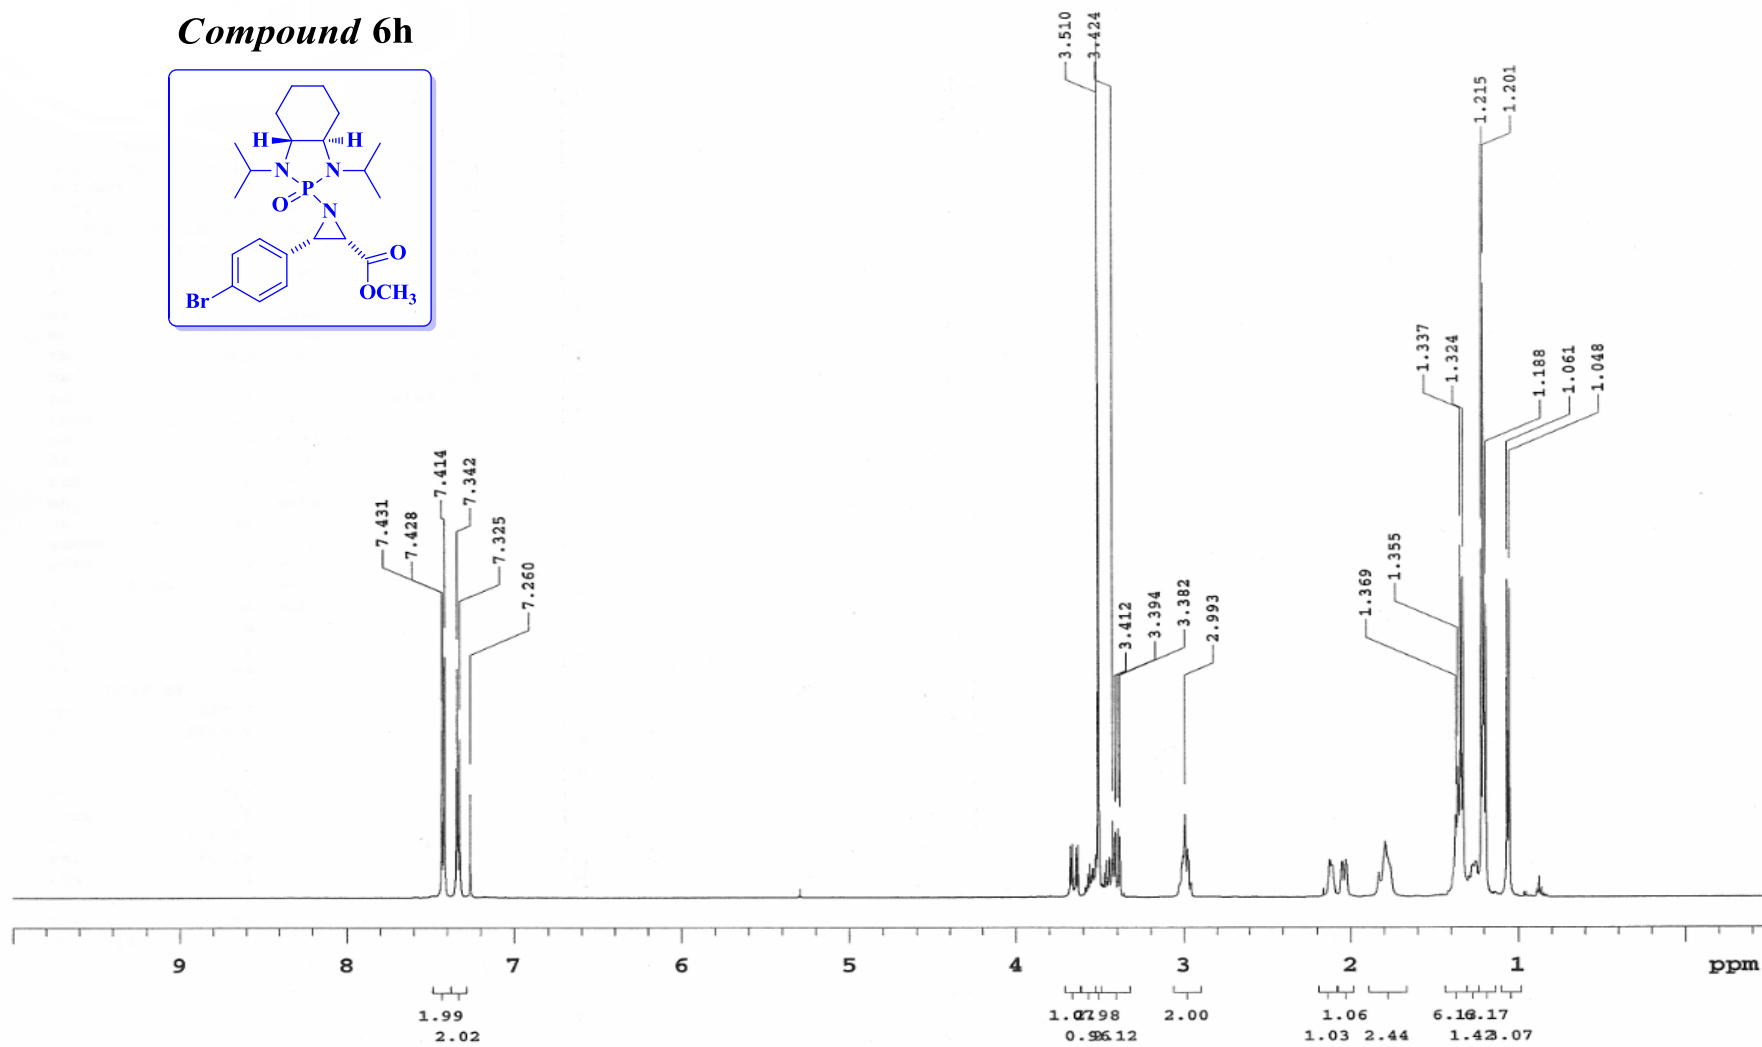



### Compound 6h

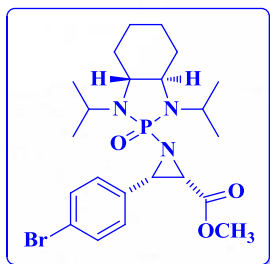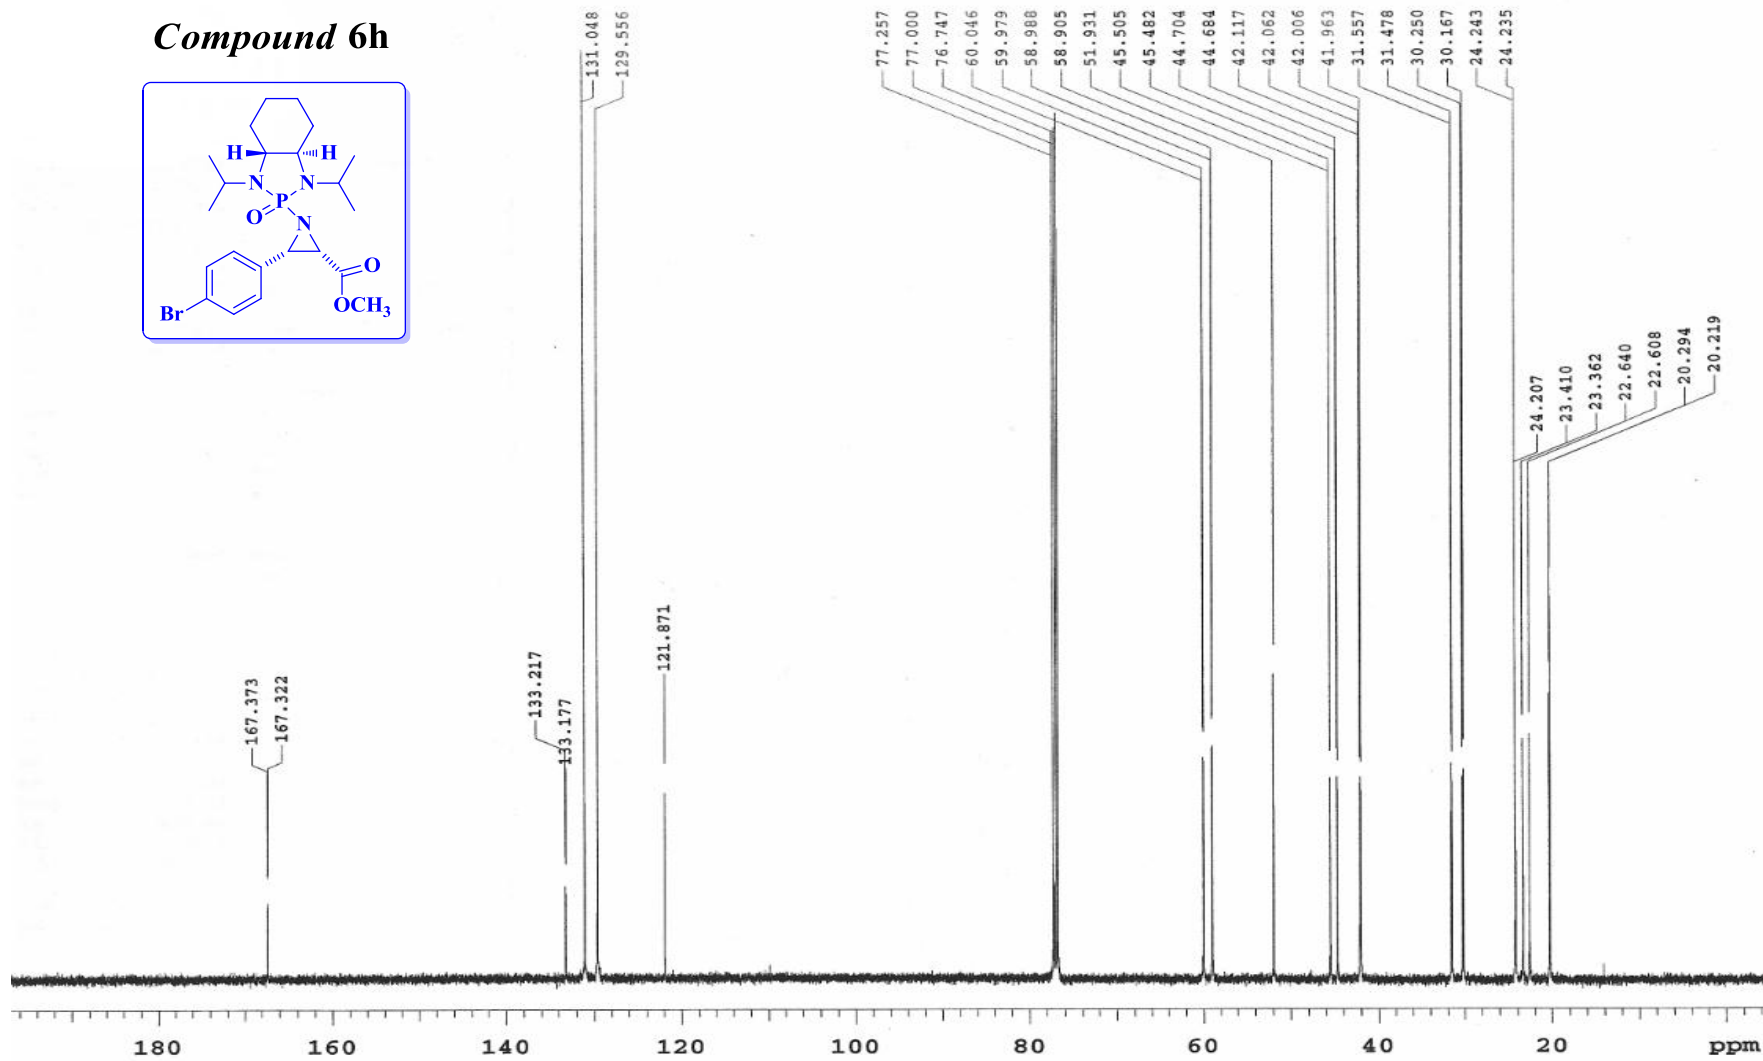

### Compound 6h

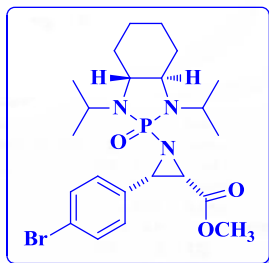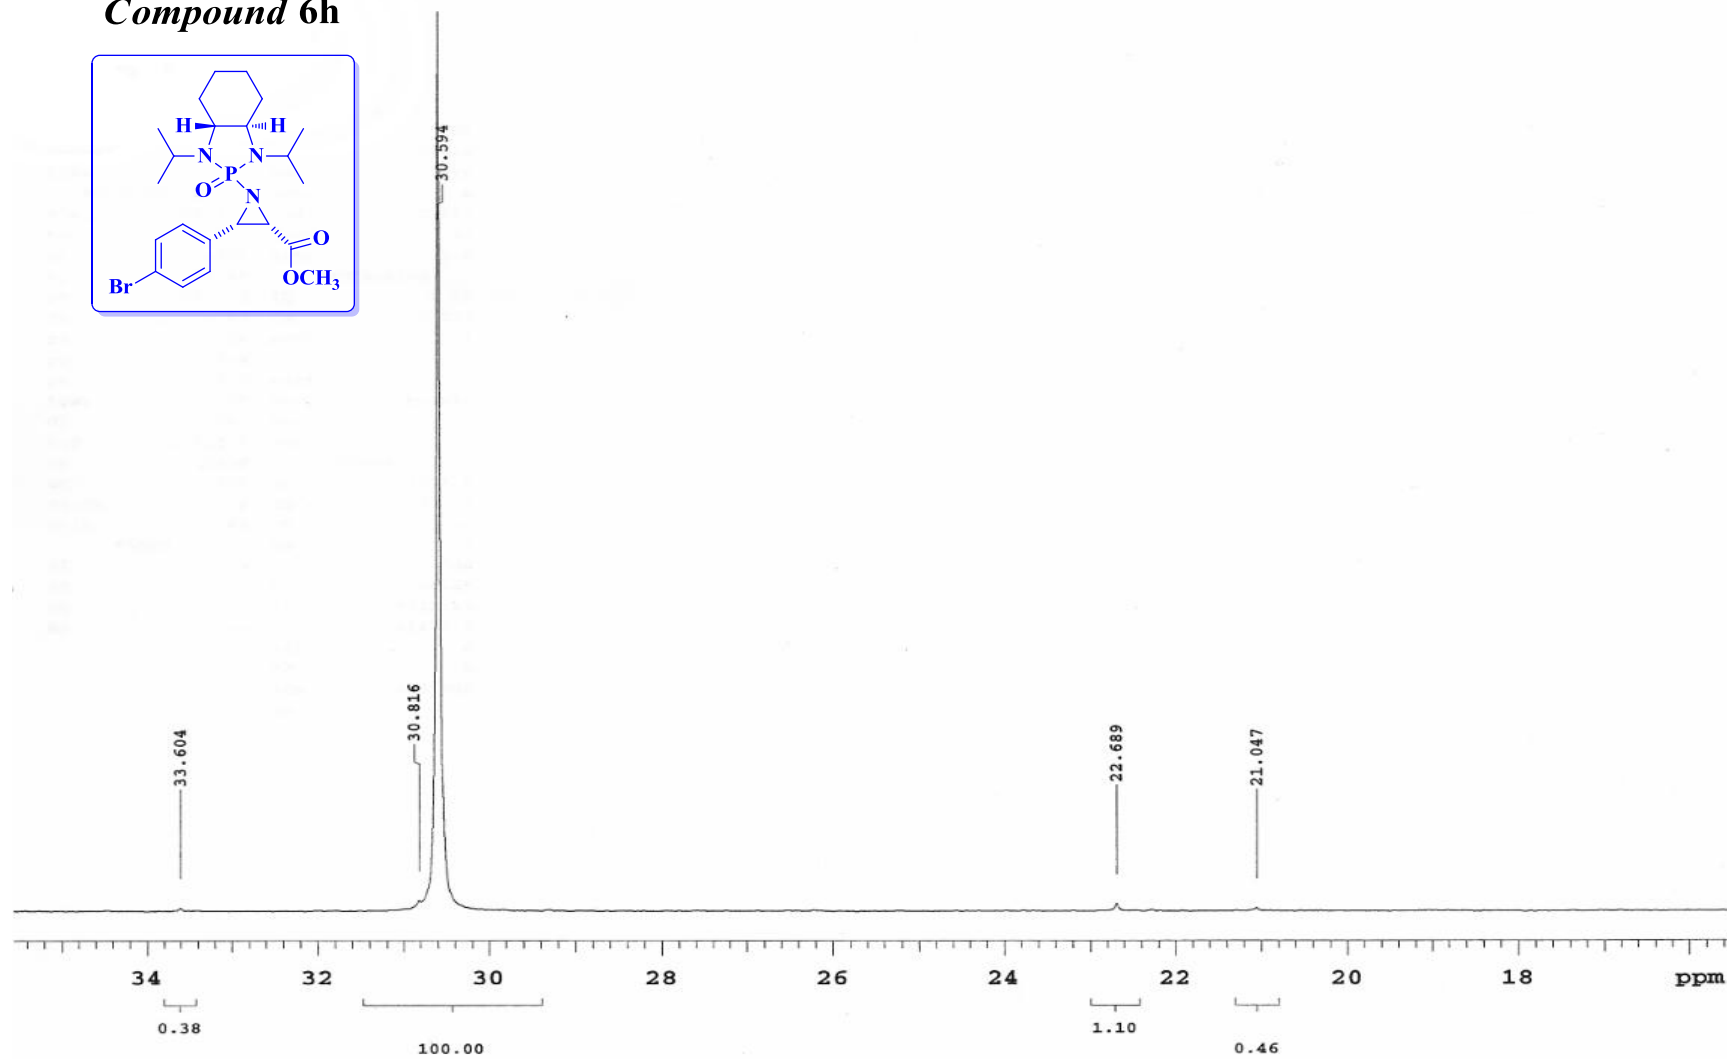

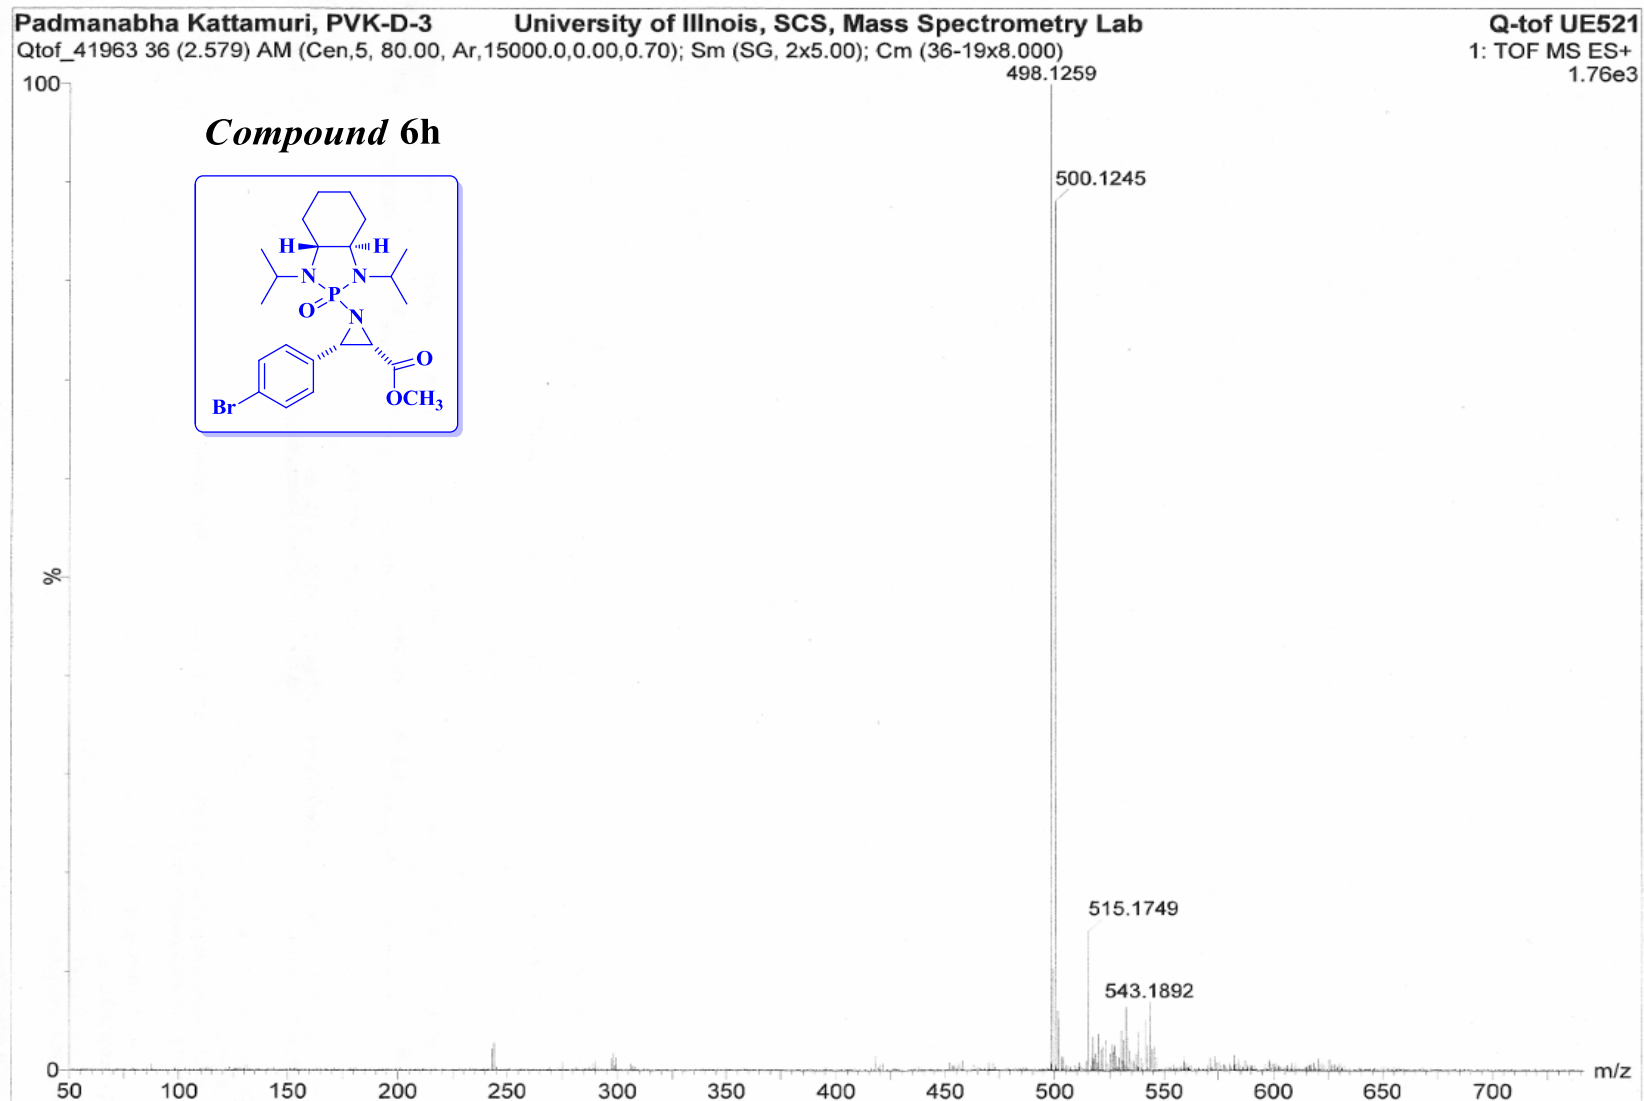

## Elemental Composition Report

Page 1

### Single Mass Analysis

Tolerance = 10.0 PPM / DBE: min = -1.5, max = 600.0

Element prediction: Off

Number of isotope peaks used for i-FIT = 3

Monoisotopic Mass, Even Electron Ions

87 formula(e) evaluated with 1 results within limits (all results (up to 1000) for each mass)

Elements Used:

C: 0-150 H: 0-250 N: 2-4 O: 2-4 P: 0-1 Br: 1-1

Padmanabha Kattamuri, PVK-D-3

University of Illinois, SCS, Mass Spectrometry Lab

Qtof\_41963 34 (2.400) AM (Cen,3, 80.00, Ar,15000.0,716.46,0.70); Sm (SG, 2x3.00); Cm (31:36)

Q-tof UE521

2: TOF MS ES+

7.77e+002

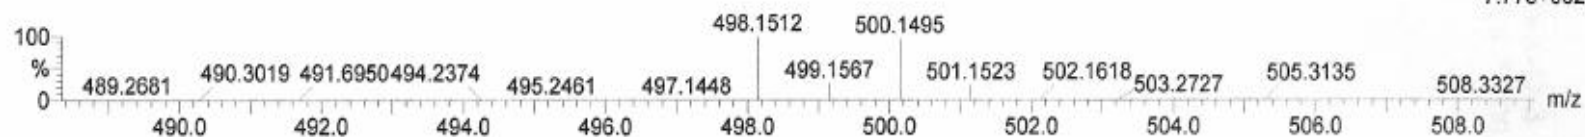

Minimum:

Maximum: 5.0 10.0 -1.5 600.0

| Mass     | Calc. Mass | mDa  | PPM  | DBE | i-FIT | Formula            |
|----------|------------|------|------|-----|-------|--------------------|
| 498.1512 | 498.1521   | -0.9 | -1.8 | 7.5 | 0.5   | C22 H34 N3 O3 P Br |

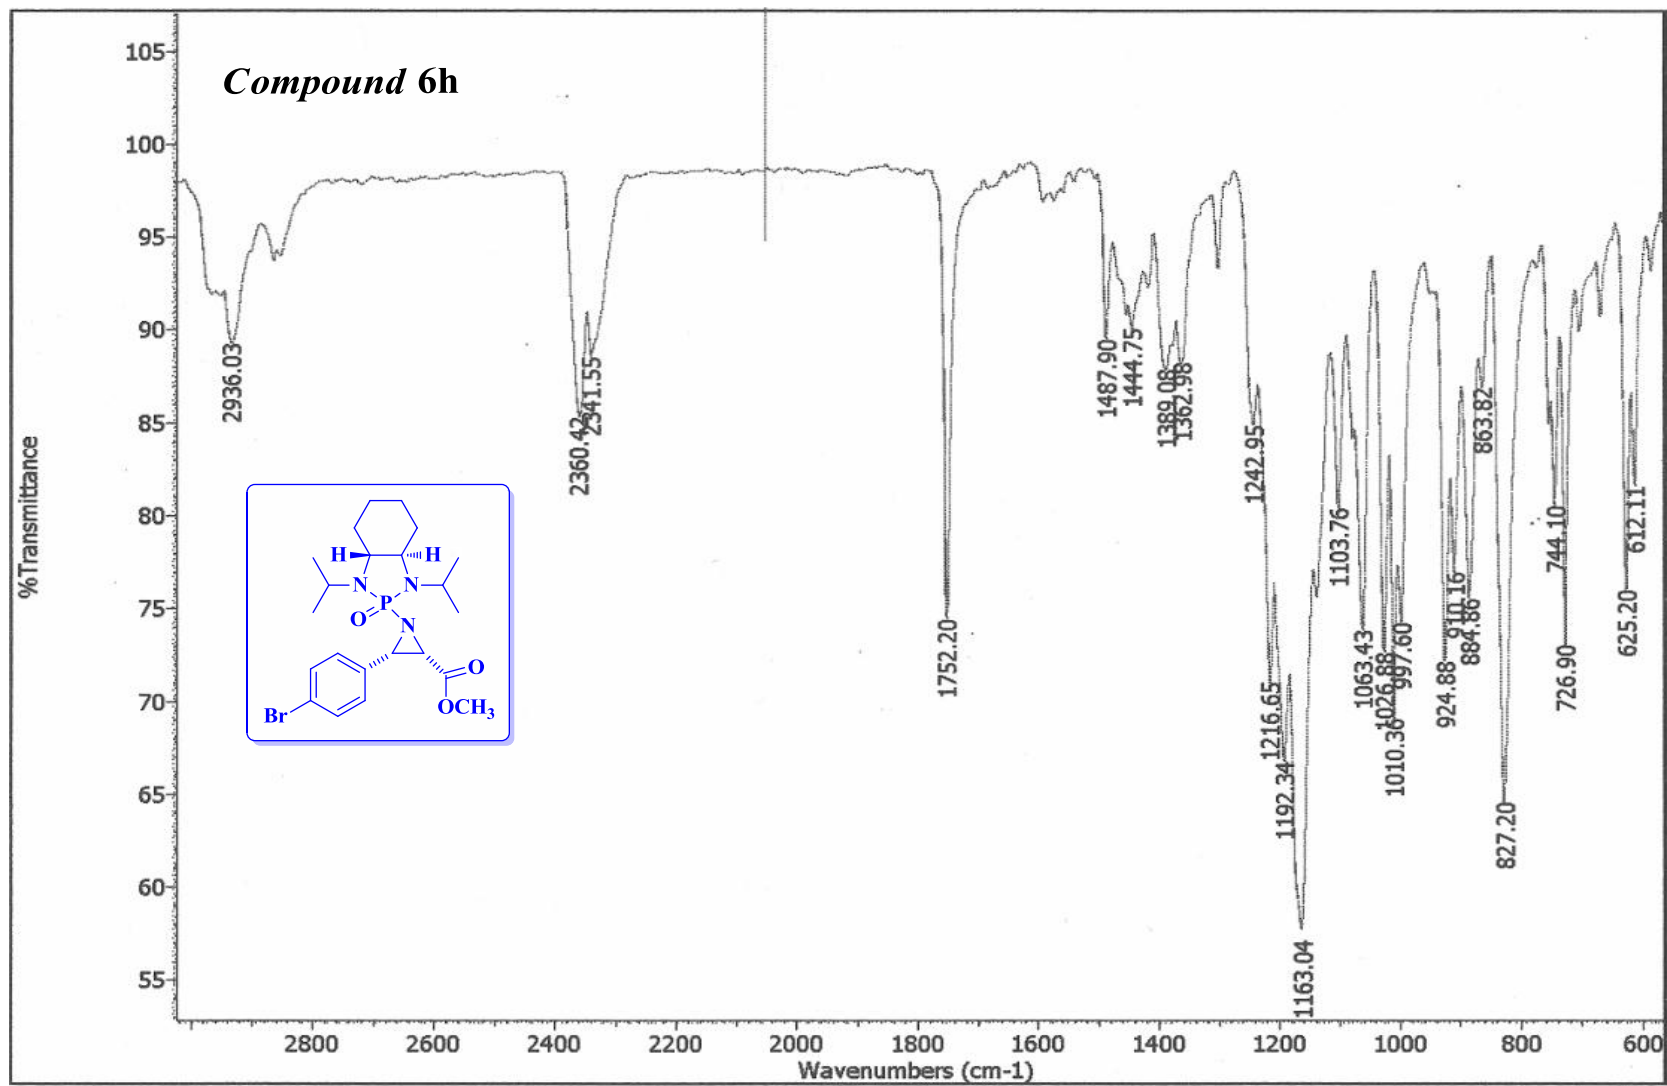

### Compound 6i

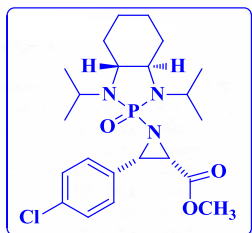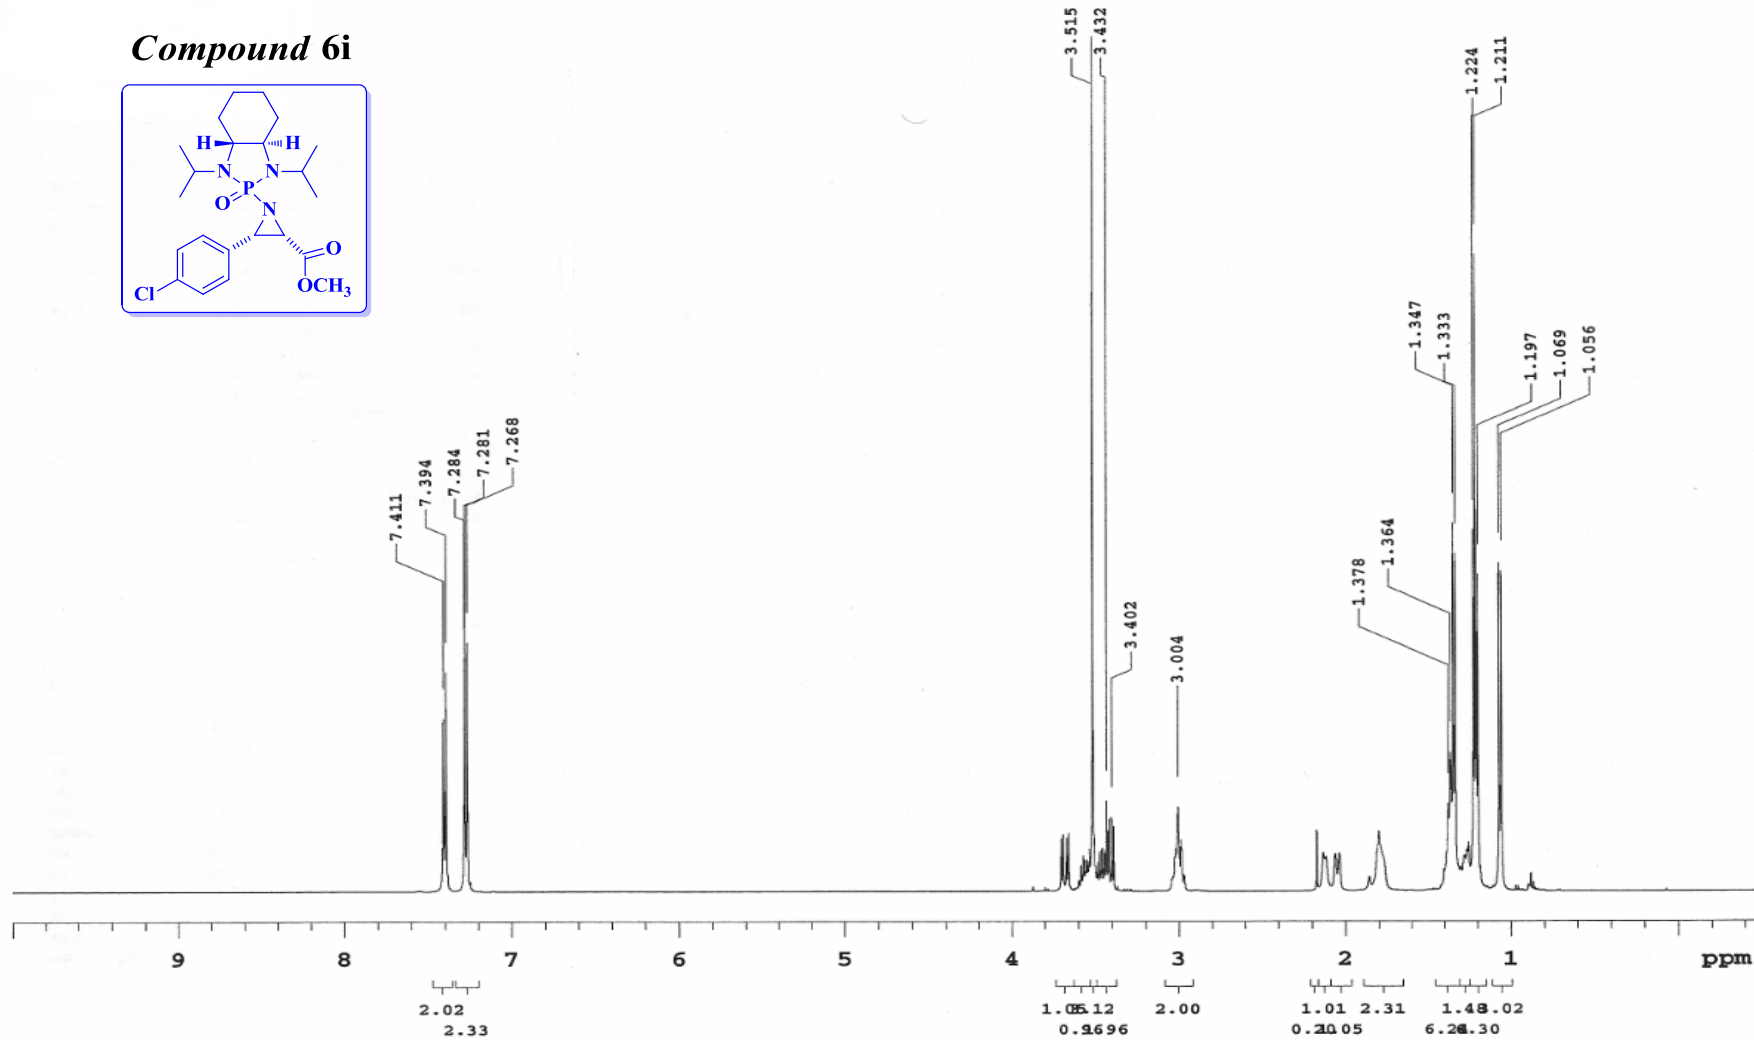

### Compound 6i

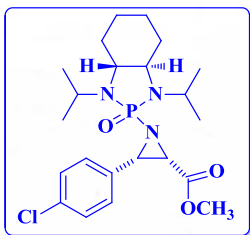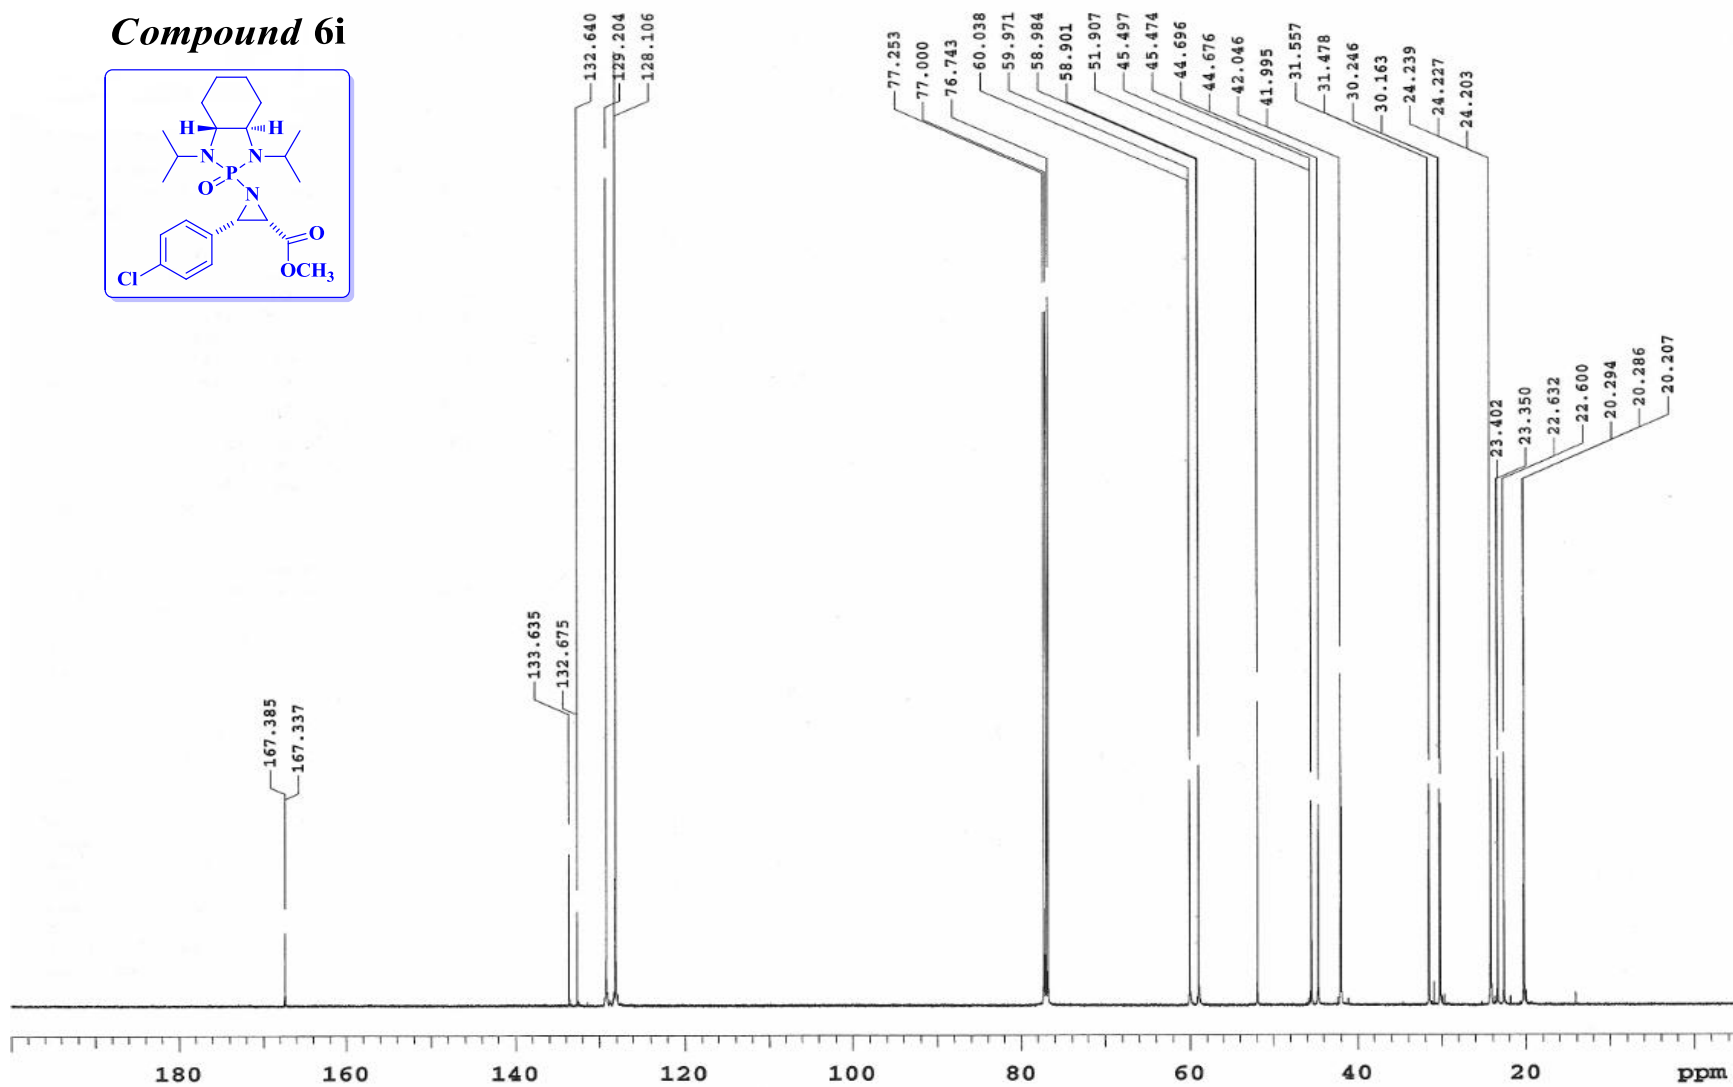

**Compound 6i**

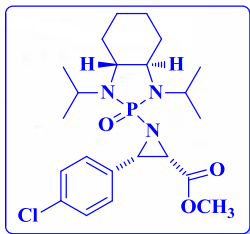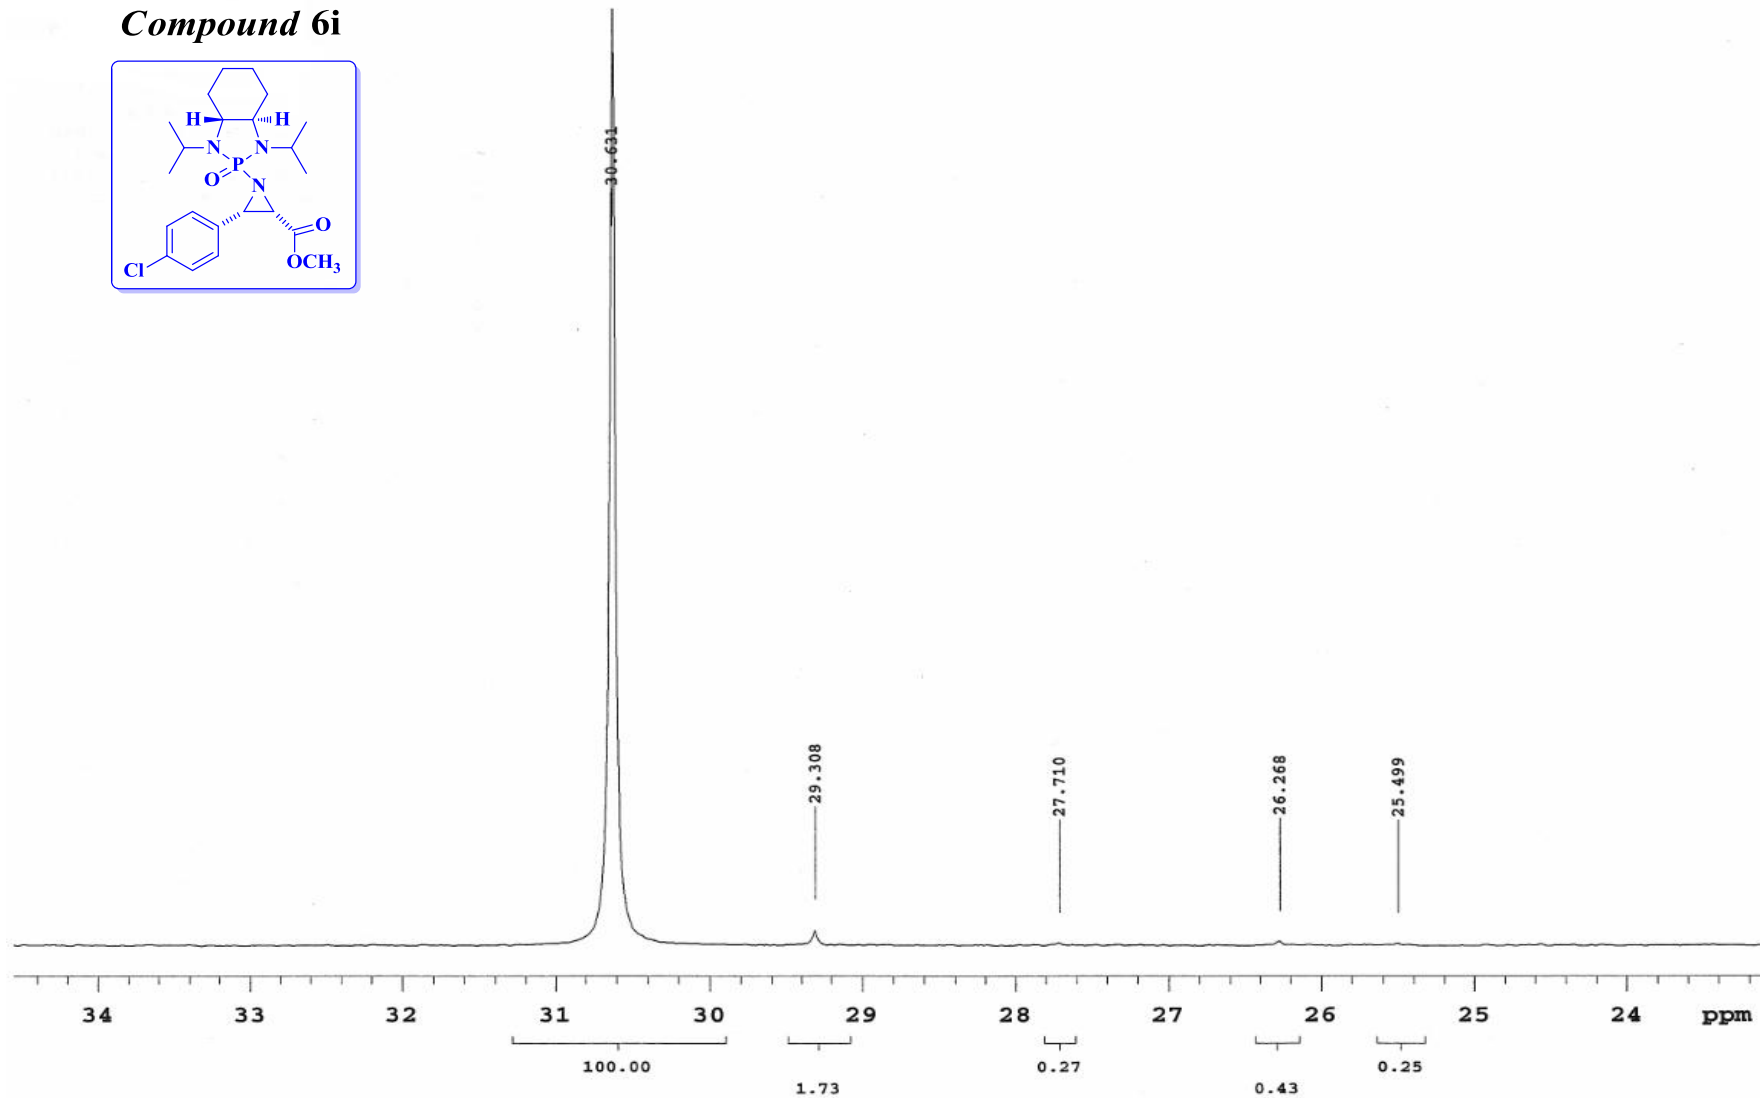



Padmanabha Kattamuri, PVK-D-39

University of Illinois, SCS, Mass Spectrometry Lab

Q-tof UE521

Qtof\_41965 36 (2.578) AM (Cen,5, 80.00, Ar,15000.0,0.00,0.70); Sm (SG, 2x5.00); Cm (36:38-8:13x8.000)

1: TOF MS ES+  
1.85e4

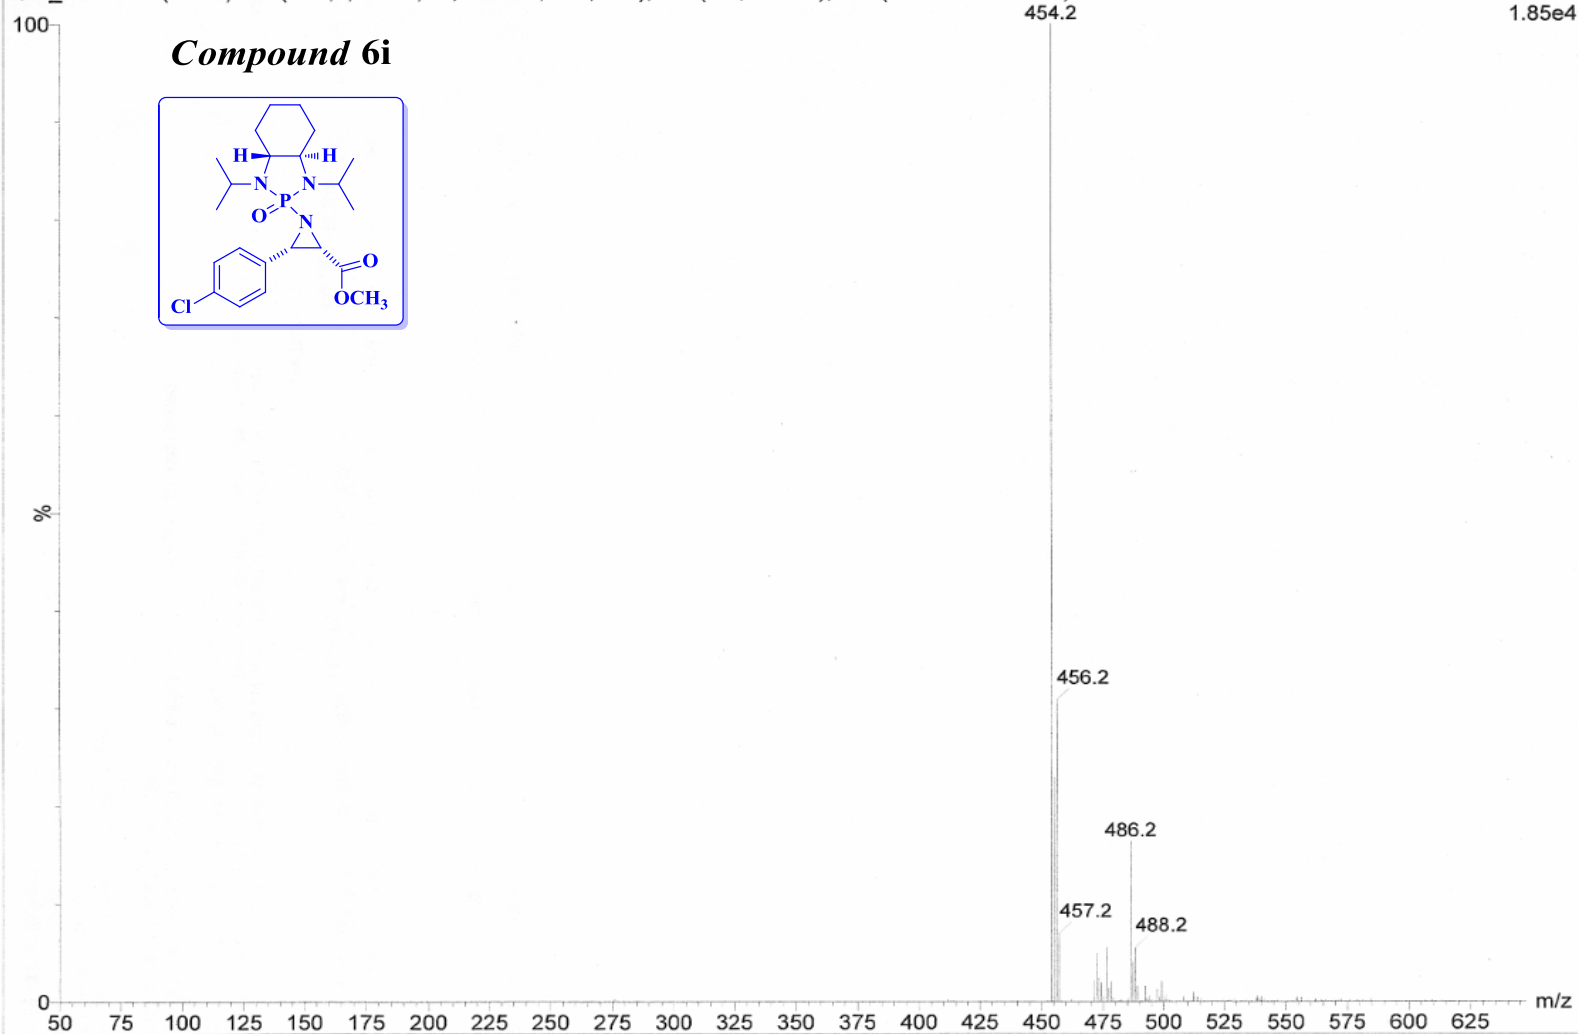

## Elemental Composition Report

Page 1

### Single Mass Analysis

Tolerance = 10.0 PPM / DBE: min = -1.5, max = 600.0

Element prediction: Off

Number of isotope peaks used for i-FIT = 3

### Monoisotopic Mass, Even Electron Ions

87 formula(e) evaluated with 1 results within limits (all results (up to 1000) for each mass)

Elements Used:

C: 0-150 H: 0-250 N: 2-4 O: 2-4 P: 0-1 Cl: 1-1

Padmanabha Kattamuri, PVK-D-39

University of Illinois, SCS, Mass Spectrometry Lab

Q-tof UE521

Qtof\_41965 51 (3.650) AM (Cen,3, 80.00, Ar,15000.0,716.46,0.70,LS 3); Sm (SG, 2x3.00); Cm (51:54)

1: TOF MS ES+  
2.55e+003

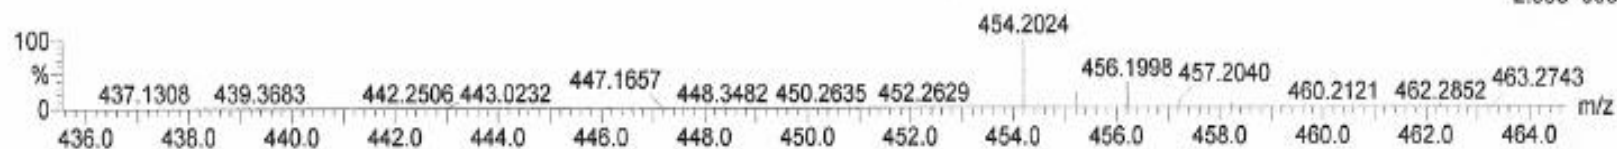

Minimum:

-1.5

Maximum:

5.0

10.0

600.0

| Mass     | Calc. Mass | mDa  | PPM  | DBE | i-FIT | Formula            |
|----------|------------|------|------|-----|-------|--------------------|
| 454.2024 | 454.2026   | -0.2 | -0.4 | 7.5 | 4.8   | C22 H34 N3 O3 P Cl |

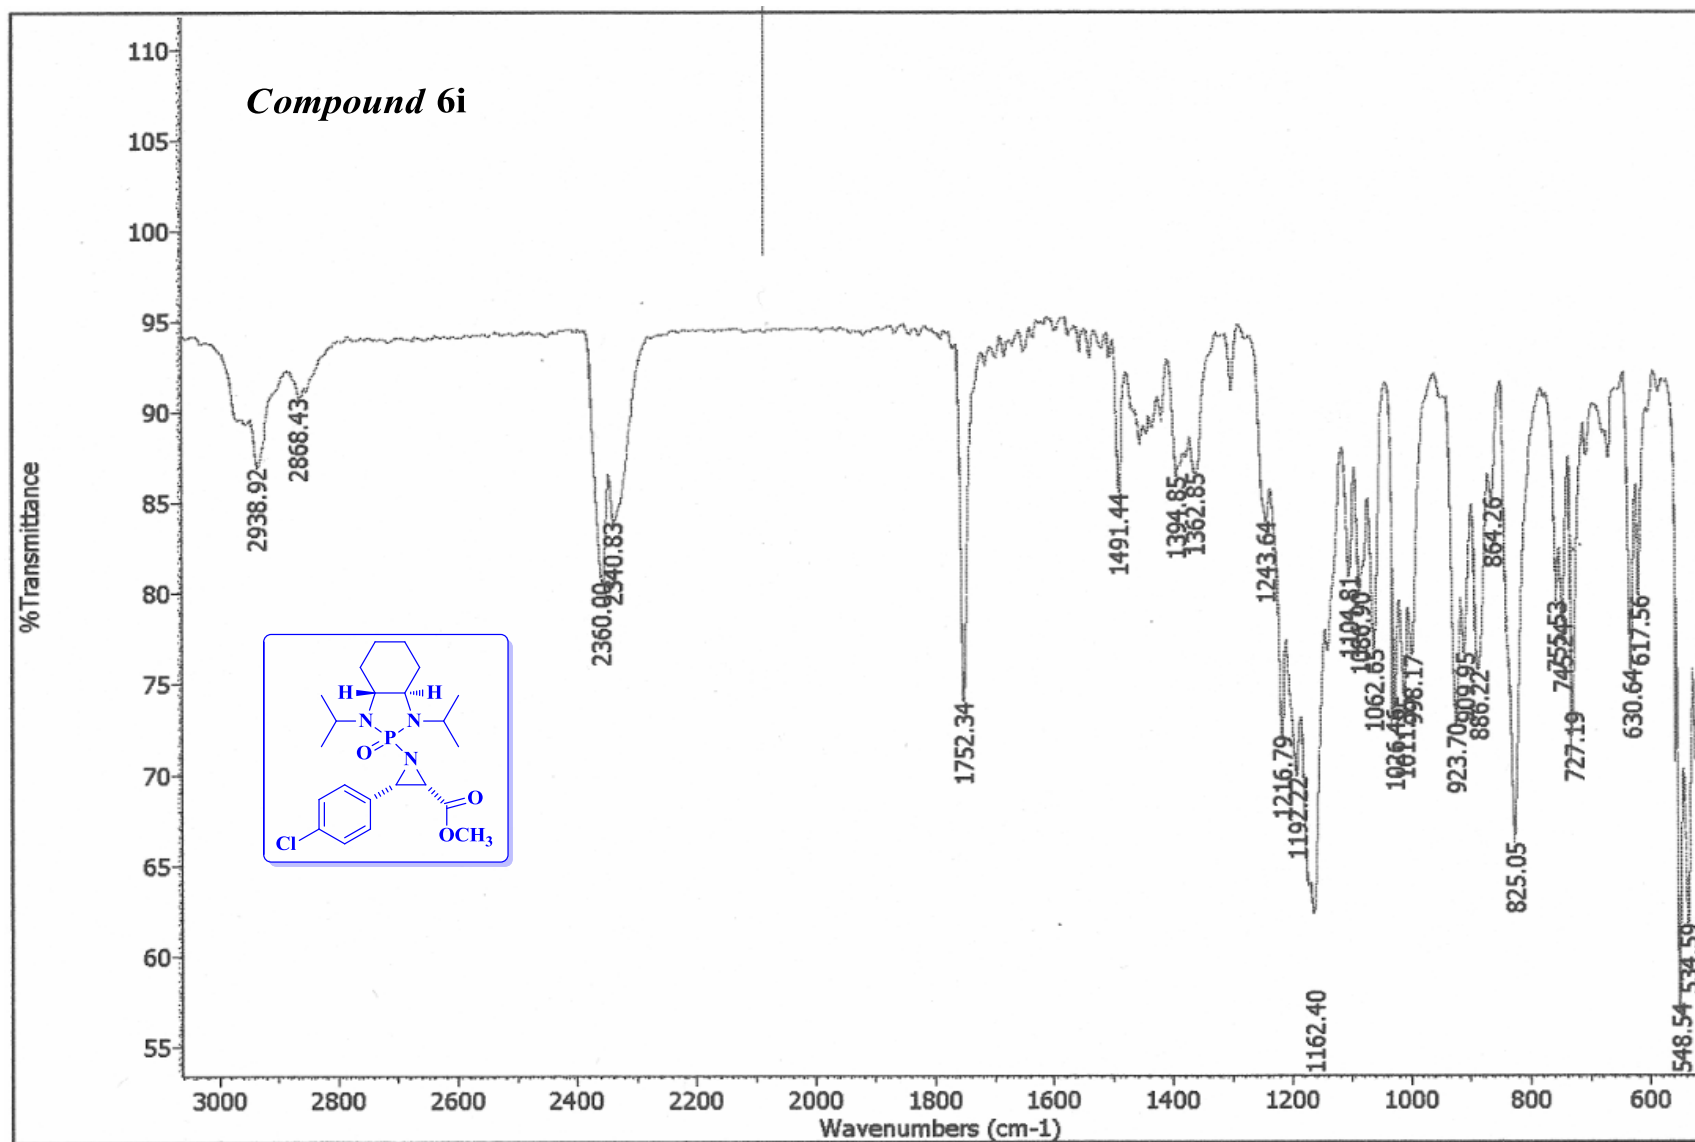

### Compound 6j

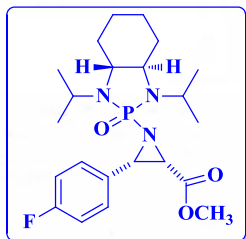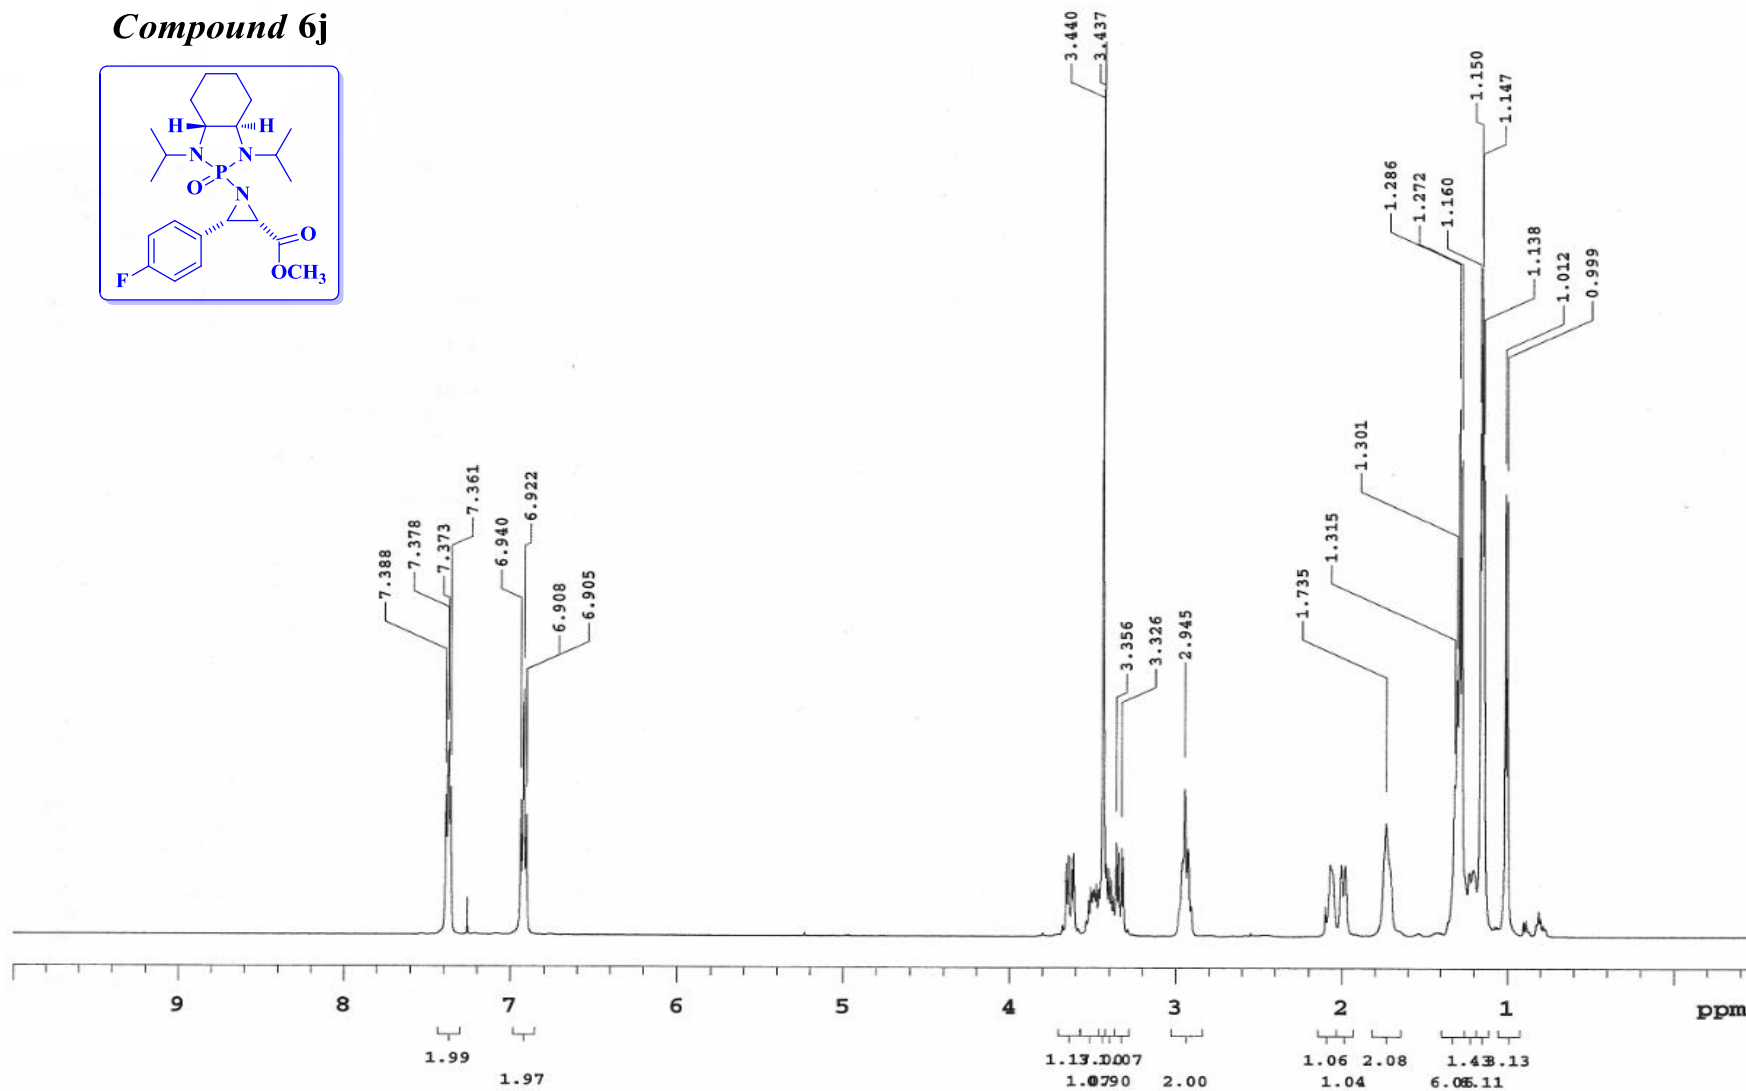

**Compound 6j**

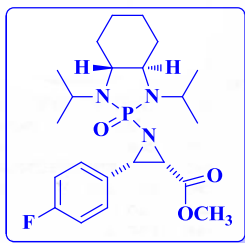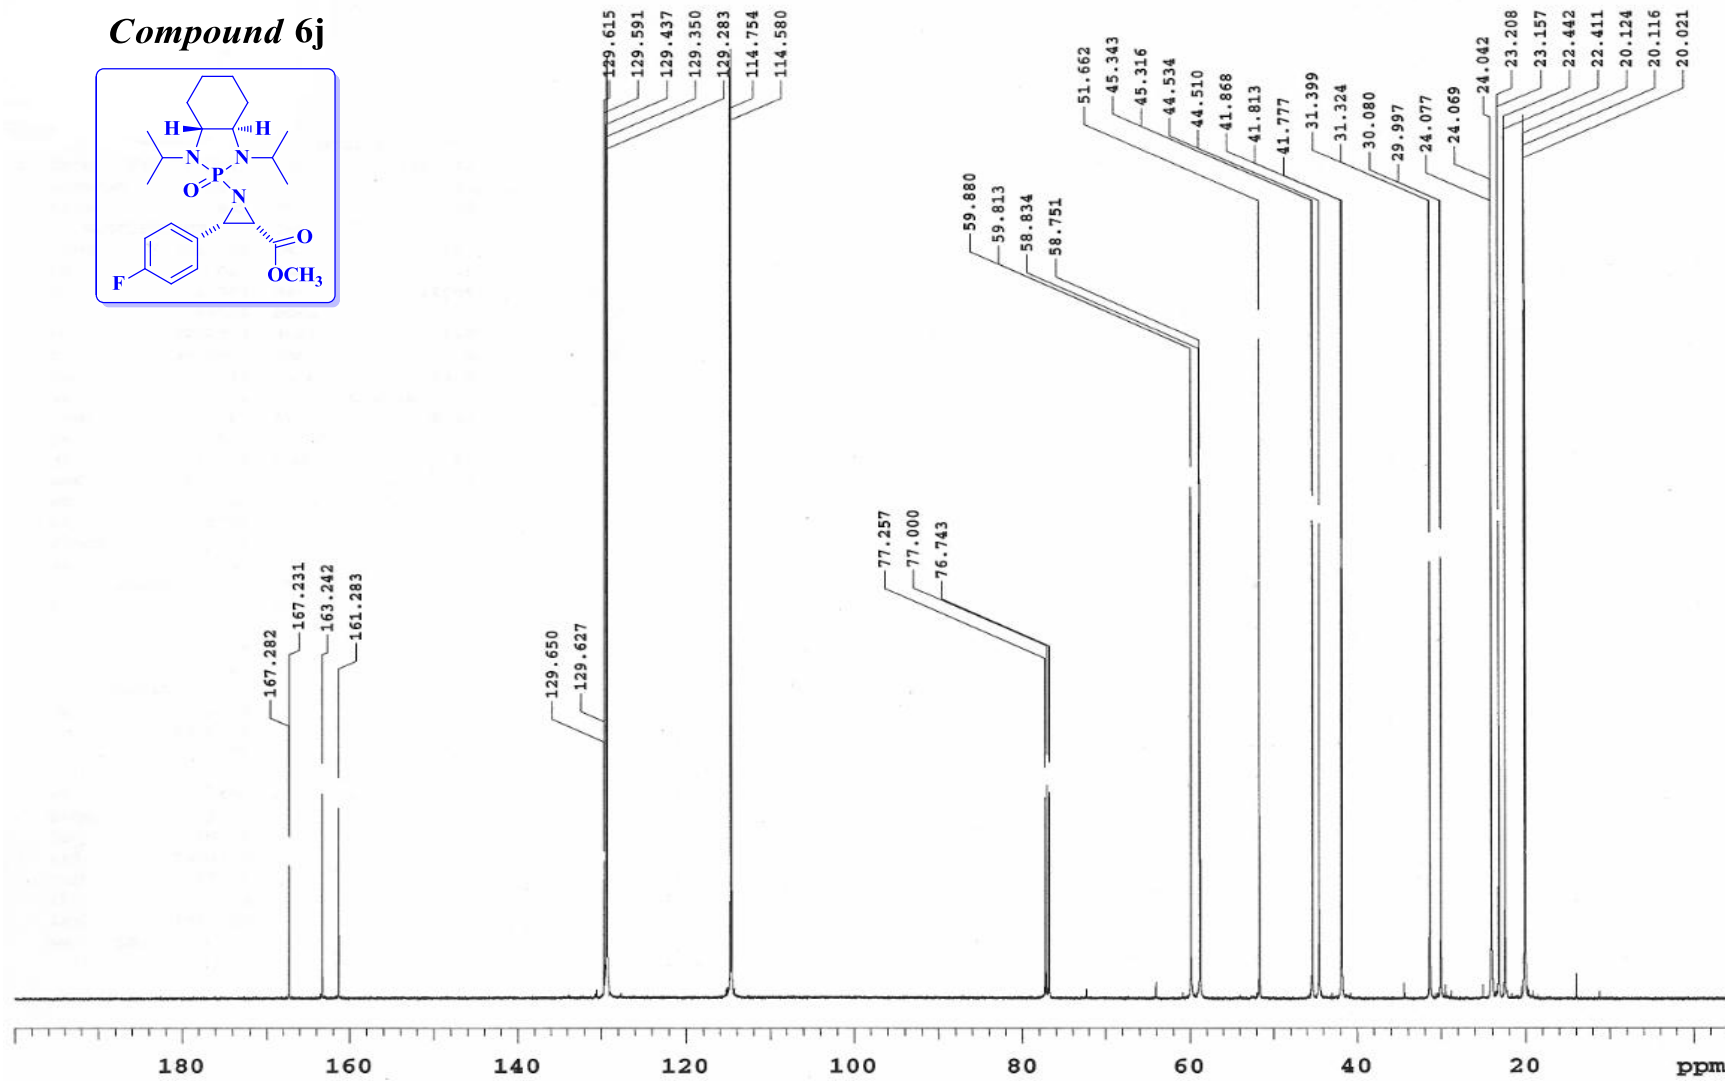

**Compound 6j**

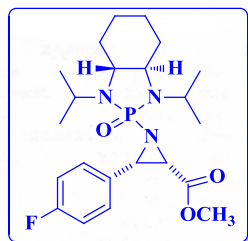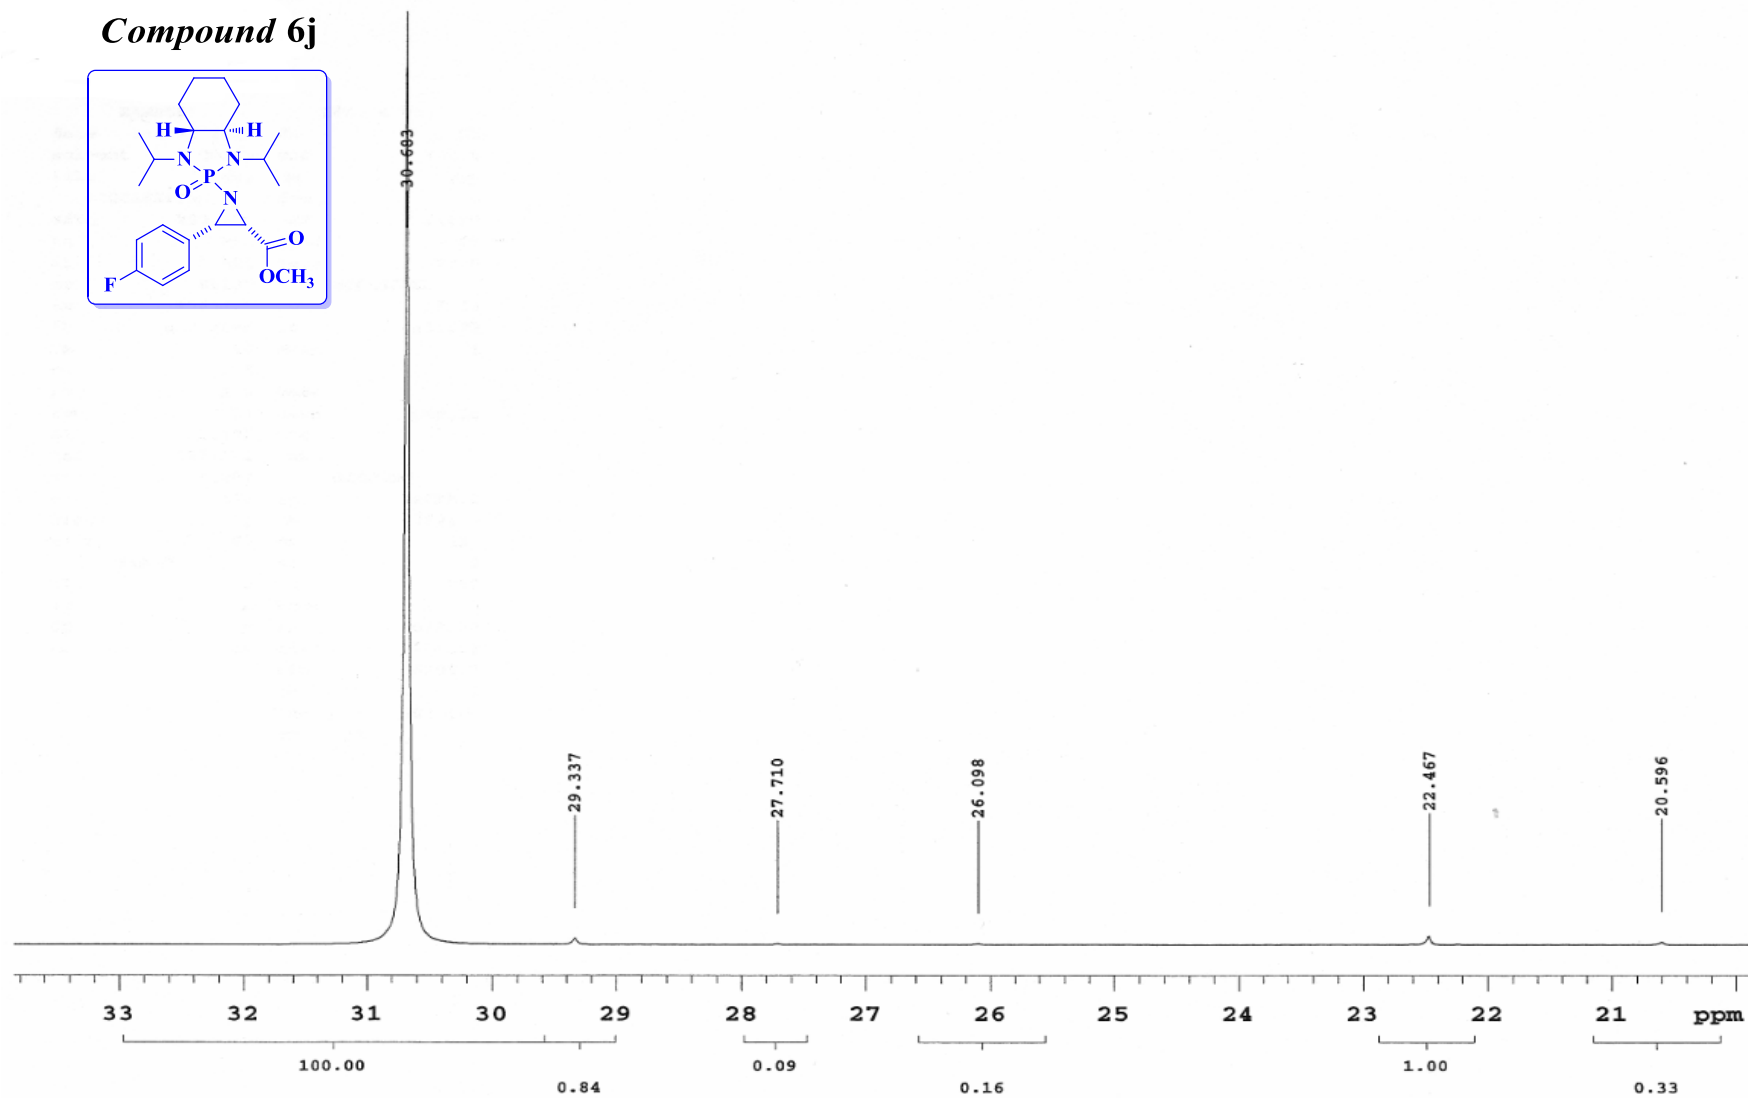

**Compound 6j**

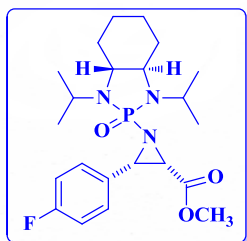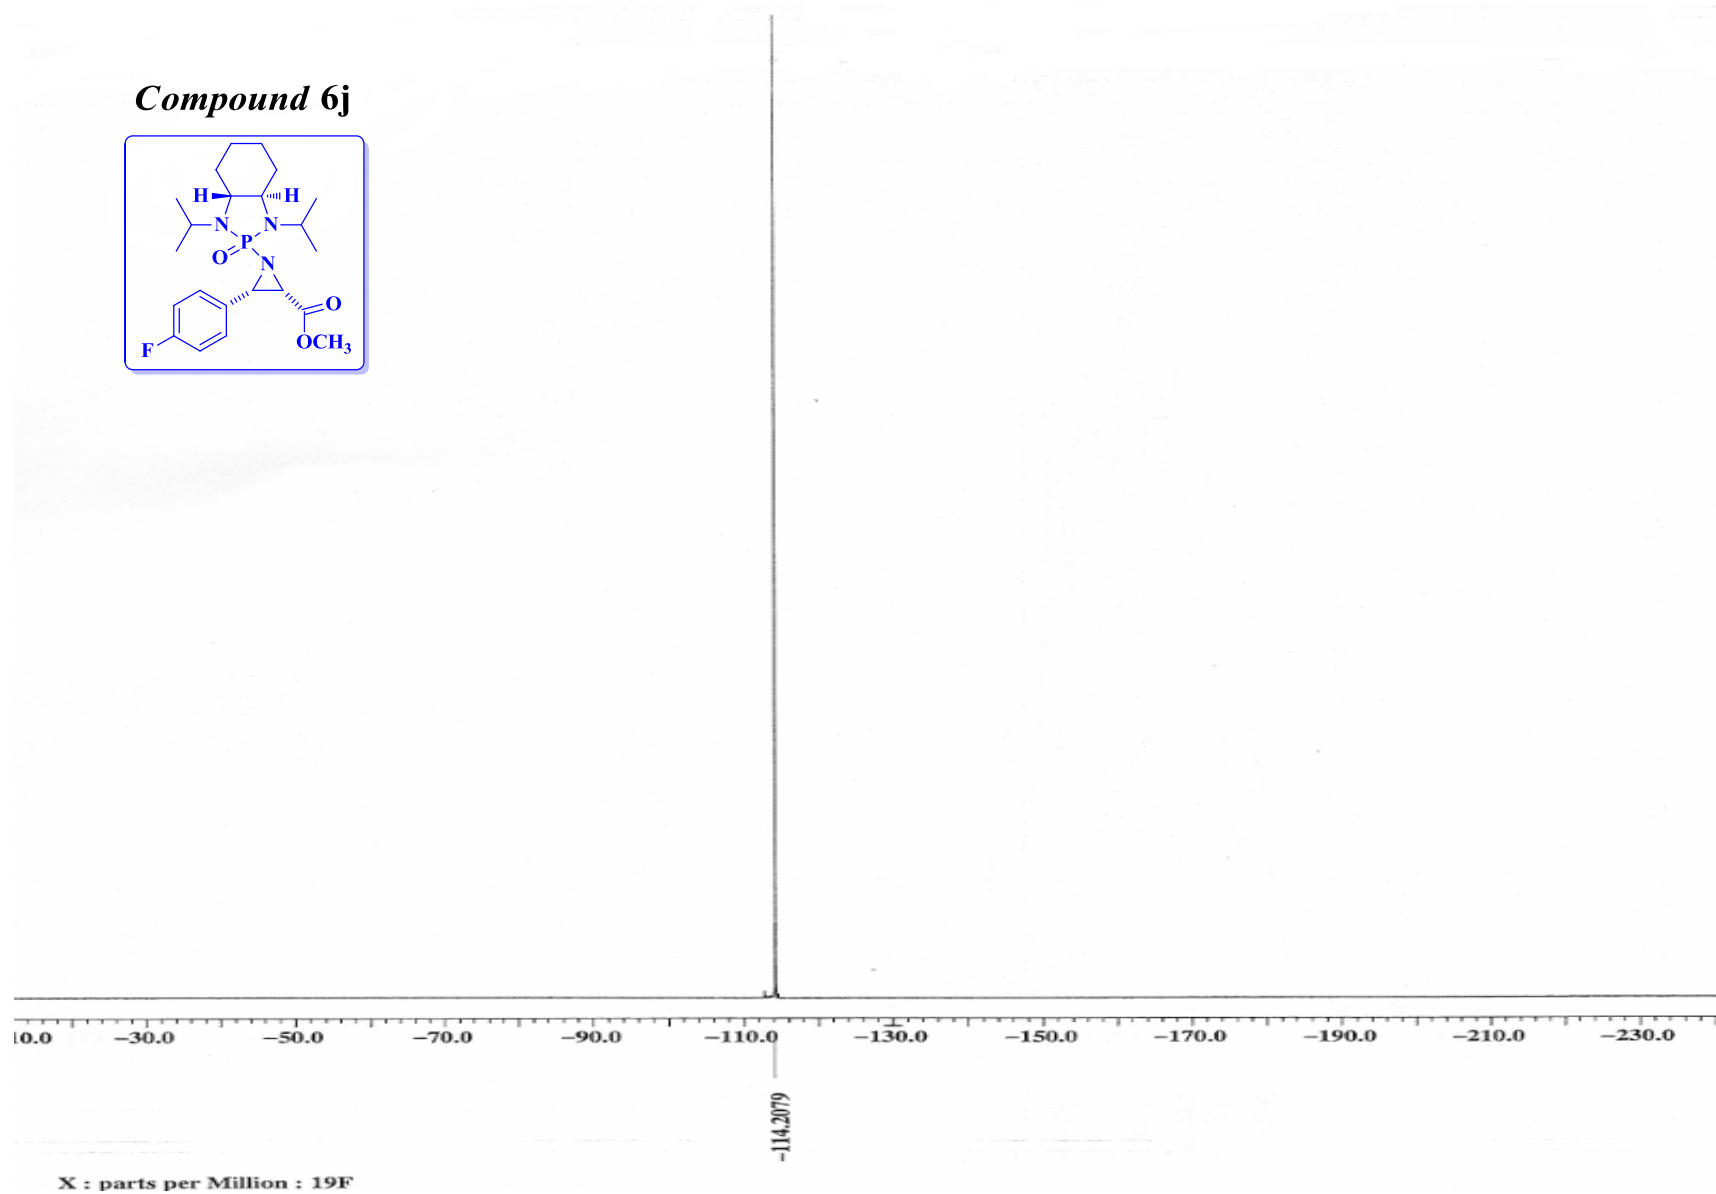

Padmanabha Kattamuri, PVK-D-41

University of Illinois, SCS, Mass Spectrometry Lab

Q-tof UE521

Qtof\_41966 36 (2.593) AM (Cen,5, 80.00, Ar,15000.0,0.00,0.70); Sm (SG, 2x5.00); Cm (36-7x8.000)

1: TOF MS ES+  
9.07e3

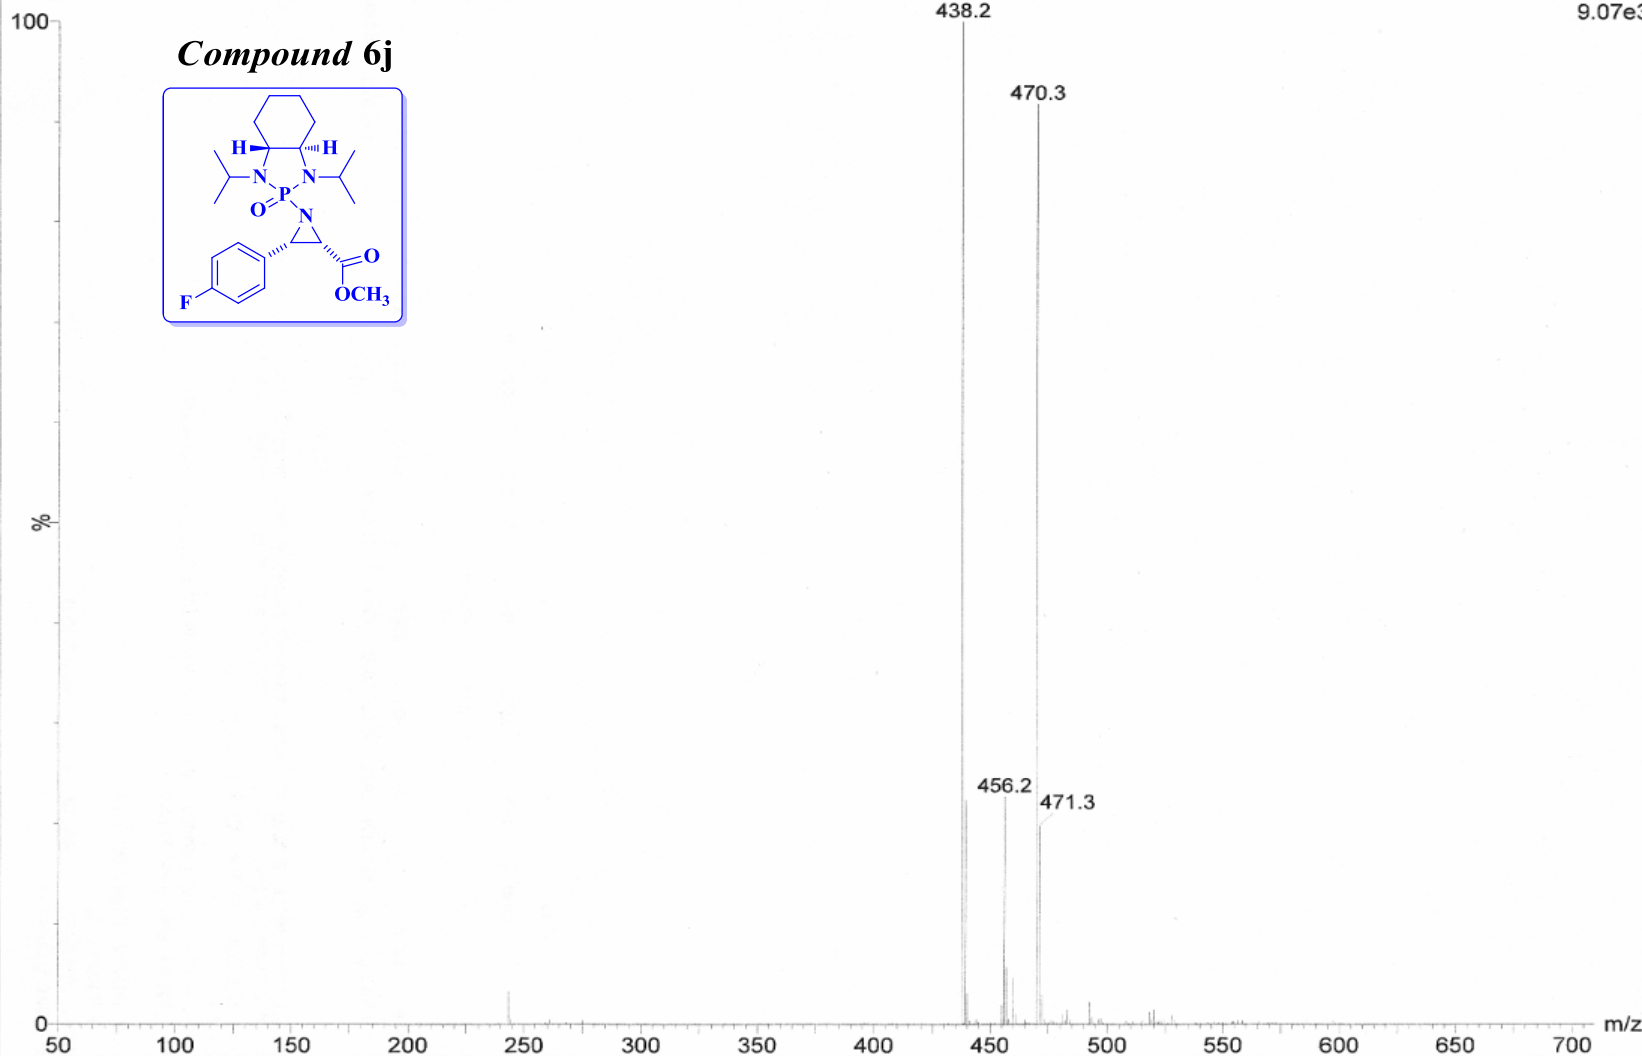



## Elemental Composition Report

Page 1

### Single Mass Analysis

Tolerance = 10.0 PPM / DBE: min = -1.5, max = 600.0

Element prediction: Off

Number of isotope peaks used for i-FIT = 3

### Monoisotopic Mass, Even Electron Ions

87 formula(e) evaluated with 1 results within limits (all results (up to 1000) for each mass)

Elements Used:

C: 0-150 H: 0-250 N: 2-4 O: 2-4 F: 1-1 P: 0-1

Padmanabha Kattamuri, PVK-D-41

University of Illinois, SCS, Mass Spectrometry Lab

Qtof\_41966 32 (2.271) AM (Cen,3, 80.00, Ar,15000.0,716.46,0.70); Sm (SG, 2x3.00); Cm (30:33)

Q-tof UE521

2: TOF MS ES+

1.54e+003

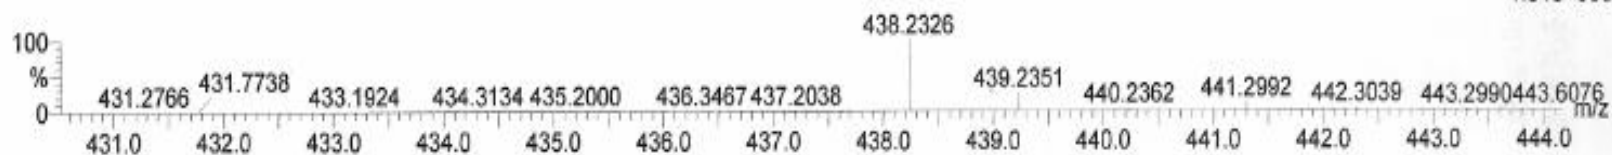

Minimum: -1.5  
Maximum: 5.0 10.0 600.0

| Mass     | Calc. Mass | mDa | PPM | DBE | i-FIT | Formula           |
|----------|------------|-----|-----|-----|-------|-------------------|
| 438.2326 | 438.2322   | 0.4 | 0.9 | 7.5 | 3.2   | C22 H34 N3 O3 F P |

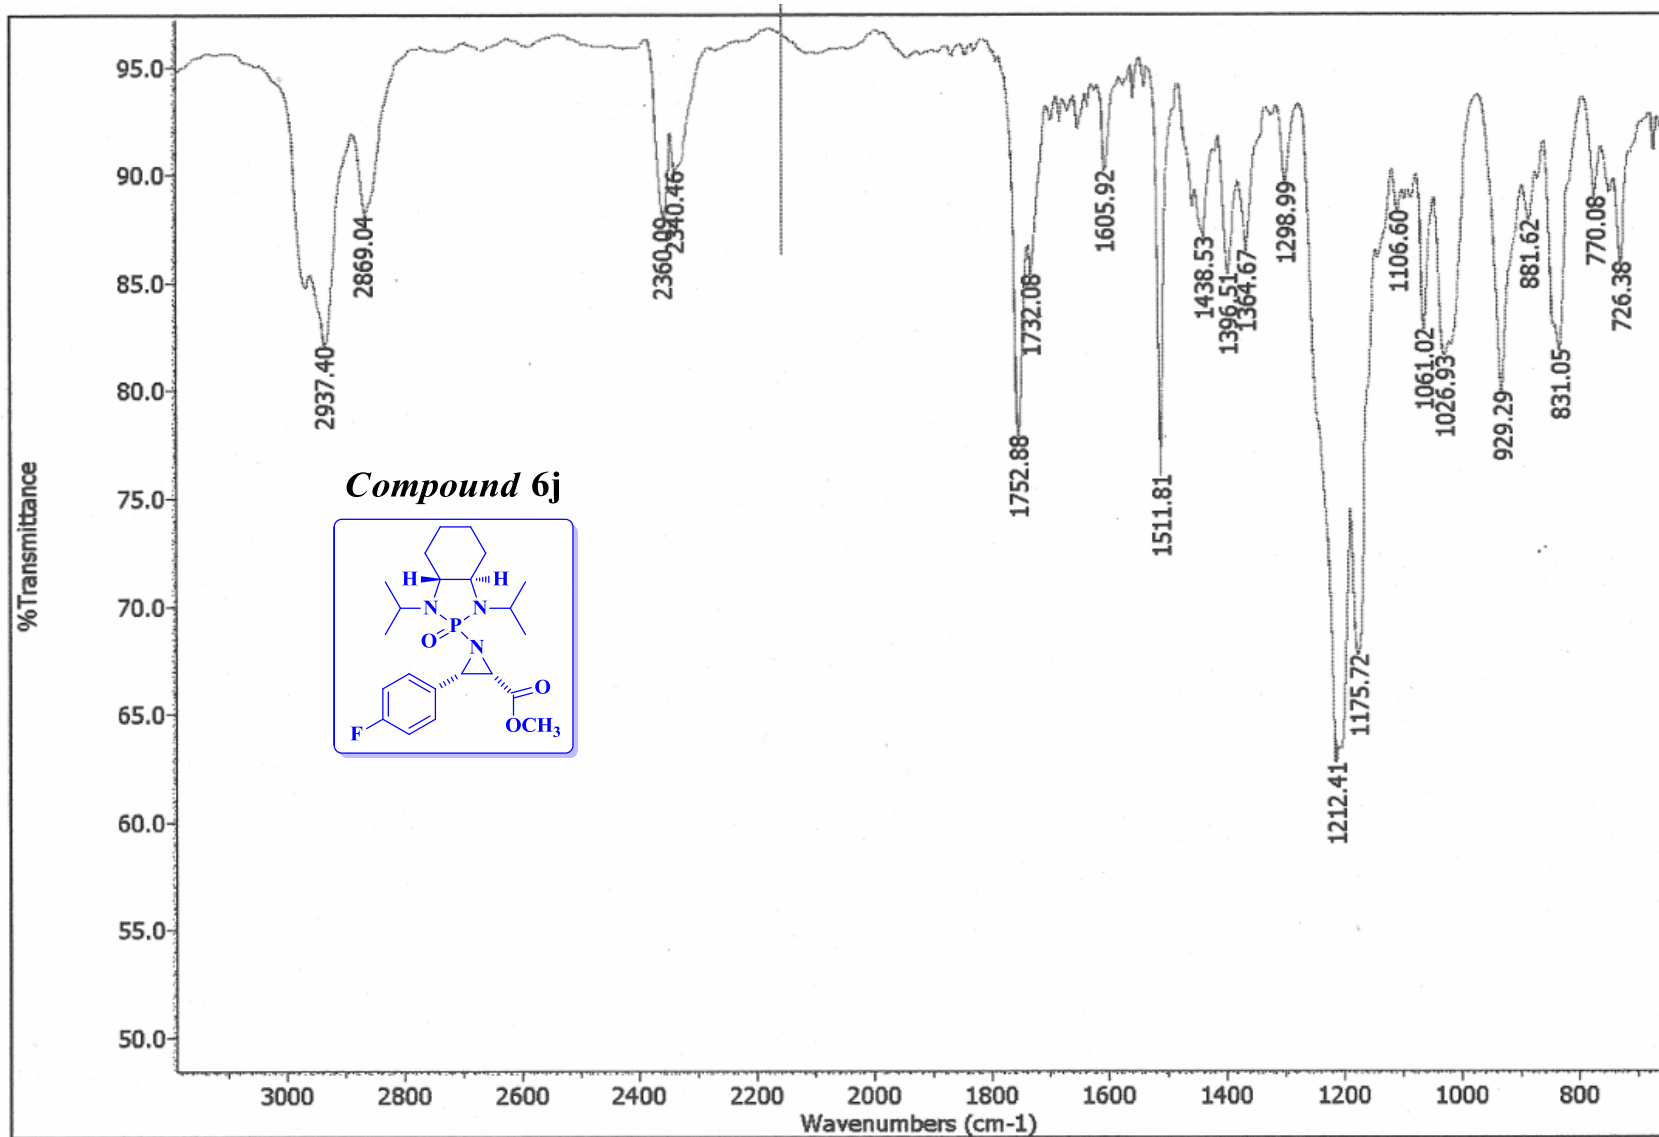

### Compound 6k

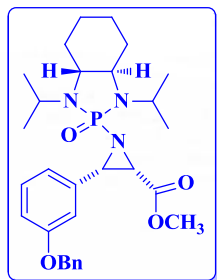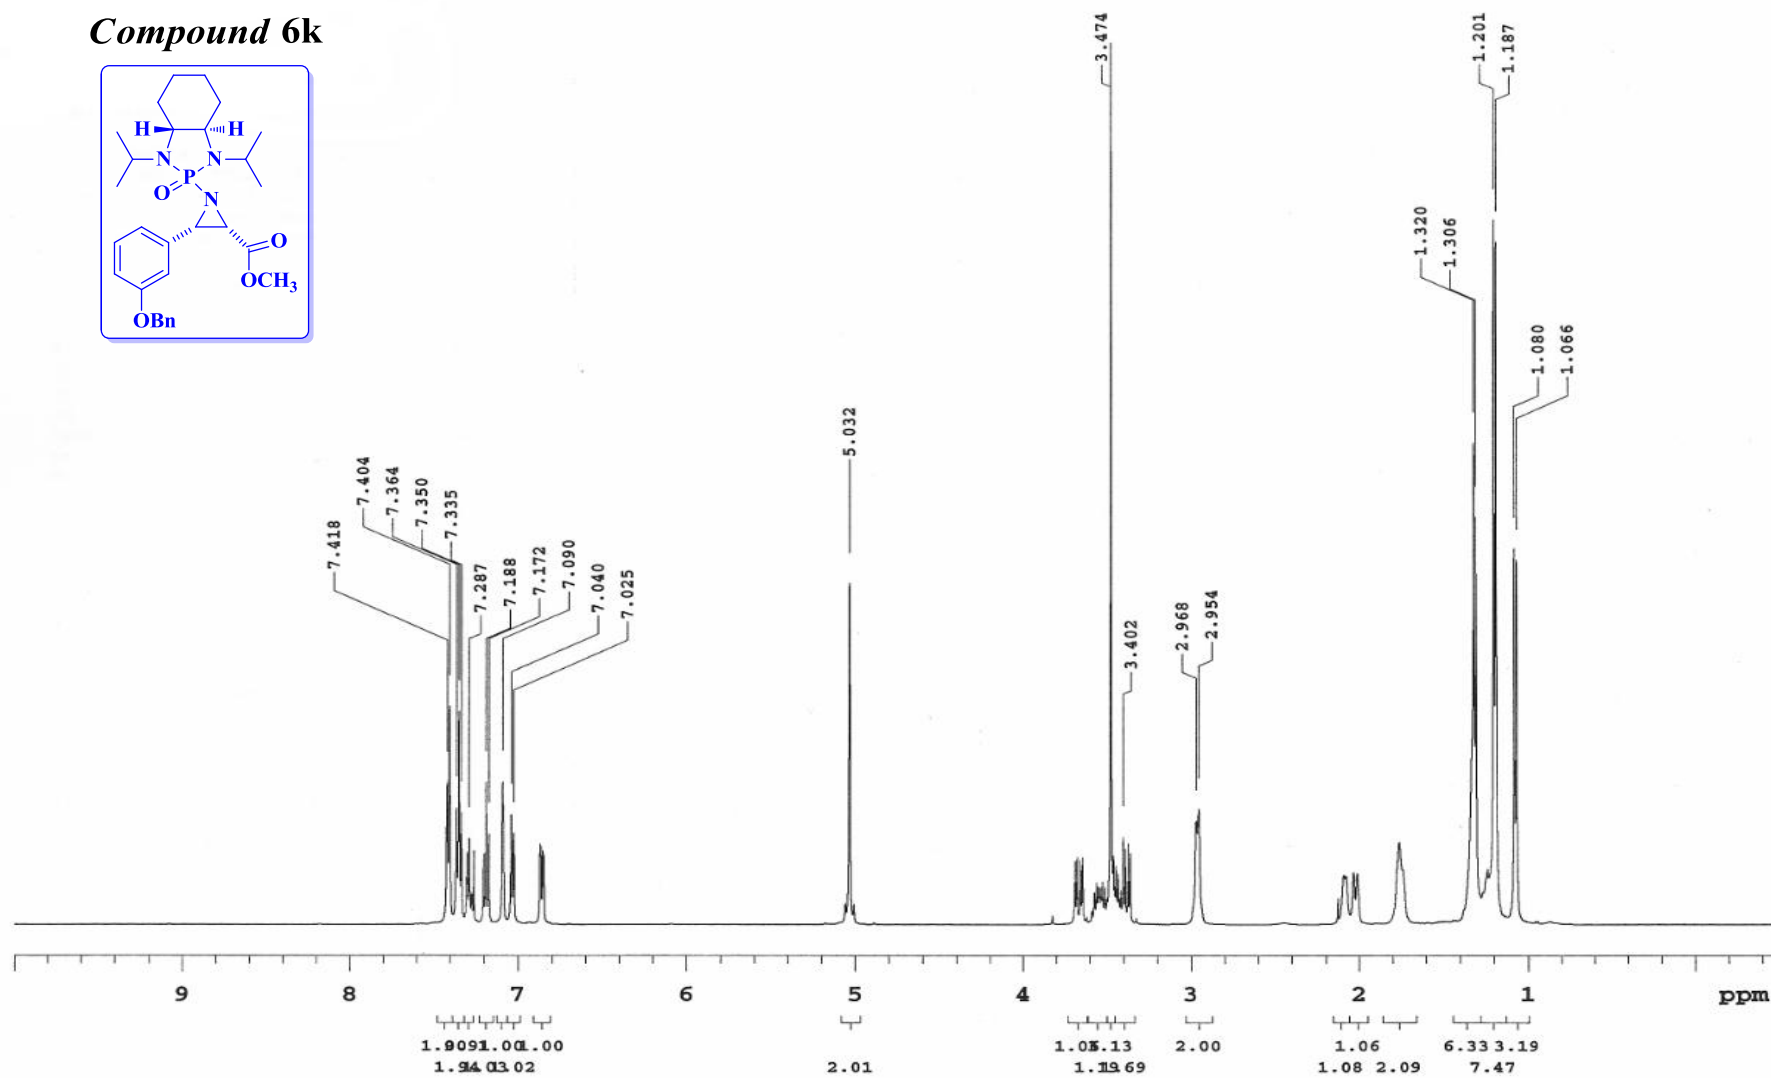

### Compound 6k

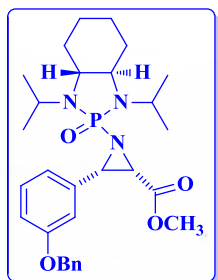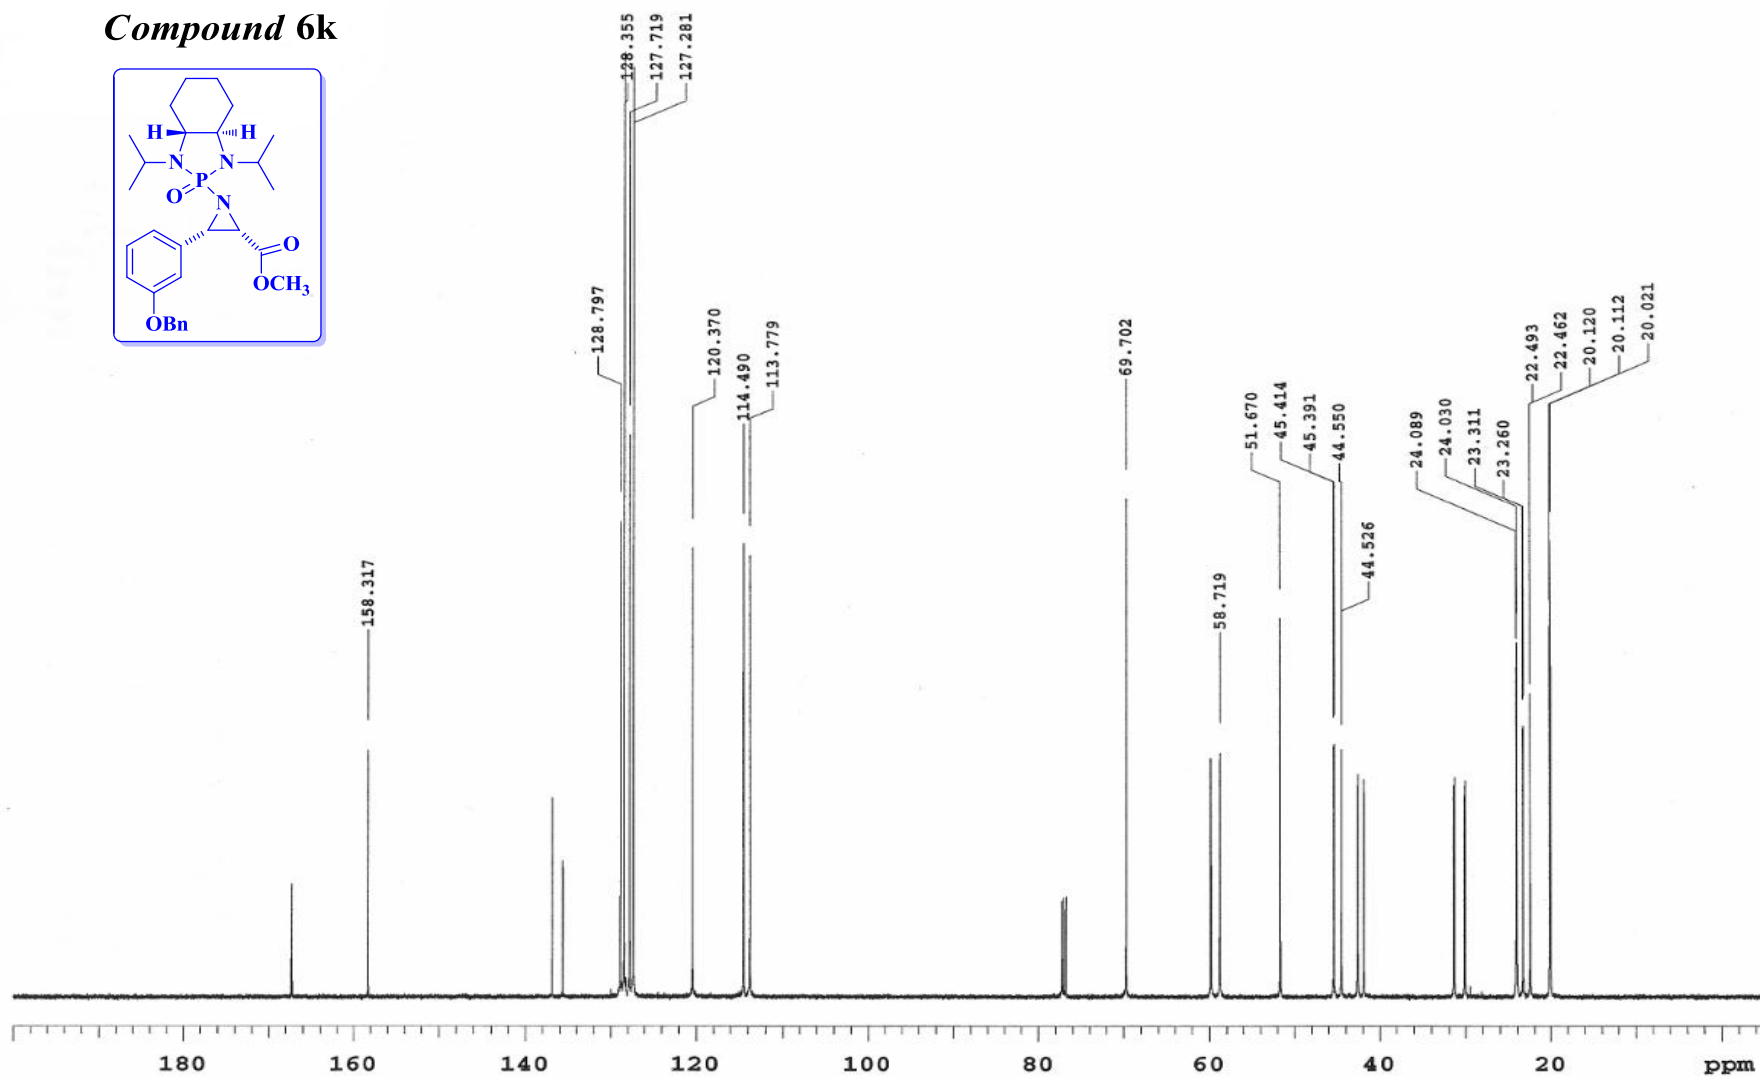

**Compound 6k**

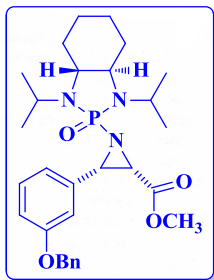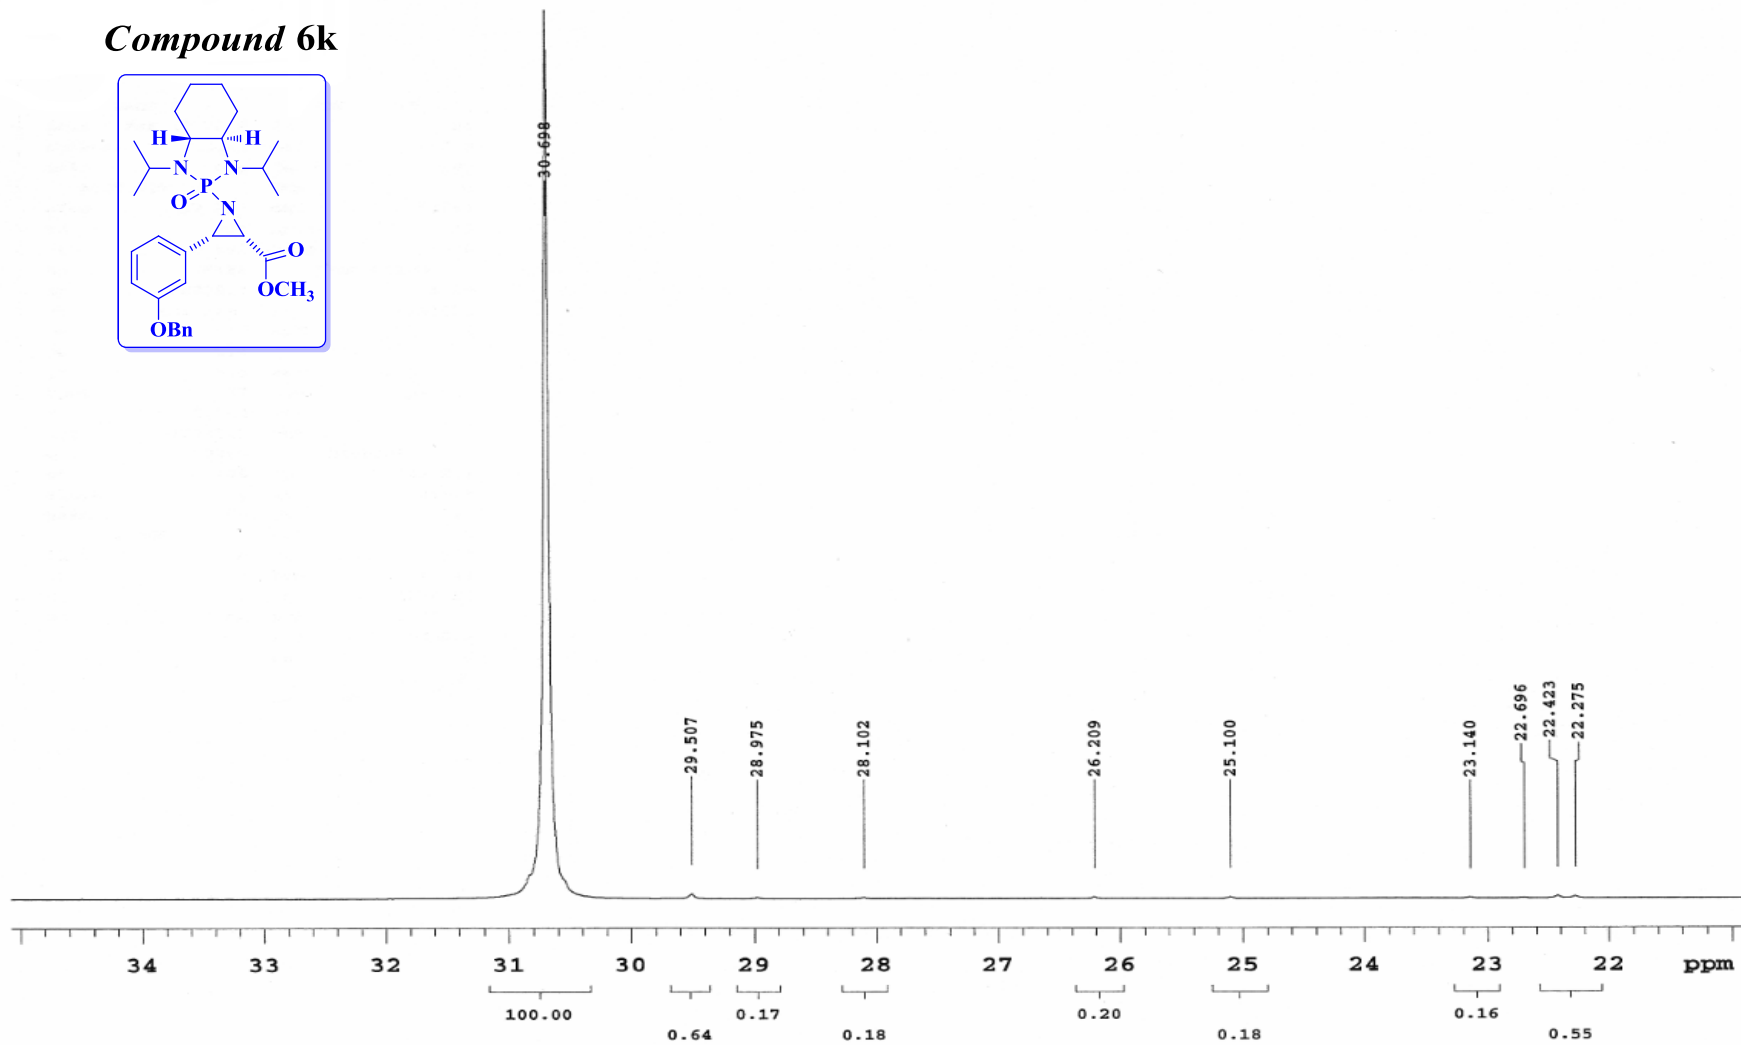

Padmanabha Kattamuri, PVK-D-57 University of Illinois, SCS, Mass Spectrometry Lab

Qtof\_41969 38 (2.721) AM (Cen,5, 80.00, Ar,15000.0,0.00,0.70); Sm (SG, 2x5.00); Cm (38:39-7:11x8.000)

Q-tof UE521

1: TOF MS ES+

1.89e4

**Compound 6k**

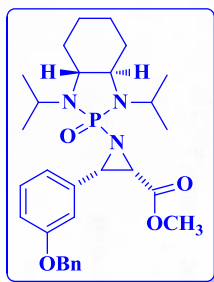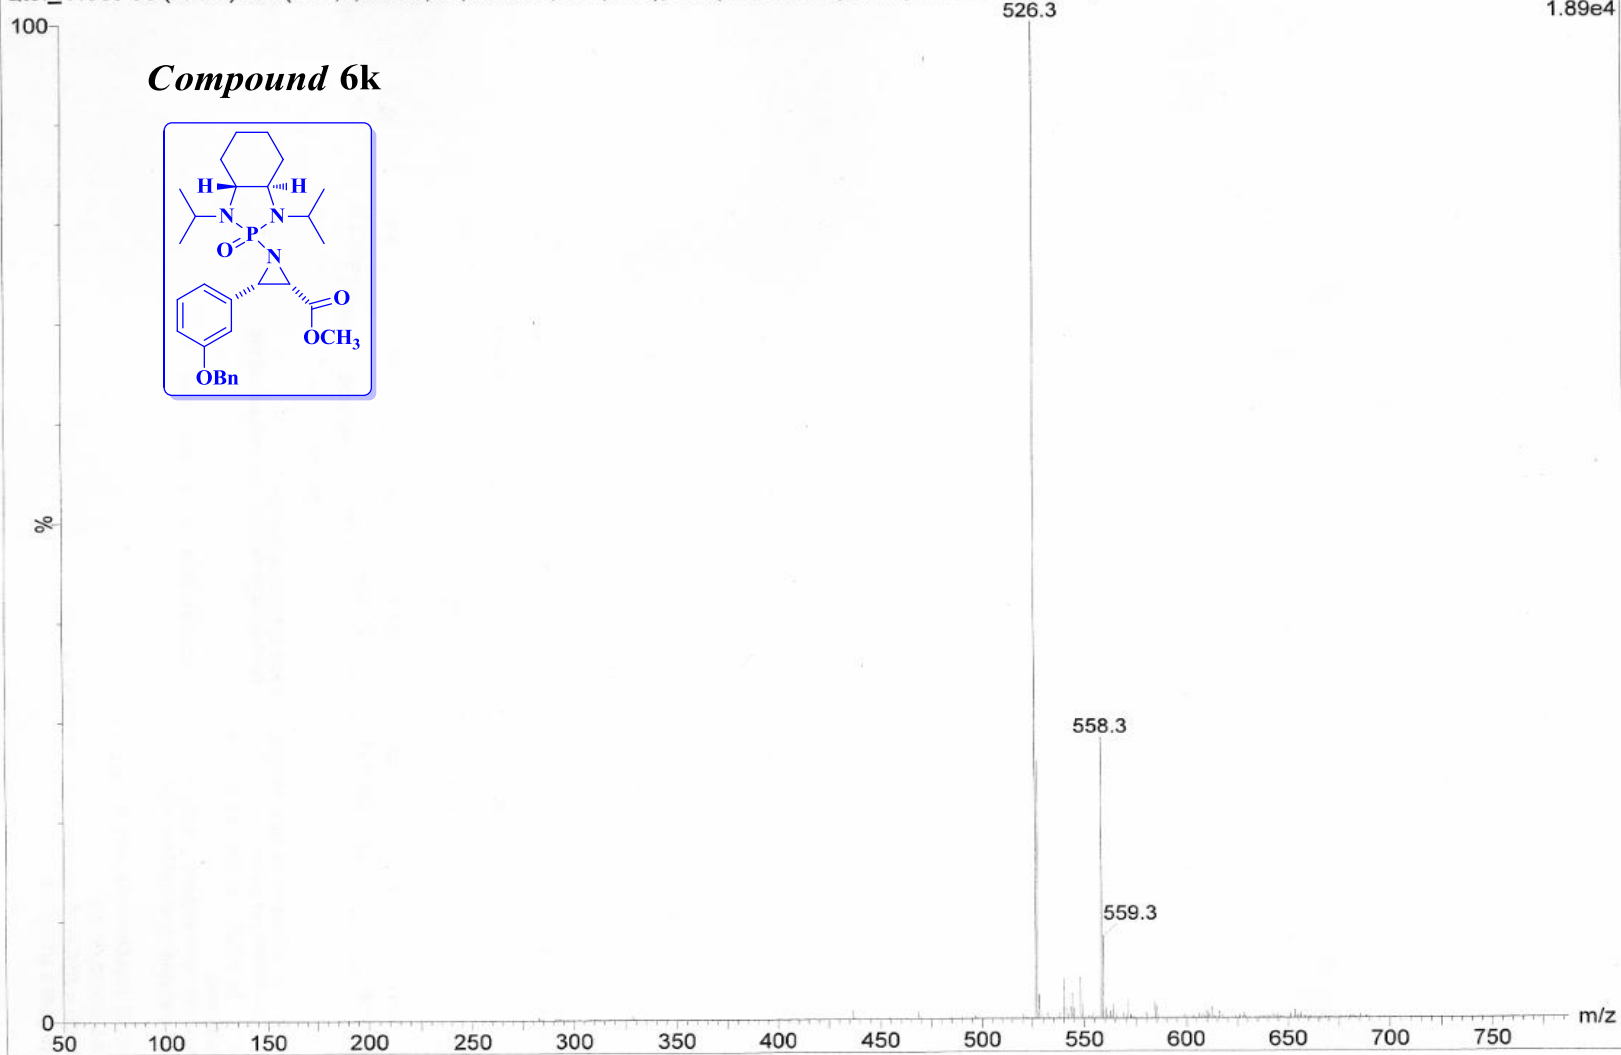

## Elemental Composition Report

Page 1

### Single Mass Analysis

Tolerance = 10.0 PPM / DBE: min = -1.5, max = 600.0

Element prediction: Off

Number of isotope peaks used for i-FIT = 3

Monoisotopic Mass, Even Electron Ions

115 formula(e) evaluated with 1 results within limits (all results (up to 1000) for each mass)

Elements Used:

C: 0-150 H: 0-250 N: 2-4 O: 2-4 P: 0-1

Padmanabha Kattamuri, PVK-D-57

University of Illinois, SCS, Mass Spectrometry Lab

Qtof\_41969 51 (3.650) AM (Cen,3, 80.00, Ar,15000.0,716.46,0.70,LS 3); Sm (SG, 2x3.00)

Q-tof UE521  
1: TOF MS ES+  
9.13e+002

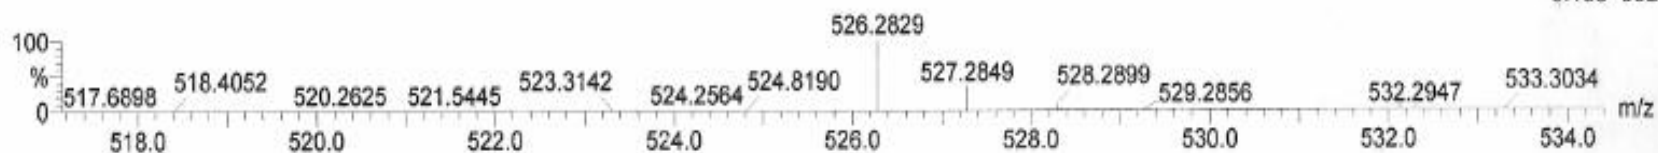

Minimum: -1.5  
Maximum: 5.0 10.0 600.0

| Mass     | Calc. Mass | mDa  | PPM  | DBE  | i-FIT | Formula         |
|----------|------------|------|------|------|-------|-----------------|
| 526.2829 | 526.2835   | -0.6 | -1.1 | 11.5 | 0.6   | C29 H41 N3 O4 P |

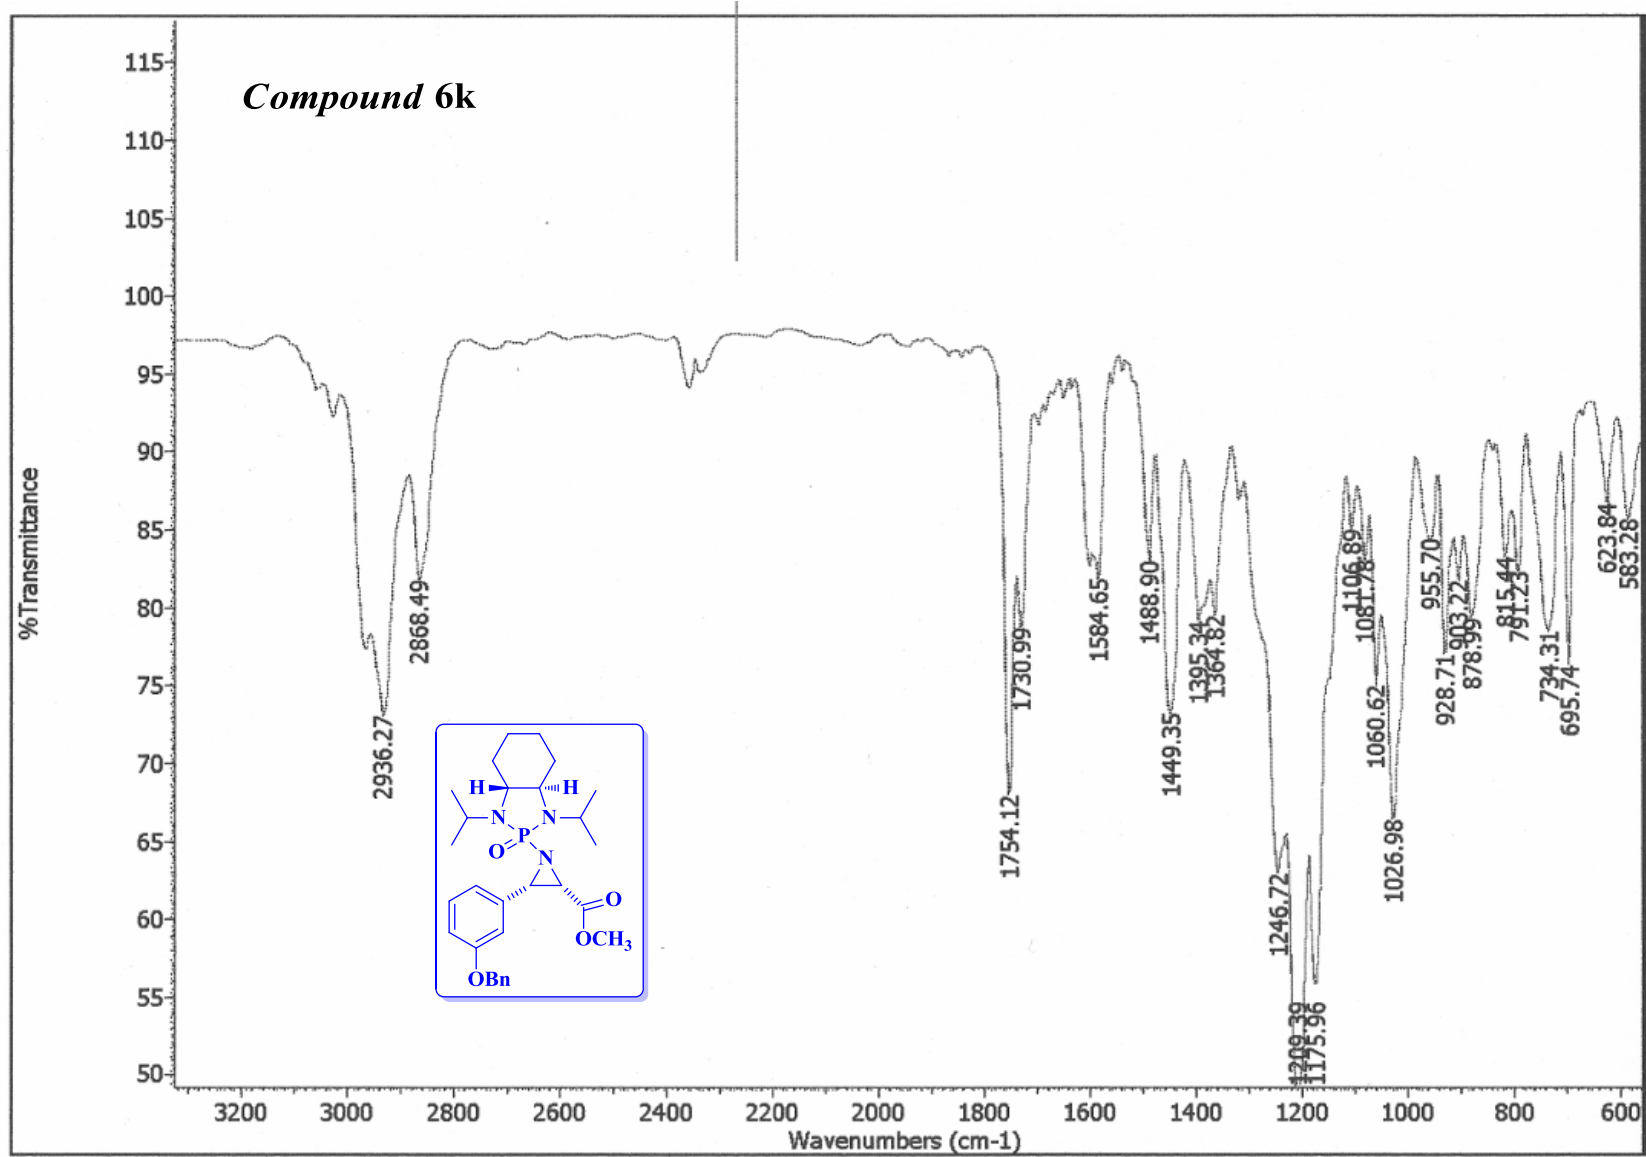



### Compound 6l

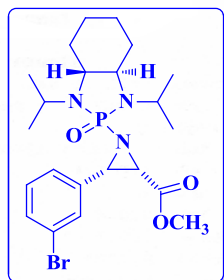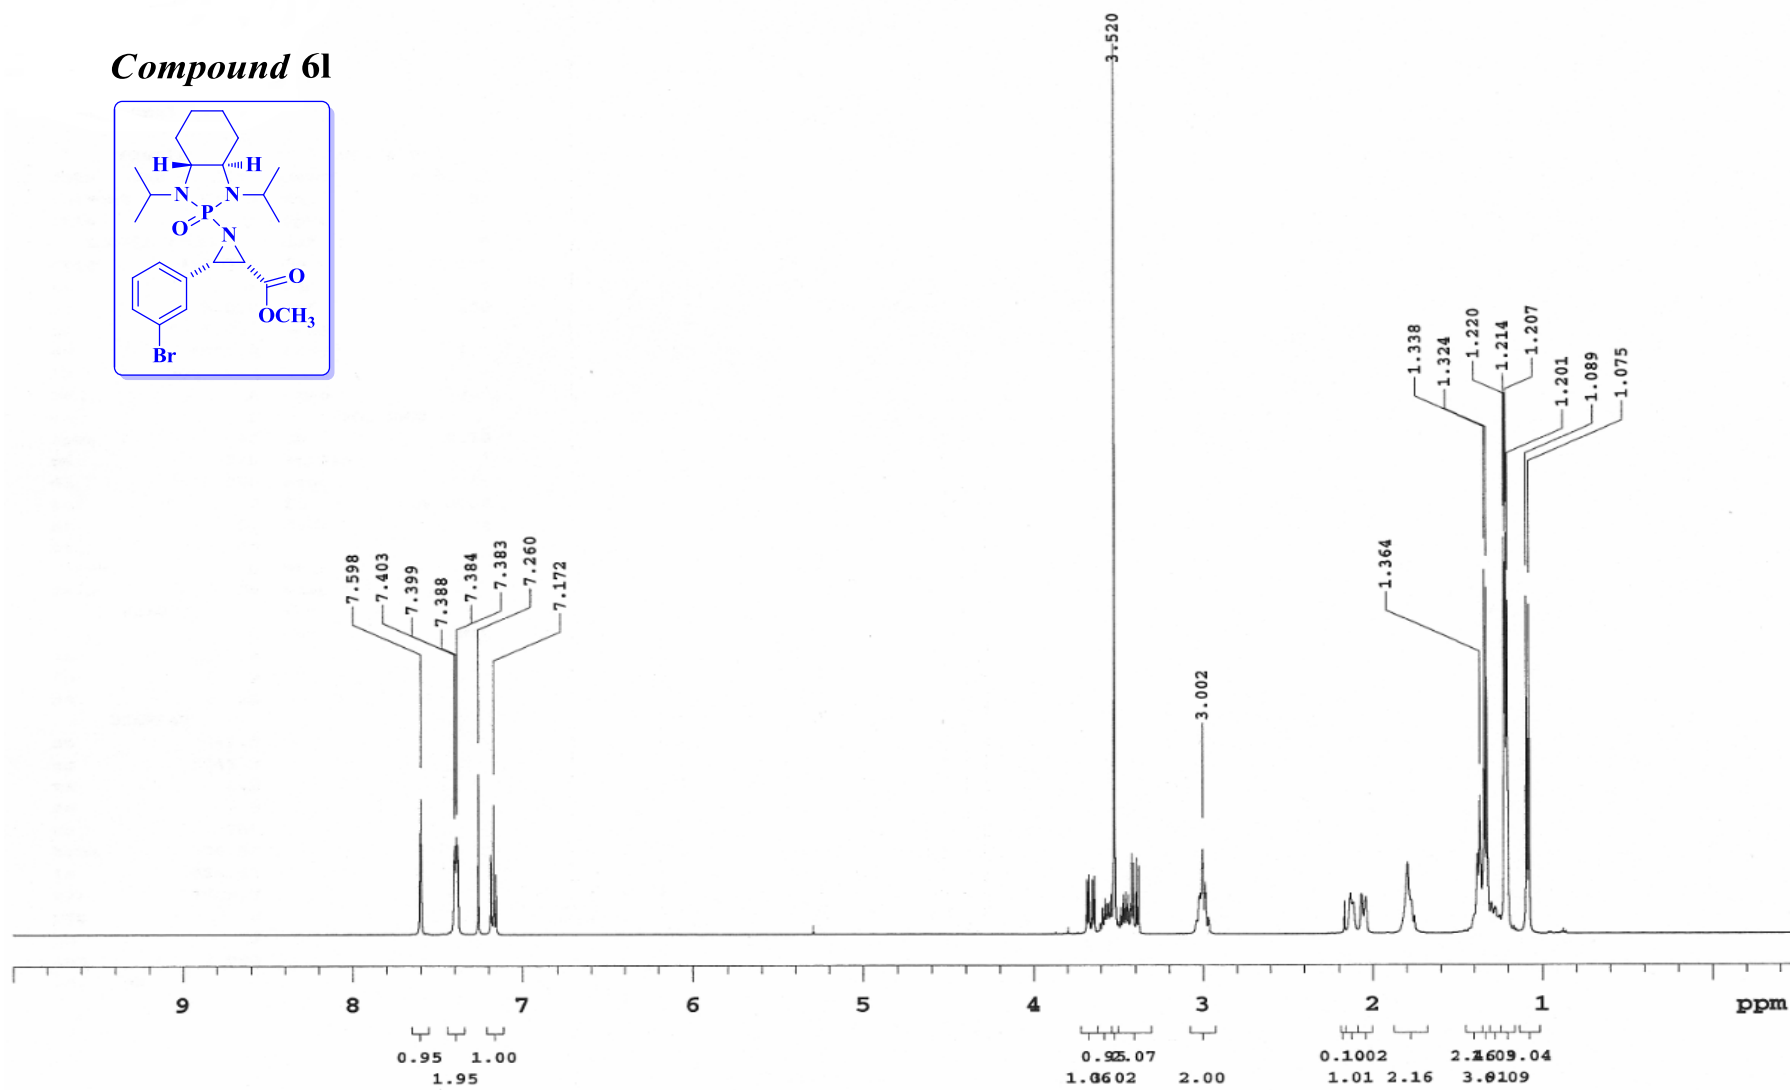

**Compound 6l**

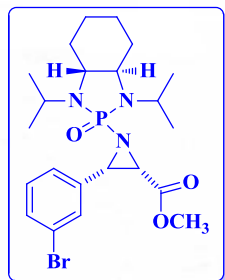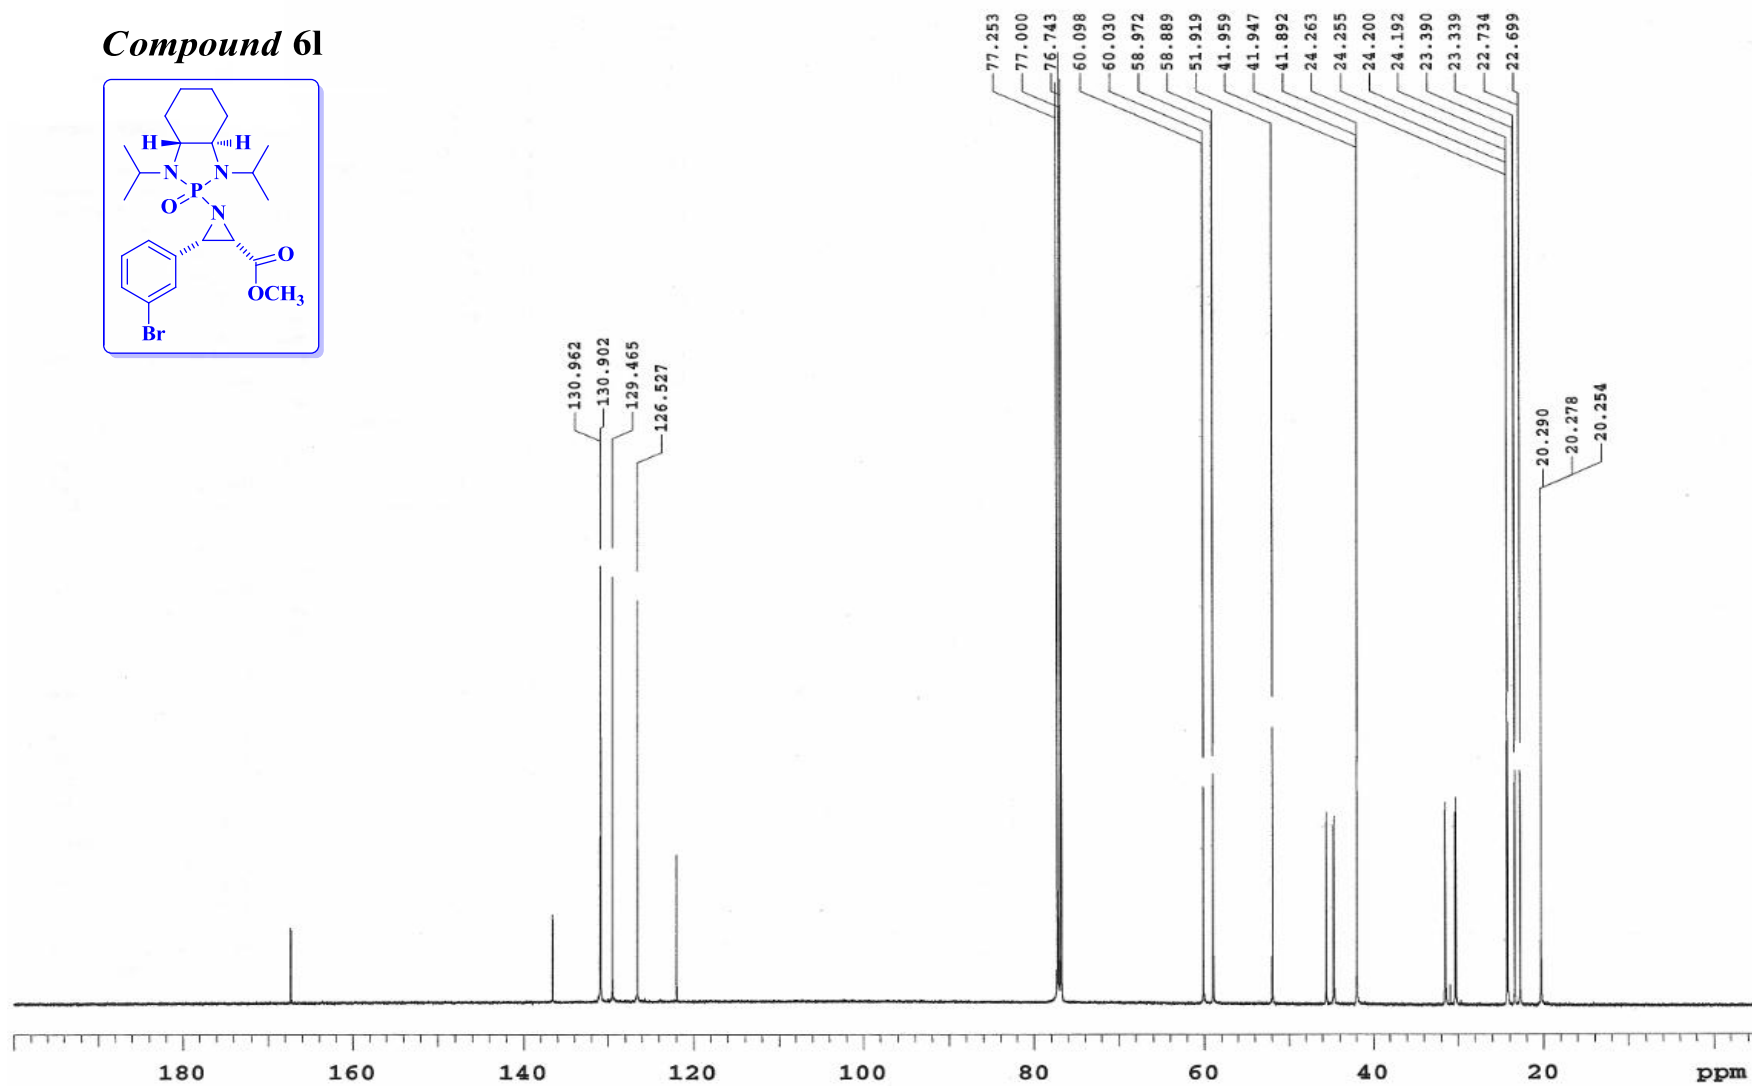

**Compound 6l**

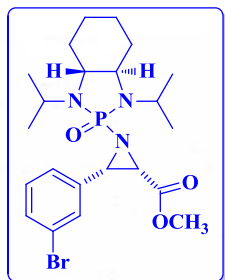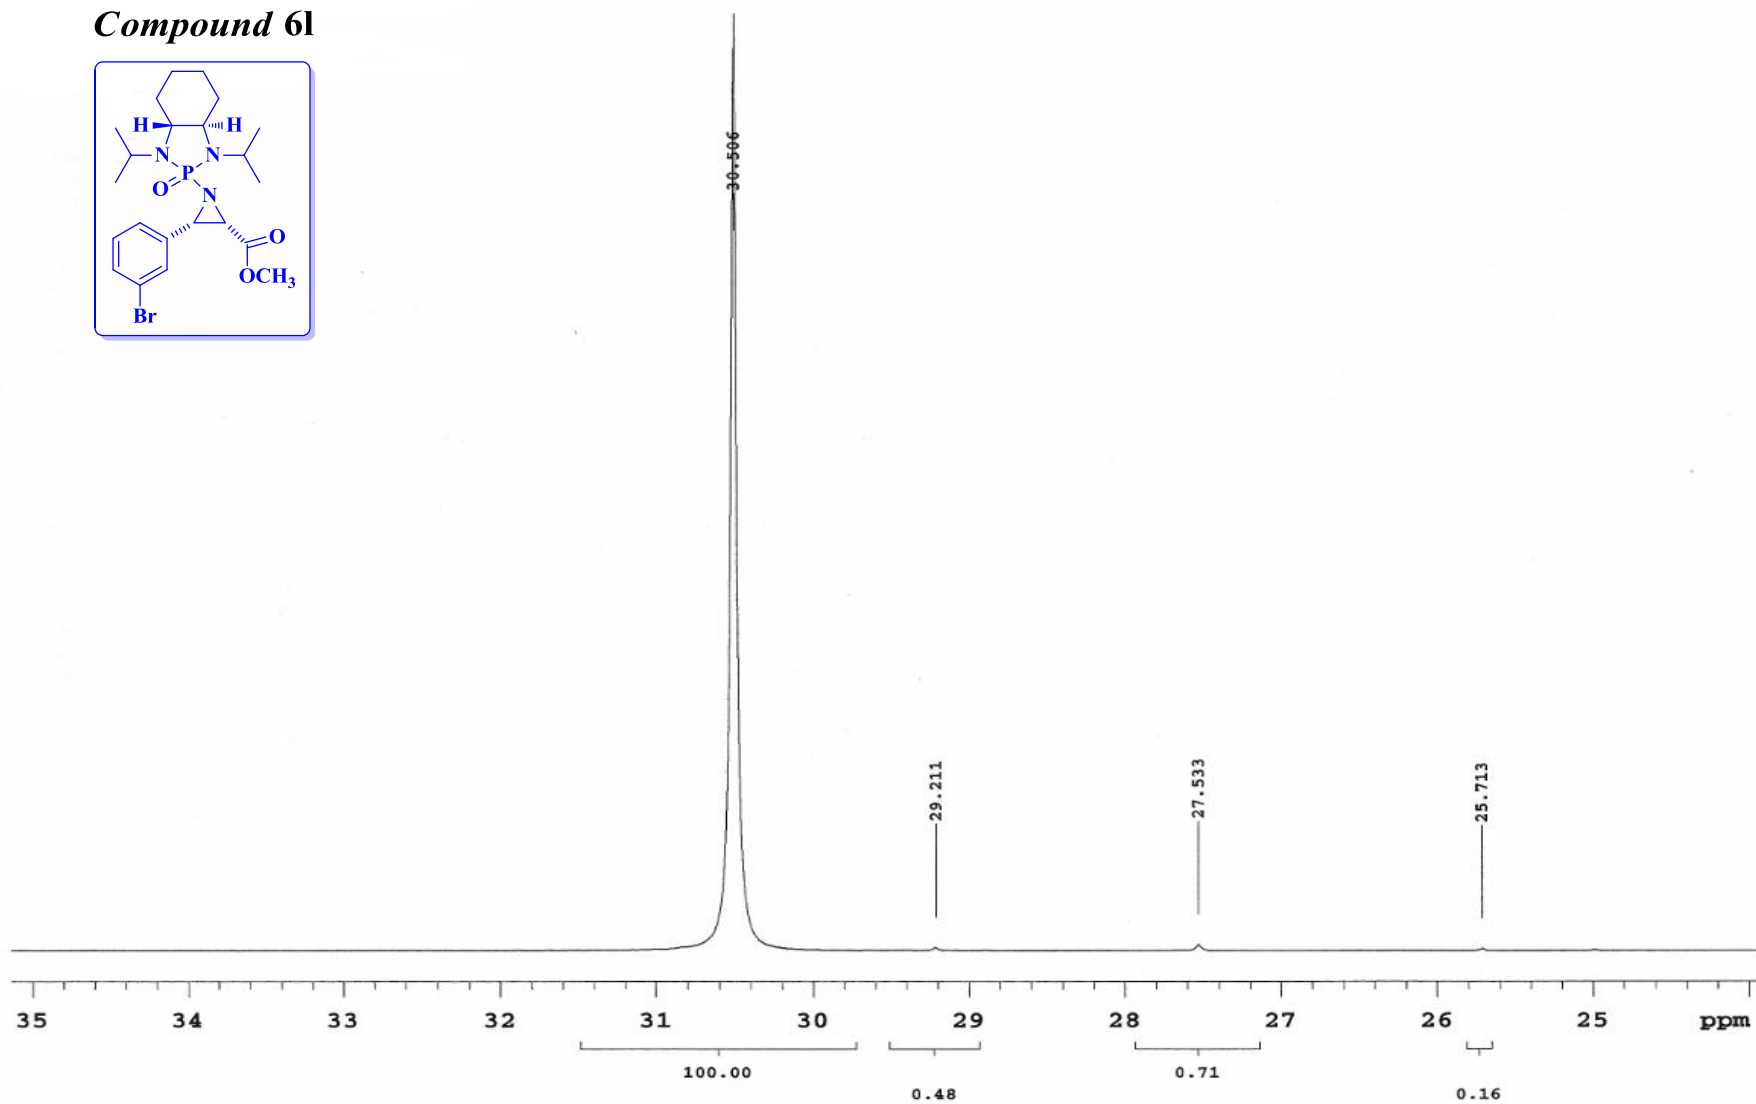

Padmanabha Kattamuri, PVK-D-50

University of Illinois, SCS, Mass Spectrometry Lab

Q-tof UE521

Qtof\_41967 36 (2.578) AM (Cen,5, 80.00, Ar,15000.0,0.00,0.70); Sm (SG, 2x5.00); Cm (36-10:12x8.000)

1: TOF MS ES+  
7.41e3

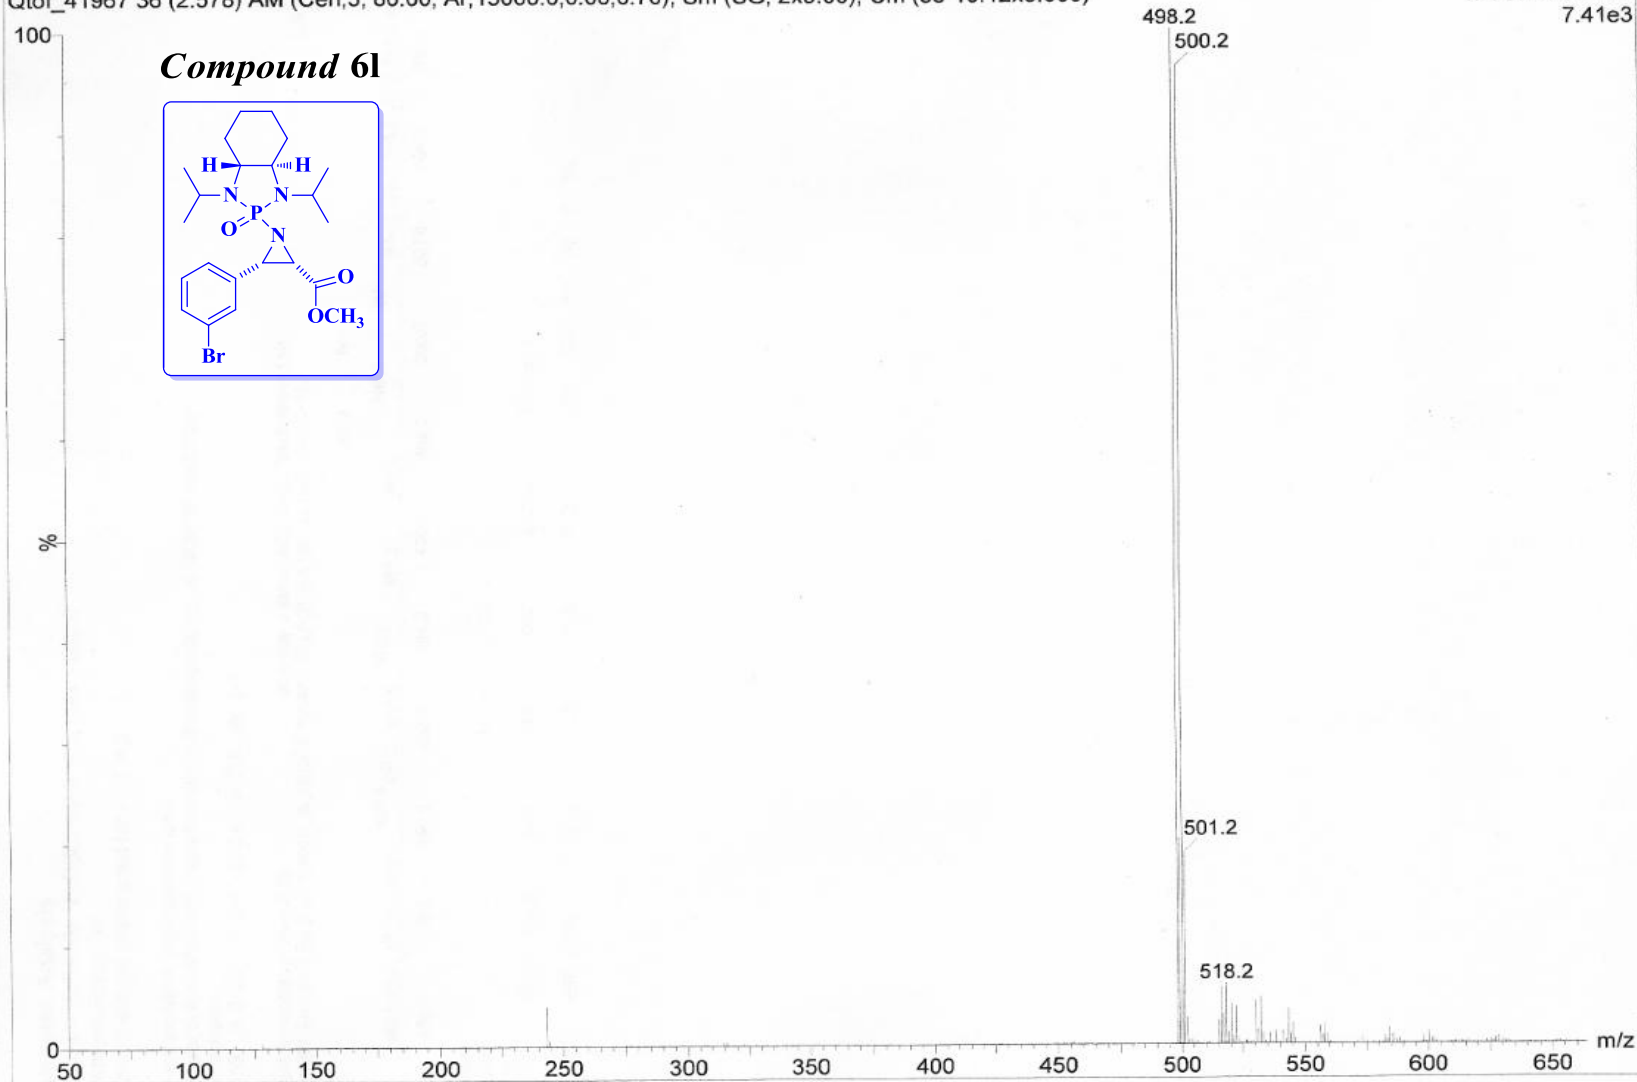

## Elemental Composition Report

Page 1

### Single Mass Analysis

Tolerance = 10.0 PPM / DBE: min = -1.5, max = 600.0

Element prediction: Off

Number of isotope peaks used for i-FIT = 3

### Monoisotopic Mass, Even Electron Ions

87 formula(e) evaluated with 1 results within limits (all results (up to 1000) for each mass)

Elements Used:

C: 0-150 H: 0-250 N: 2-4 O: 2-4 P: 0-1 Br: 1-1

Padmanabha Kattamuri, PVK-D-50

University of Illinois, SCS, Mass Spectrometry Lab

Qtof\_41967 50 (3.579) AM (Cen,3, 80.00, Ar,15000.0,716.46,0.70,LS 3); Sm (SG, 2x3.00); Cm (50:52)

Q-tof UE521  
1: TOF MS ES+  
2.13e+003

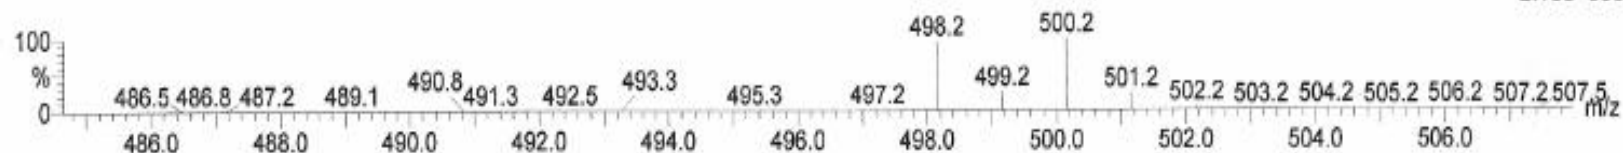

Minimum: -1.5  
Maximum: 5.0 10.0 600.0

| Mass     | Calc. Mass | mDa | PPM | DBE | i-FIT | Formula            |
|----------|------------|-----|-----|-----|-------|--------------------|
| 498.1522 | 498.1521   | 0.1 | 0.2 | 7.5 | 0.7   | C22 H34 N3 O3 P Br |

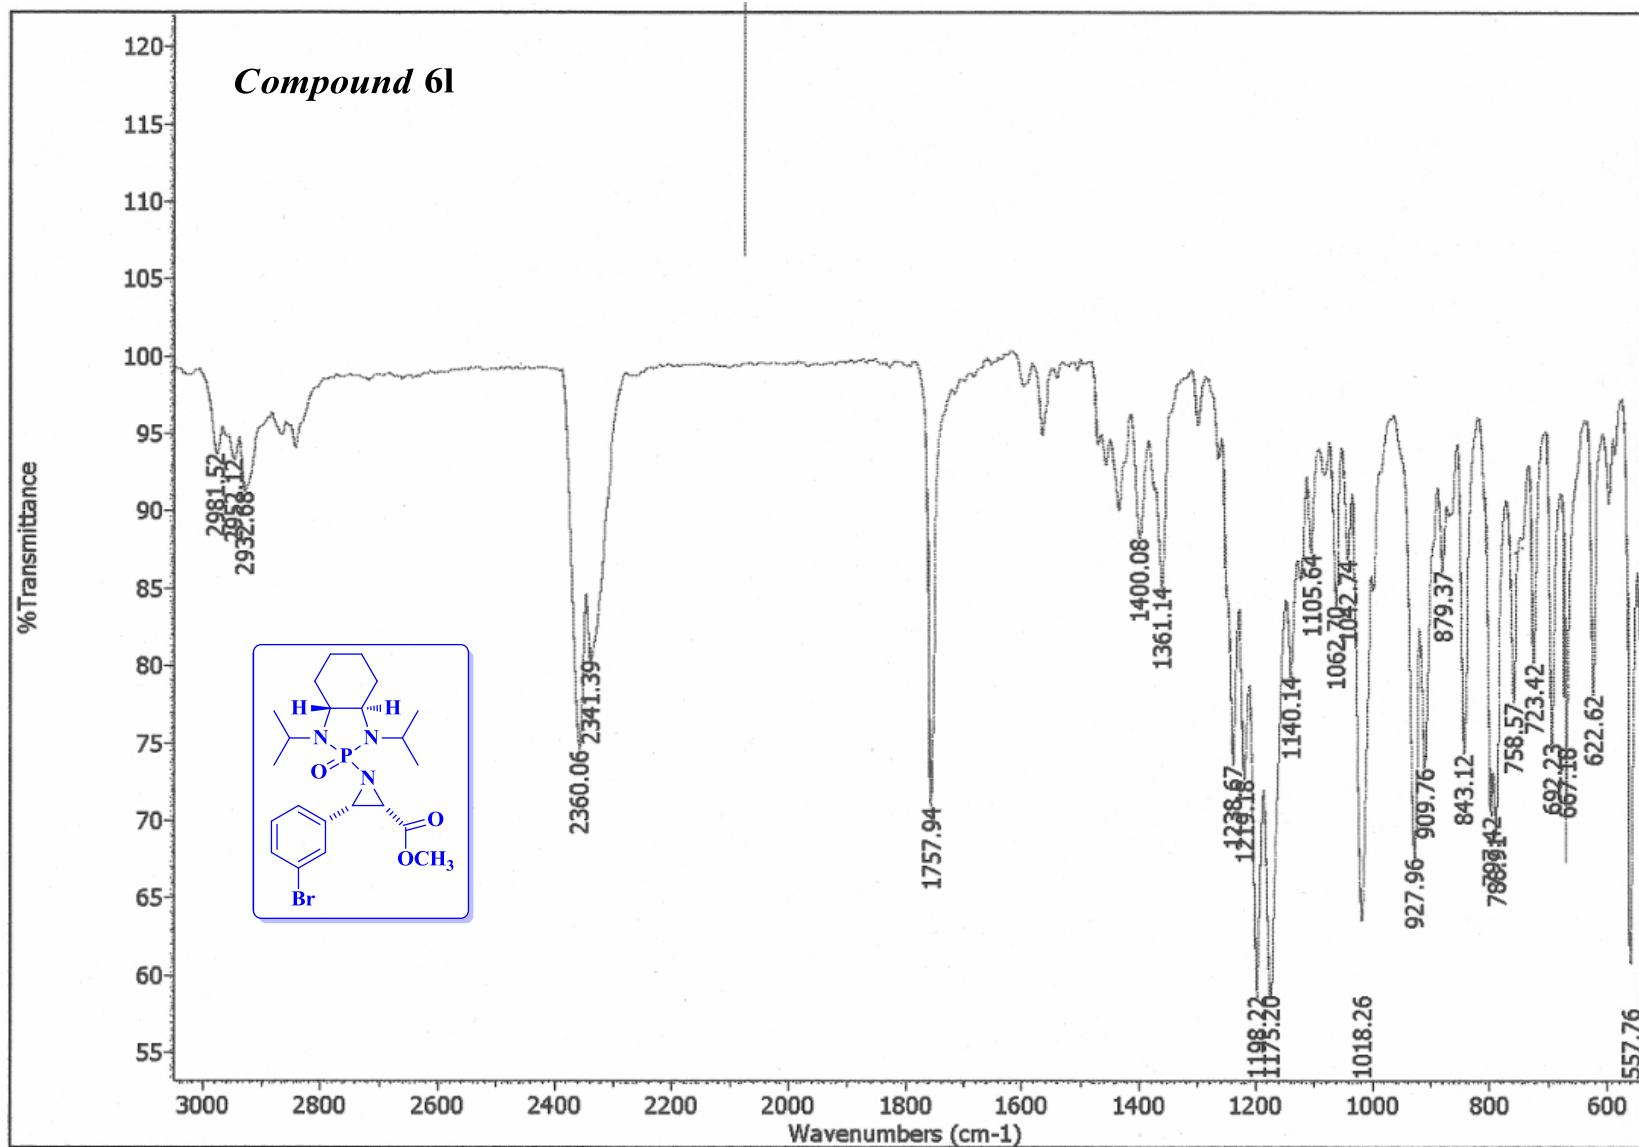

### Compound 6m

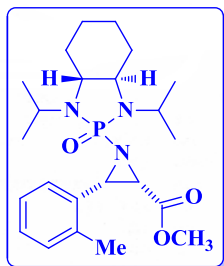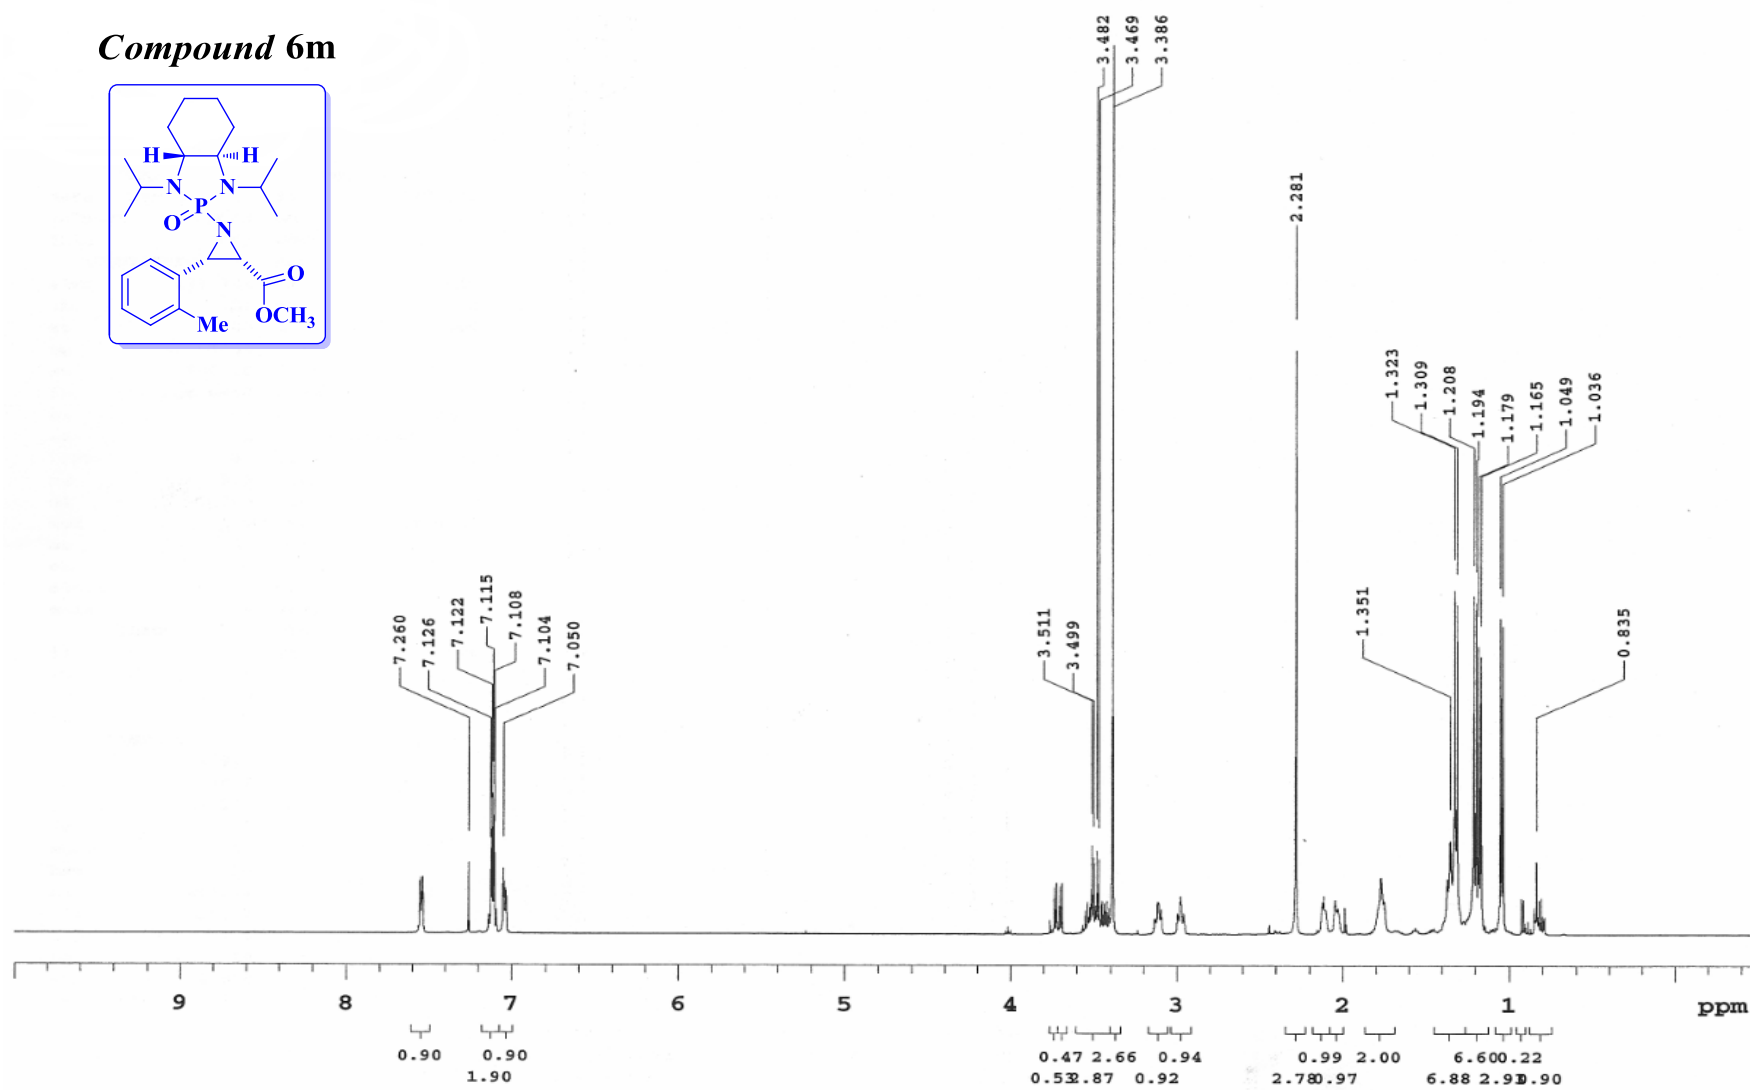

### Compound 6m

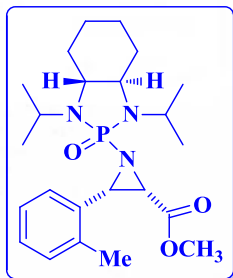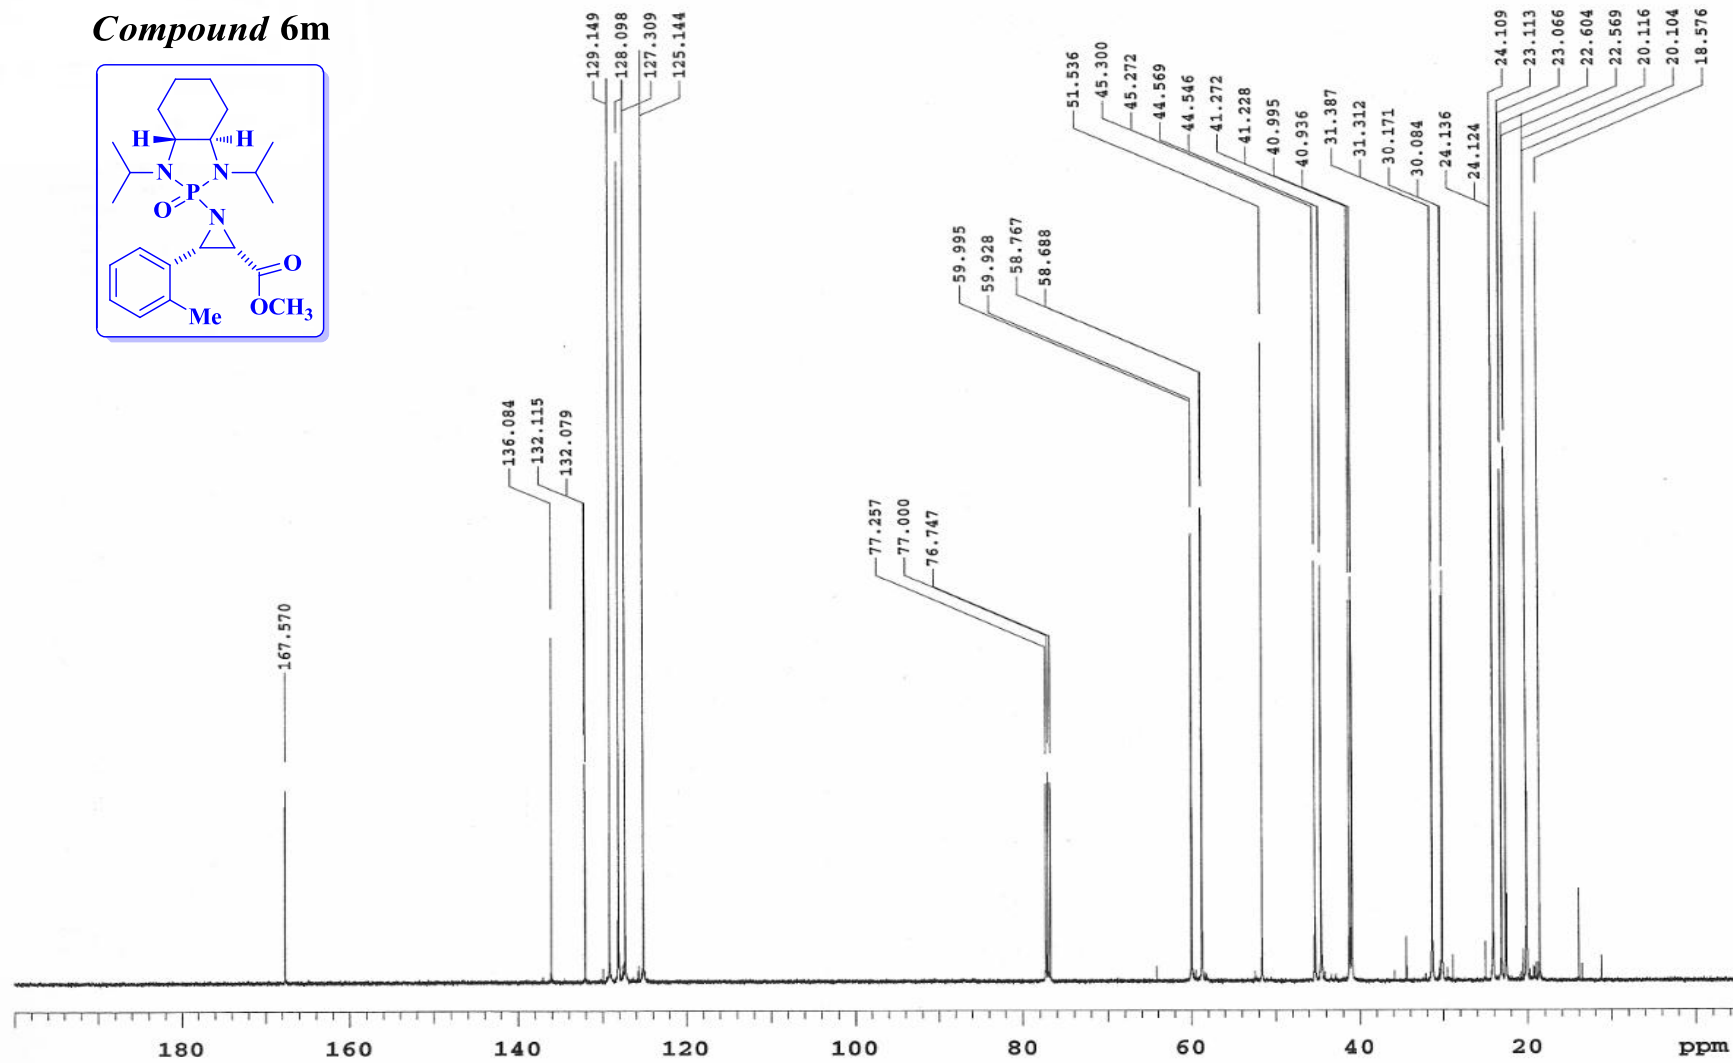



**Compound 6m**

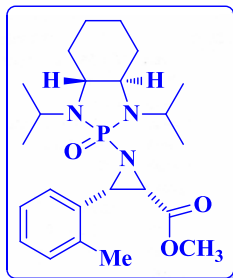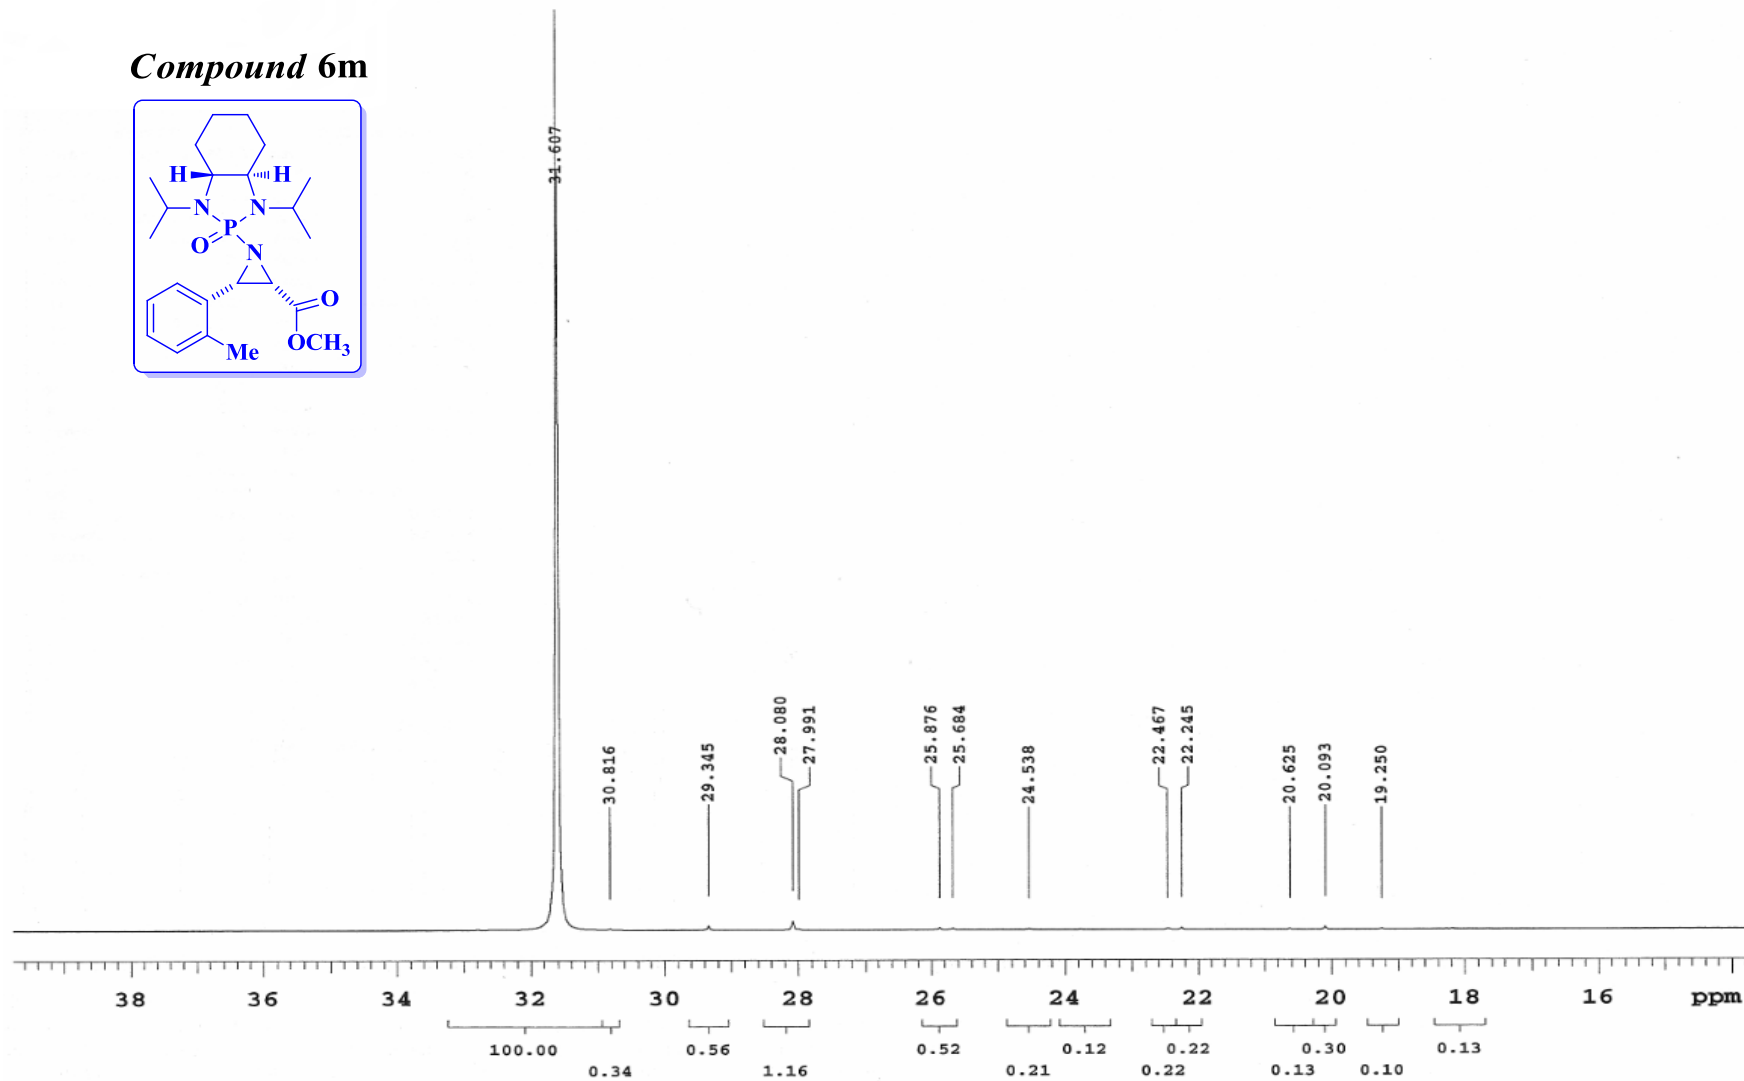

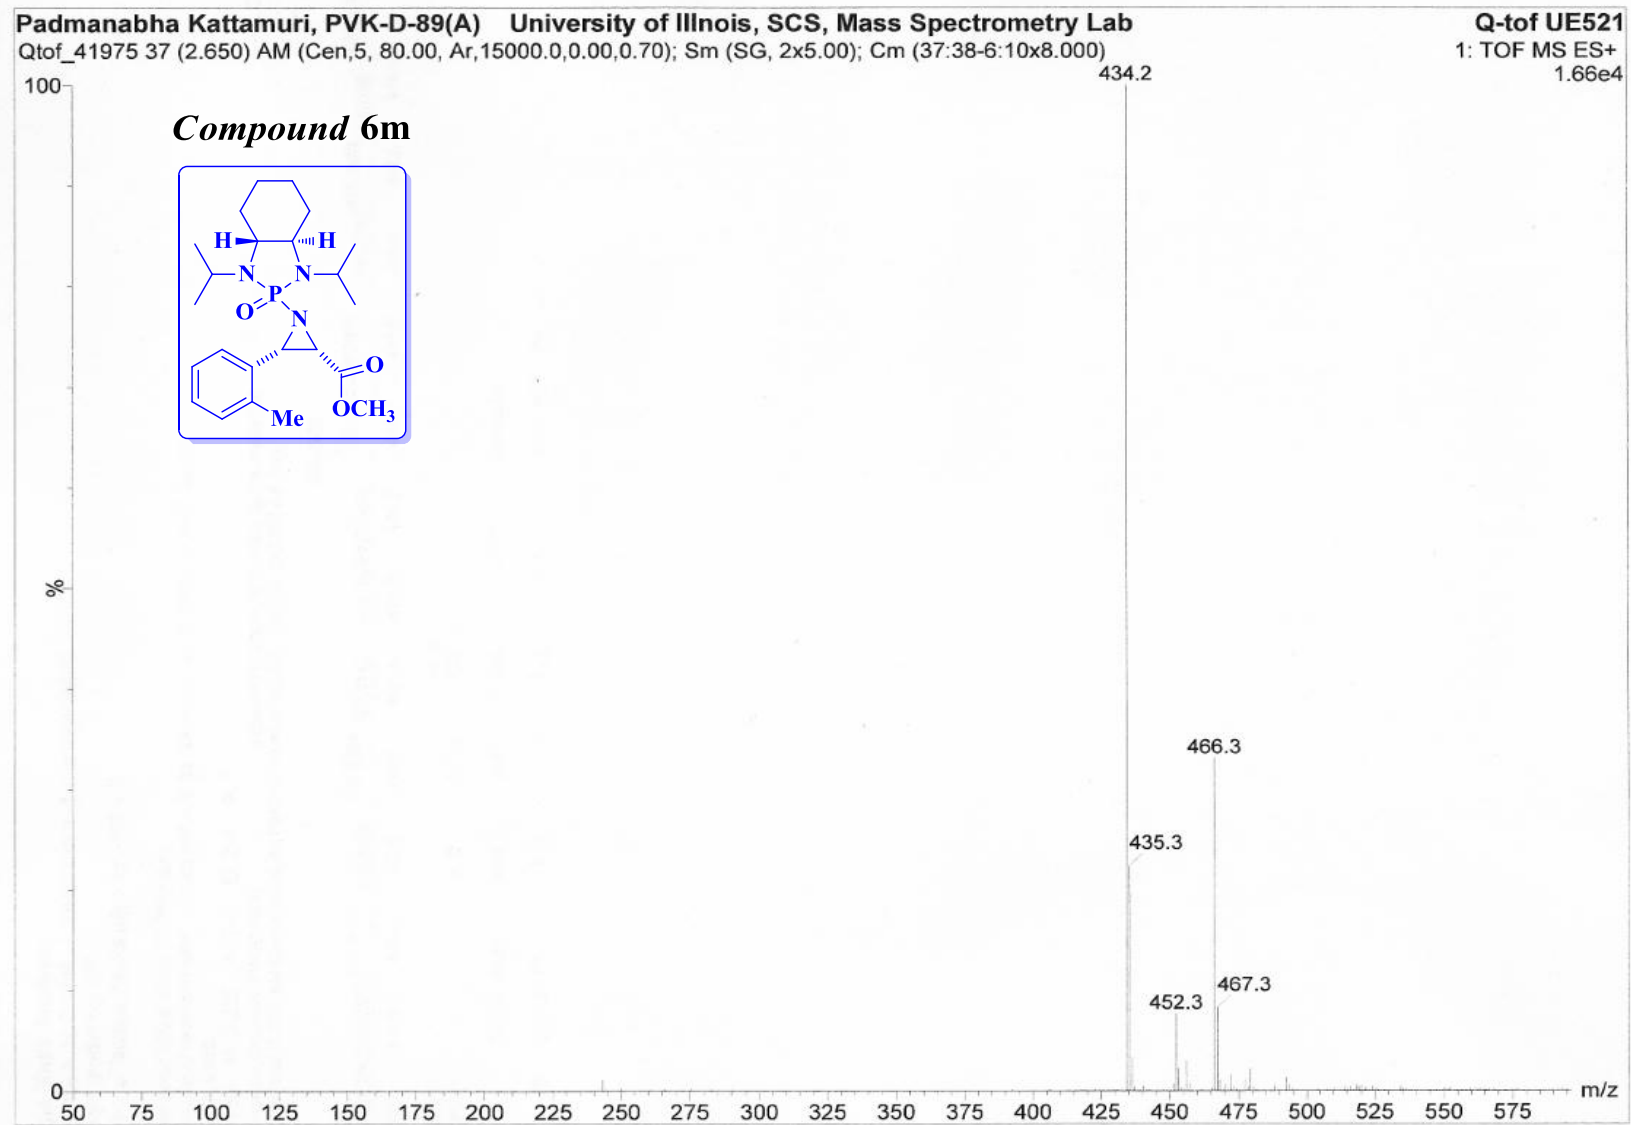

## Elemental Composition Report

Page 1

### Single Mass Analysis

Tolerance = 10.0 PPM / DBE: min = -1.5, max = 600.0

Element prediction: Off

Number of isotope peaks used for i-FIT = 3

Monoisotopic Mass, Even Electron Ions

91 formula(e) evaluated with 1 results within limits (all results (up to 1000) for each mass)

Elements Used:

C: 0-150 H: 0-250 N: 2-4 O: 2-4 P: 0-1

Padmanabha Kattamuri, PVK-D-89(A)

University of Illinois, SCS, Mass Spectrometry Lab

Qtof\_41975 52 (3.722) AM (Cen,3, 80.00, Ar,15000.0,716.46,0.70,LS 3); Sm (SG, 2x3.00); Cm (52)

Q-tof UE521  
1: TOF MS ES+  
1.40e+003

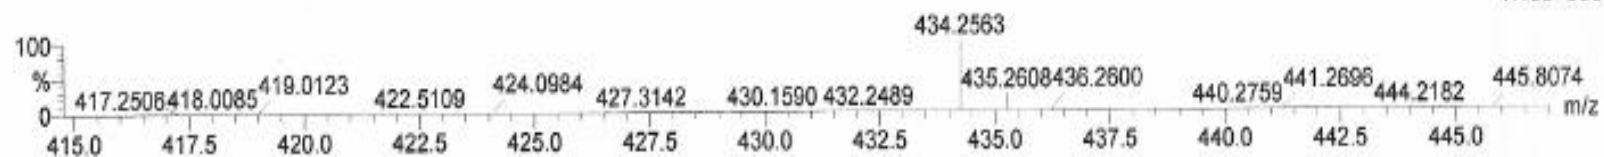

Minimum:

Maximum:

-1.5  
600.0

| Mass     | Calc. Mass | mDa  | PPM  | DBE | i-FIT | Formula         |
|----------|------------|------|------|-----|-------|-----------------|
| 434.2563 | 434.2573   | -1.0 | -2.3 | 7.5 | 3.5   | C23 H37 N3 O3 P |

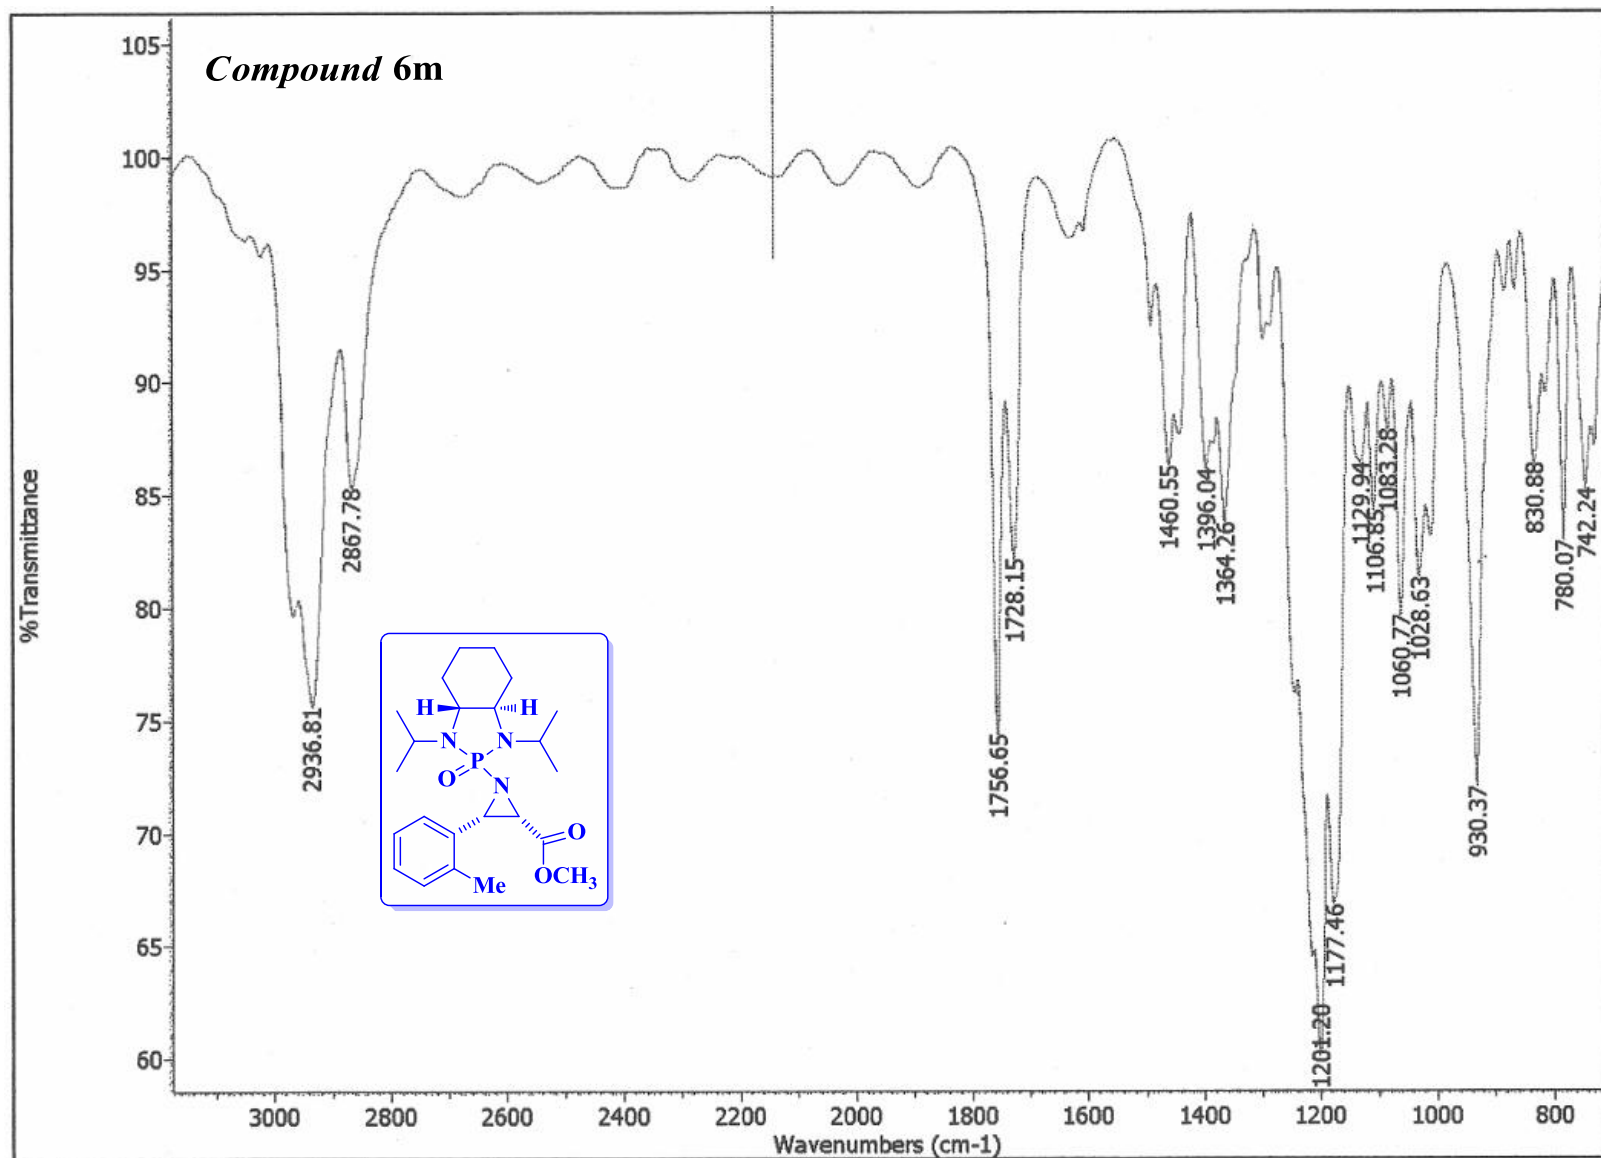

### Compound 6n

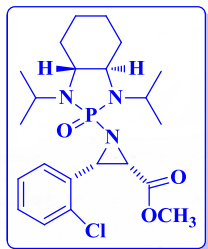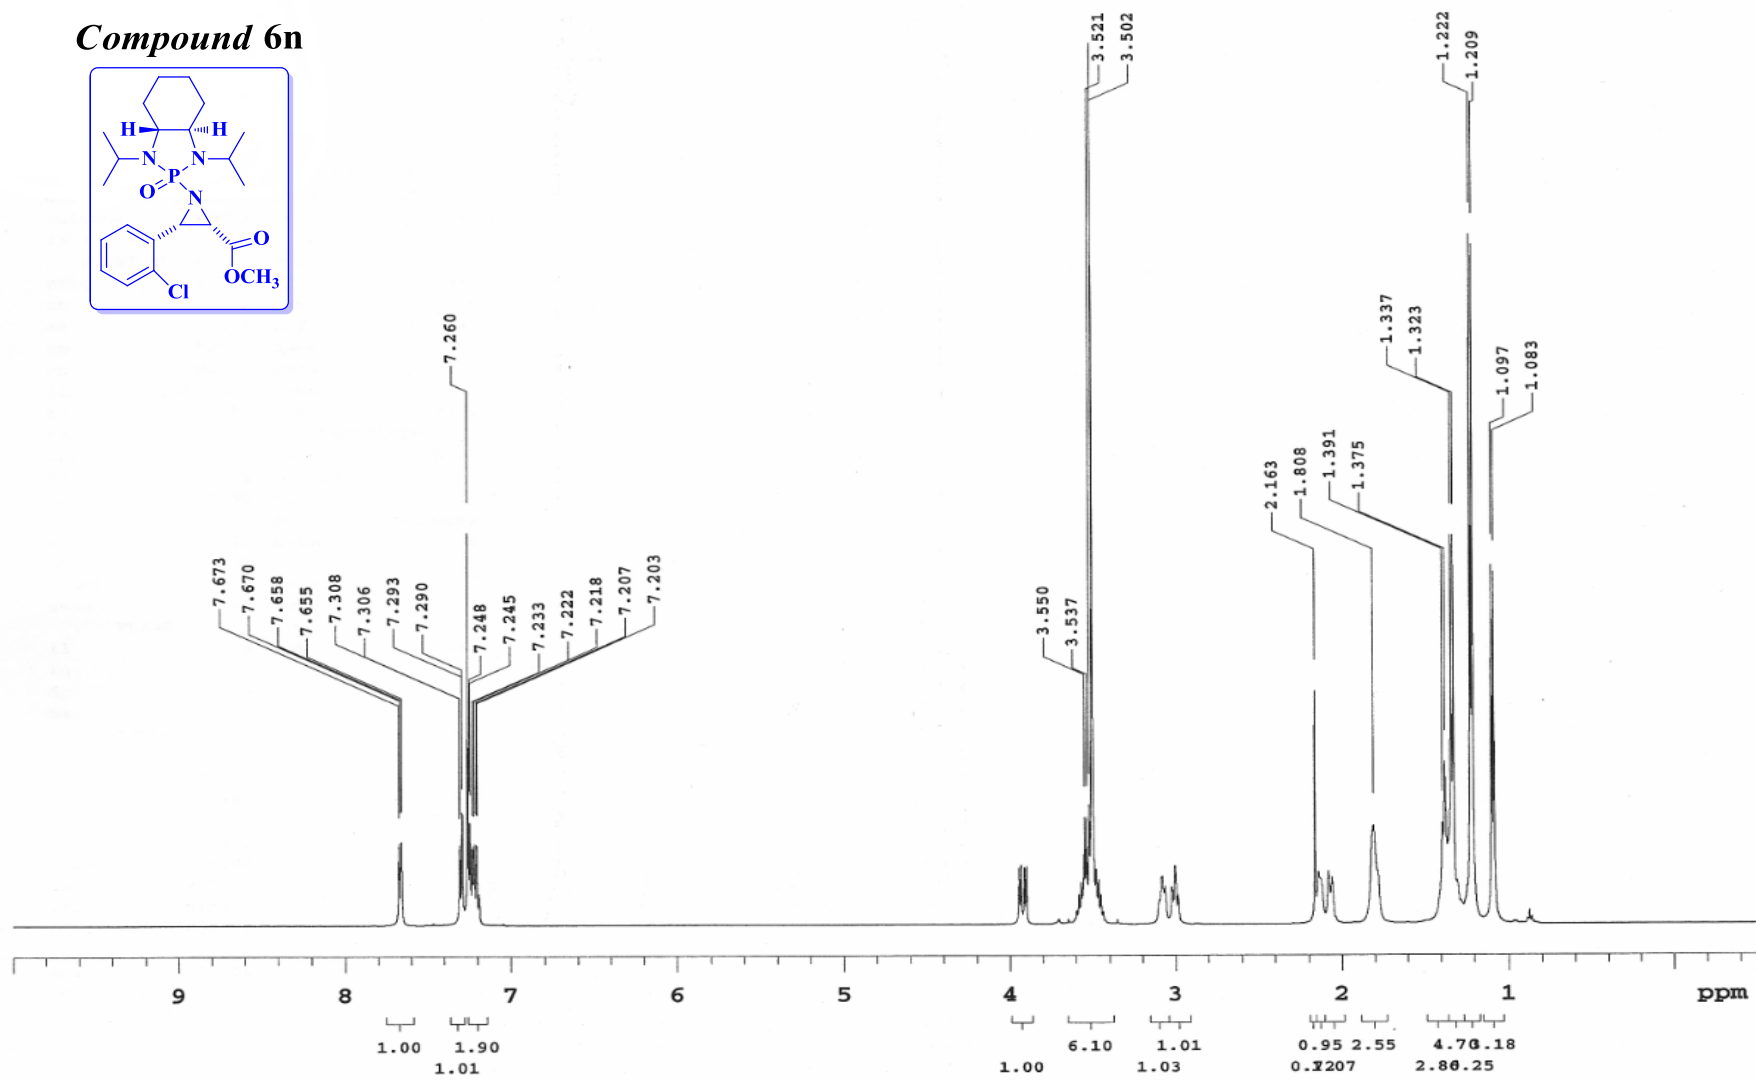

**Compound 6n**

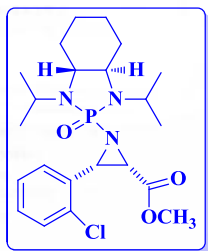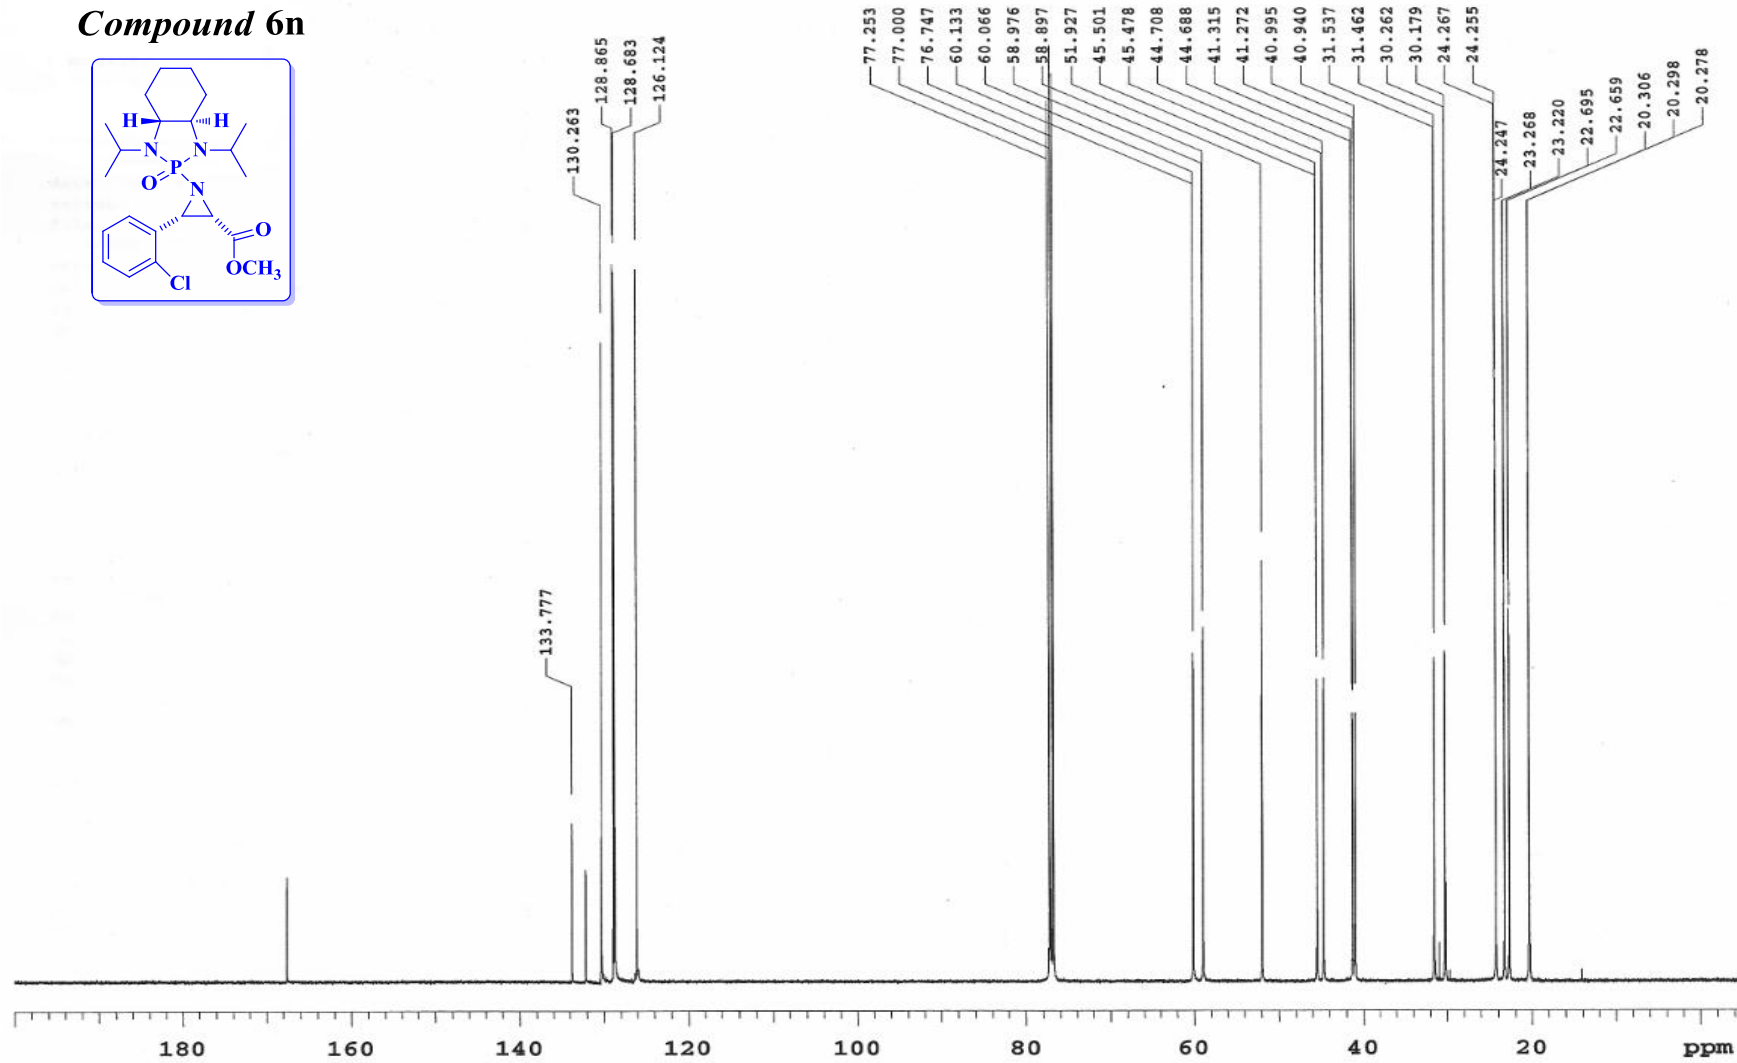

**Compound 6n**

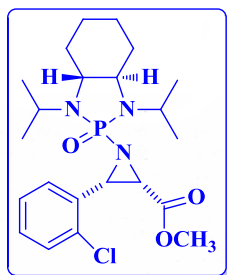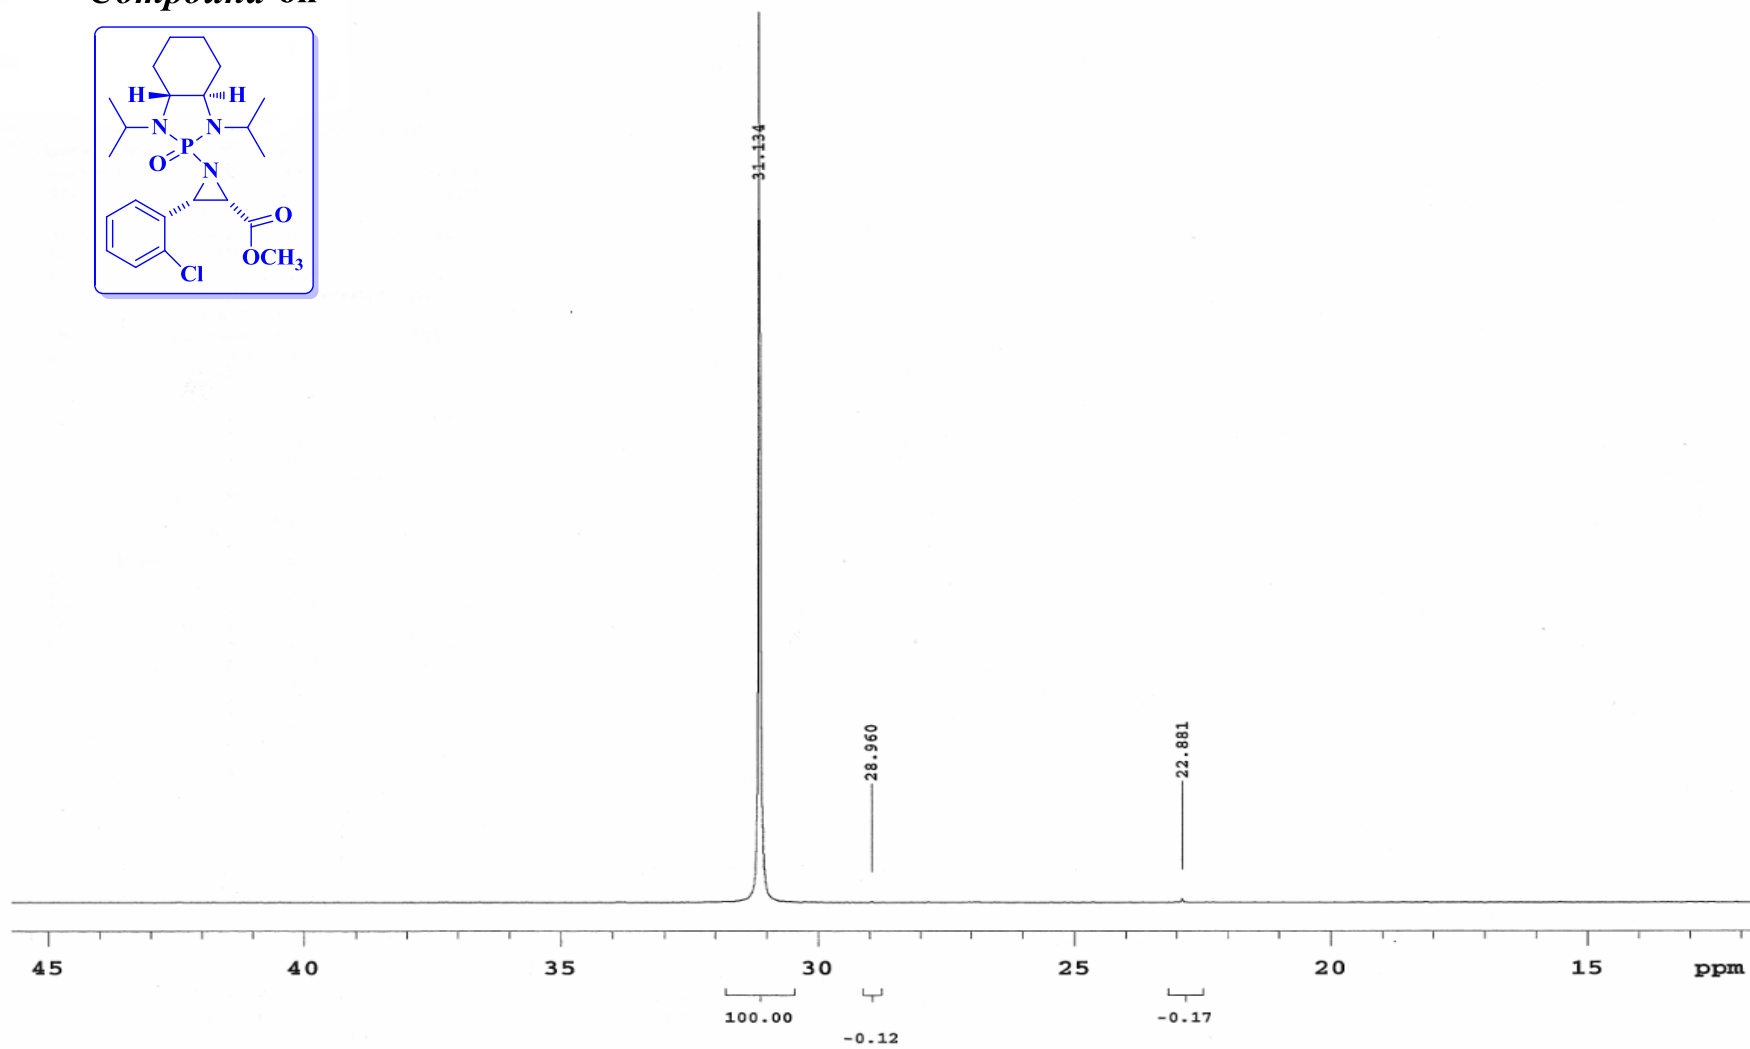

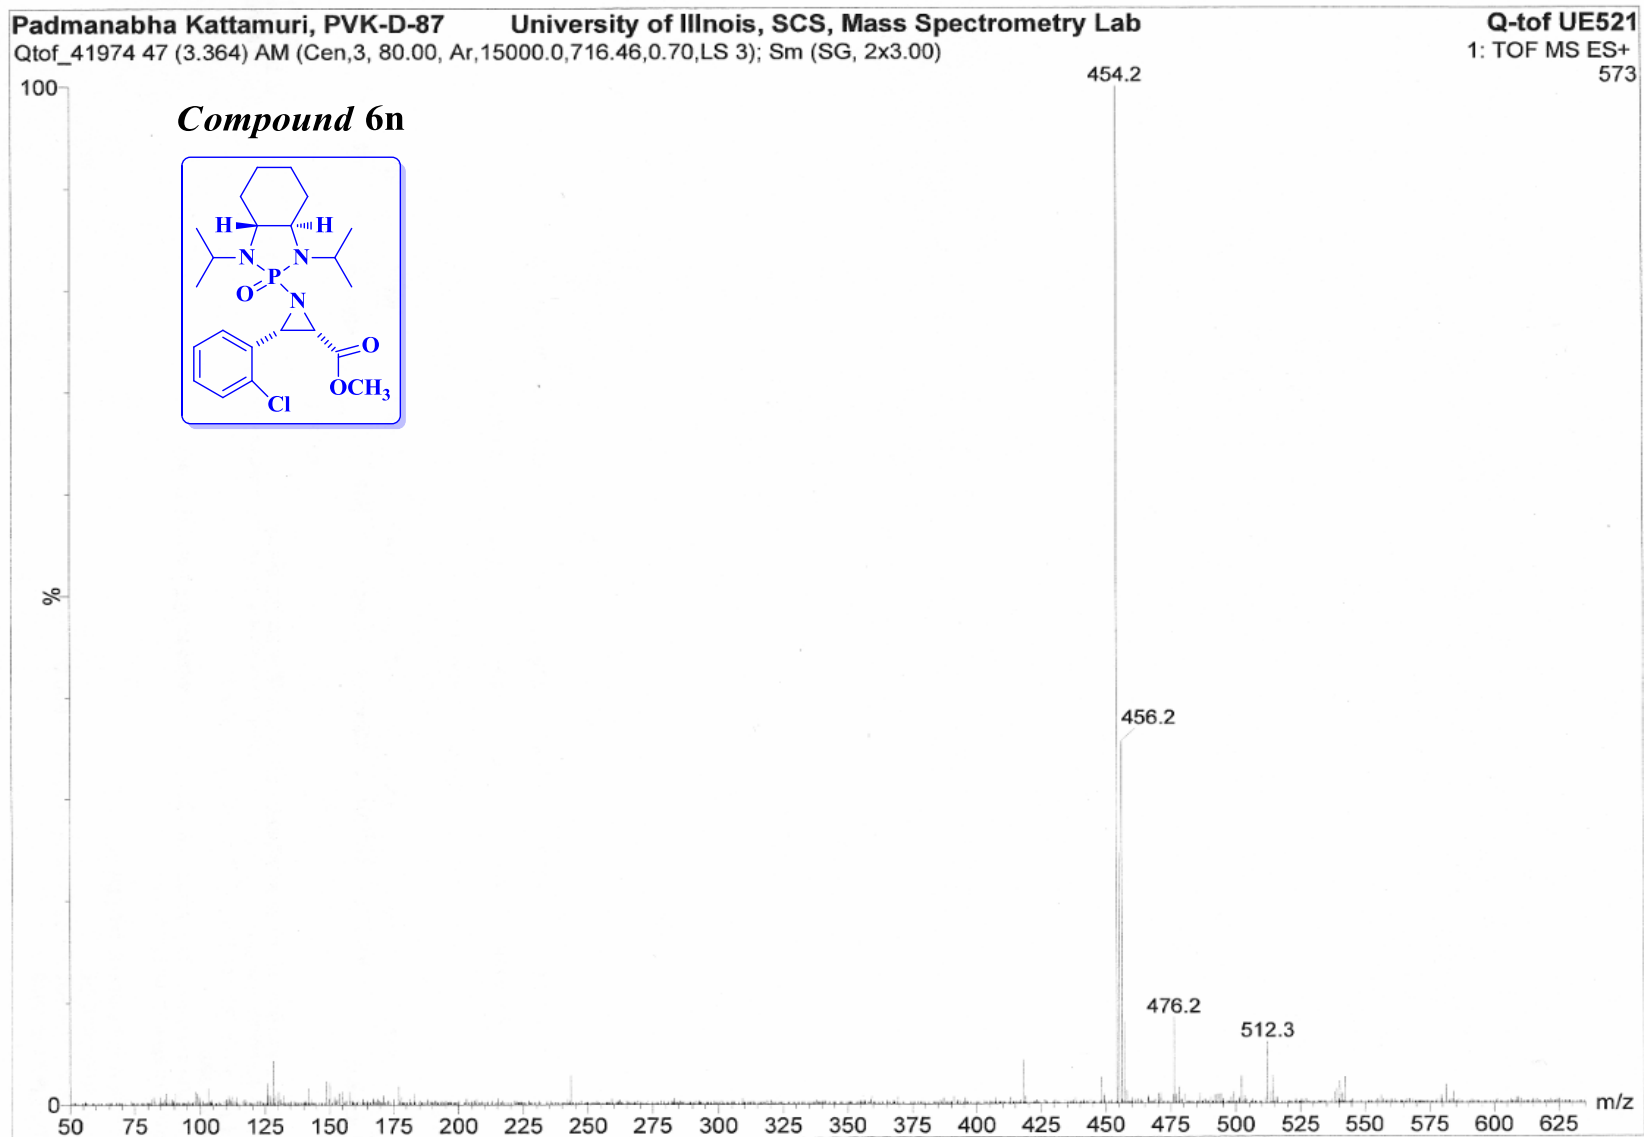



## Elemental Composition Report

Page 1

### Single Mass Analysis

Tolerance = 10.0 PPM / DBE: min = -1.5, max = 600.0

Element prediction: Off

Number of isotope peaks used for i-FIT = 3

Monoisotopic Mass, Even Electron Ions

87 formula(e) evaluated with 1 results within limits (all results (up to 1000) for each mass)

Elements Used:

C: 0-150 H: 0-250 N: 2-4 O: 2-4 P: 0-1 Cl: 1-1

Padmanabha Kattamuri, PVK-D-87

University of Illinois, SCS, Mass Spectrometry Lab

Qtof\_41974 47 (3.364) AM (Cen,3, 80.00, Ar,15000.0,716.46,0.70,LS 3); Sm (SG, 2x3.00)

Q-tof UE521  
1: TOF MS ES+  
5.73e+002

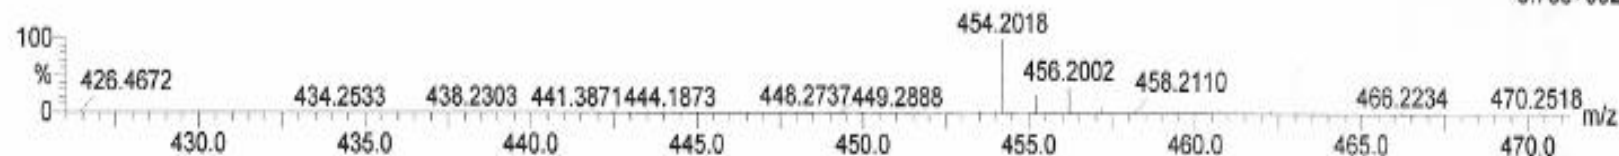

Minimum: -1.5  
Maximum: 5.0 10.0 600.0

| Mass     | Calc. Mass | mDa  | PPM  | DBE | i-FIT | Formula            |
|----------|------------|------|------|-----|-------|--------------------|
| 454.2018 | 454.2026   | -0.8 | -1.8 | 7.5 | 0.2   | C22 H34 N3 O3 P Cl |

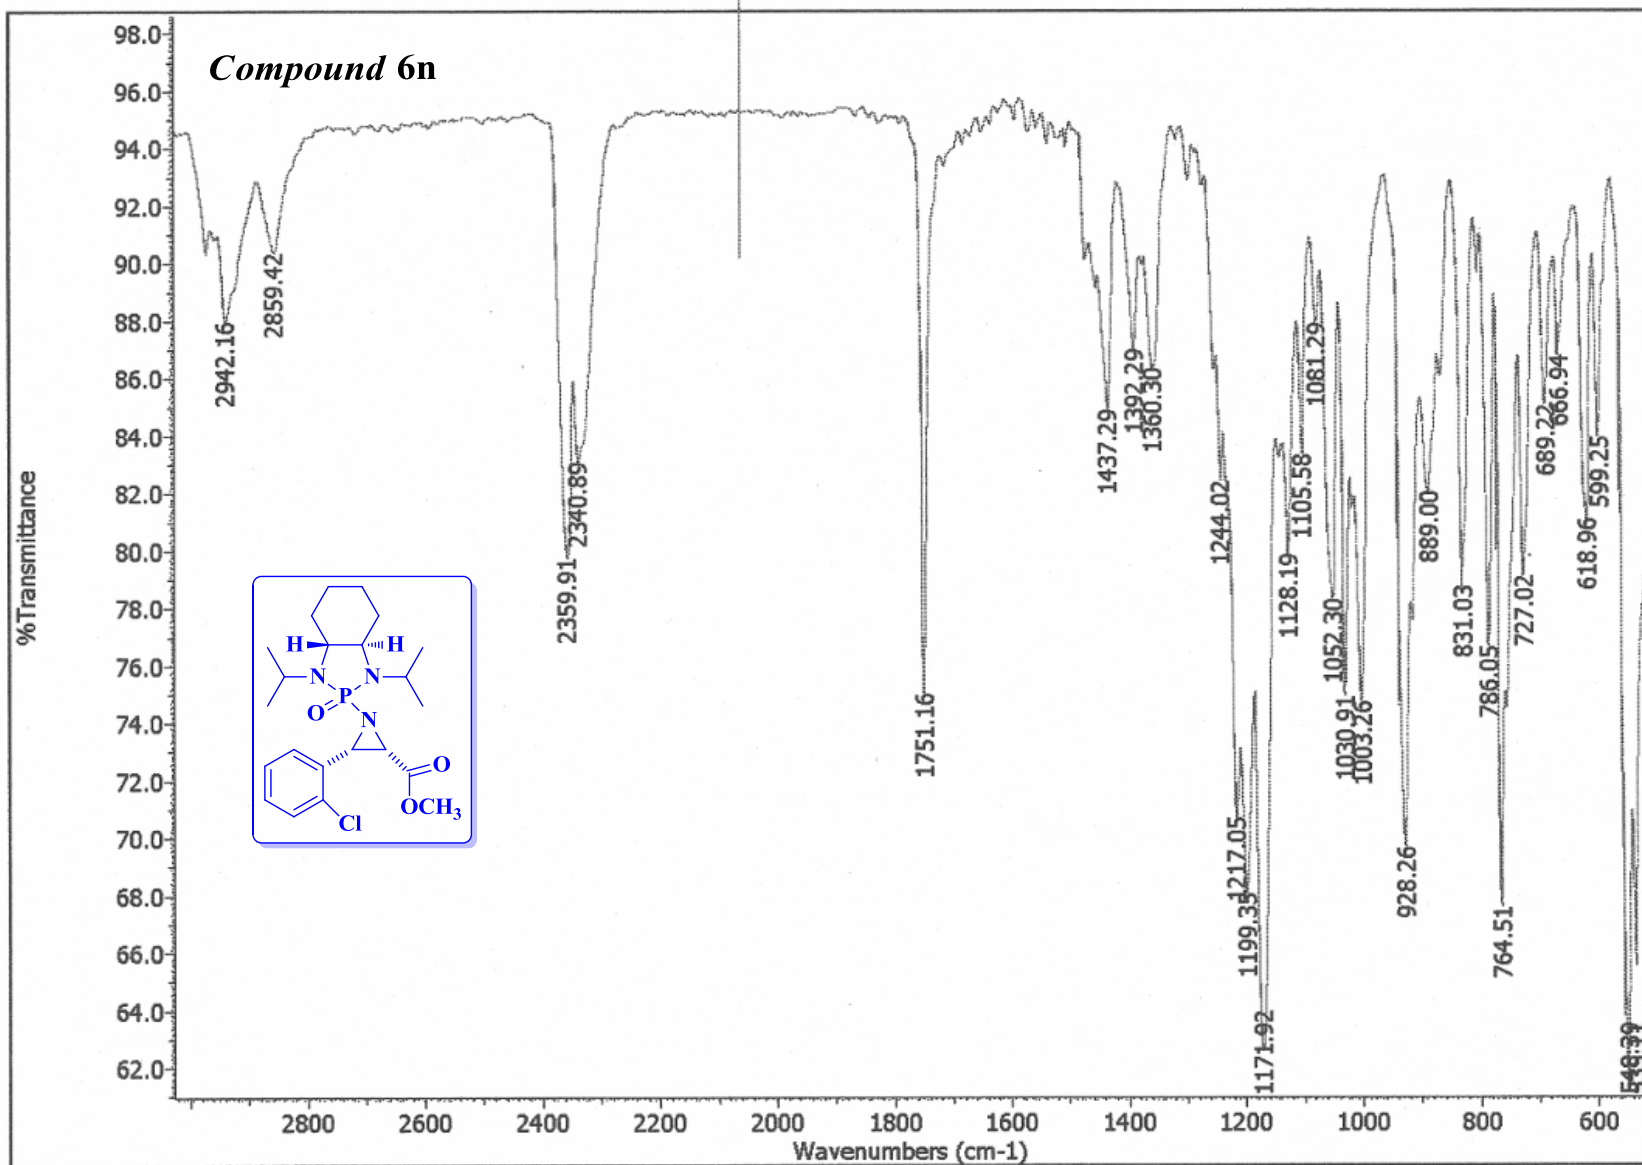

### Compound 60

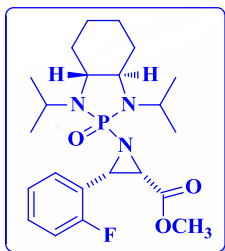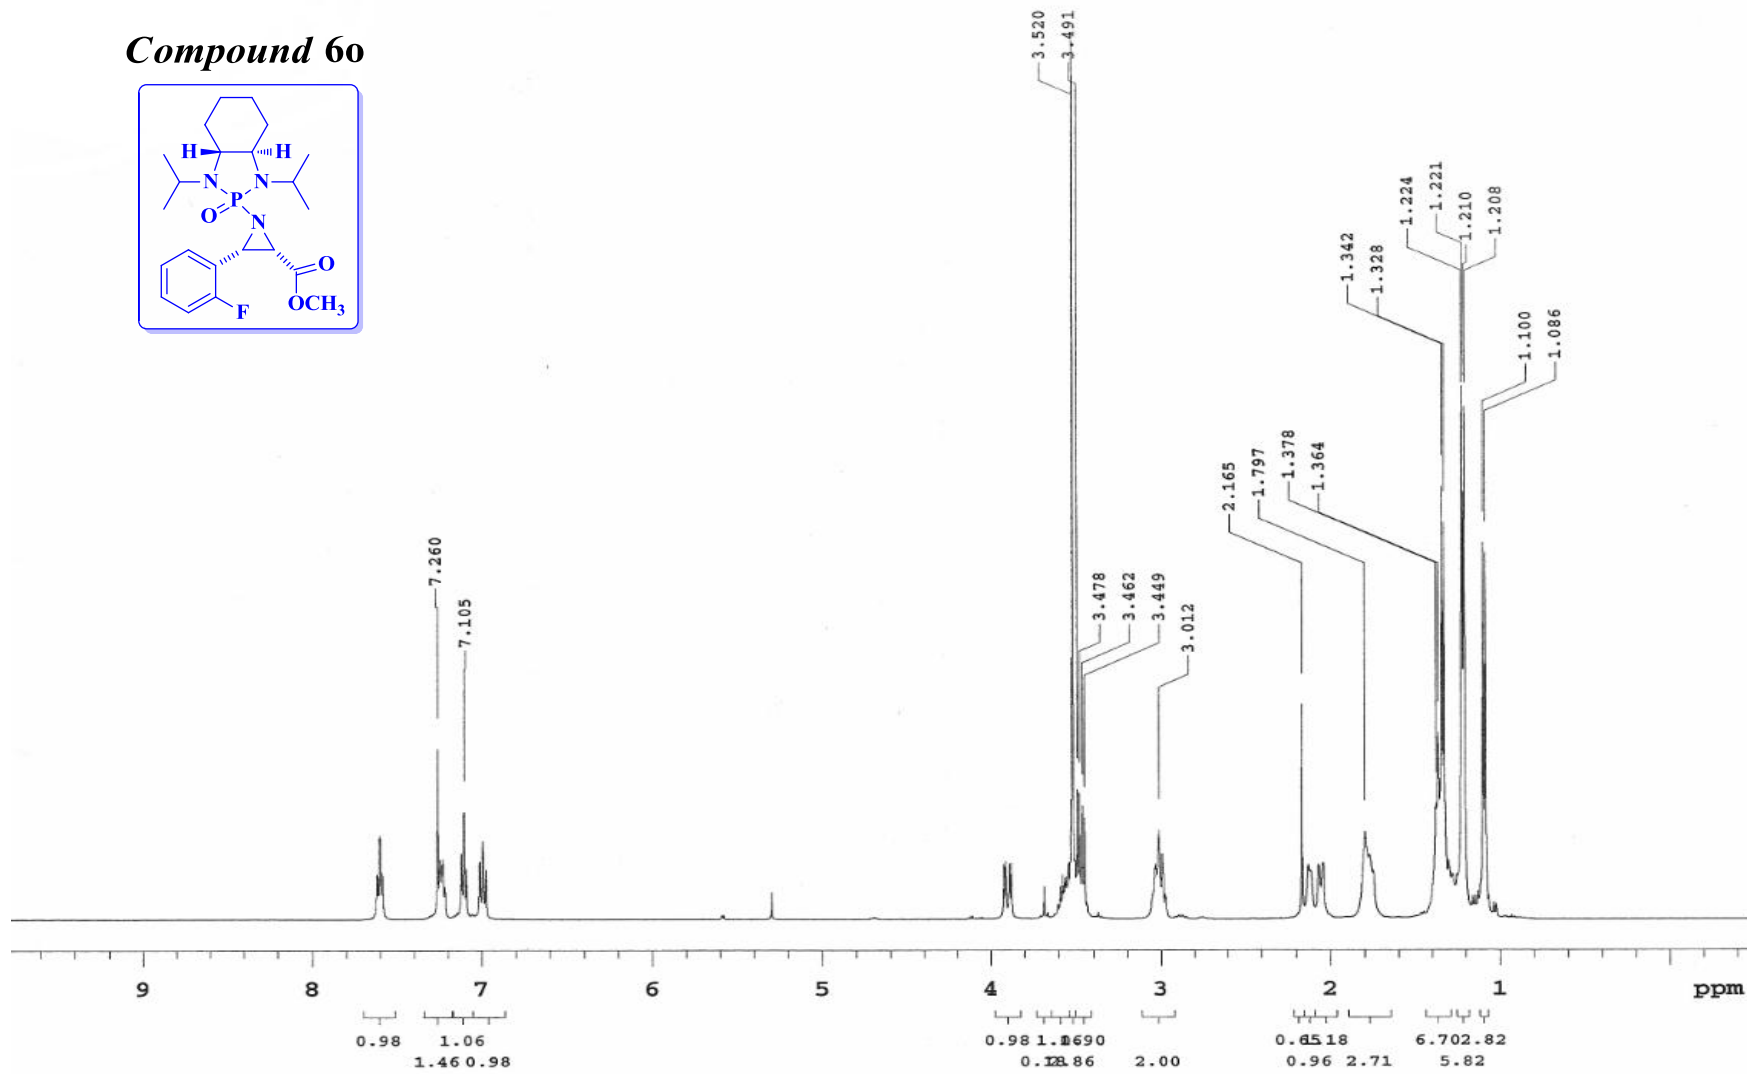

### Compound 60

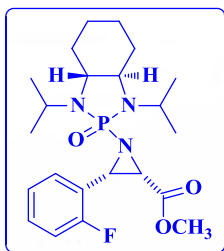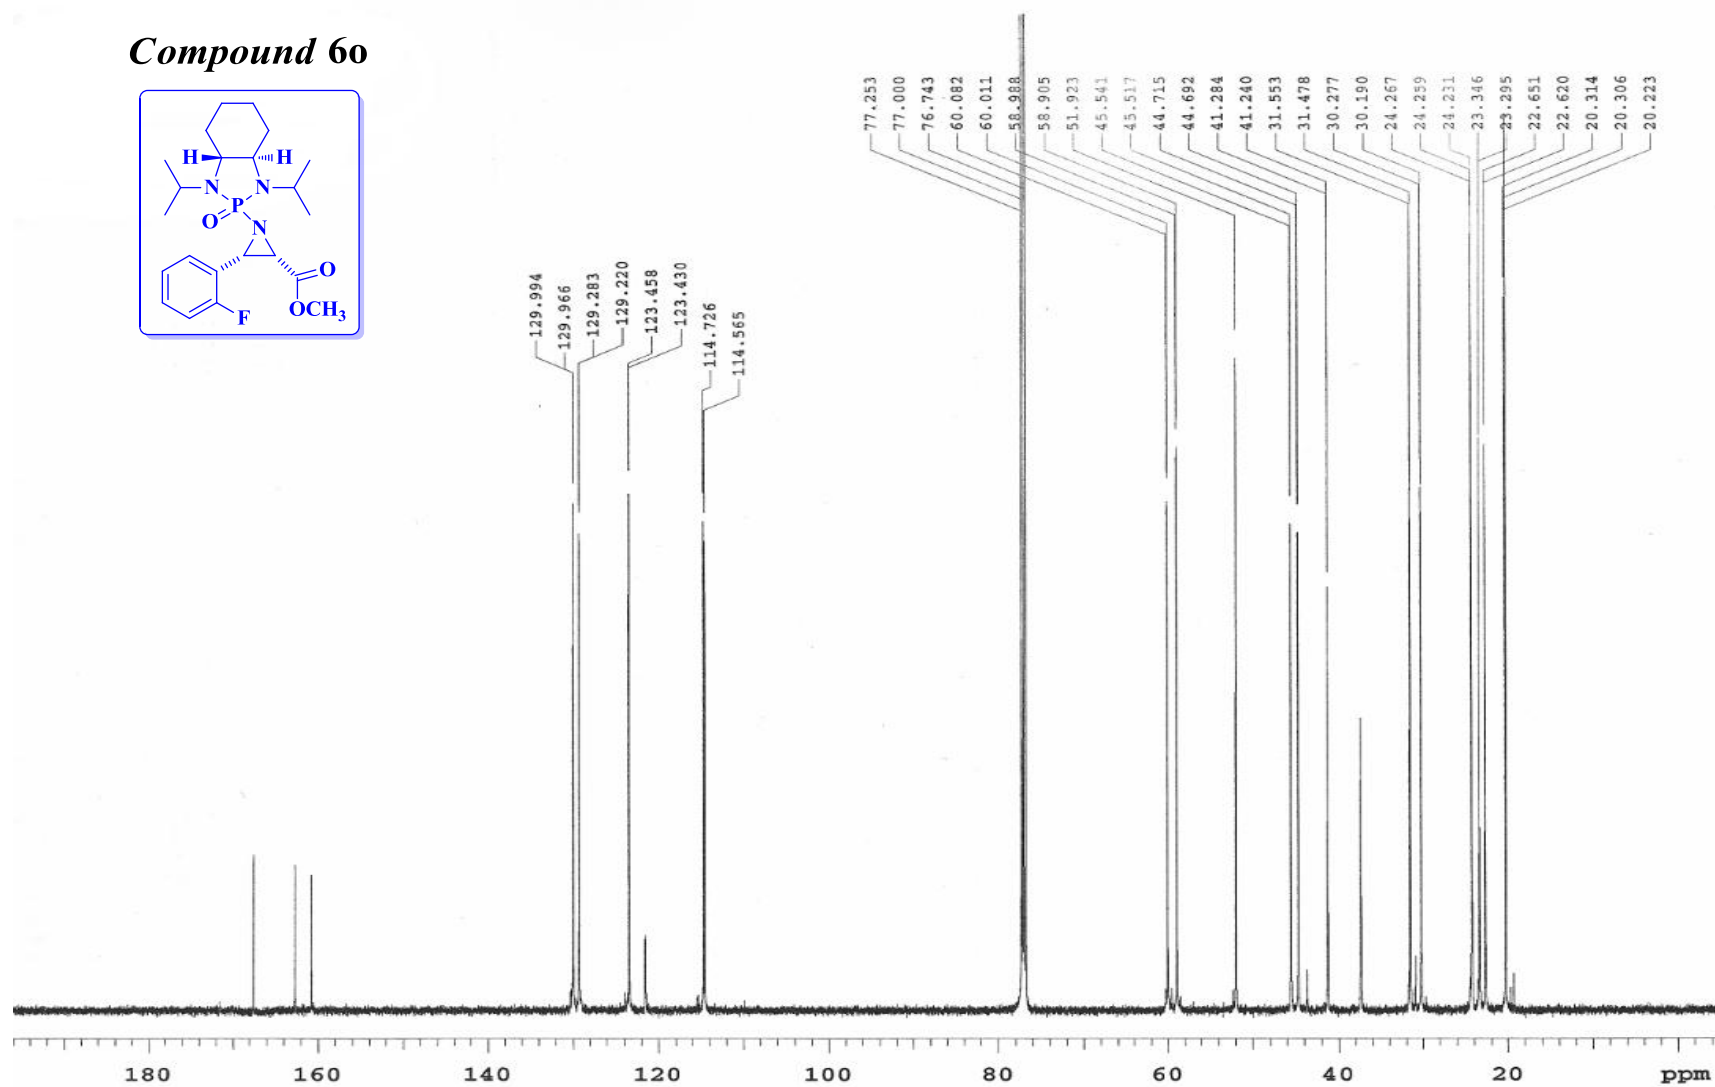

**Compound 60**

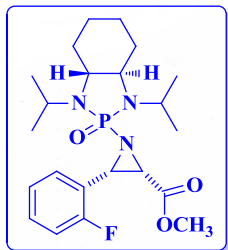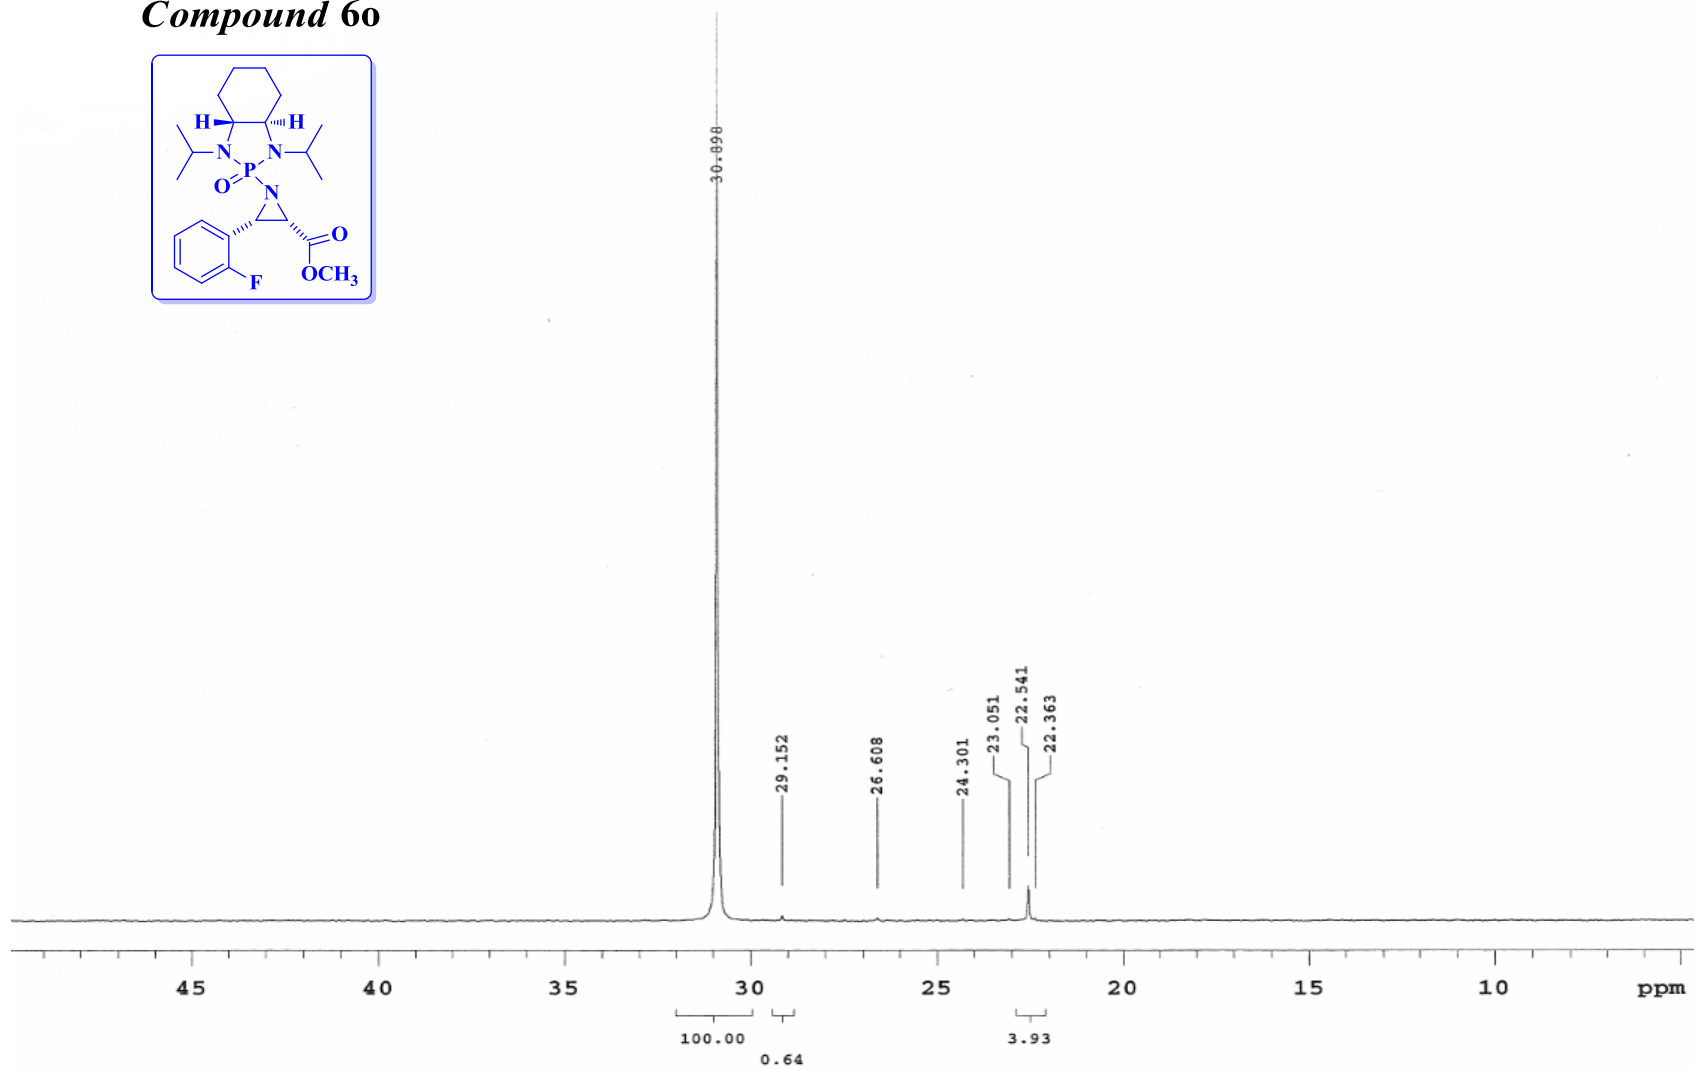

### Compound 60

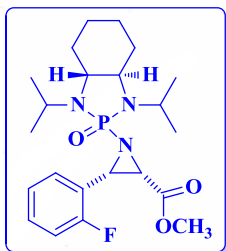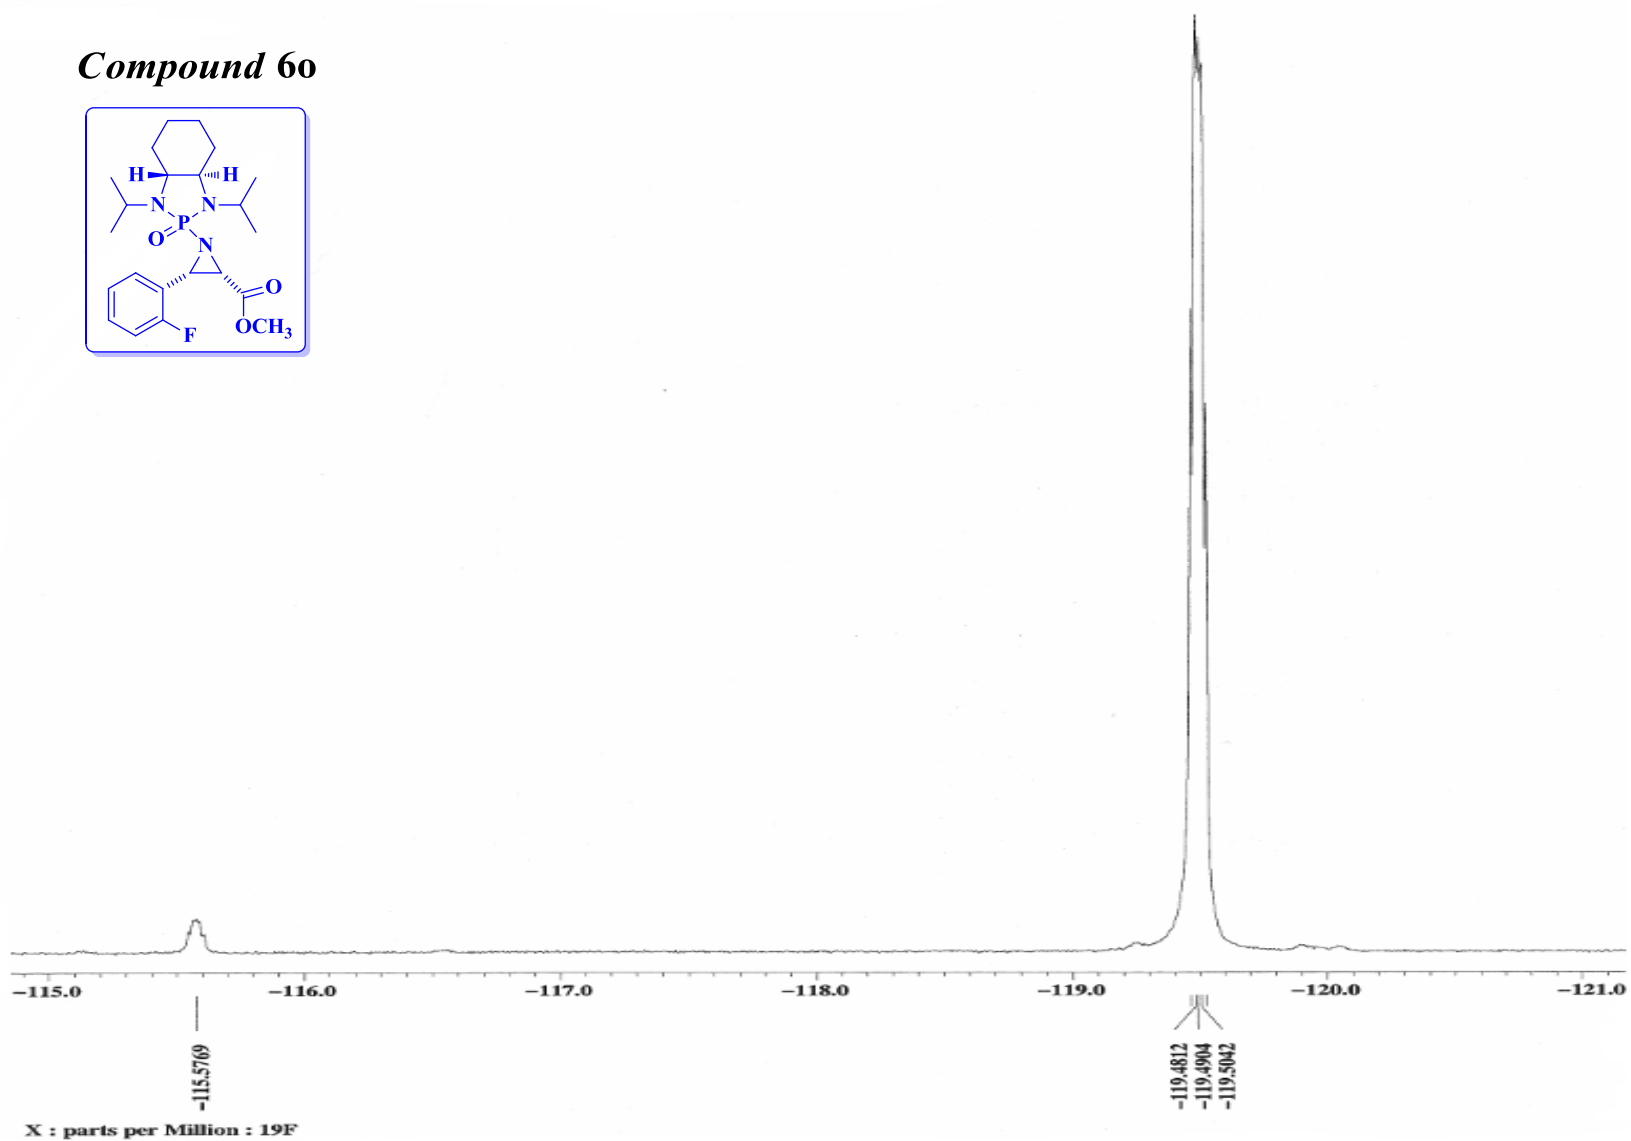

Padmanabha Kattamuri, PVK-D-6

University of Illinois, SCS, Mass Spectrometry Lab

Q-tof UE521

Qtof\_41971 47 (3.364) AM (Cen,3, 80.00, Ar,15000.0,716.46,0.70,LS 3); Sm (SG, 2x3.00); Cm (47:48)

1: TOF MS ES+  
2.64e3

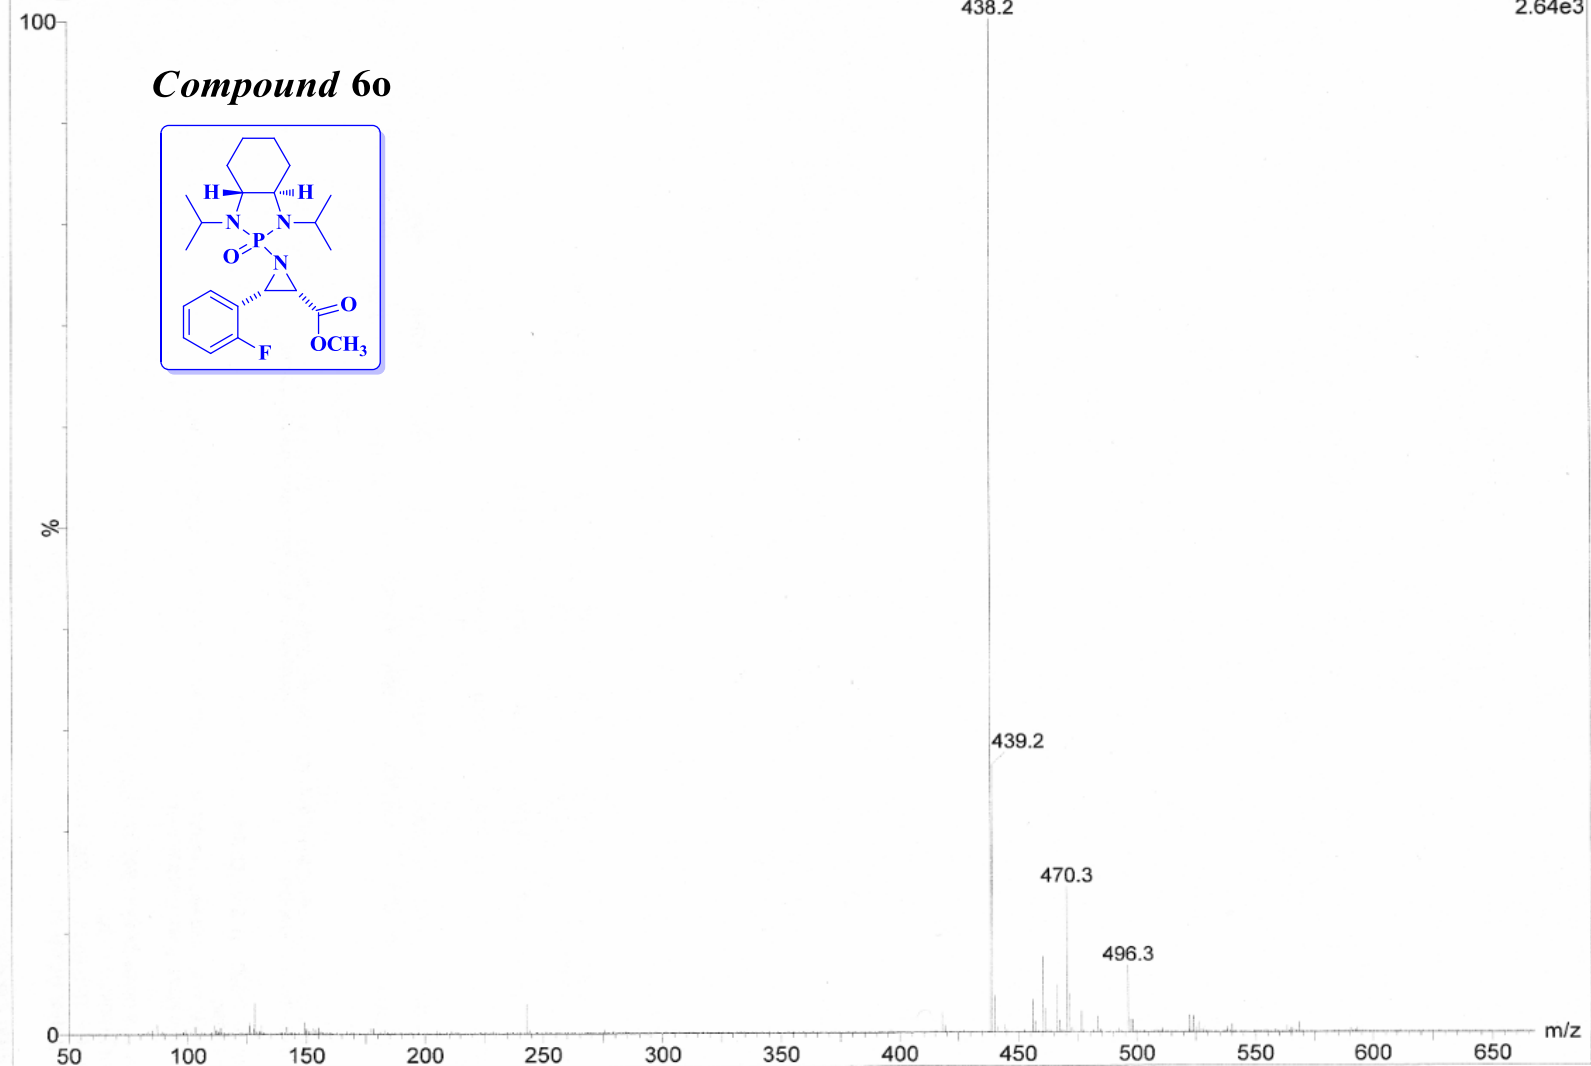

## Elemental Composition Report

Page 1

### Single Mass Analysis

Tolerance = 10.0 PPM / DBE: min = -1.5, max = 600.0

Element prediction: Off

Number of isotope peaks used for i-FIT = 3

Monoisotopic Mass, Even Electron Ions

169 formula(e) evaluated with 2 results within limits (all results (up to 1000) for each mass)

Elements Used:

C: 0-150 H: 0-250 N: 2-4 O: 2-4 P: 0-1 S: 0-1 F: 1-1

Padmanabha Kattamuri, PVK-D-6

University of Illinois, SCS, Mass Spectrometry Lab

Qtof\_41971 47 (3.364) AM (Cen,3, 80.00, Ar,15000.0,716.46,0.70,LS 3); Sm (SG, 2x3.00); Cm (47:48)

Q-tof UE521  
1: TOF MS ES+  
2.64e+003

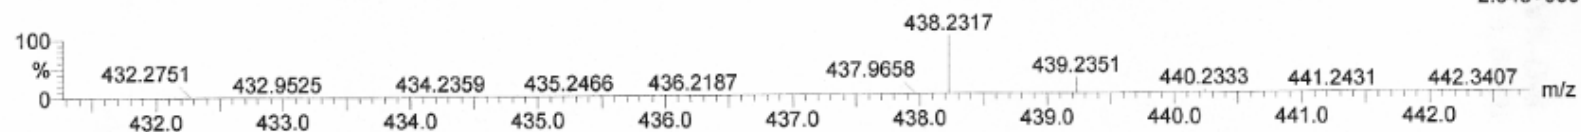

Minimum:

Maximum:

Mass

Calc. Mass

mDa

PPM

DBE

i-FIT

Formula

438.2317

438.2322

-0.5

-1.1

7.5

0.3

C22 H34 N3 O3 P F

438.2356

-3.9

-8.9

2.5

61.5

C19 H38 N3 O3 P S F



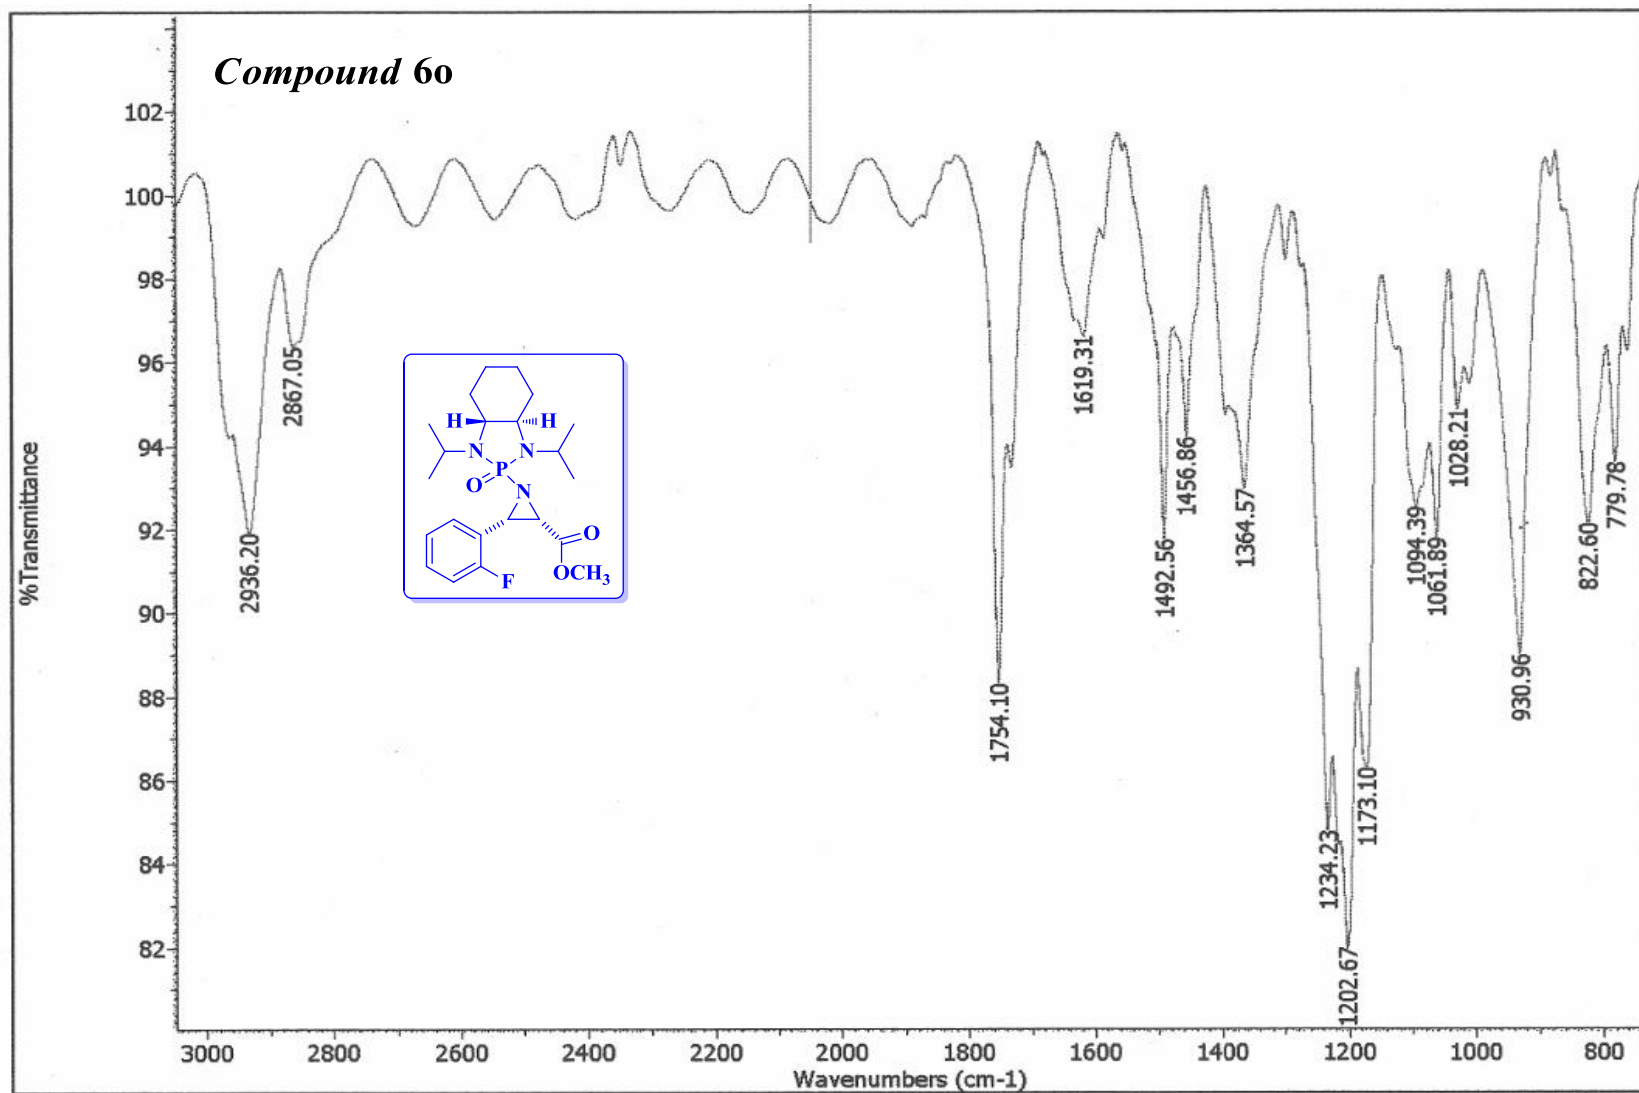

### Compound 6p

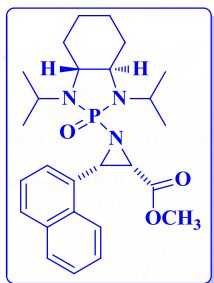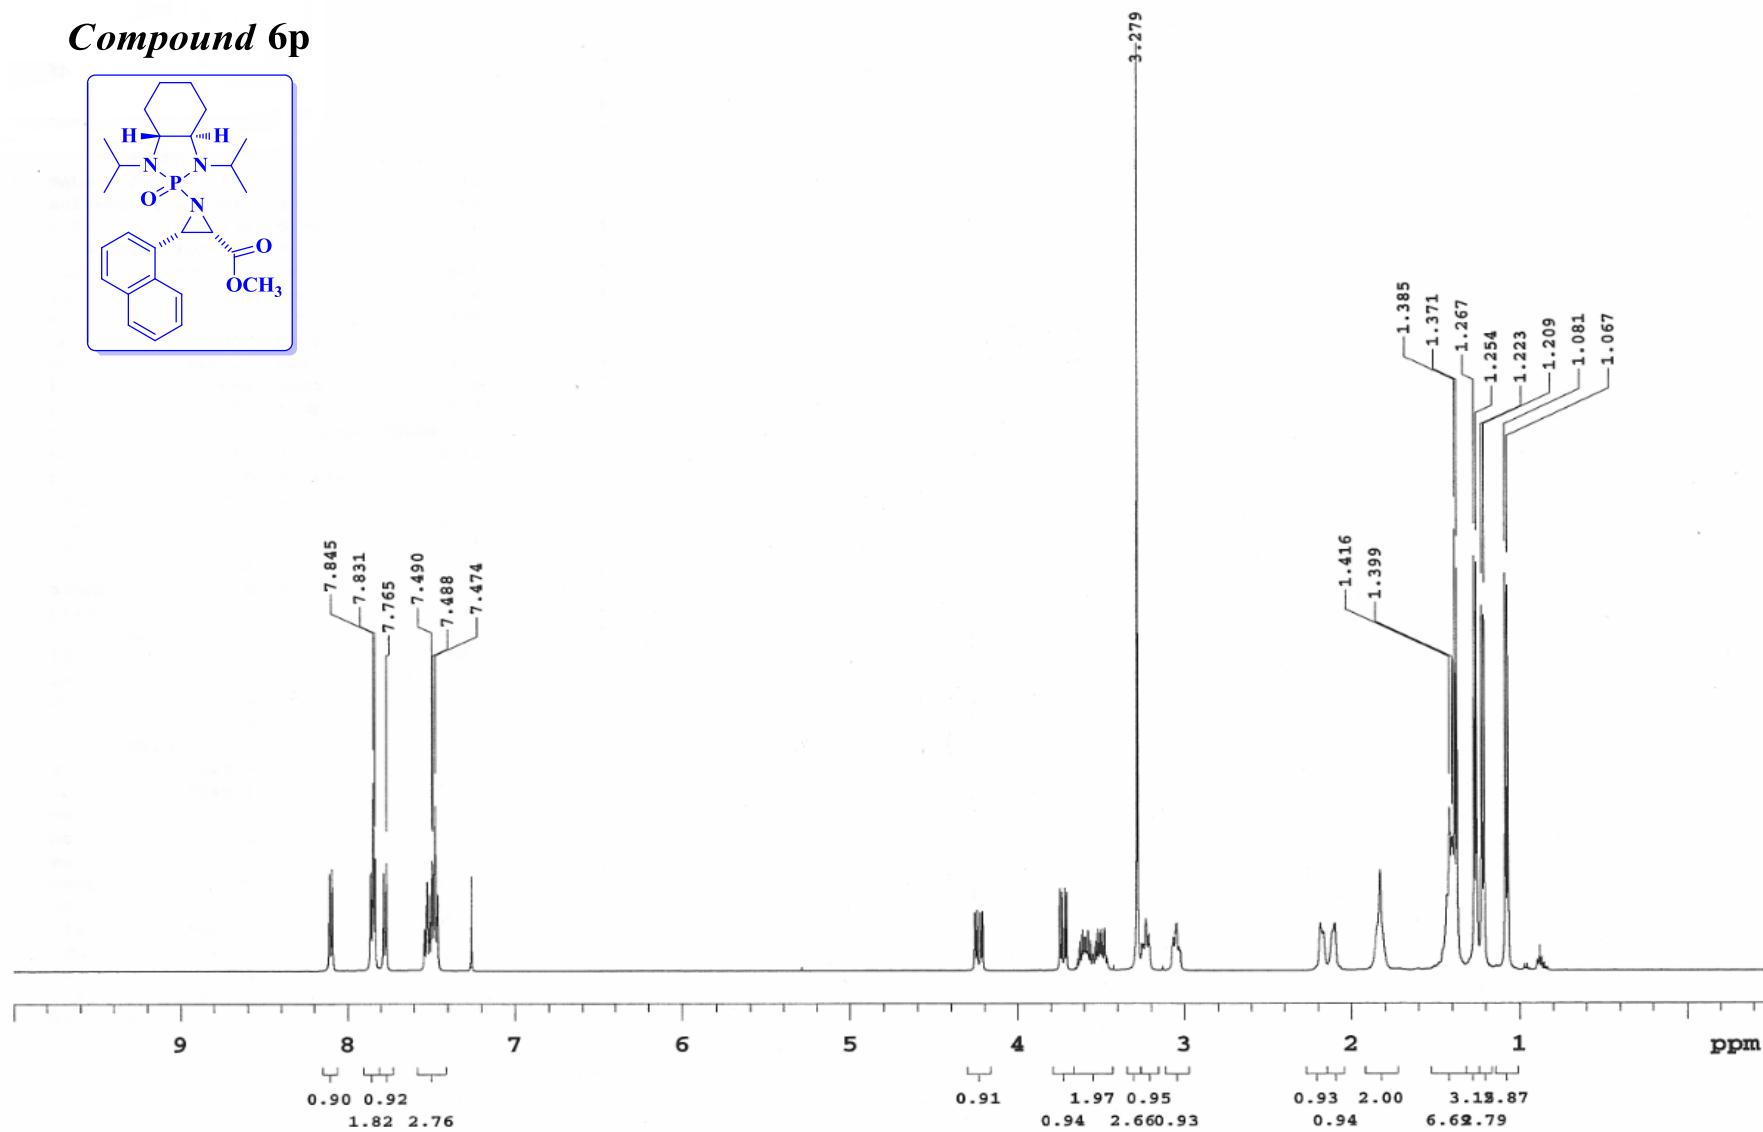

**Compound 6p**

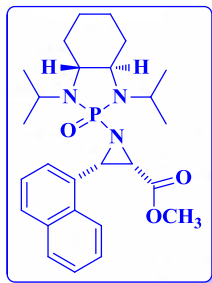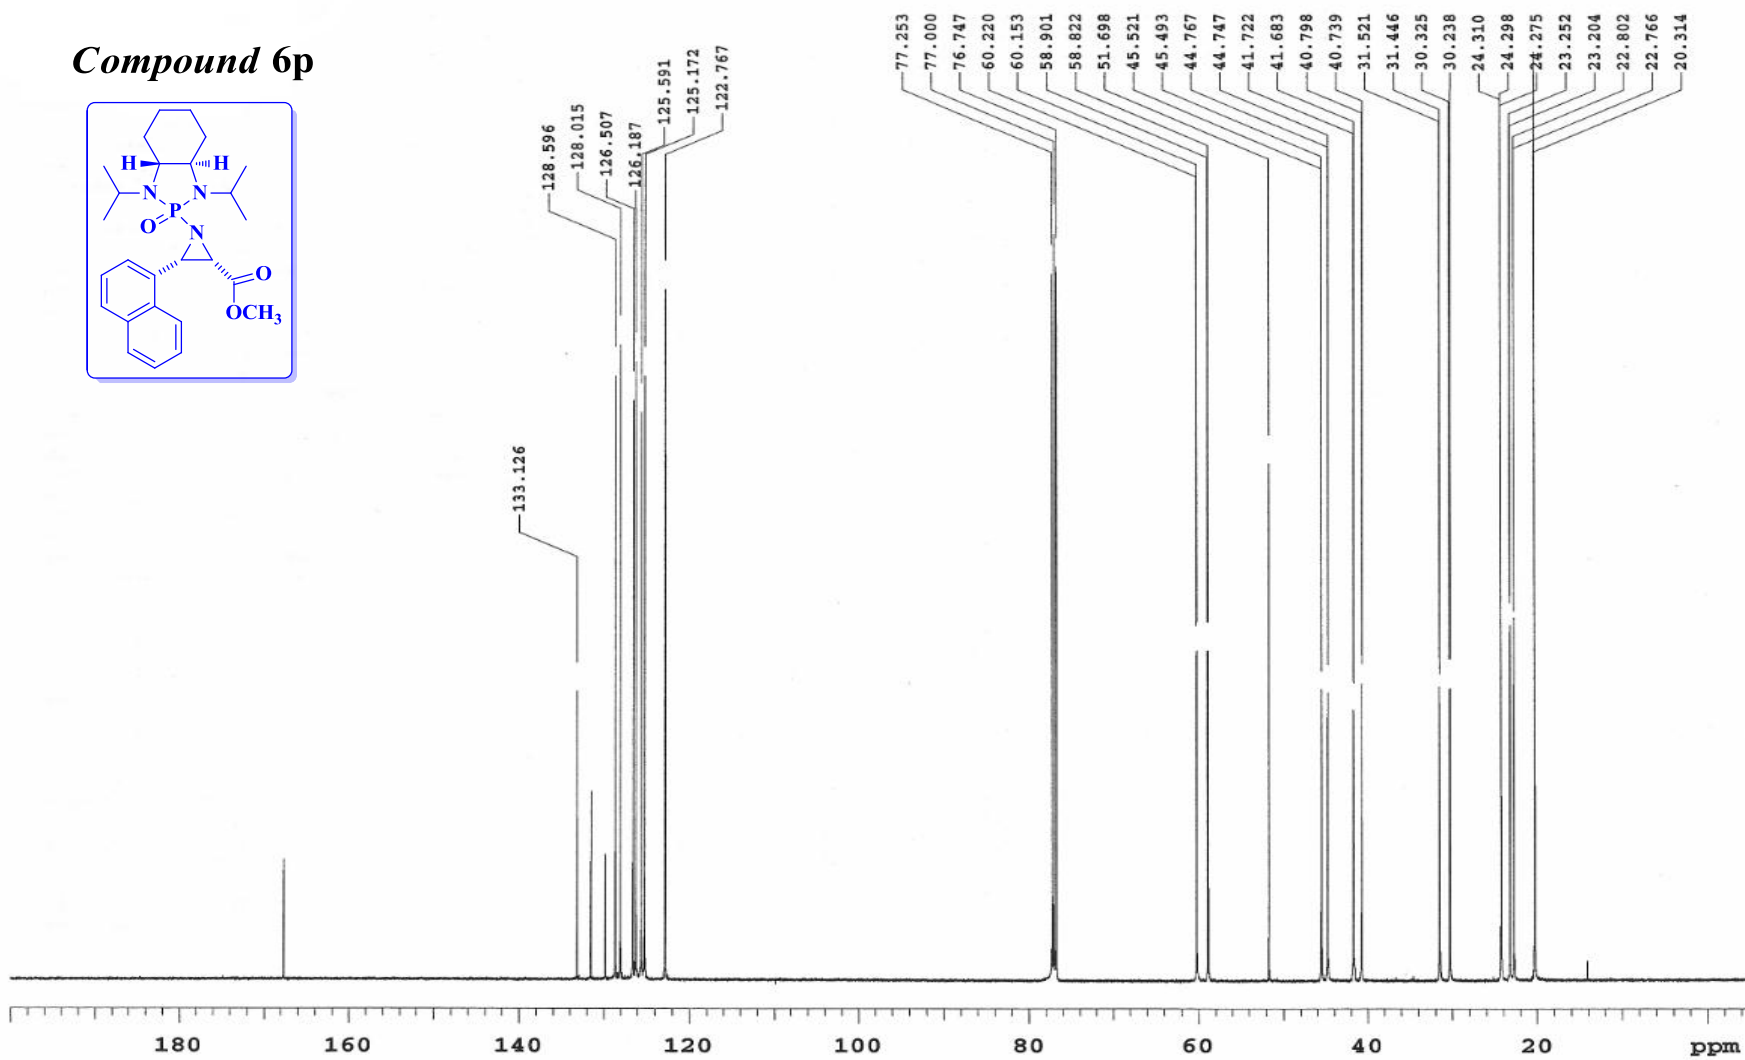

**Compound 6p**

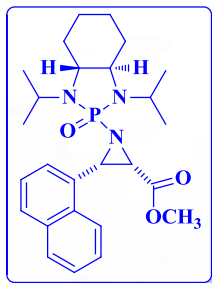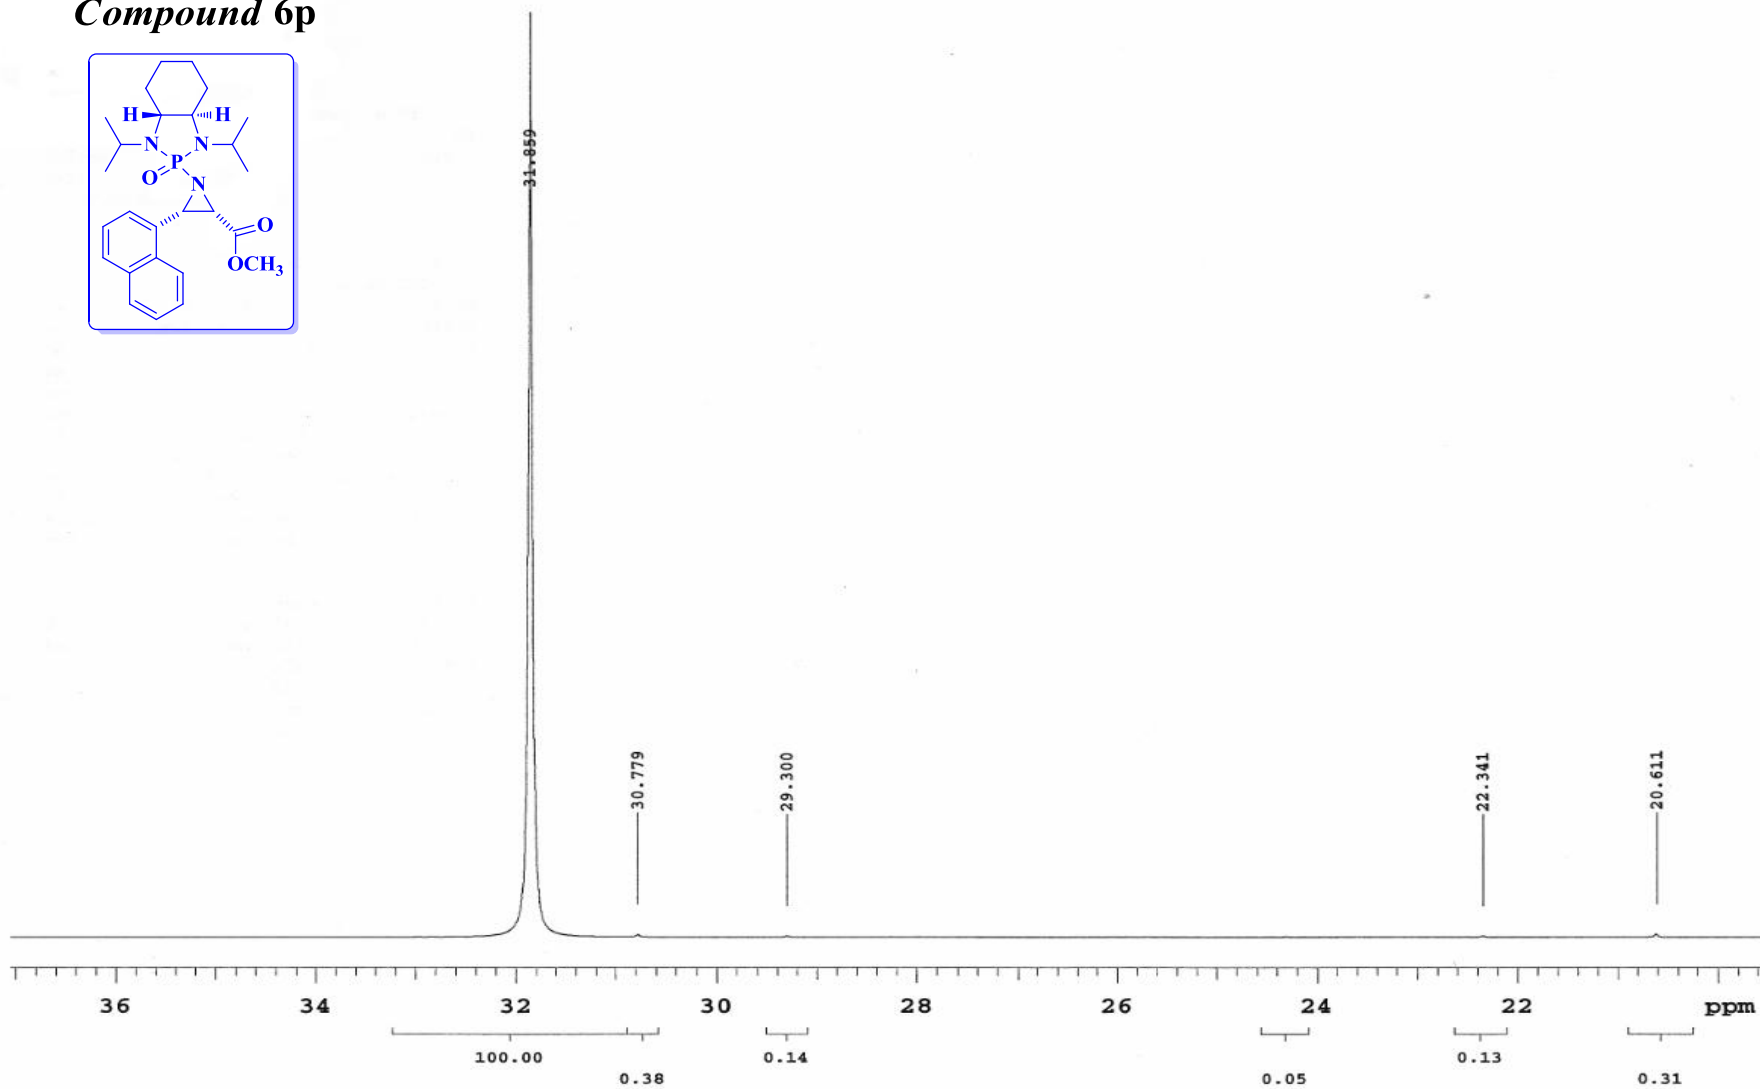

Padmanabha Kattamuri, PVK-D-53(B) University of Illinois, SCS, Mass Spectrometry Lab  
Qtof\_41968 36 (2.578) AM (Cen,5, 80.00, Ar,15000.0,0.00,0.70); Sm (SG, 2x5.00); Cm (36-10:12x8.000)

Q-tof UE521  
1: TOF MS ES+  
8.99e3

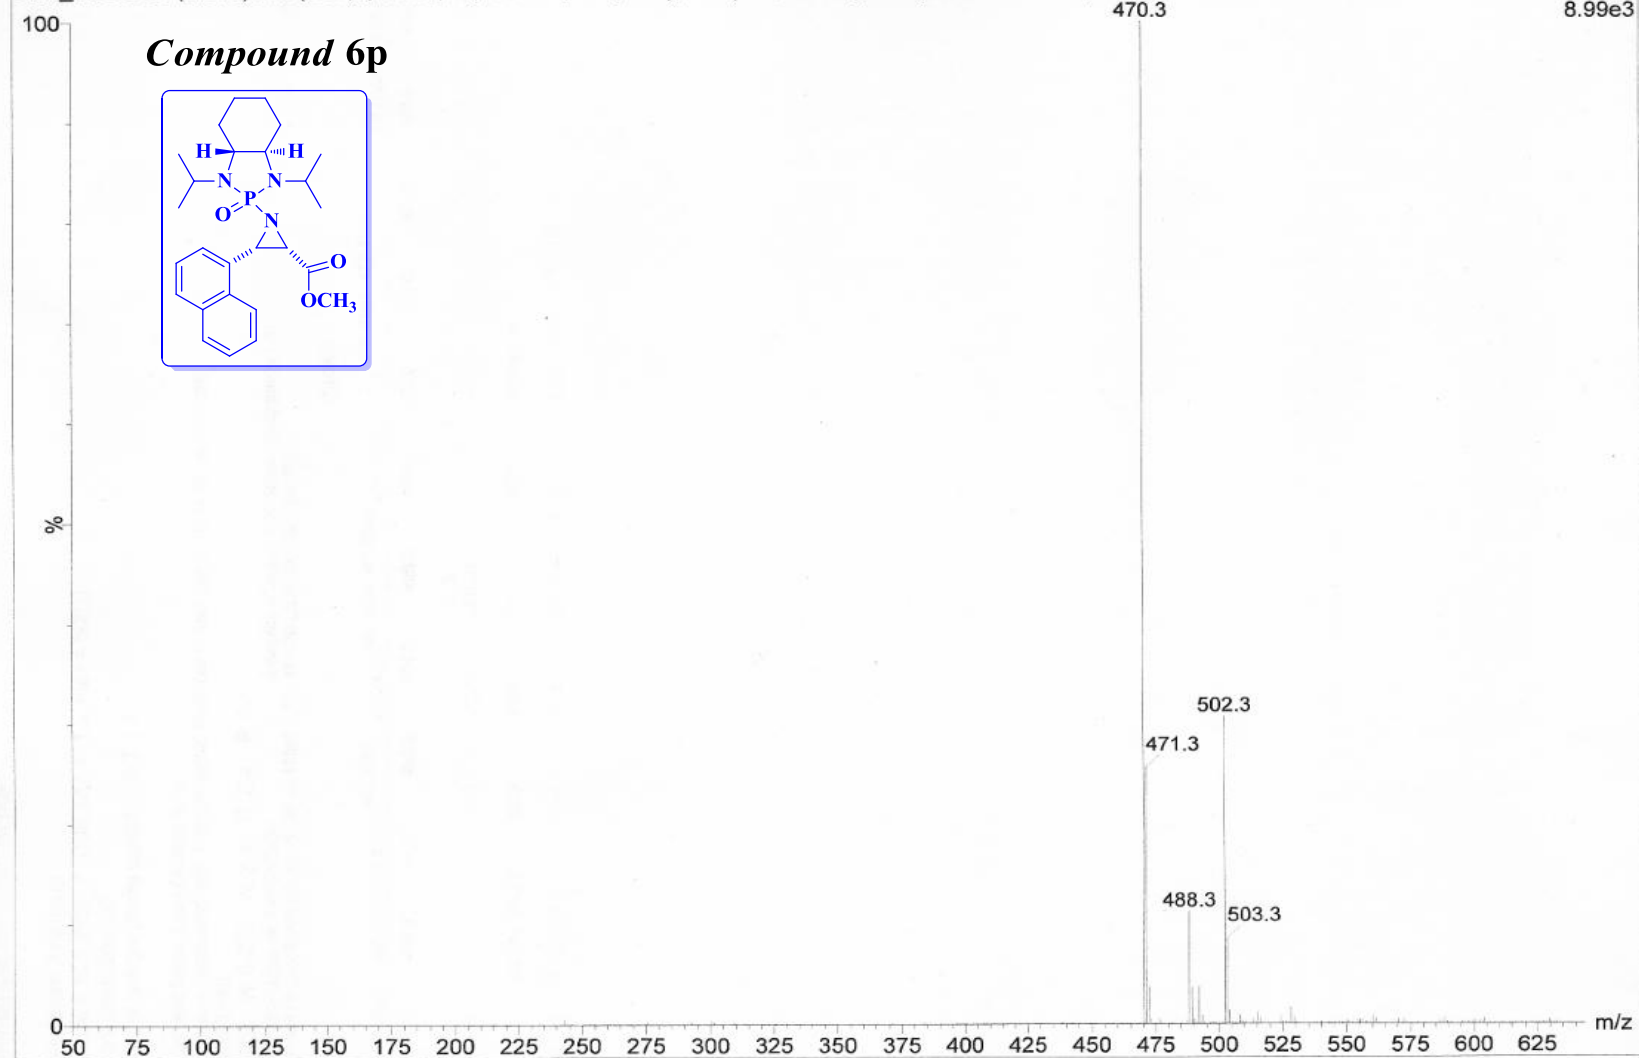

## Elemental Composition Report

Page 1

### Single Mass Analysis

Tolerance = 10.0 PPM / DBE: min = -1.5, max = 600.0

Element prediction: Off

Number of isotope peaks used for i-FIT = 3

Monoisotopic Mass, Even Electron Ions

103 formula(e) evaluated with 1 results within limits (all results (up to 1000) for each mass)

Elements Used:

C: 0-150 H: 0-250 N: 2-4 O: 2-4 P: 0-1

Padmanabha Kattamuri, PVK-D-53(B)

University of Illinois, SCS, Mass Spectrometry Lab

Q-tof UE521

Qtof\_41968 54 (3.864) AM (Cen,3, 80.00, Ar,15000.0,716.46,0.70,LS 3); Sm (SG, 2x3.00)

1: TOF MS ES+

4.97e+002

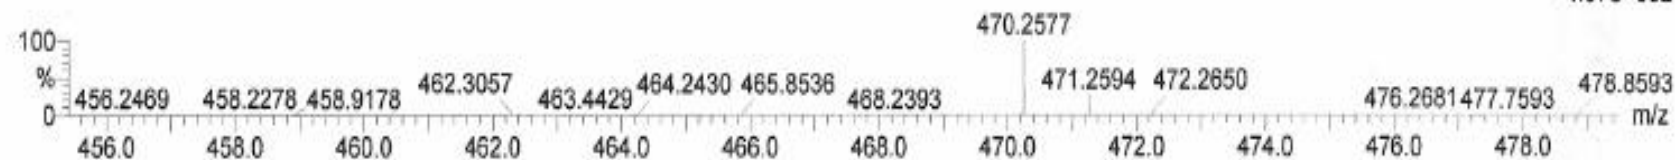

Minimum:

-1.5

Maximum:

5.0

10.0

600.0

| Mass     | Calc. Mass | mDa | PPM | DBE  | i-FIT | Formula         |
|----------|------------|-----|-----|------|-------|-----------------|
| 470.2577 | 470.2573   | 0.4 | 0.9 | 10.5 | 0.9   | C26 H37 N3 O3 P |

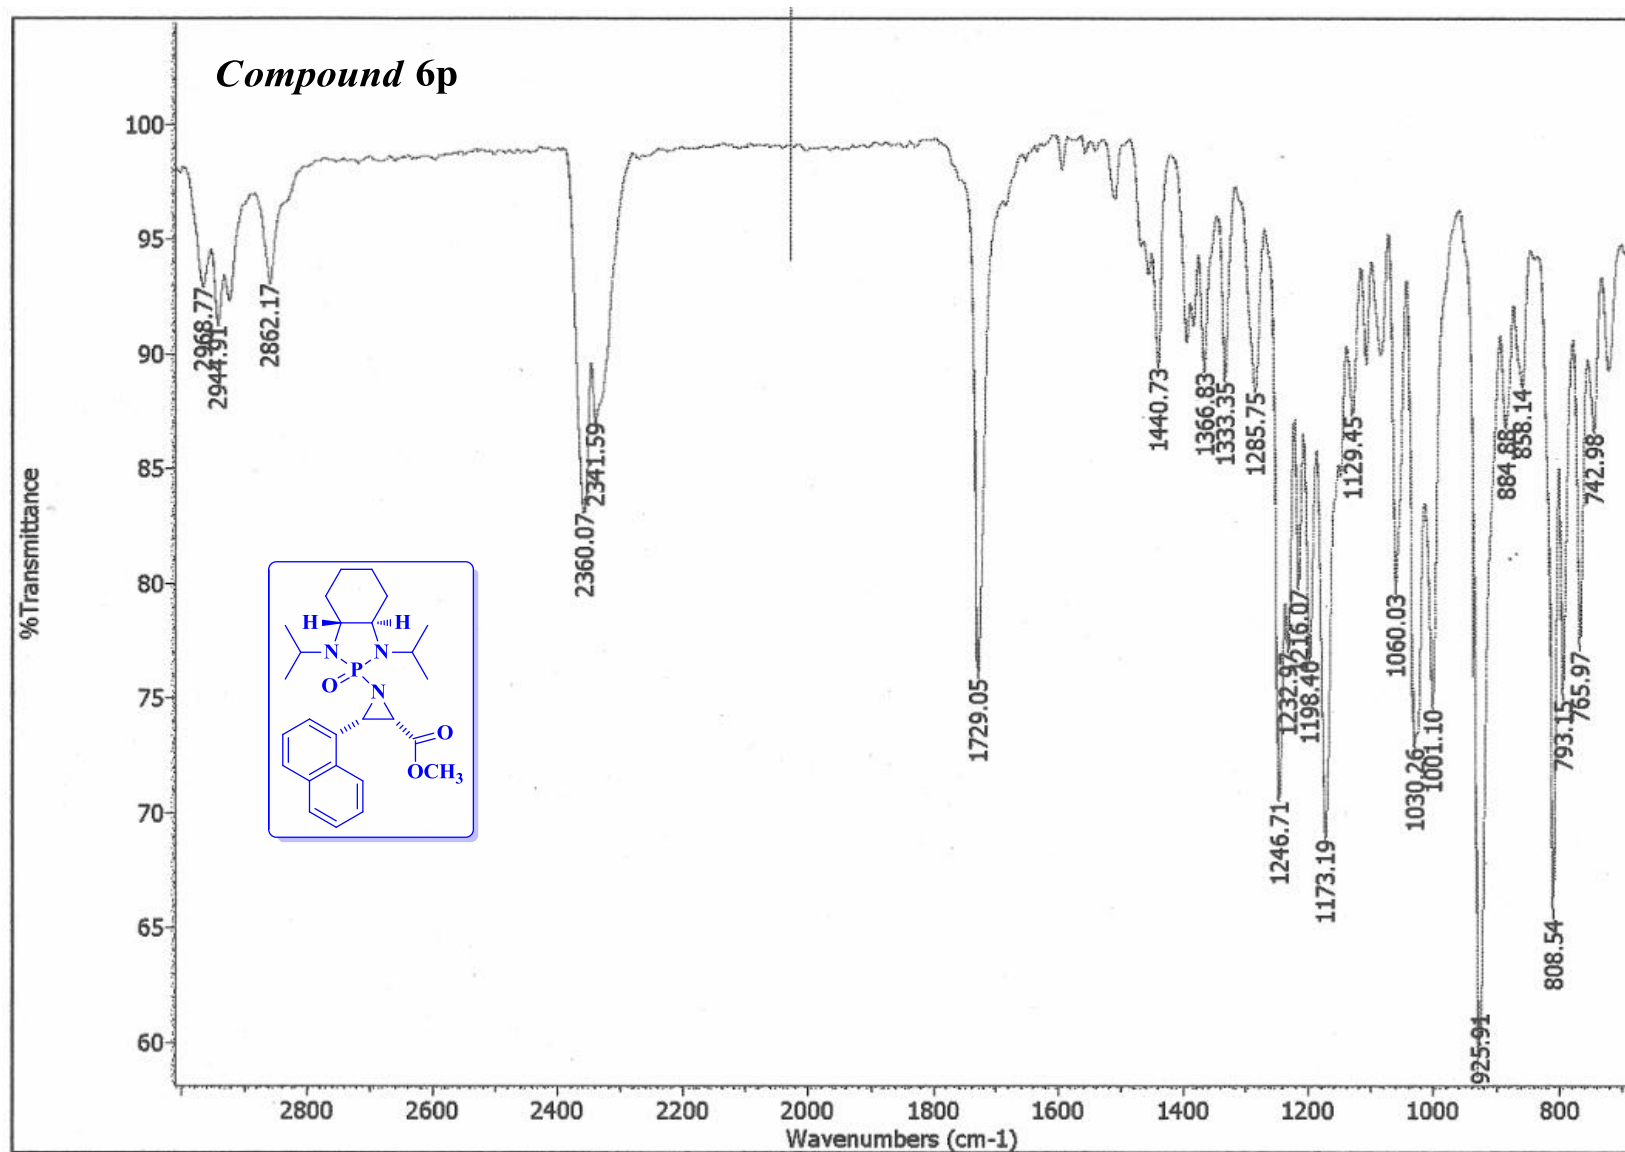

### Compound 6q

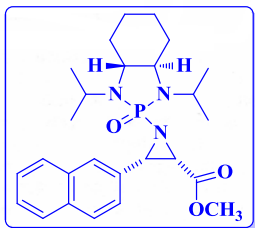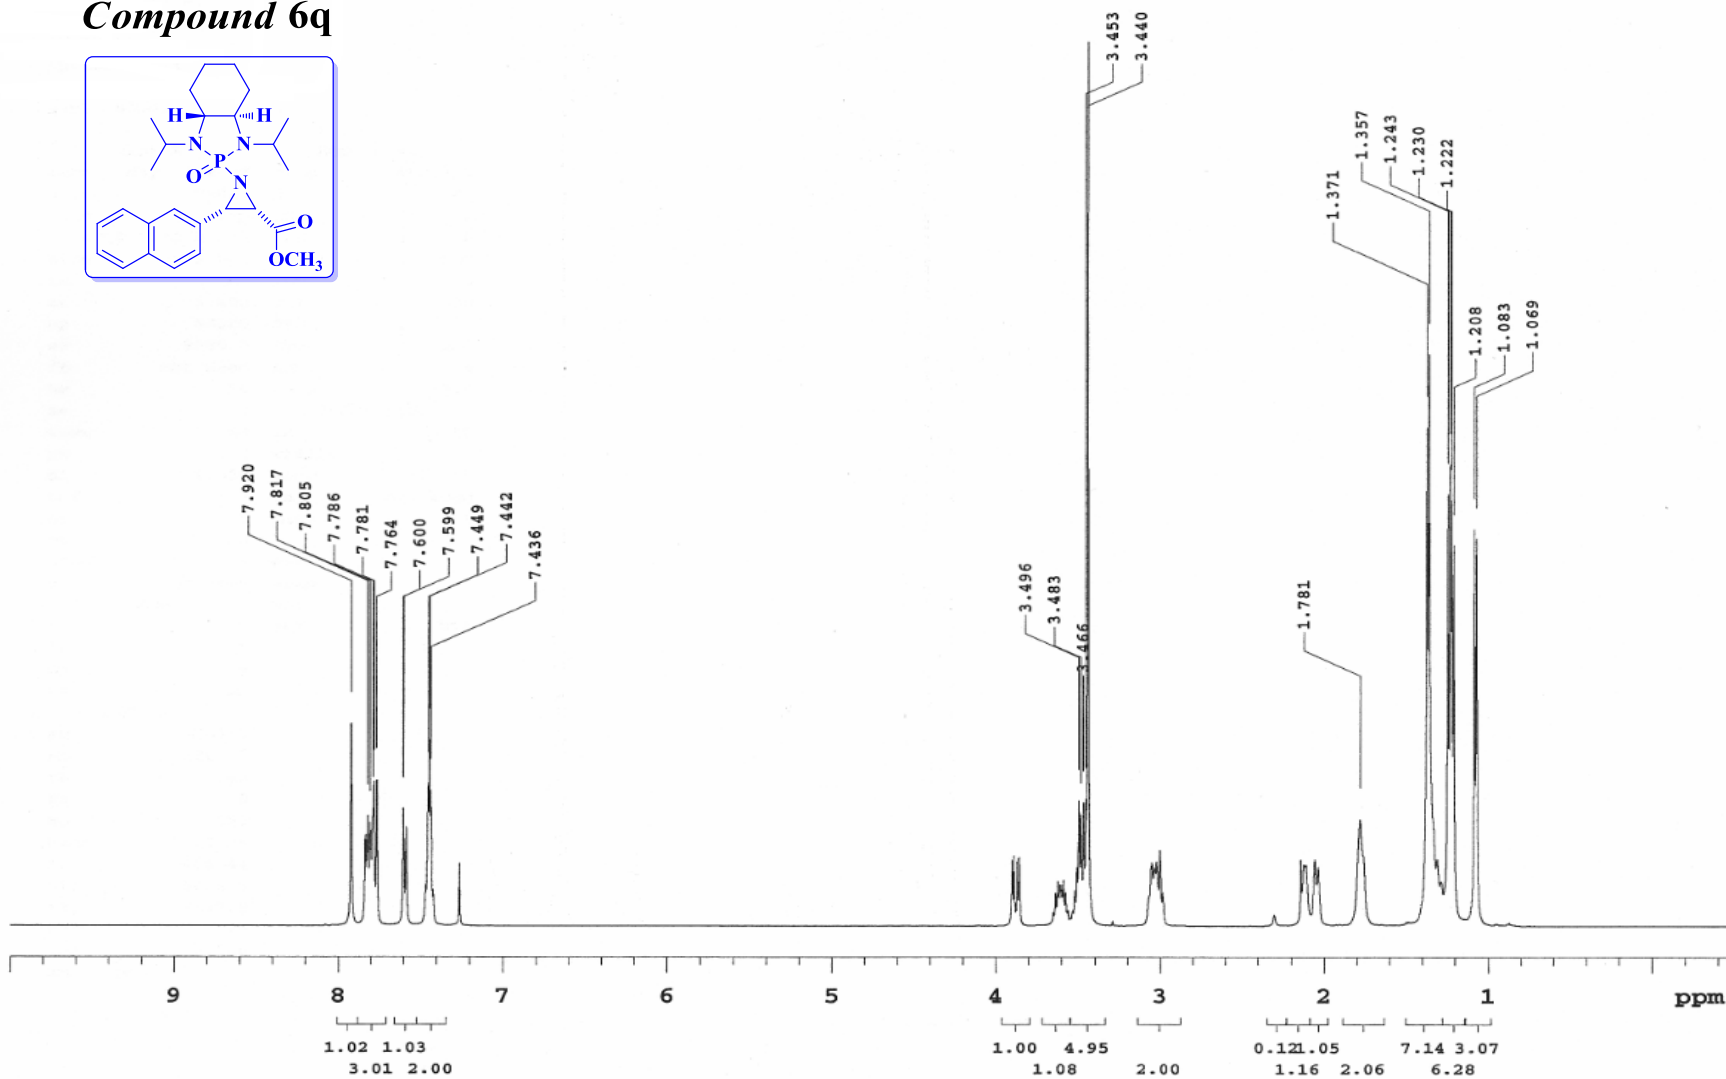



### Compound 6q

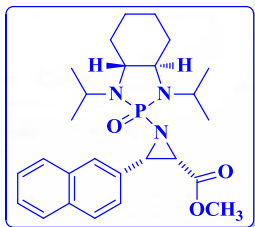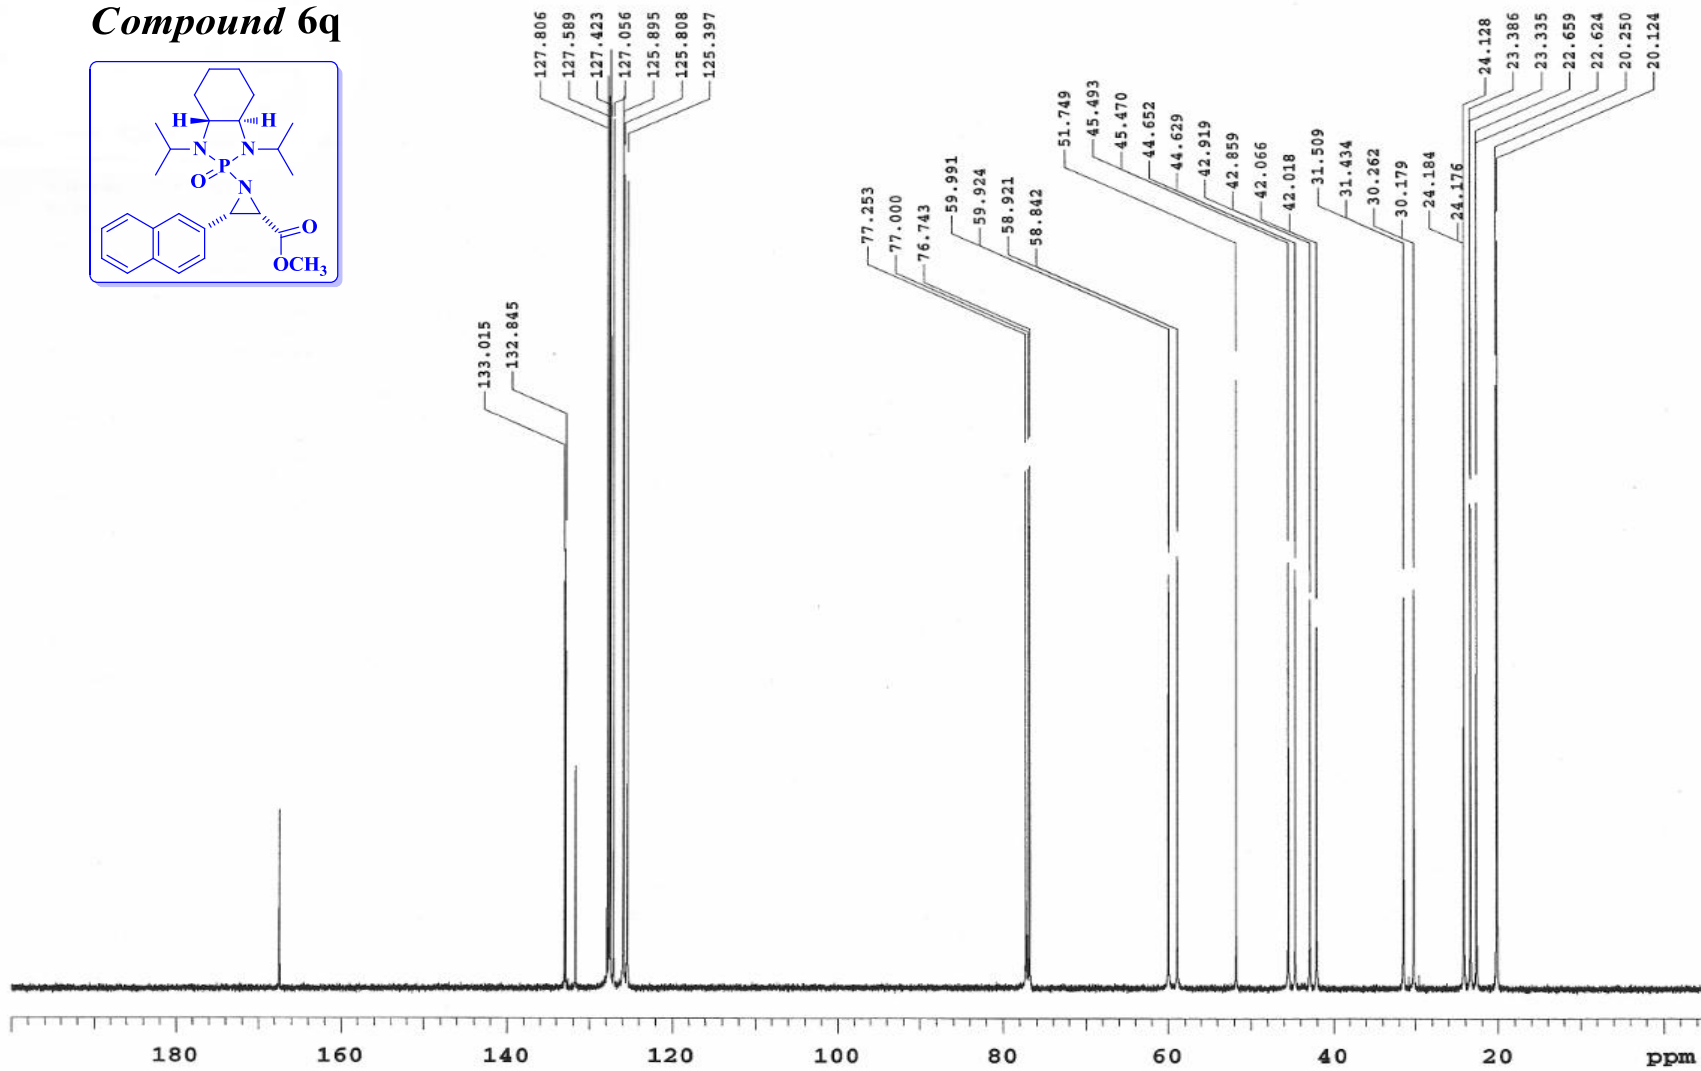

**Compound 6q**

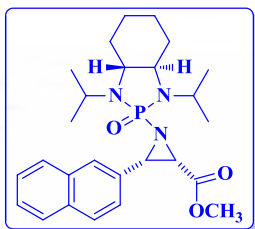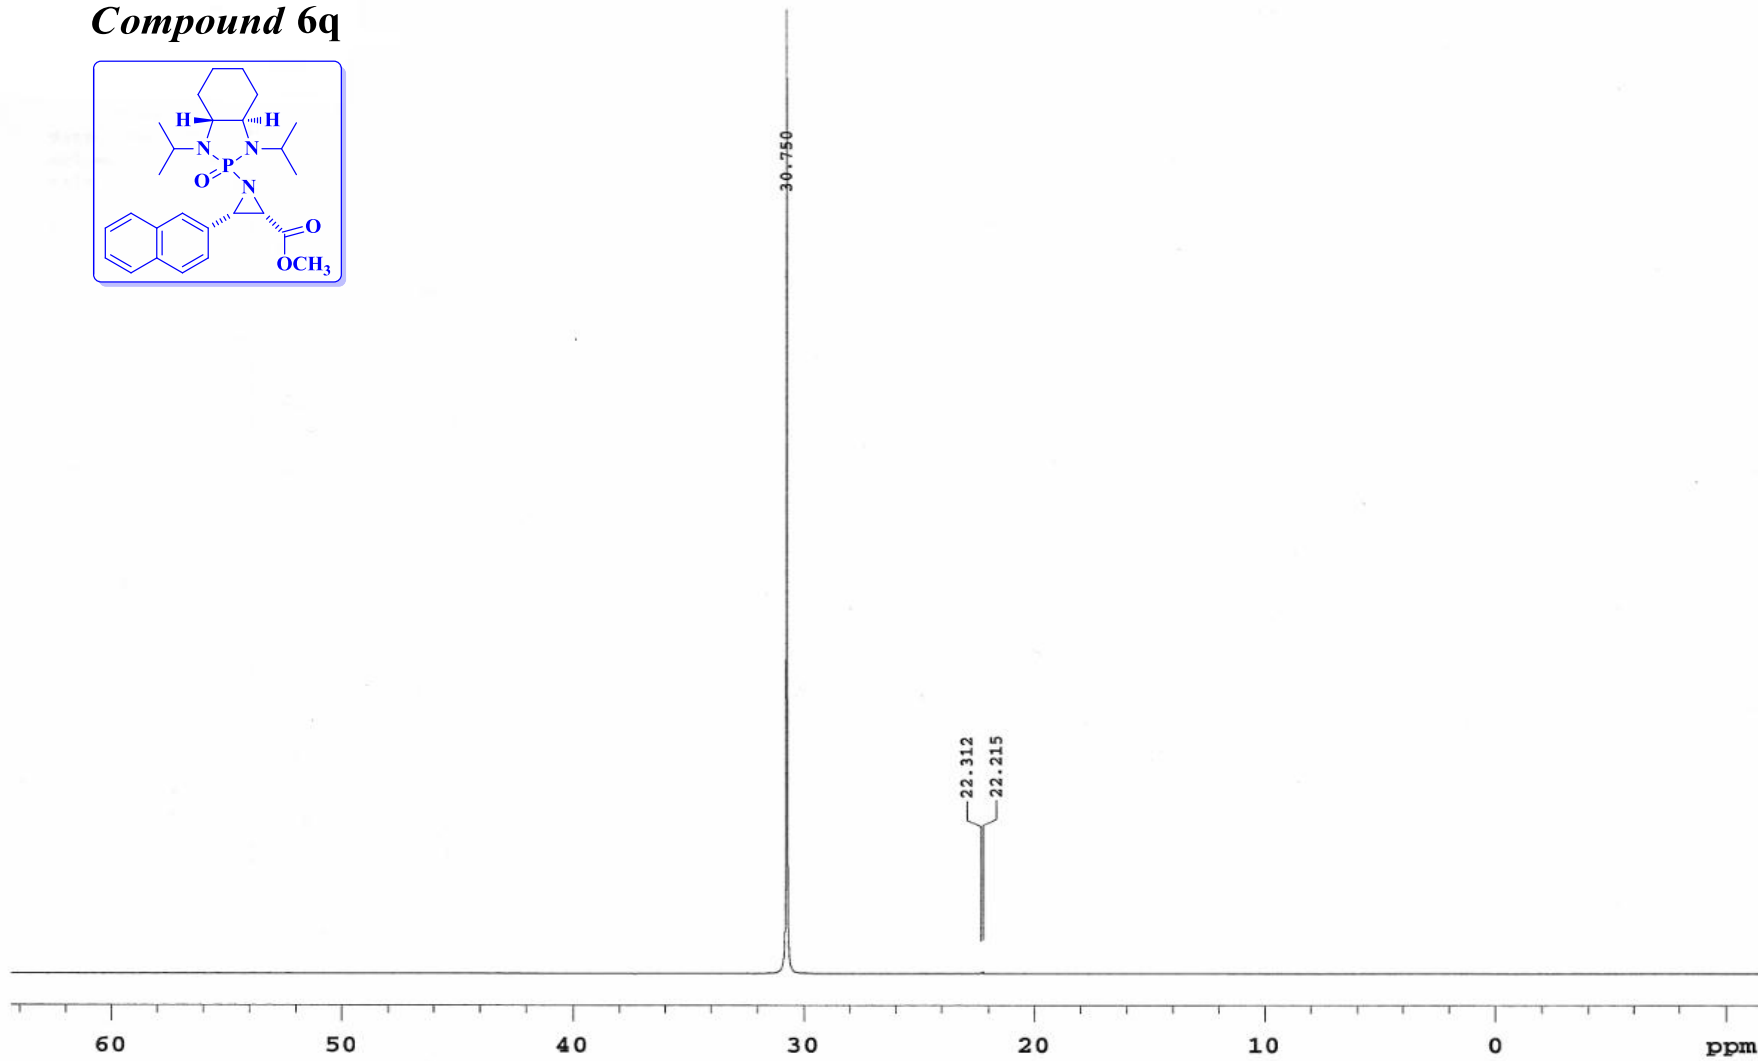

Padmanabha Kattamuri, PVK-D-67(A) University of Illinois, SCS, Mass Spectrometry Lab  
Qtof\_41972 42 (3.007) AM (Cen,3, 80.00, Ar,15000.0,716.46,0.70,LS 3); Sm (SG, 2x3.00); Cm (42:45)

Q-tof UE521  
1: TOF MS ES+  
1.68e4

**Compound 6q**

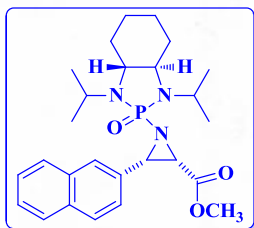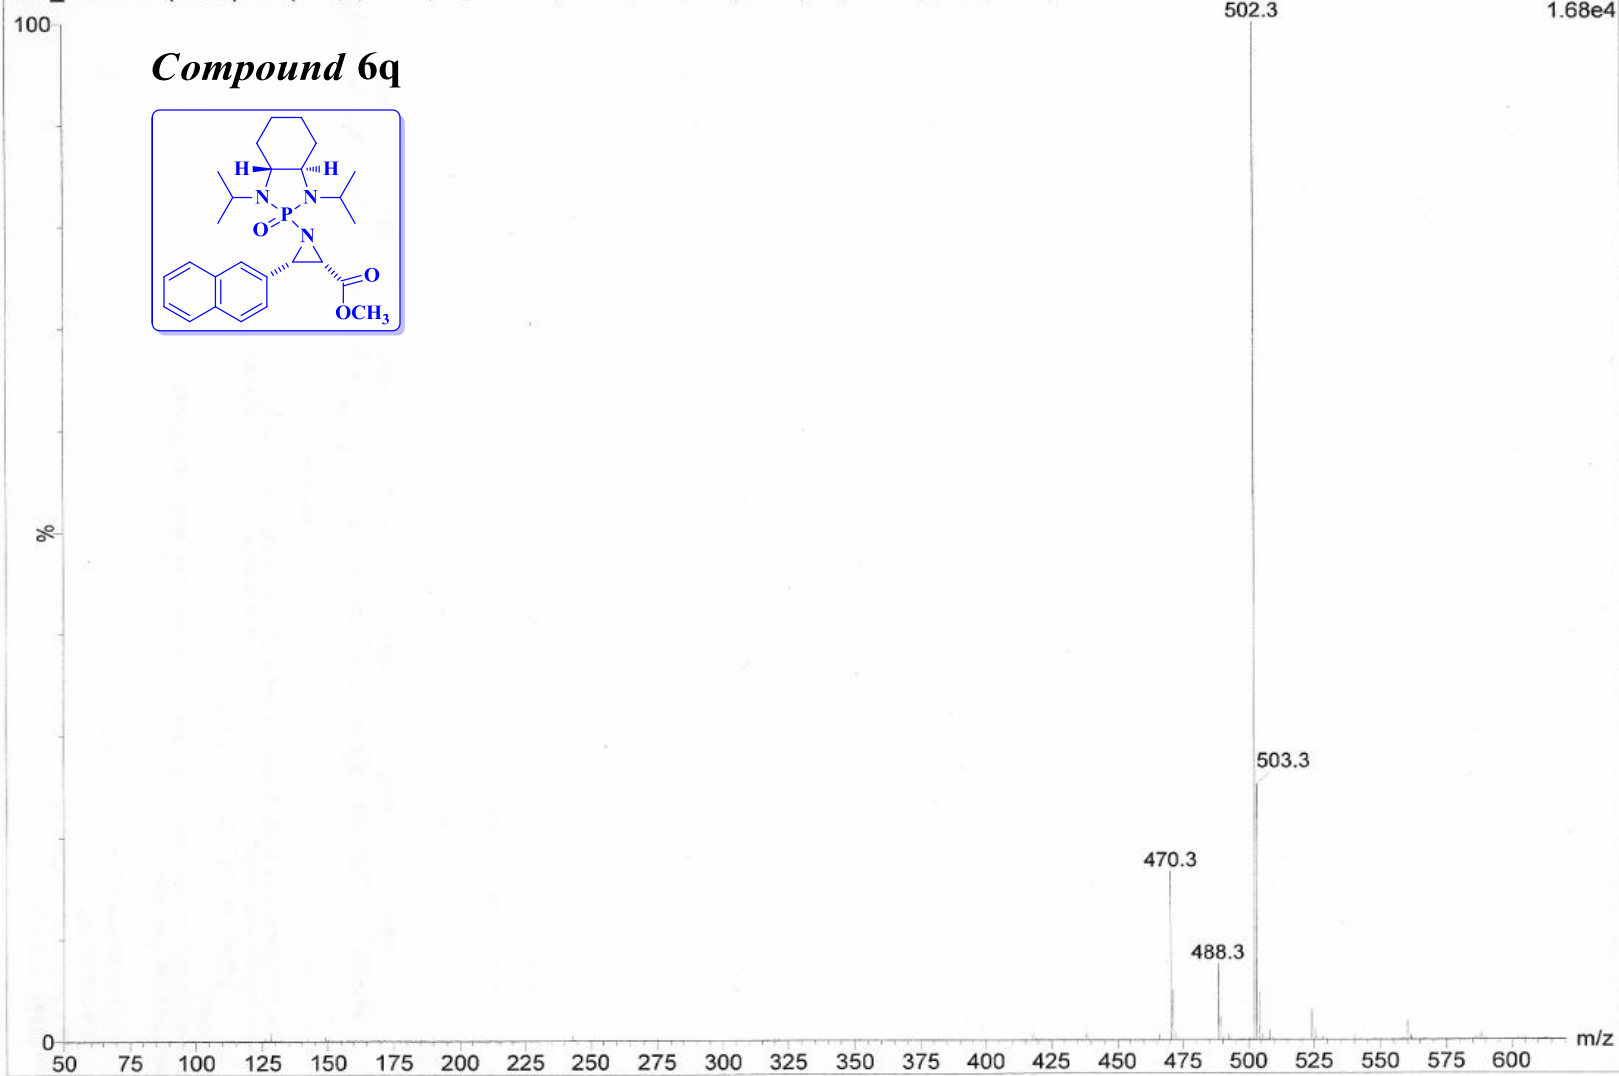

## Elemental Composition Report

Page 1

### Single Mass Analysis

Tolerance = 10.0 PPM / DBE: min = -1.5, max = 600.0

Element prediction: Off

Number of isotope peaks used for i-FIT = 3

Monoisotopic Mass, Even Electron Ions

103 formula(e) evaluated with 1 results within limits (all results (up to 1000) for each mass)

Elements Used:

C: 0-150 H: 0-250 N: 2-4 O: 2-4 P: 0-1

Padmanabha Kattamuri, PVK-D-67(A)

University of Illinois, SCS, Mass Spectrometry Lab

Qtof\_41872 42 (3.007) AM (Cen.3, 80.00, Ar,15000.0,716.46,0.70,LS 3); Sm (SG, 2x3.00); Cm (42:45)

Q-tof UE521

1: TOF MS ES+

2.78e+003

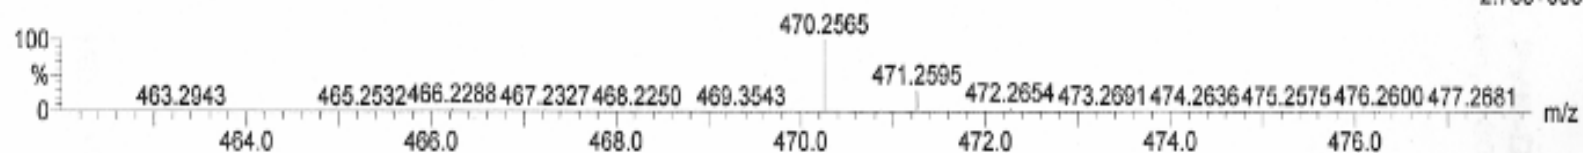

Minimum: -1.5  
Maximum: 5.0 10.0 600.0

| Mass     | Calc. Mass | mDa  | PPM  | DBE  | i-FIT | Formula         |
|----------|------------|------|------|------|-------|-----------------|
| 470.2565 | 470.2573   | -0.8 | -1.7 | 10.5 | 1.1   | C26 H37 N3 O3 P |

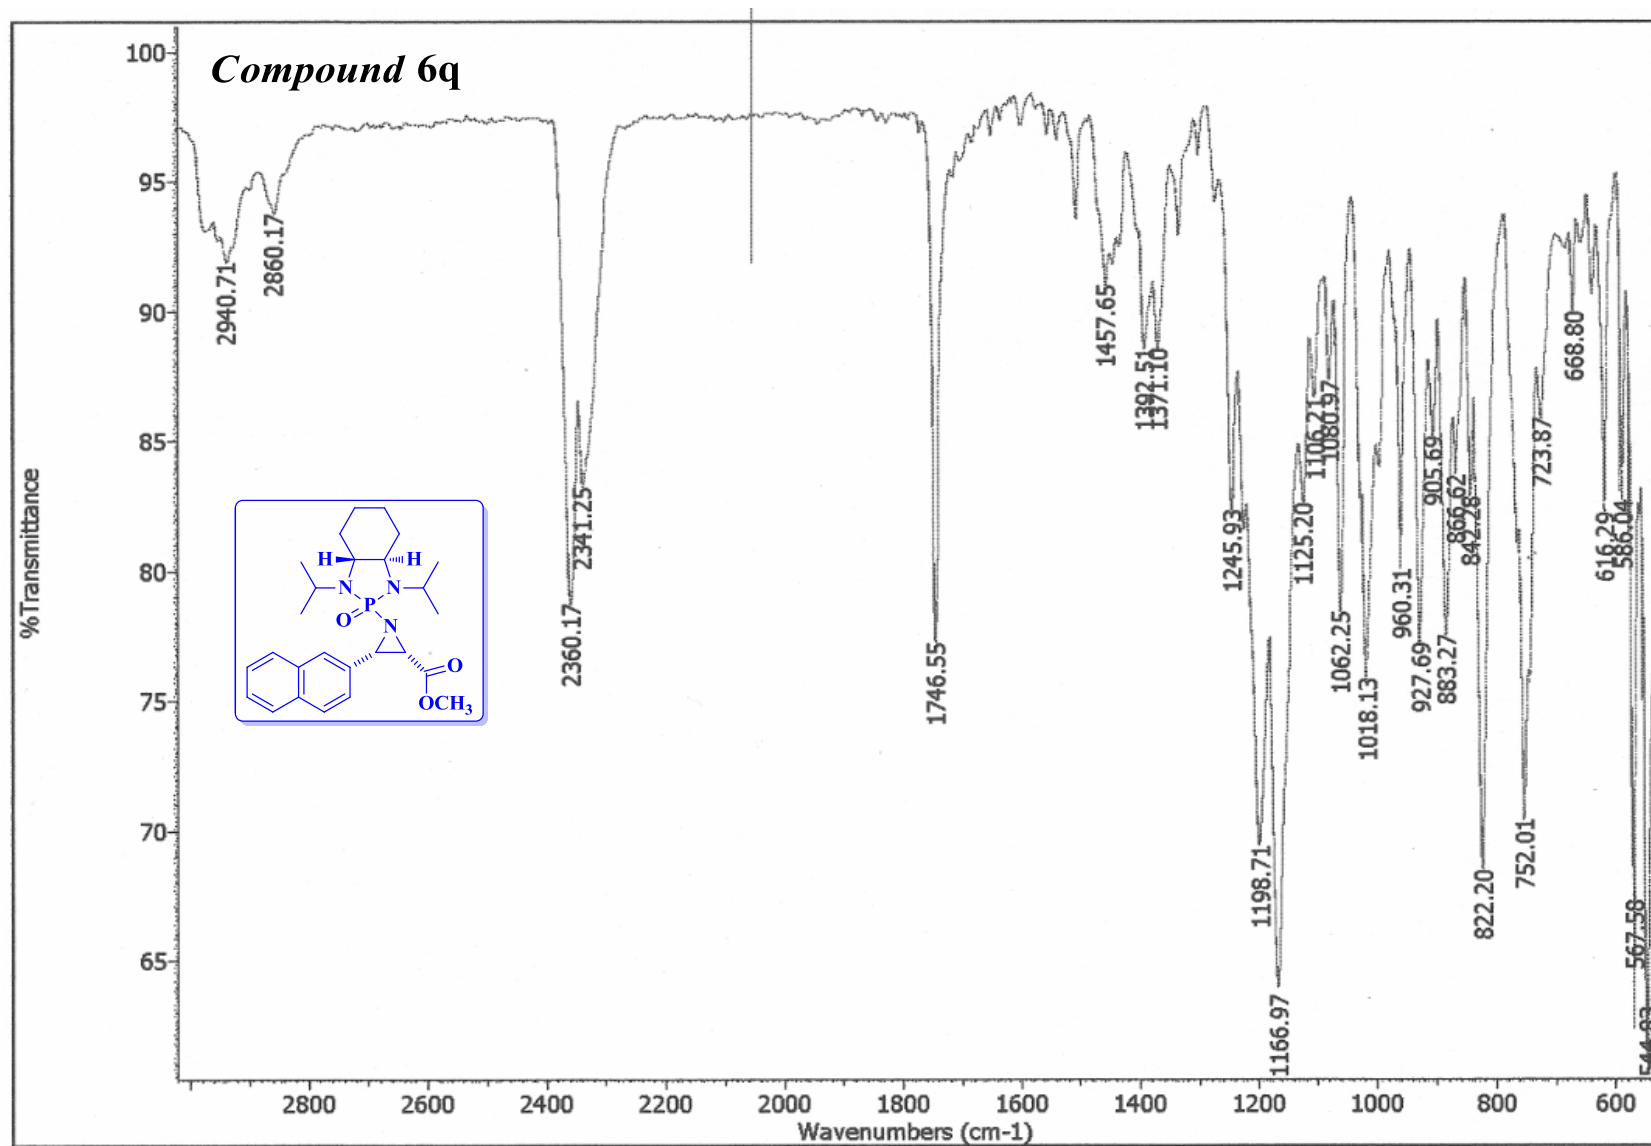

### Compound 6r

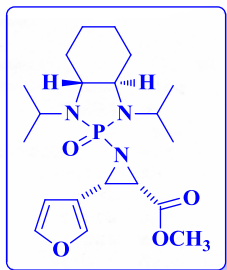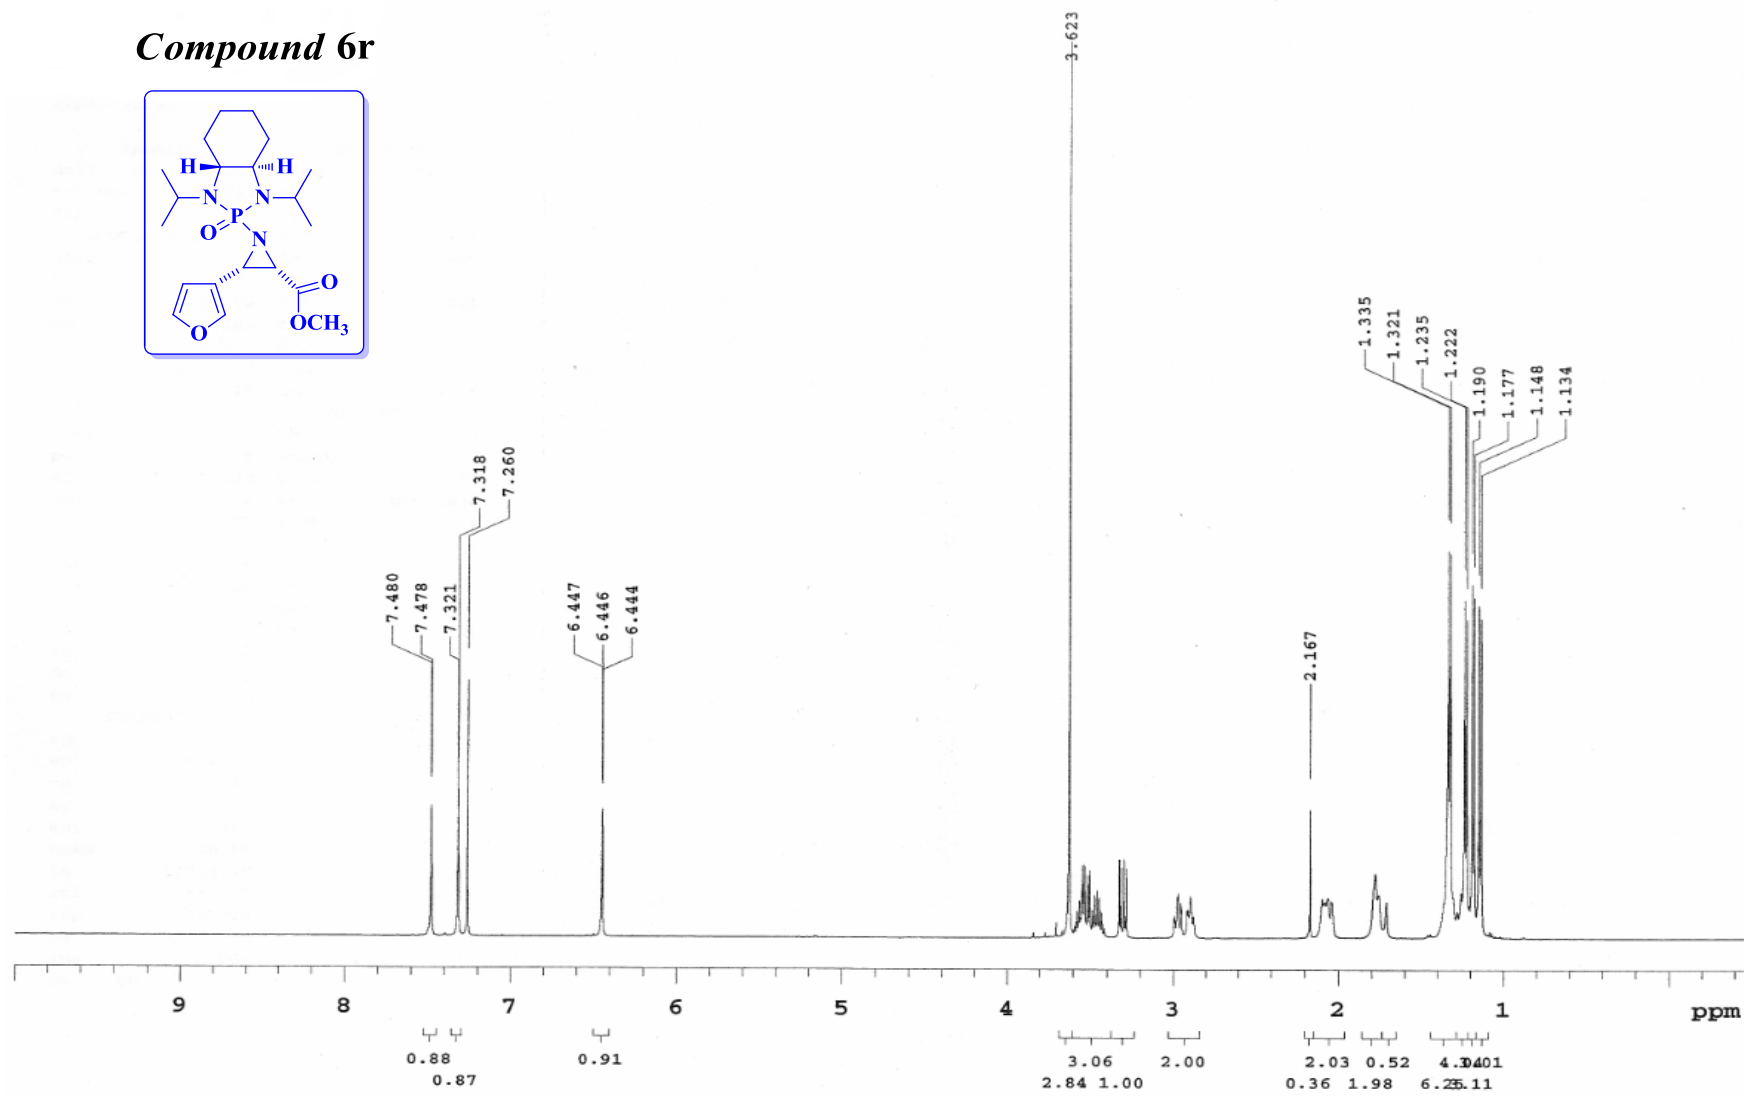

### Compound 6r

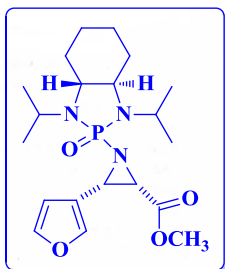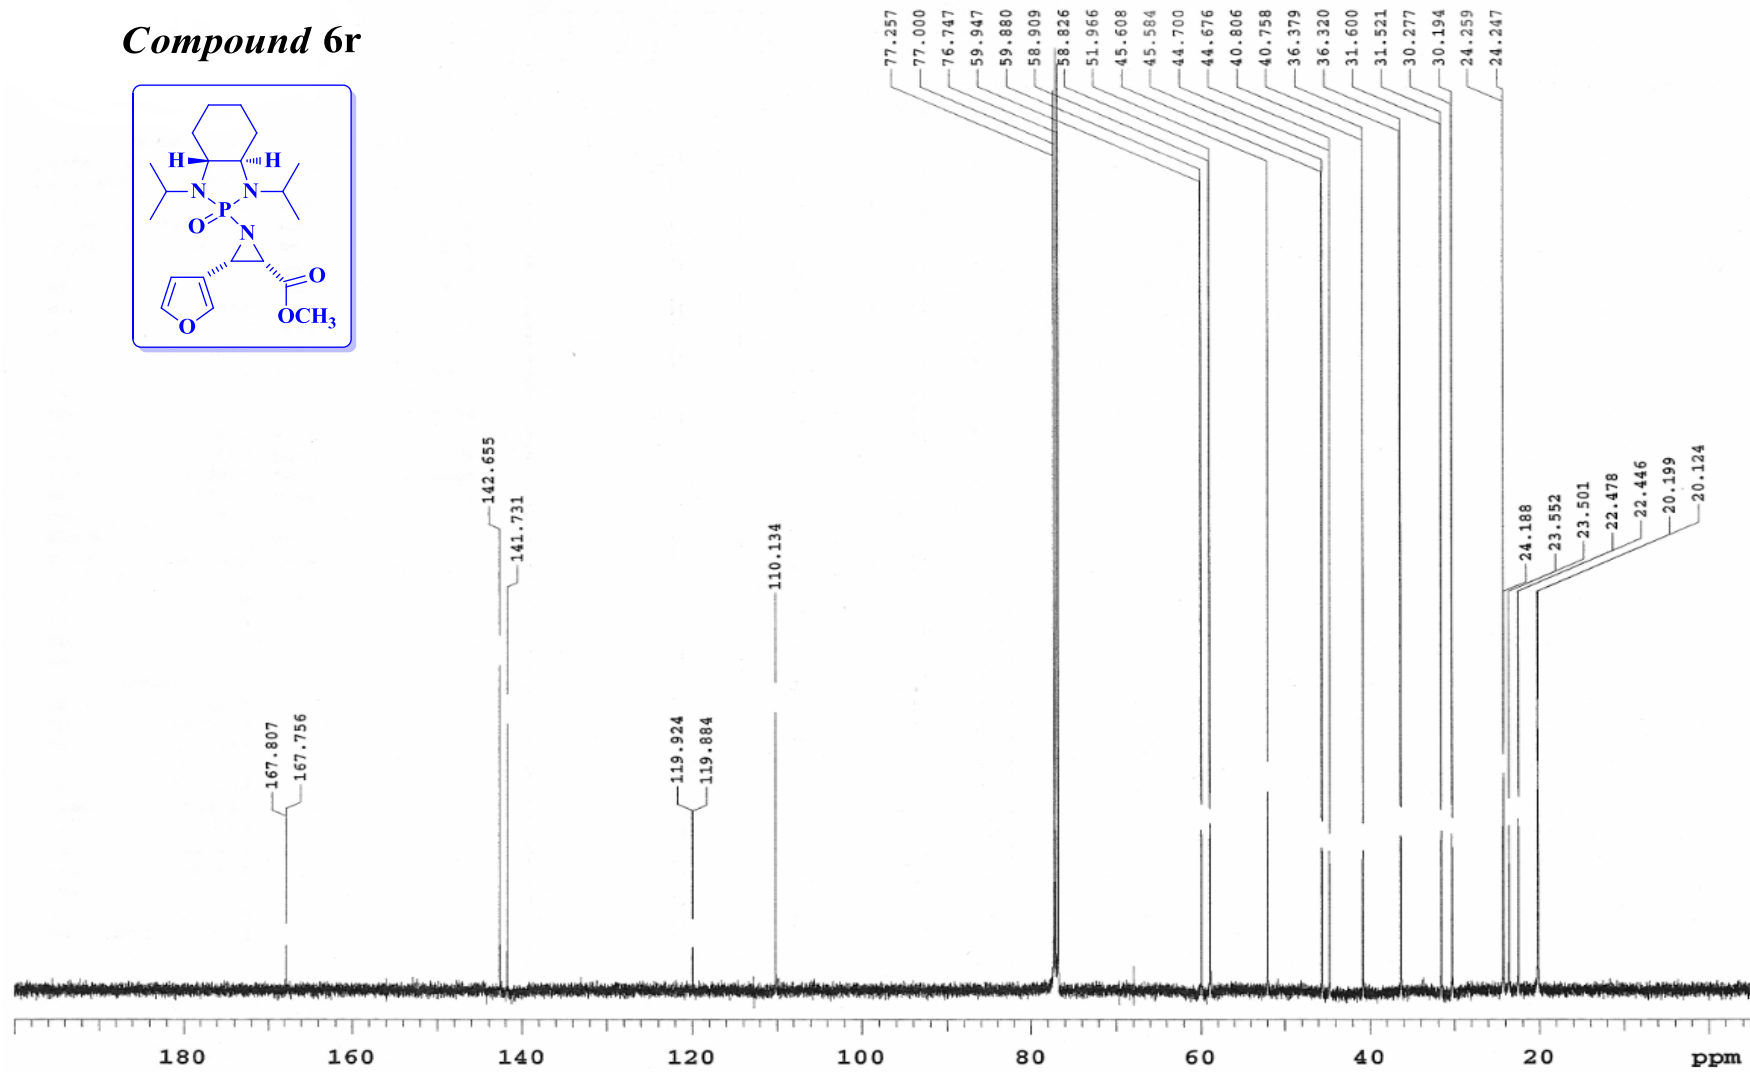

**Compound 6r**

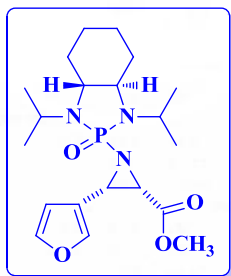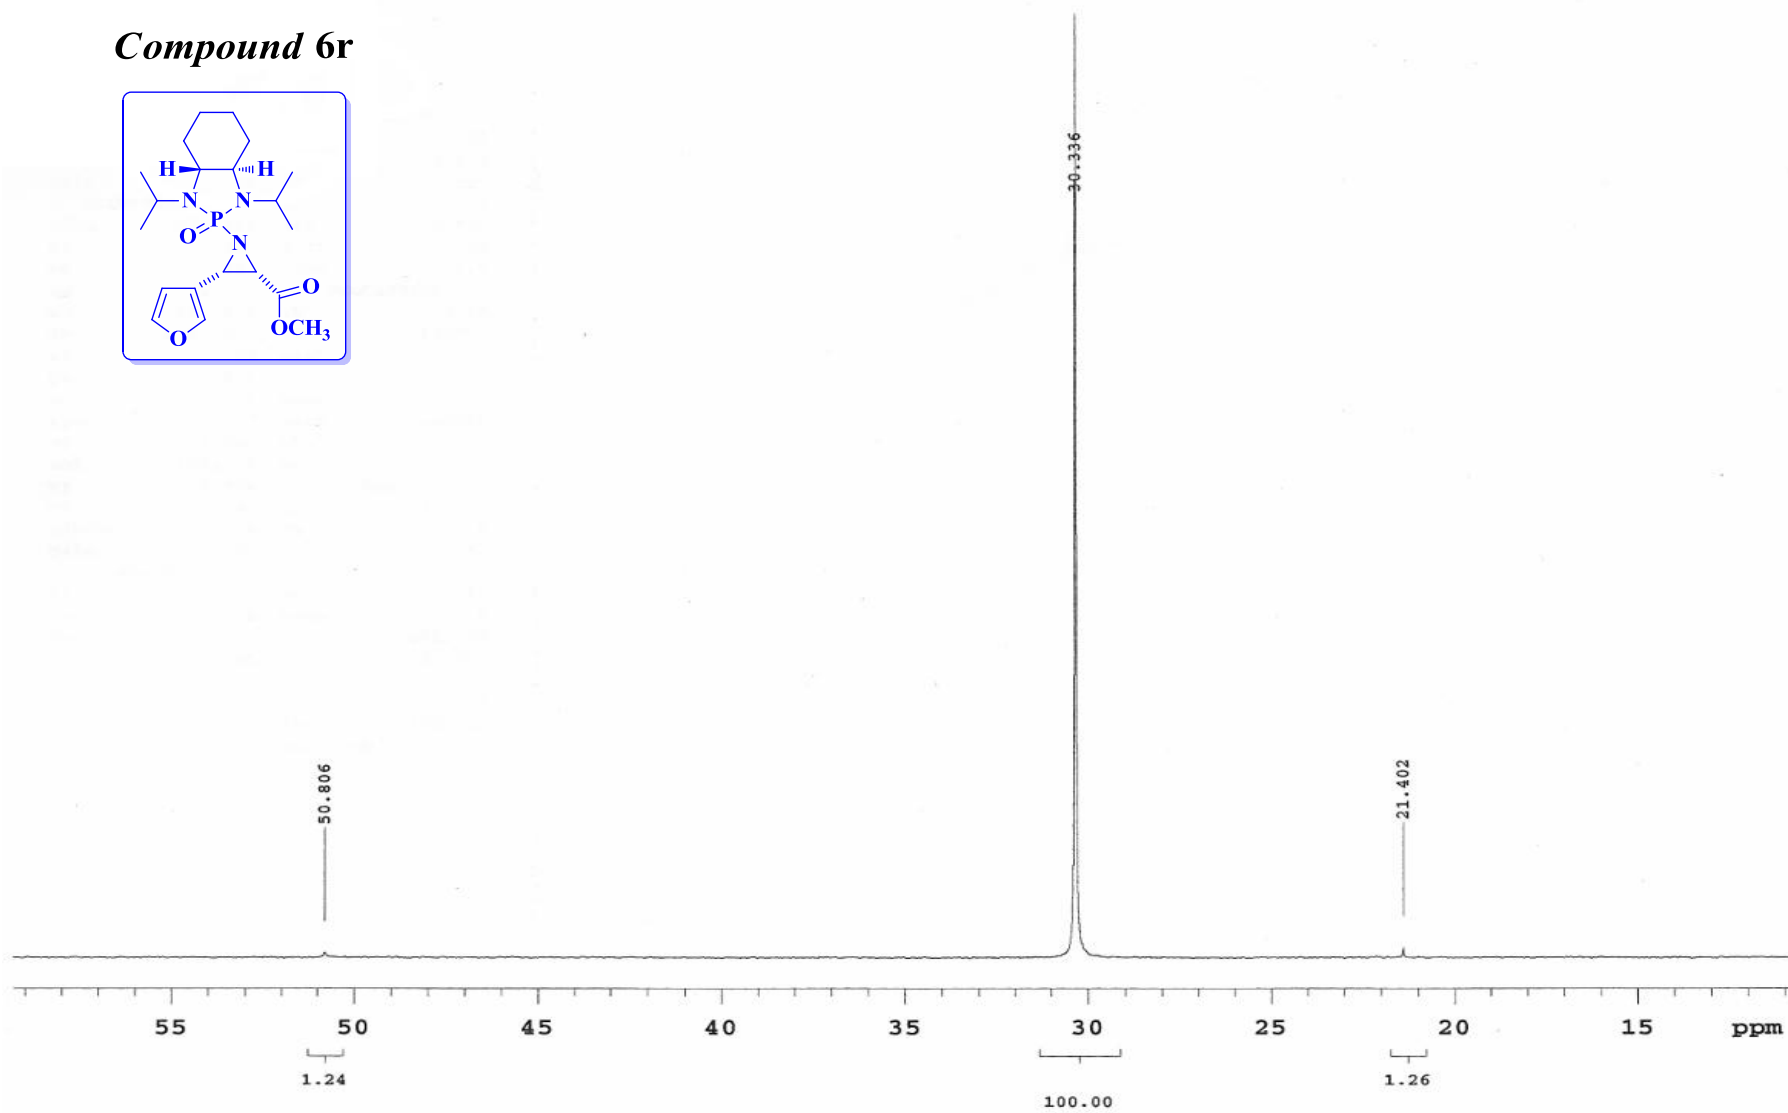



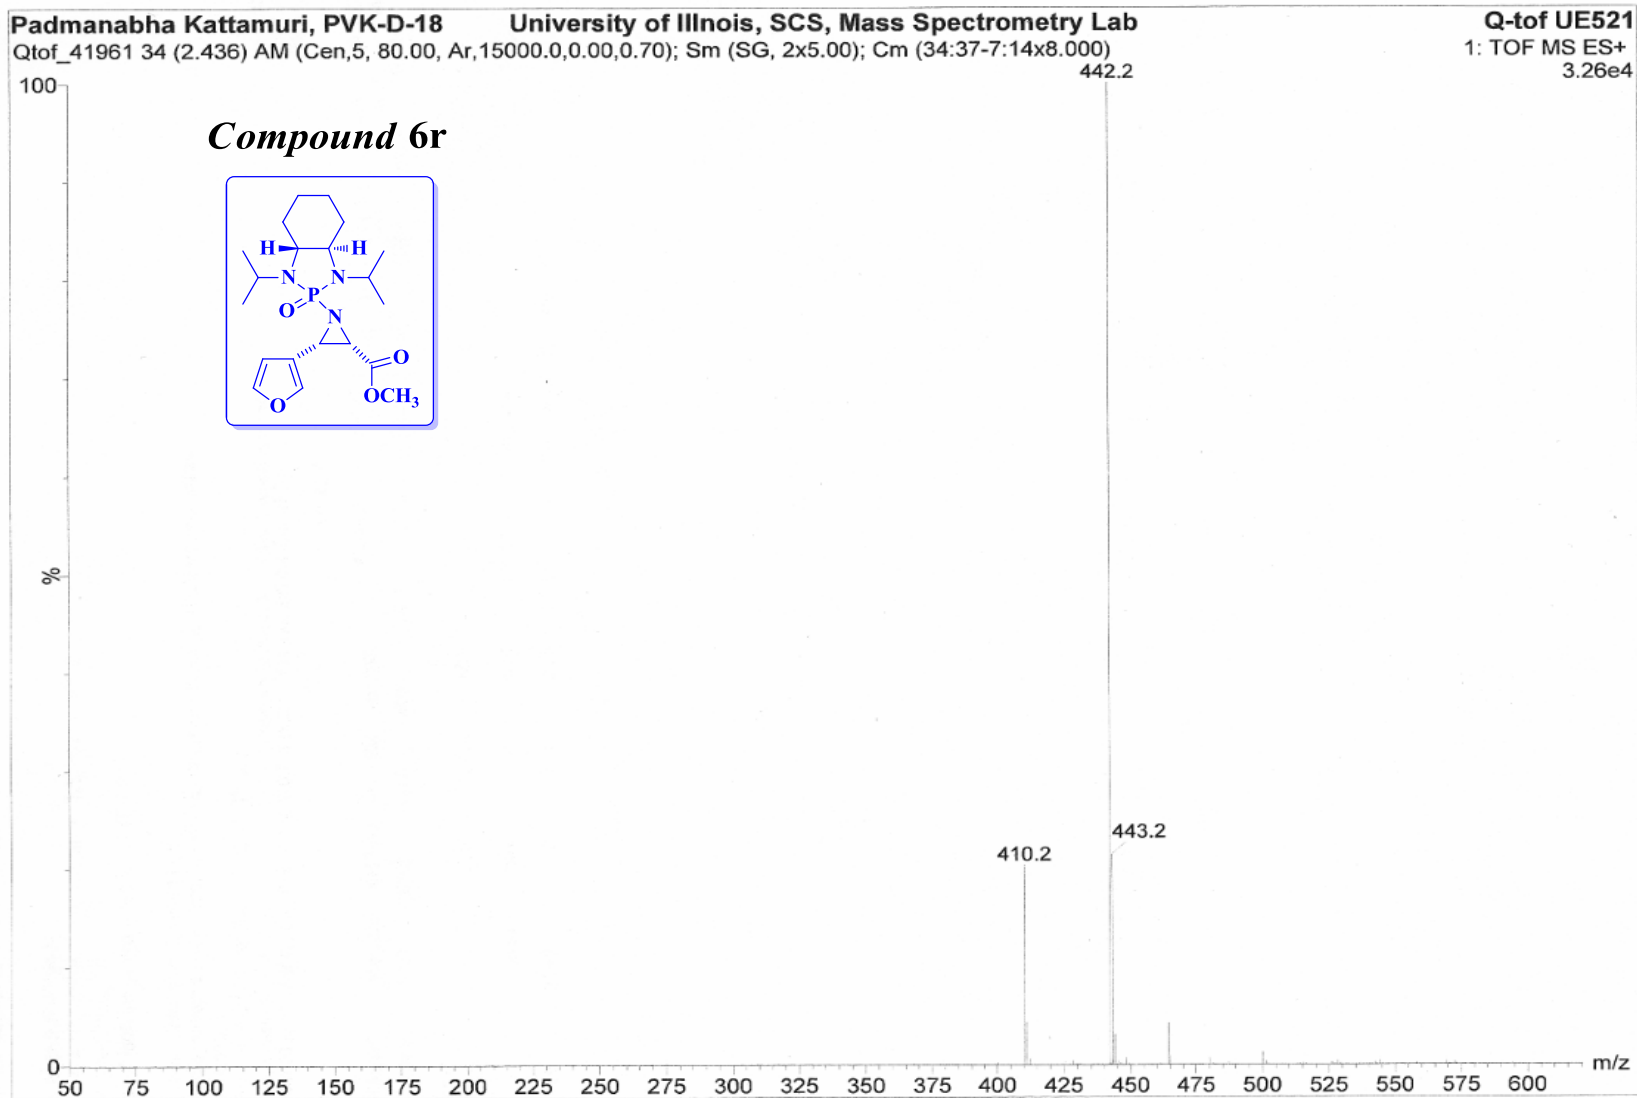

## Elemental Composition Report

### Single Mass Analysis

Tolerance = 10.0 PPM / DBE: min = -1.5, max = 600.0

Element prediction: Off

Number of isotope peaks used for i-FIT = 3

Monoisotopic Mass, Even Electron Ions

90 formula(e) evaluated with 1 results within limits (all results (up to 1000) for each mass)

Elements Used:

C: 0-150 H: 0-250 N: 2-4 O: 2-4 P: 0-1

Padmanabha Kattamuri, PVK-D-18

University of Illinois, SCS, Mass Spectrometry Lab

Qtof\_41961 29 (2.043) AM (Cen,3, 80.00, Ar,15000.0,716.46,0.70); Sm (SG, 2x3.00); Cm (27:30)

Q-tof UE521  
2: TOF MS ES+  
4.96e+002

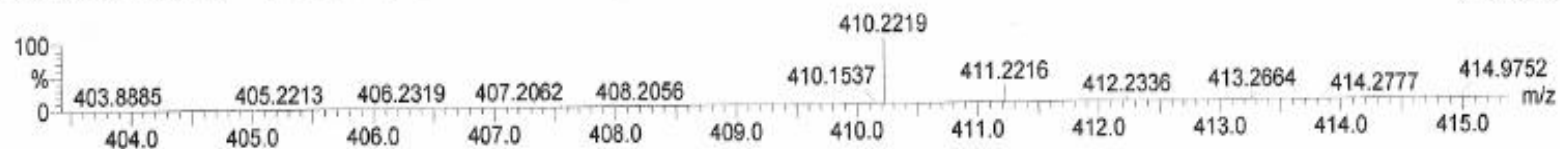

Minimum: -1.5  
Maximum: 5.0 10.0 600.0

| Mass     | Calc. Mass | mDa | PPM | DBE | i-FIT | Formula         |
|----------|------------|-----|-----|-----|-------|-----------------|
| 410.2219 | 410.2209   | 1.0 | 2.4 | 6.5 | 0.7   | C20 H33 N3 O4 P |

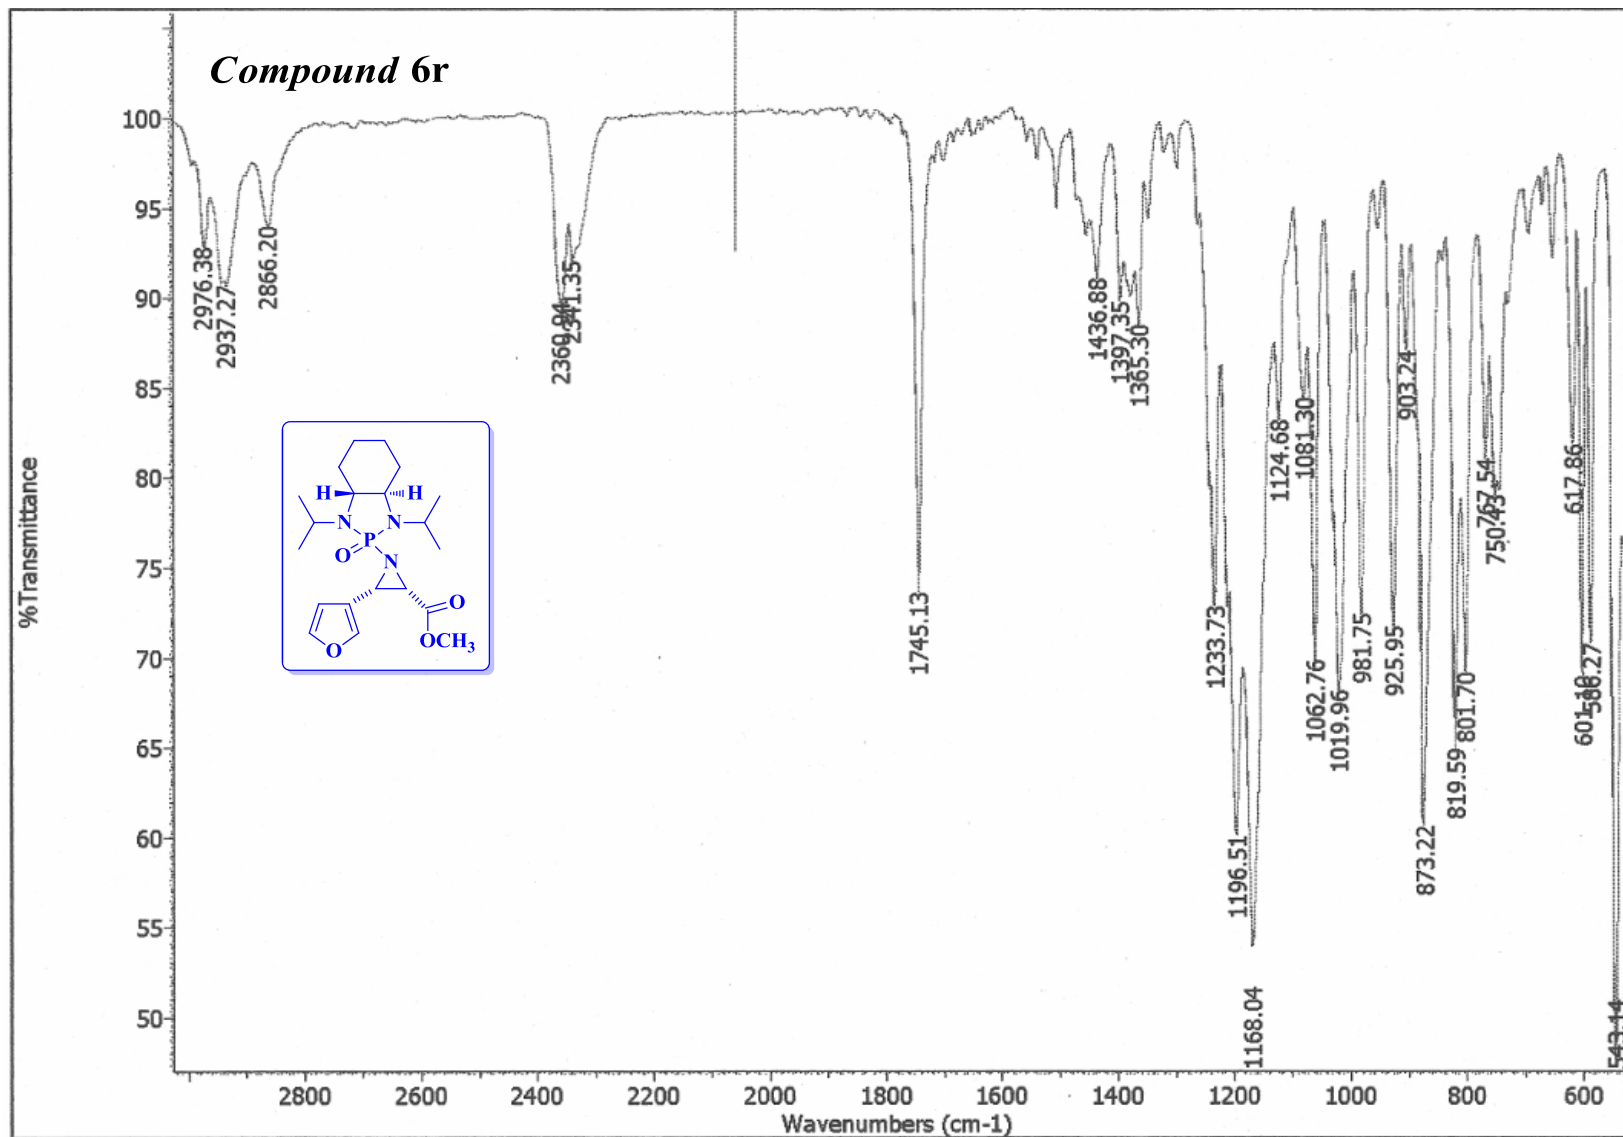

### Compound 6s

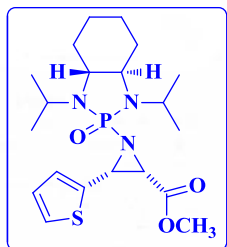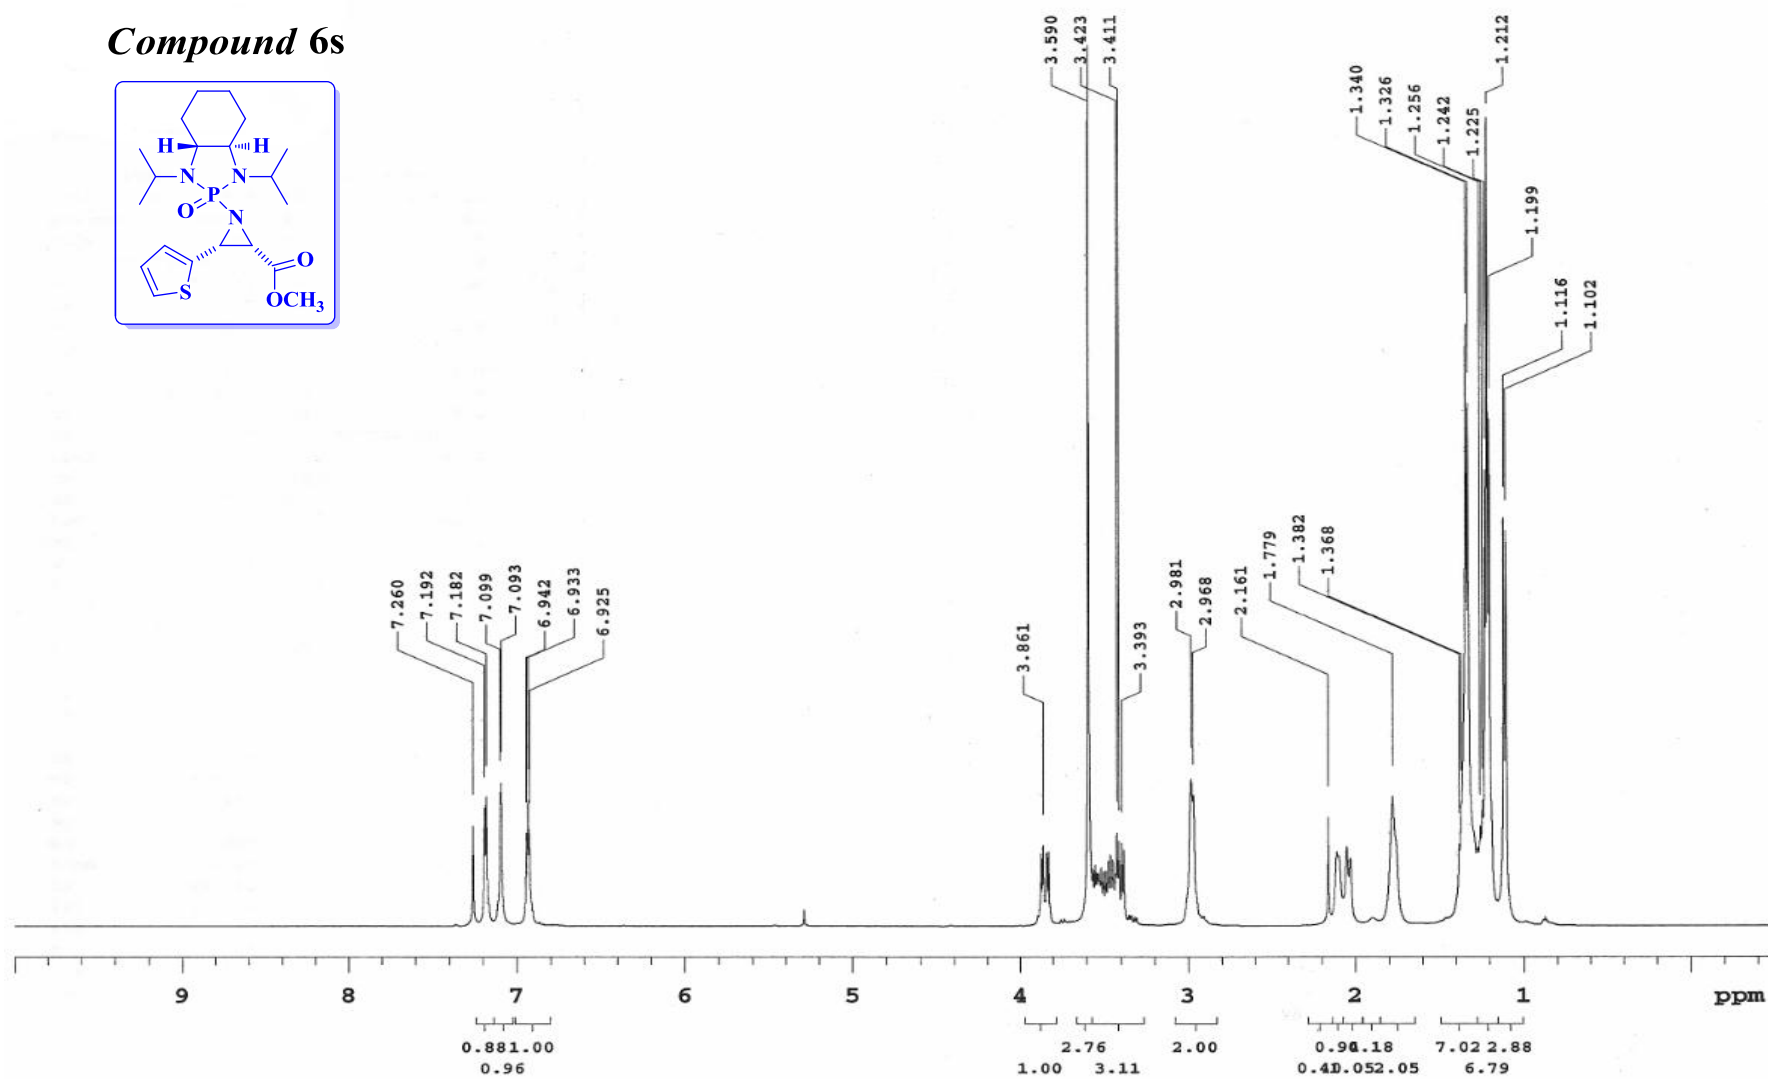

### Compound 6s

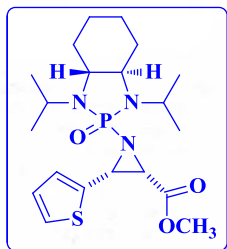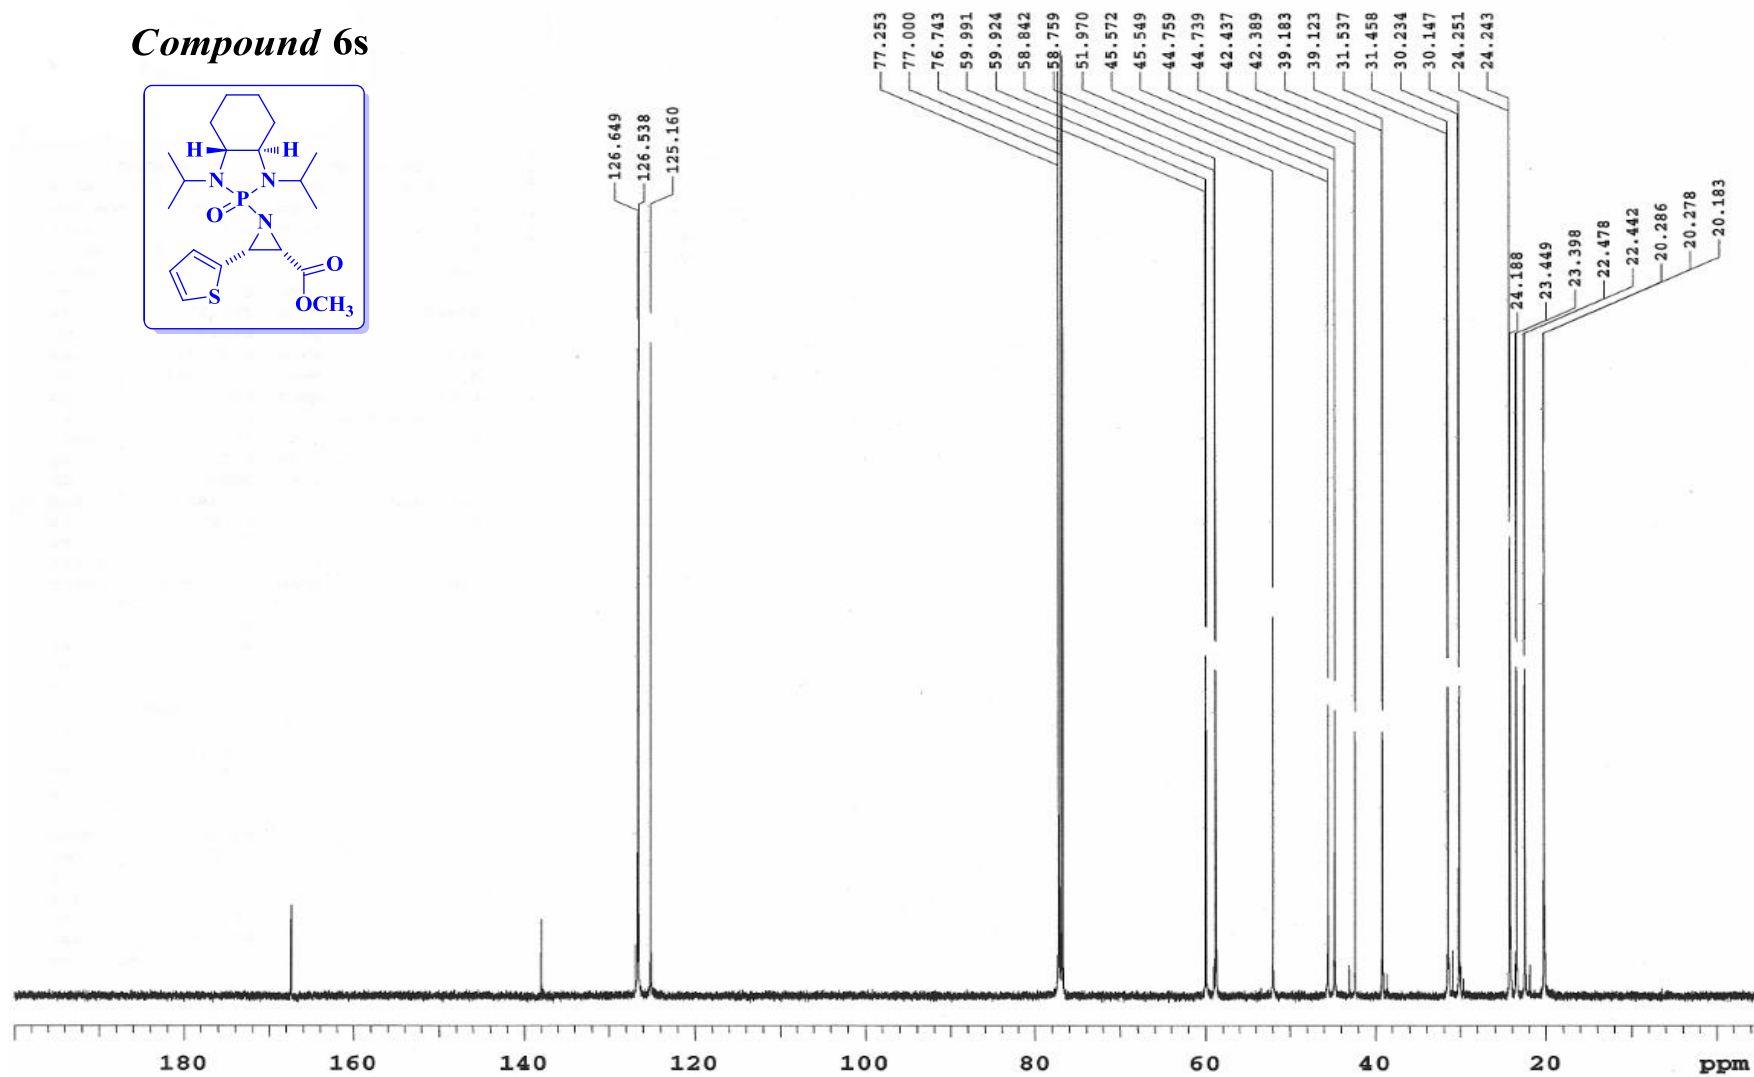

**Compound 6s**

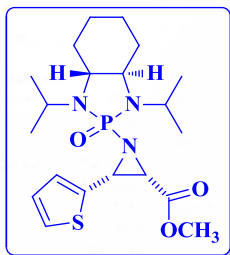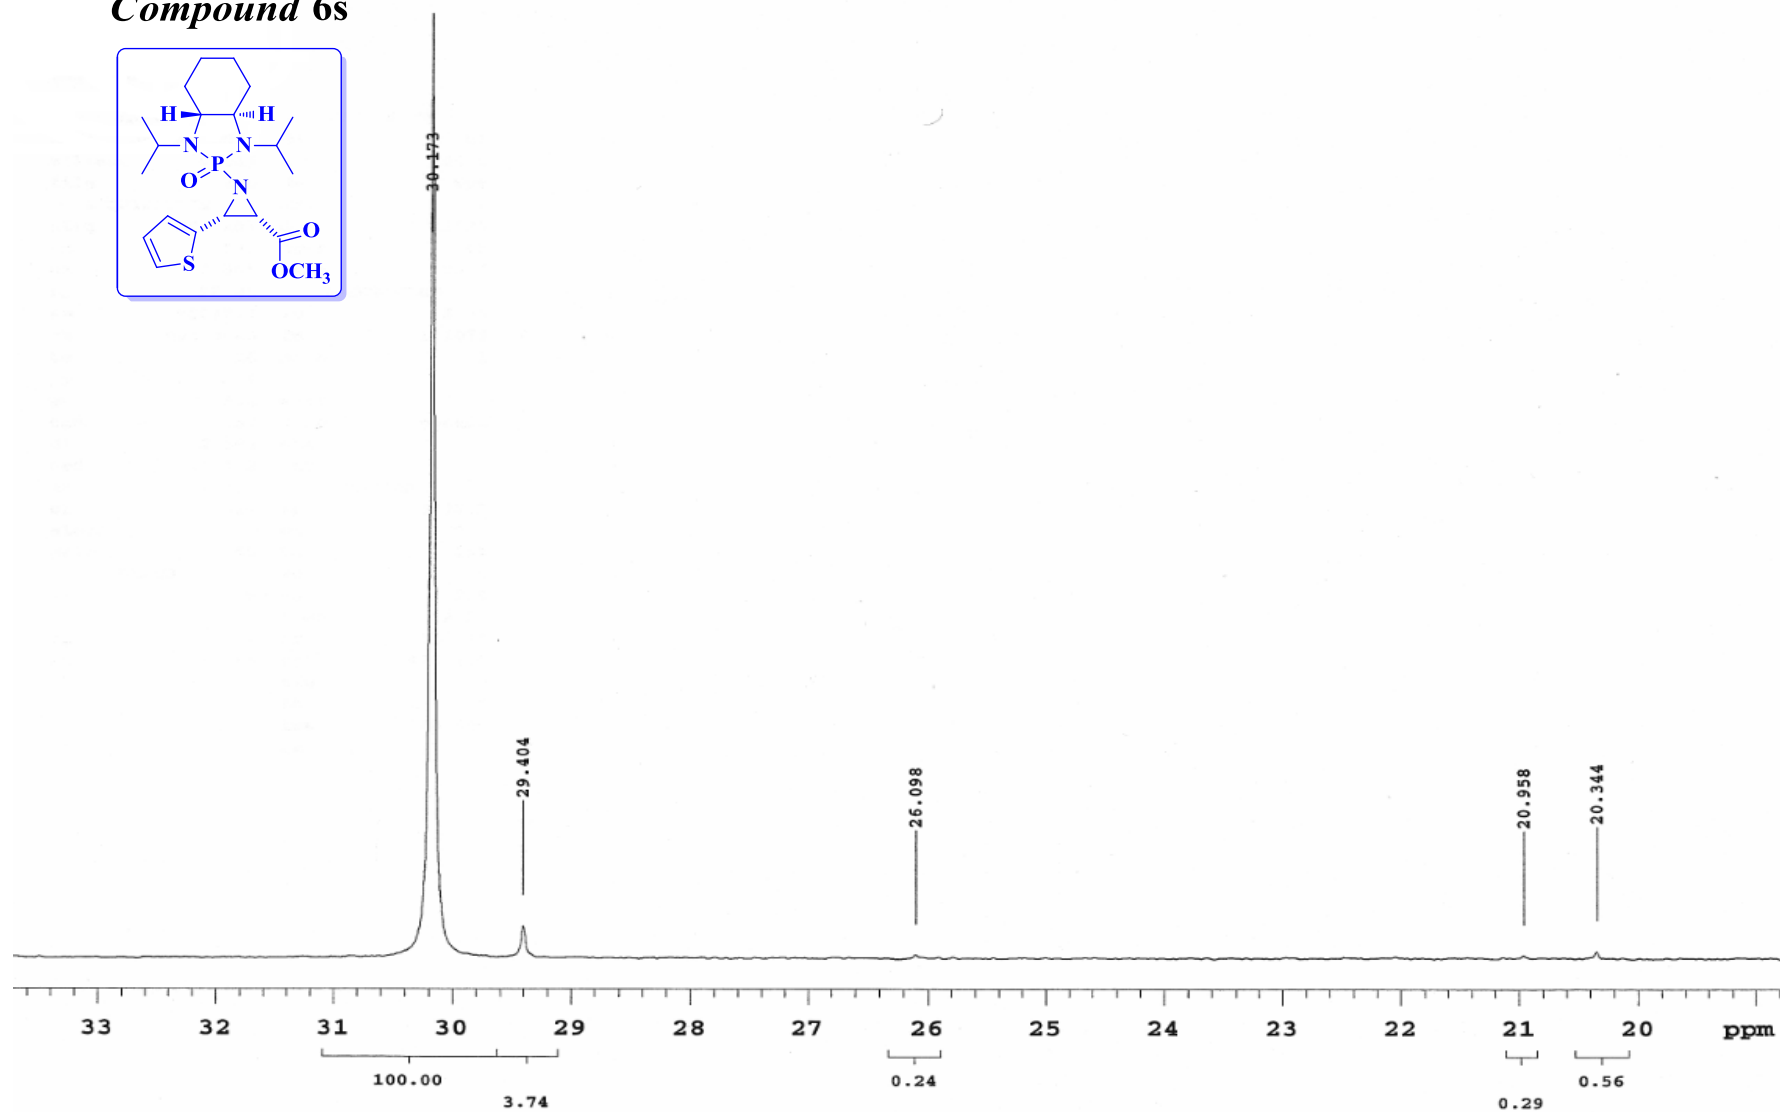

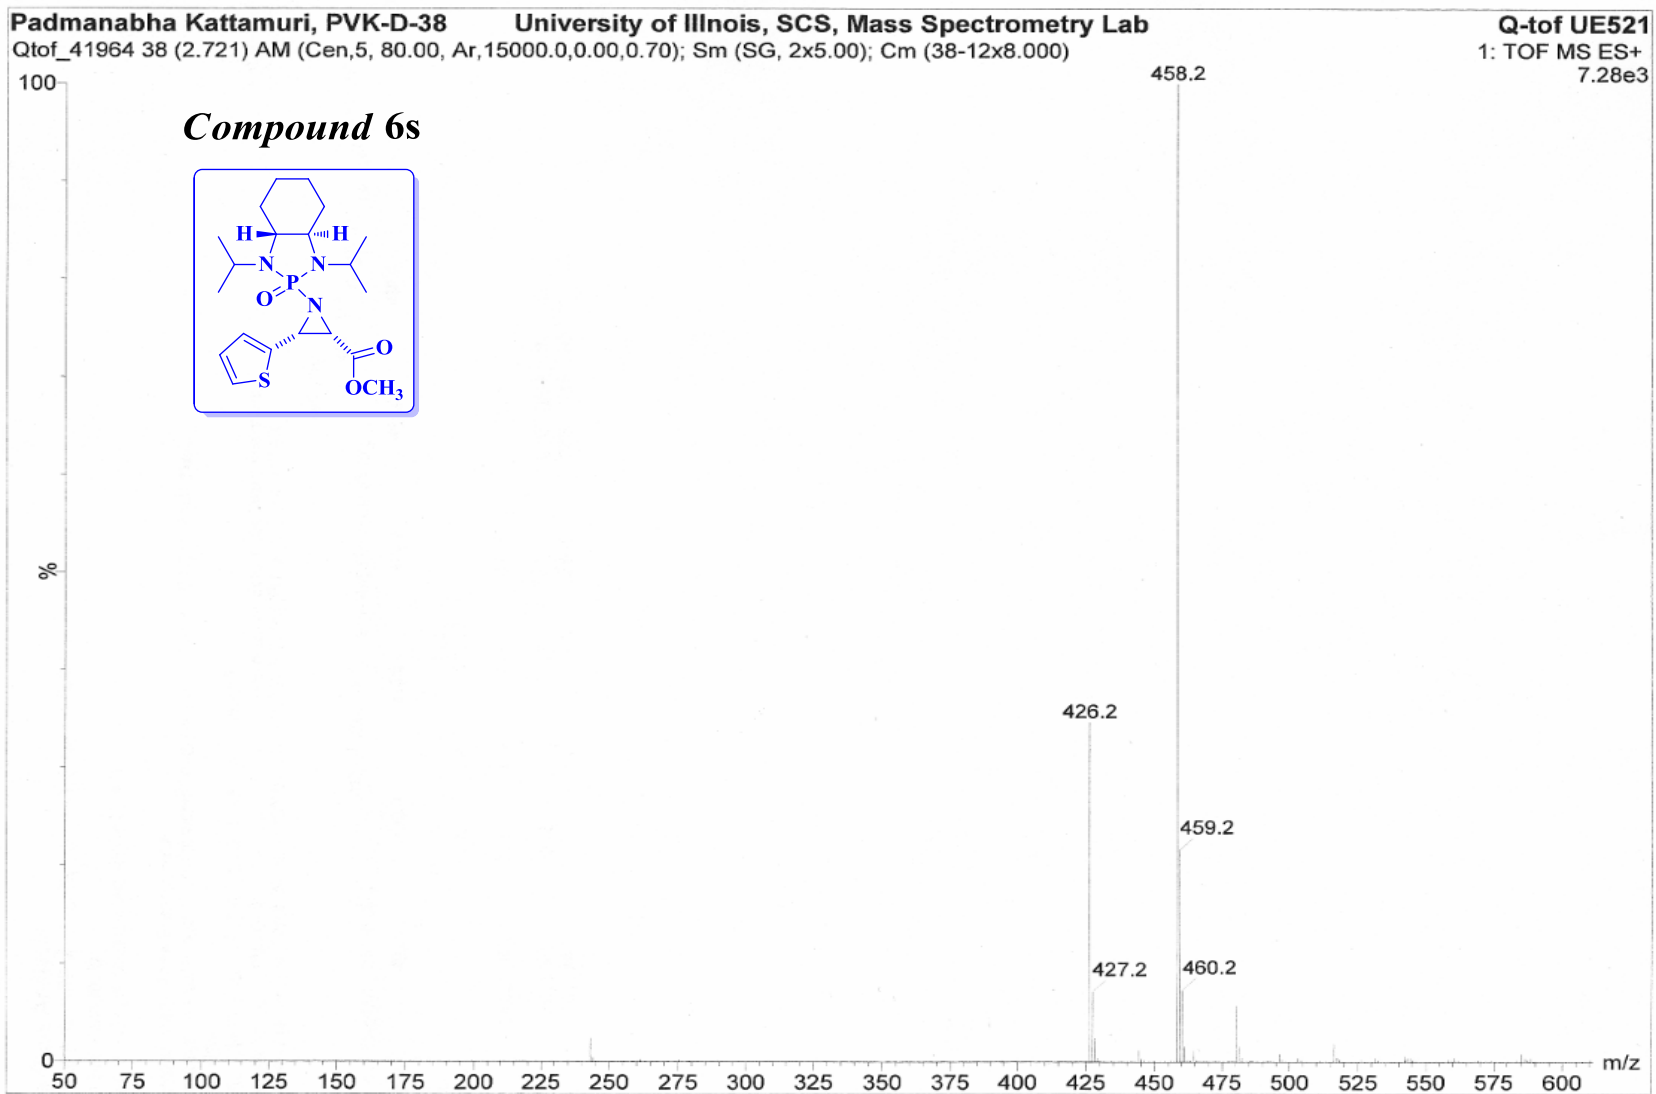

## Elemental Composition Report

Page 1

### Single Mass Analysis

Tolerance = 10.0 PPM / DBE: min = -1.5, max = 600.0

Element prediction: Off

Number of isotope peaks used for i-FIT = 3

Monoisotopic Mass, Even Electron Ions

178 formula(e) evaluated with 2 results within limits (all results (up to 1000) for each mass)

Elements Used:

C: 0-150 H: 0-250 N: 2-4 O: 2-4 P: 0-1 S: 0-1

Padmanabha Kattamuri, PVK-D-38

University of Illinois, SCS, Mass Spectrometry Lab

Qtof\_41964 47 (3.364) AM (Cen,3, 80.00, Ar,15000.0,716.46,0.70,LS 3); Sm (SG, 2x3.00); Cm (47:49)

Q-tof UE521  
1: TOF MS ES+  
2.45e+003

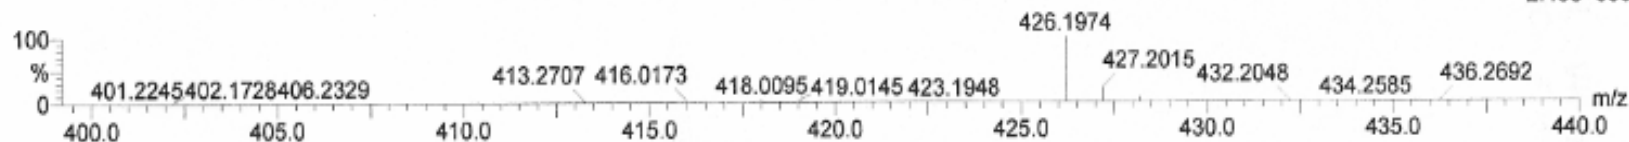

Minimum: -1.5  
Maximum: 5.0 10.0 600.0

| Mass     | Calc. Mass | mDa  | PPM  | DBE  | i-FIT | Formula           |
|----------|------------|------|------|------|-------|-------------------|
| 426.1974 | 426.1980   | -0.6 | -1.4 | 6.5  | 6.2   | C20 H33 N3 O3 P S |
|          | 426.1947   | 2.7  | 6.3  | 11.5 | 26.8  | C23 H29 N3 O3 P   |



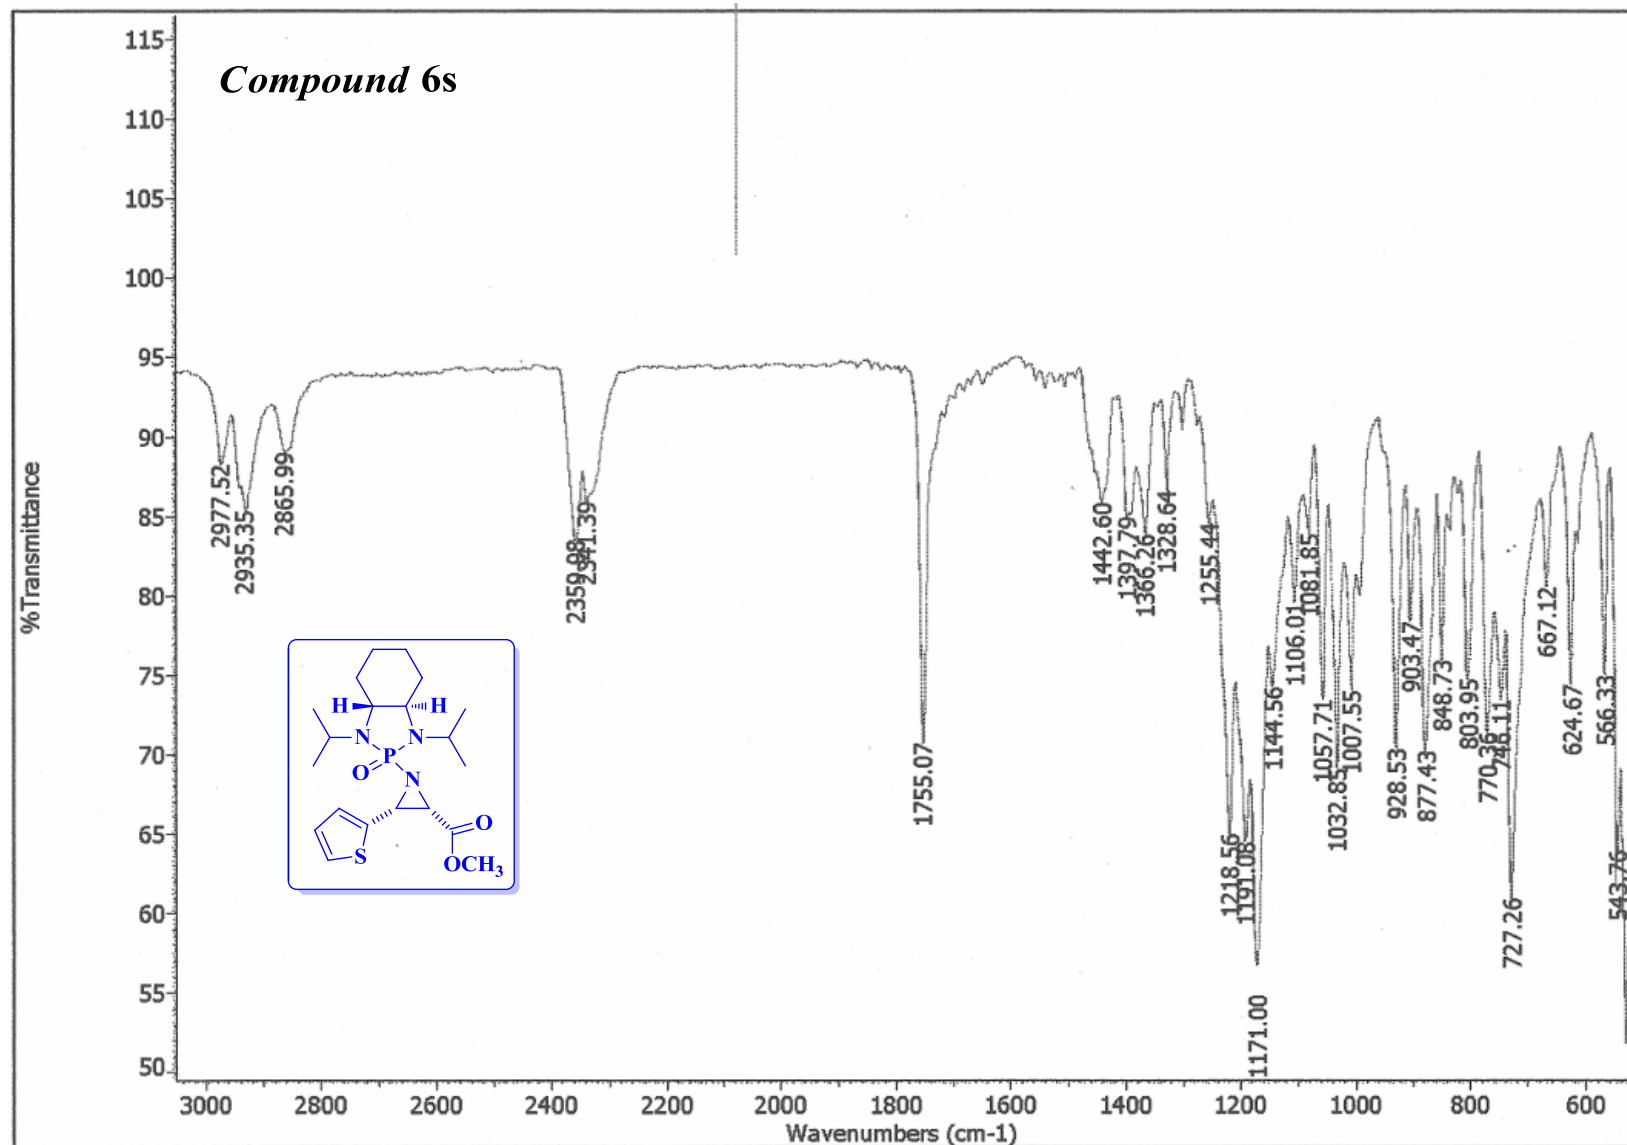

### Compound 6t

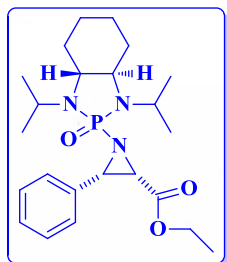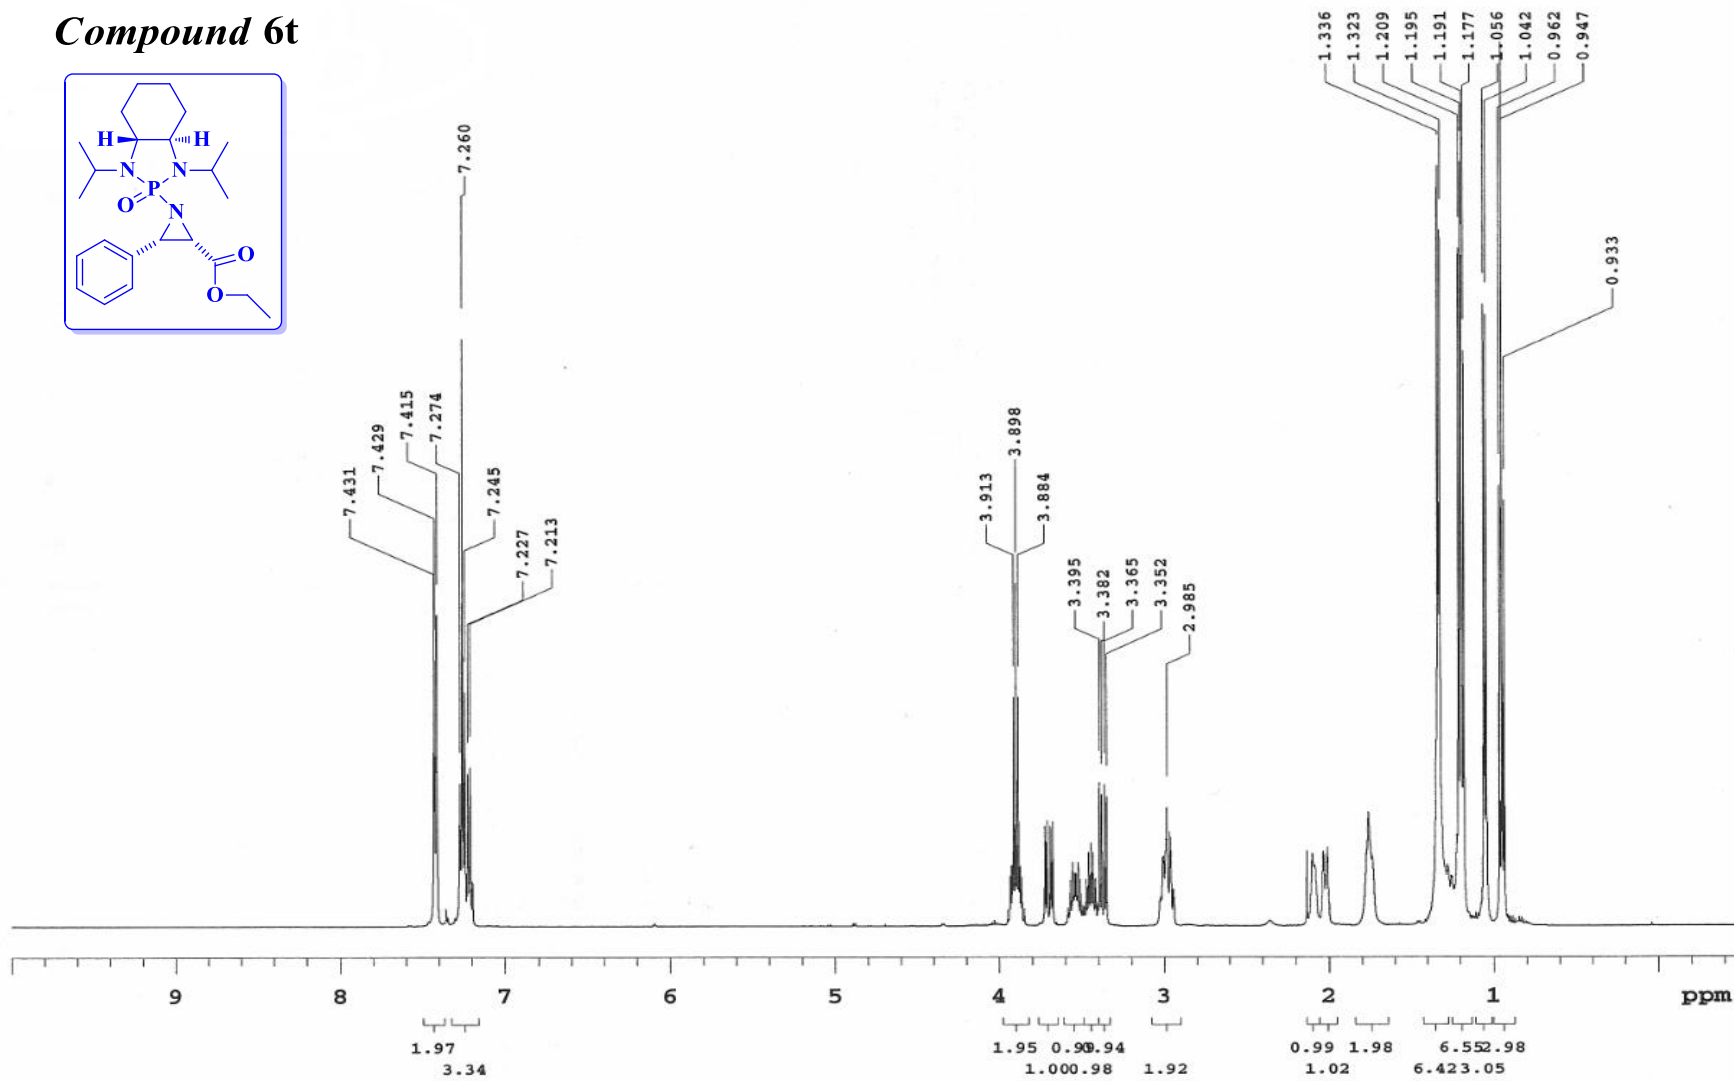

### Compound 6t

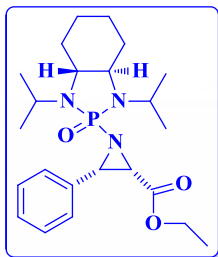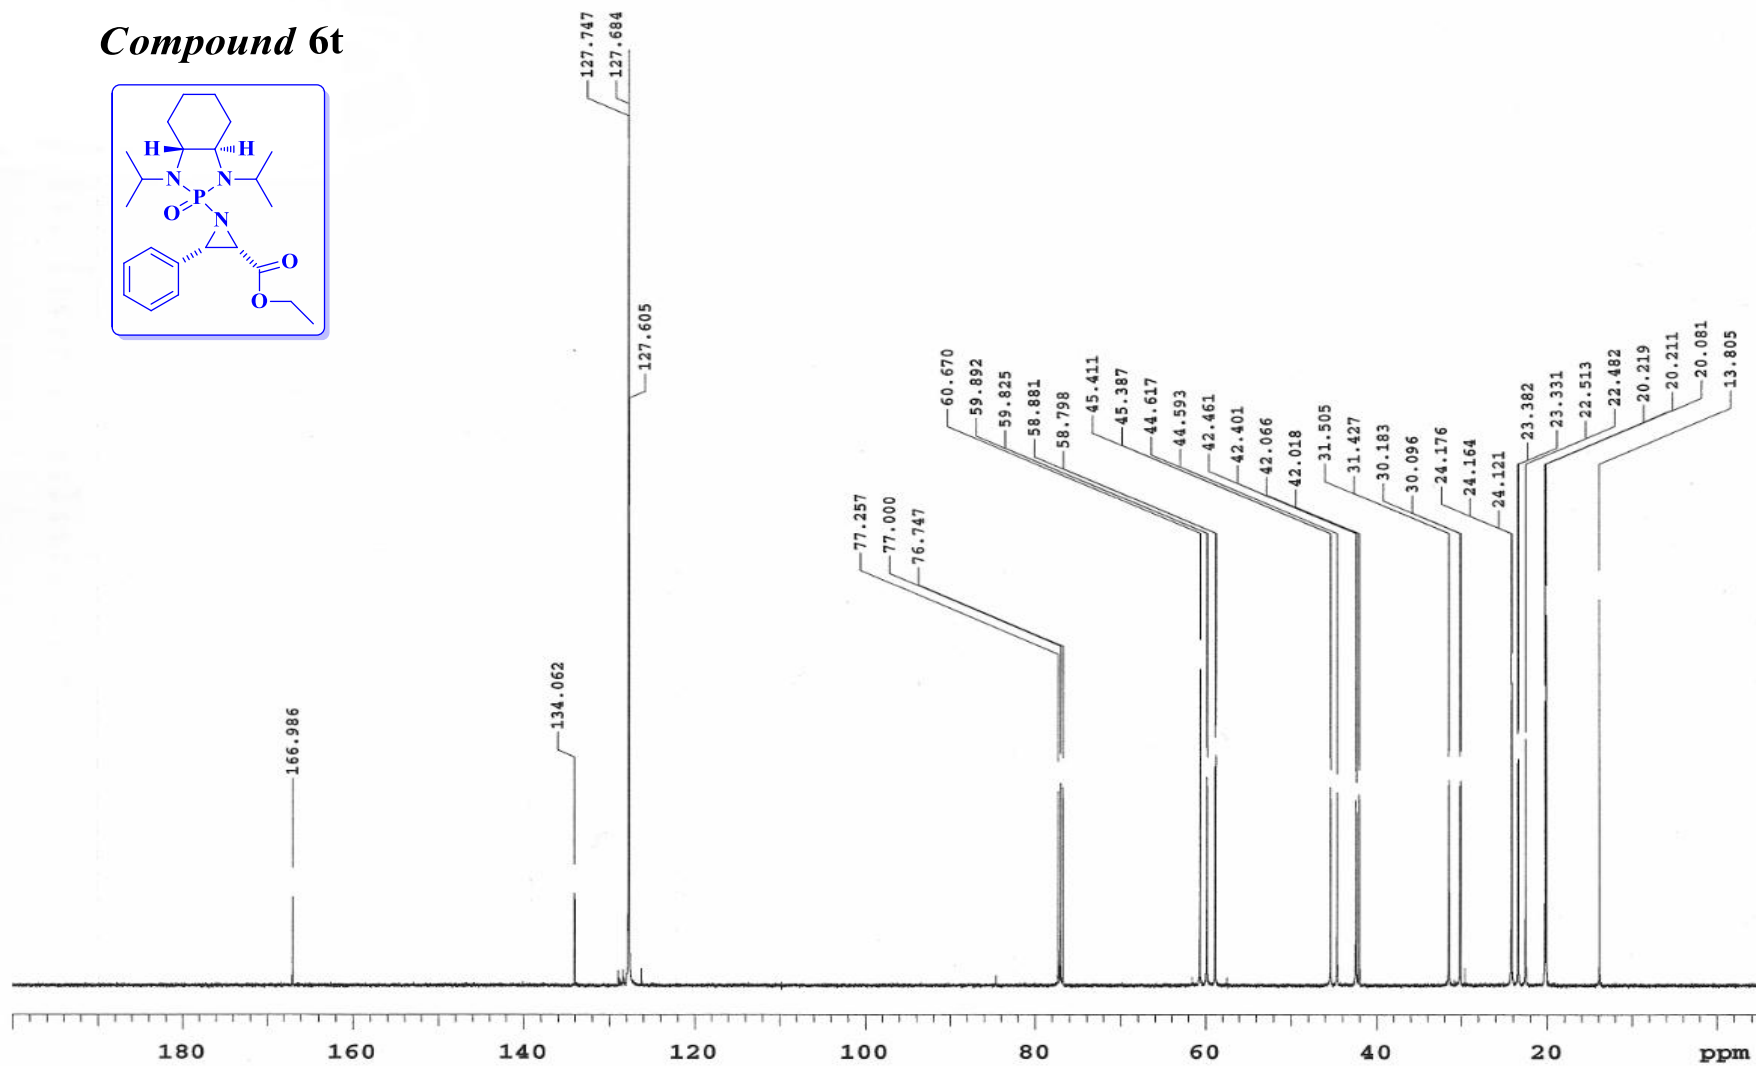

### Compound 6t

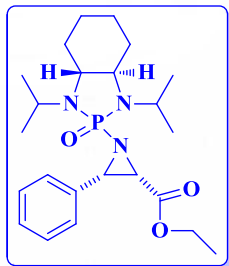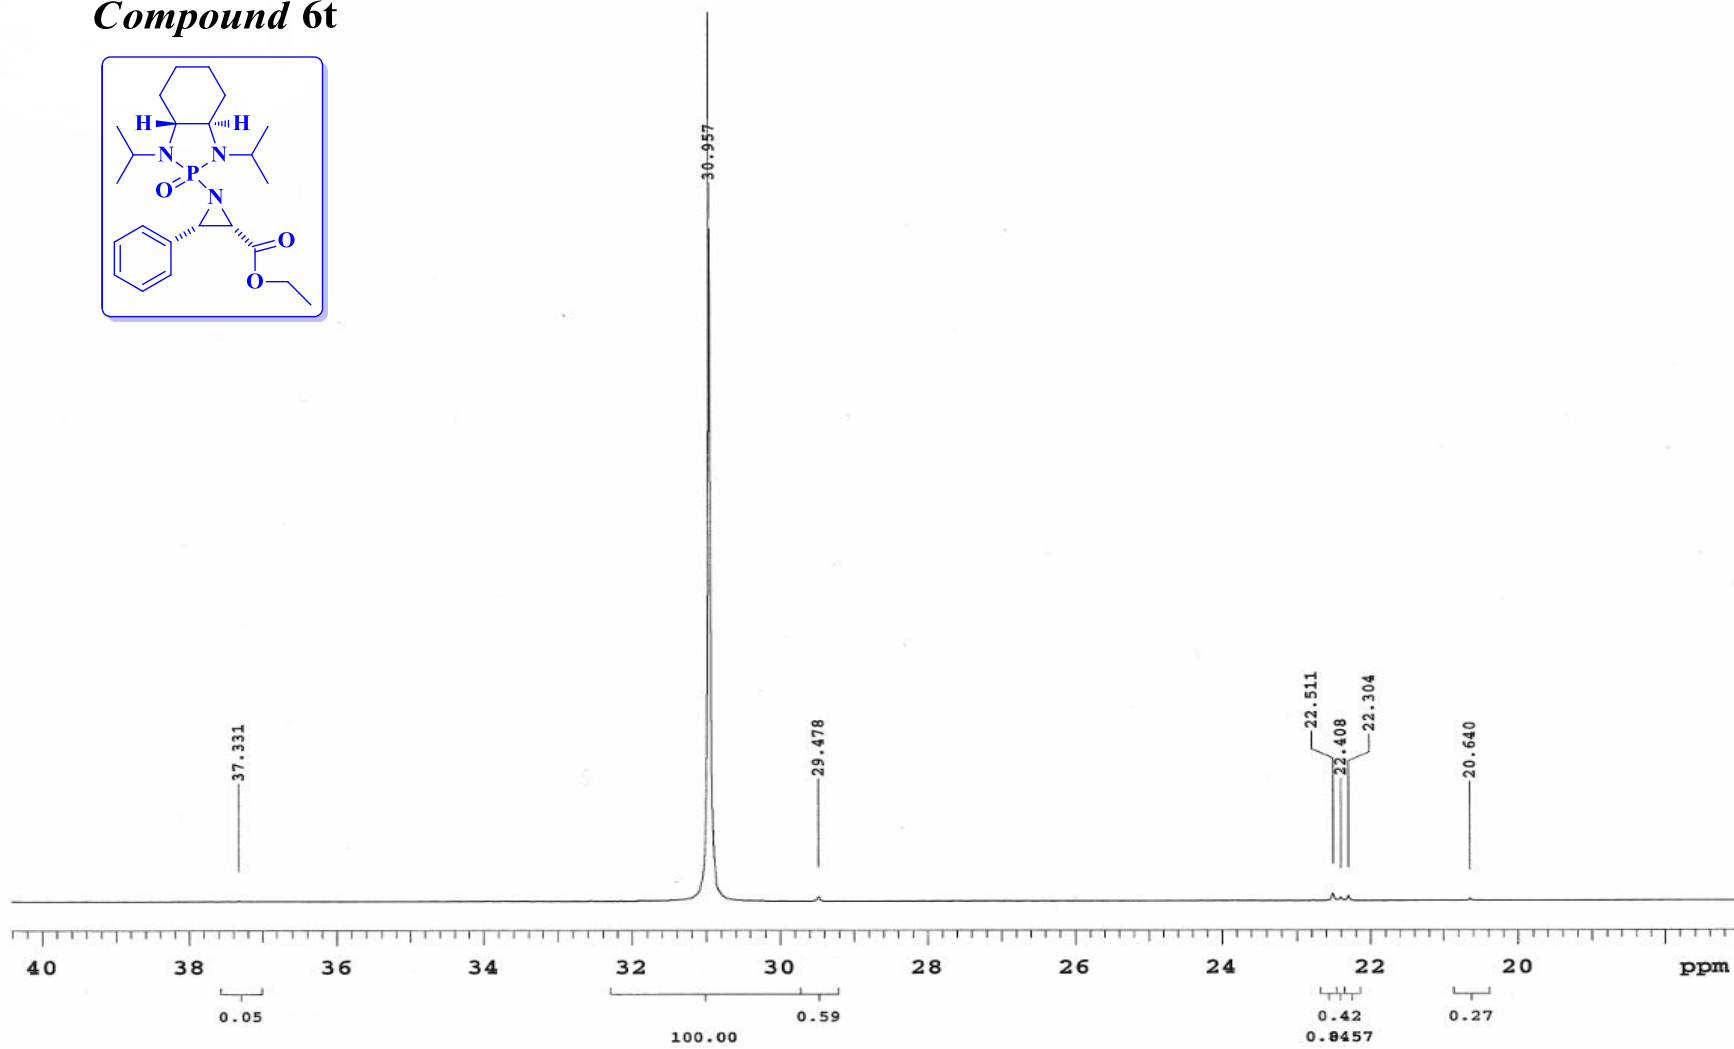

Padmanabha Kattamuri, PVK-D-93(B) University of Illinois, SCS, Mass Spectrometry Lab  
Qtof\_41976 36 (2.579) AM (Cen,5, 80.00, Ar,15000.0,0.00,0.70); Sm (SG, 2x5.00); Cm (36-9x8.000)

Q-tof UE521  
1: TOF MS ES+  
1.25e4

**Compound 6t**

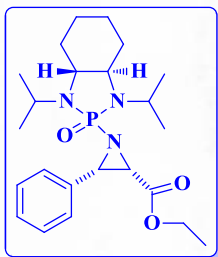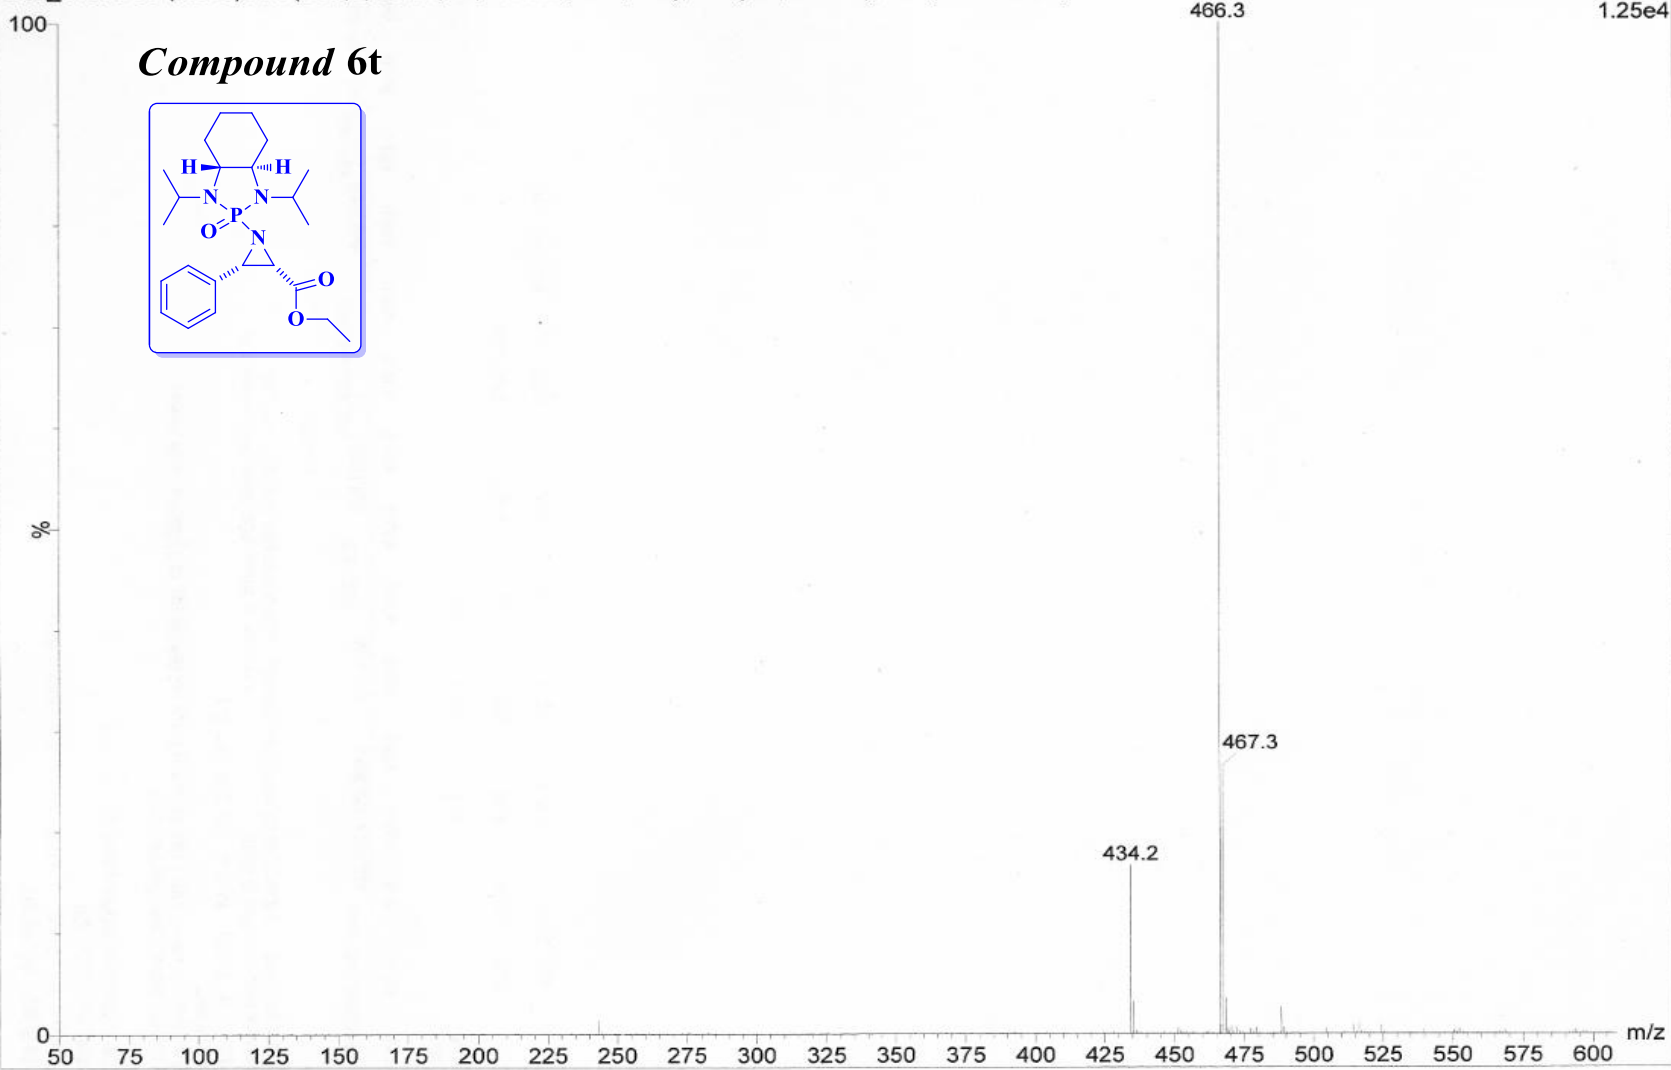

## Elemental Composition Report

Page 1

### Single Mass Analysis

Tolerance = 10.0 PPM / DBE: min = -1.5, max = 600.0

Element prediction: Off

Number of isotope peaks used for i-FIT = 3

Monoisotopic Mass, Even Electron Ions

91 formula(e) evaluated with 1 results within limits (all results (up to 1000) for each mass)

Elements Used:

C: 0-150 H: 0-250 N: 2-4 O: 2-4 P: 0-1

Padmanabha Kattamuri, PVK-D-93(B)

University of Illinois, SCS, Mass Spectrometry Lab

Qtof\_41976 51 (3.650) AM (Cen.3, 80.00, Ar,15000.0,716.46,0.70,LS 3); Sm (SG, 2x3.00); Cm (51:52)

Q-tof UE521  
1: TOF MS ES+  
1.89e+003

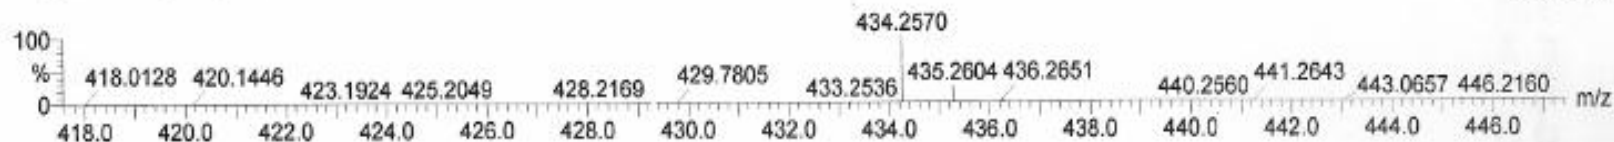

Minimum:

Maximum:

-1.5

5.0

10.0

600.0

| Mass     | Calc. Mass | mDa  | PPM  | DBE | i-FIT | Formula         |
|----------|------------|------|------|-----|-------|-----------------|
| 434.2570 | 434.2573   | -0.3 | -0.7 | 7.5 | 3.5   | C23 H37 N3 O3 P |

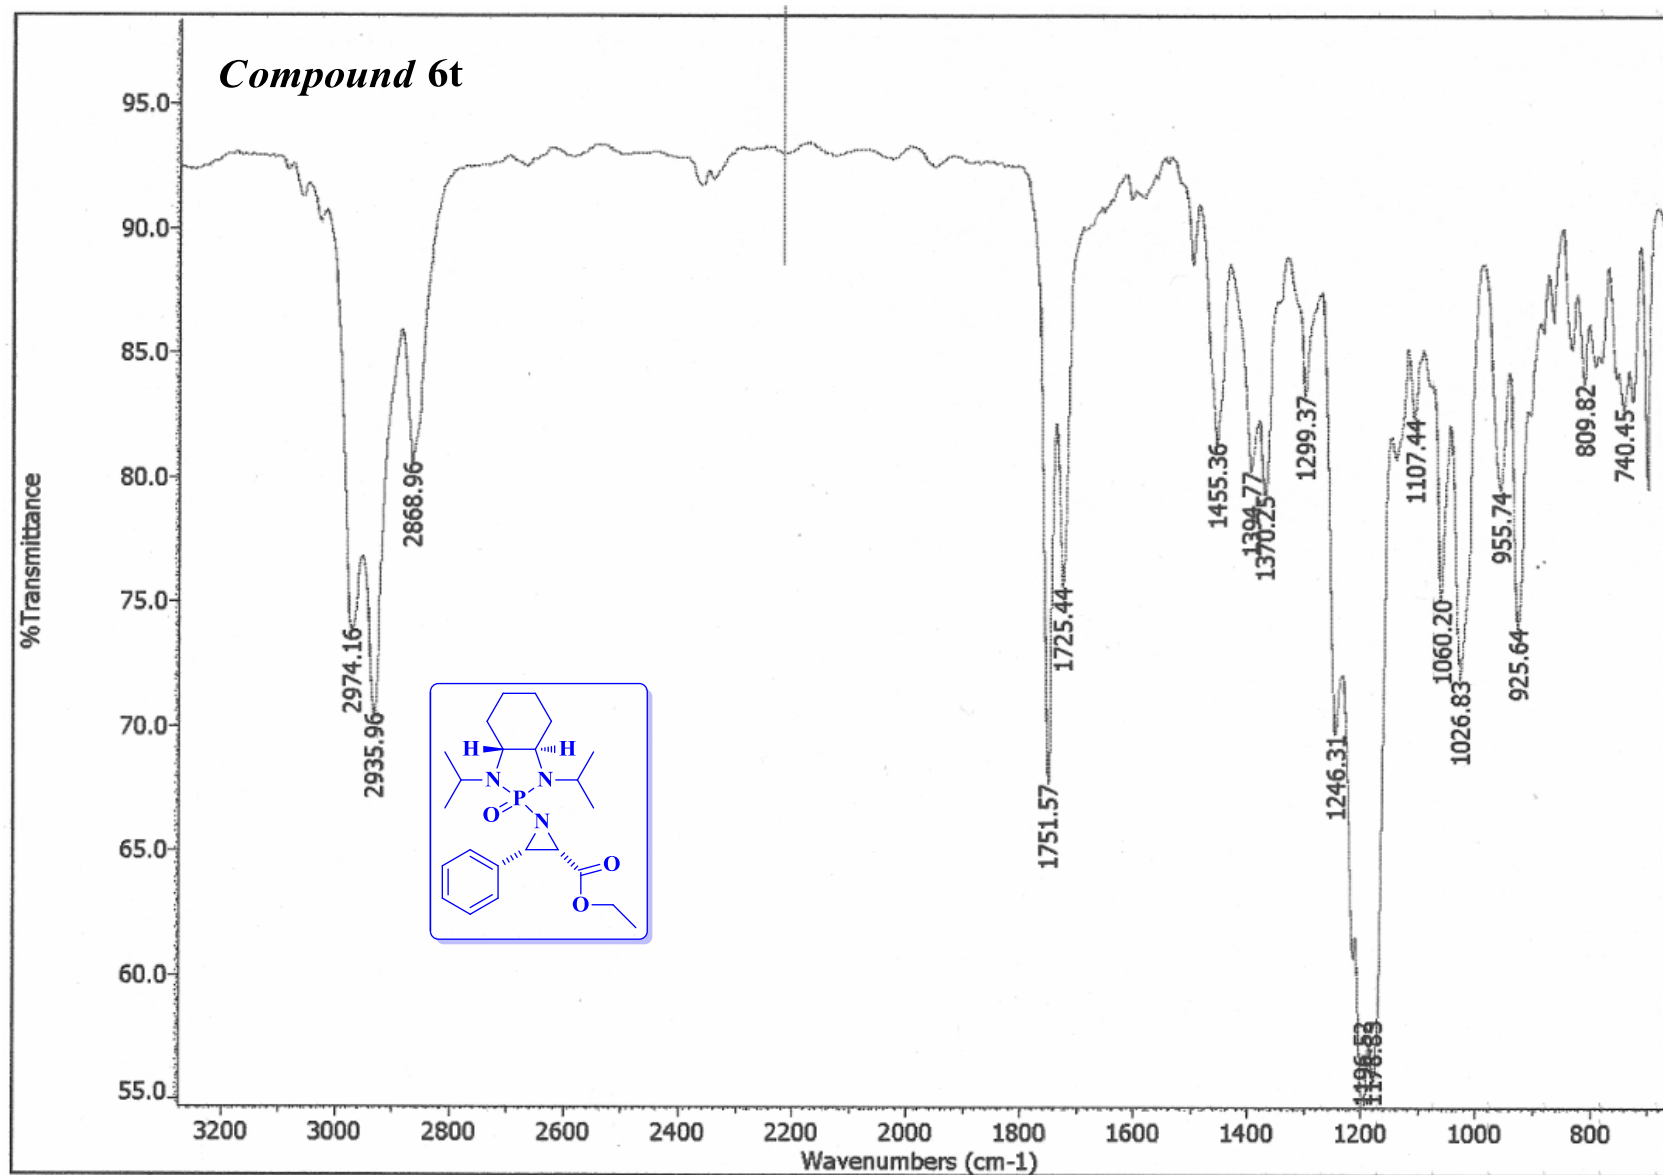

### Compound 6u

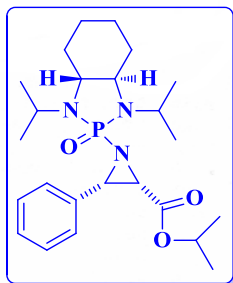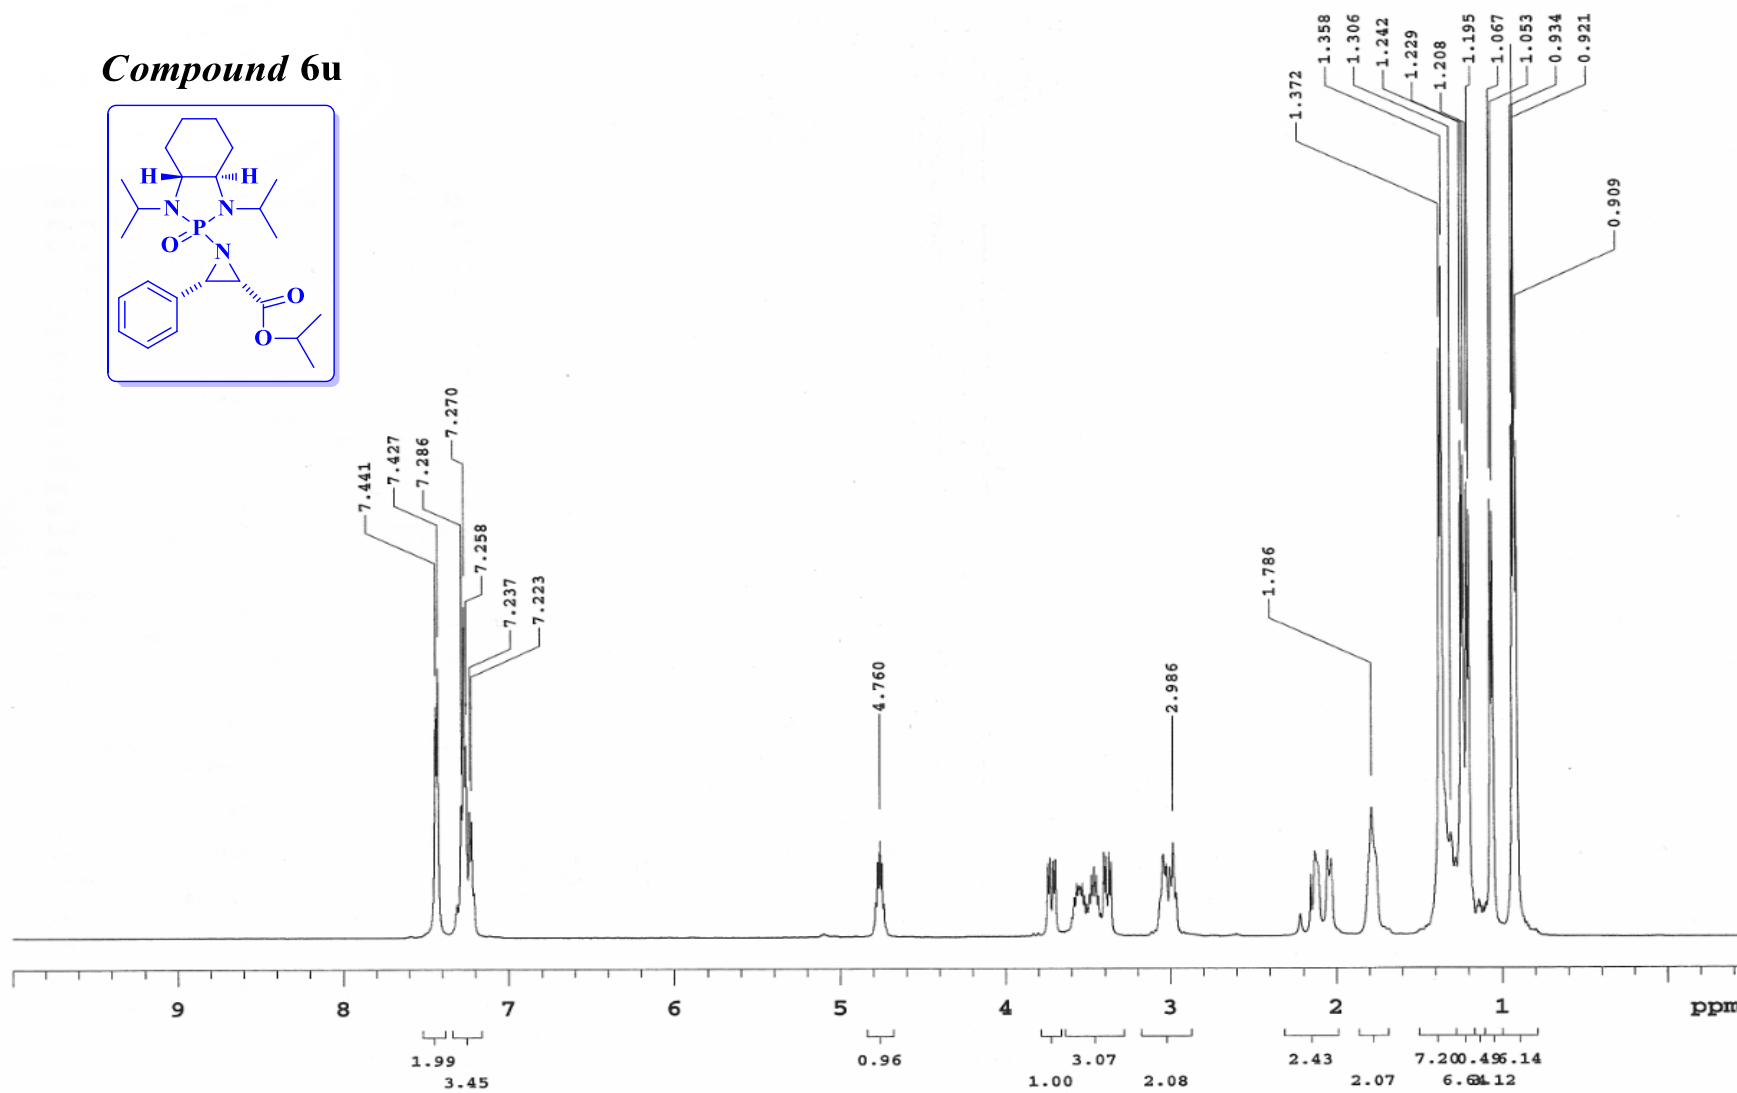



### Compound 6u

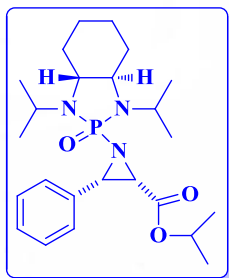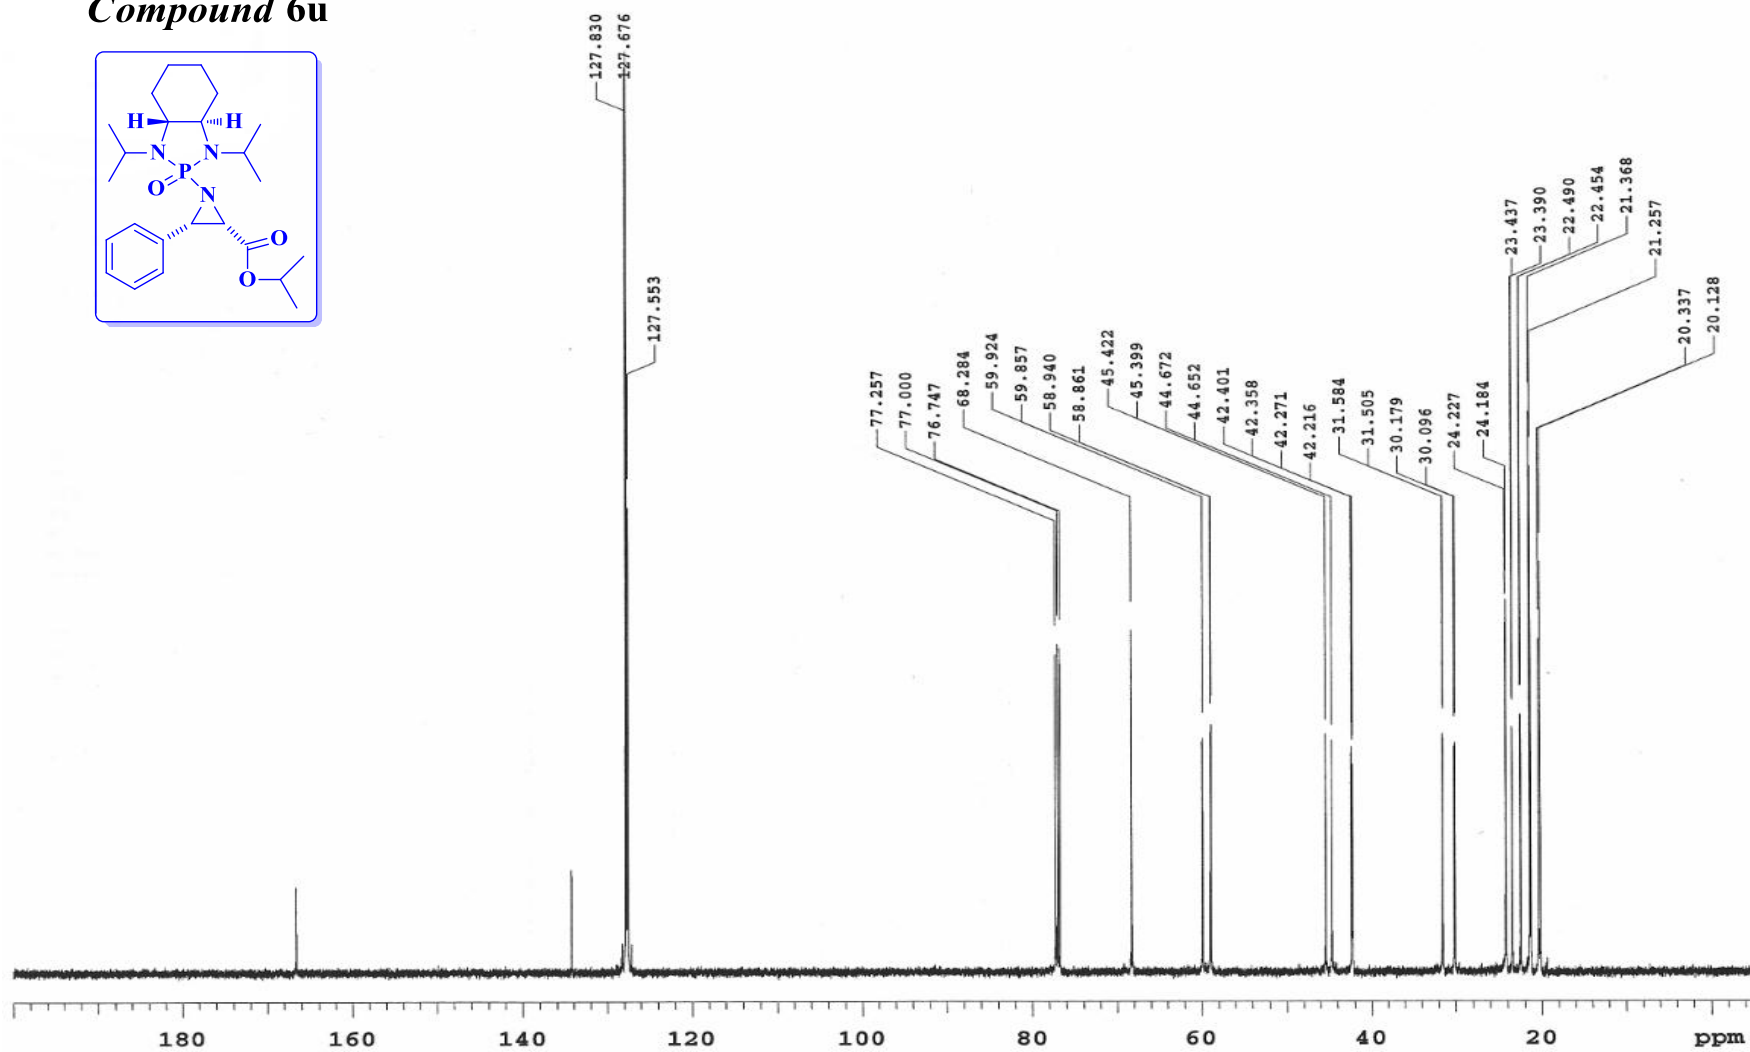

**Compound 6u**

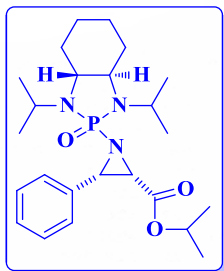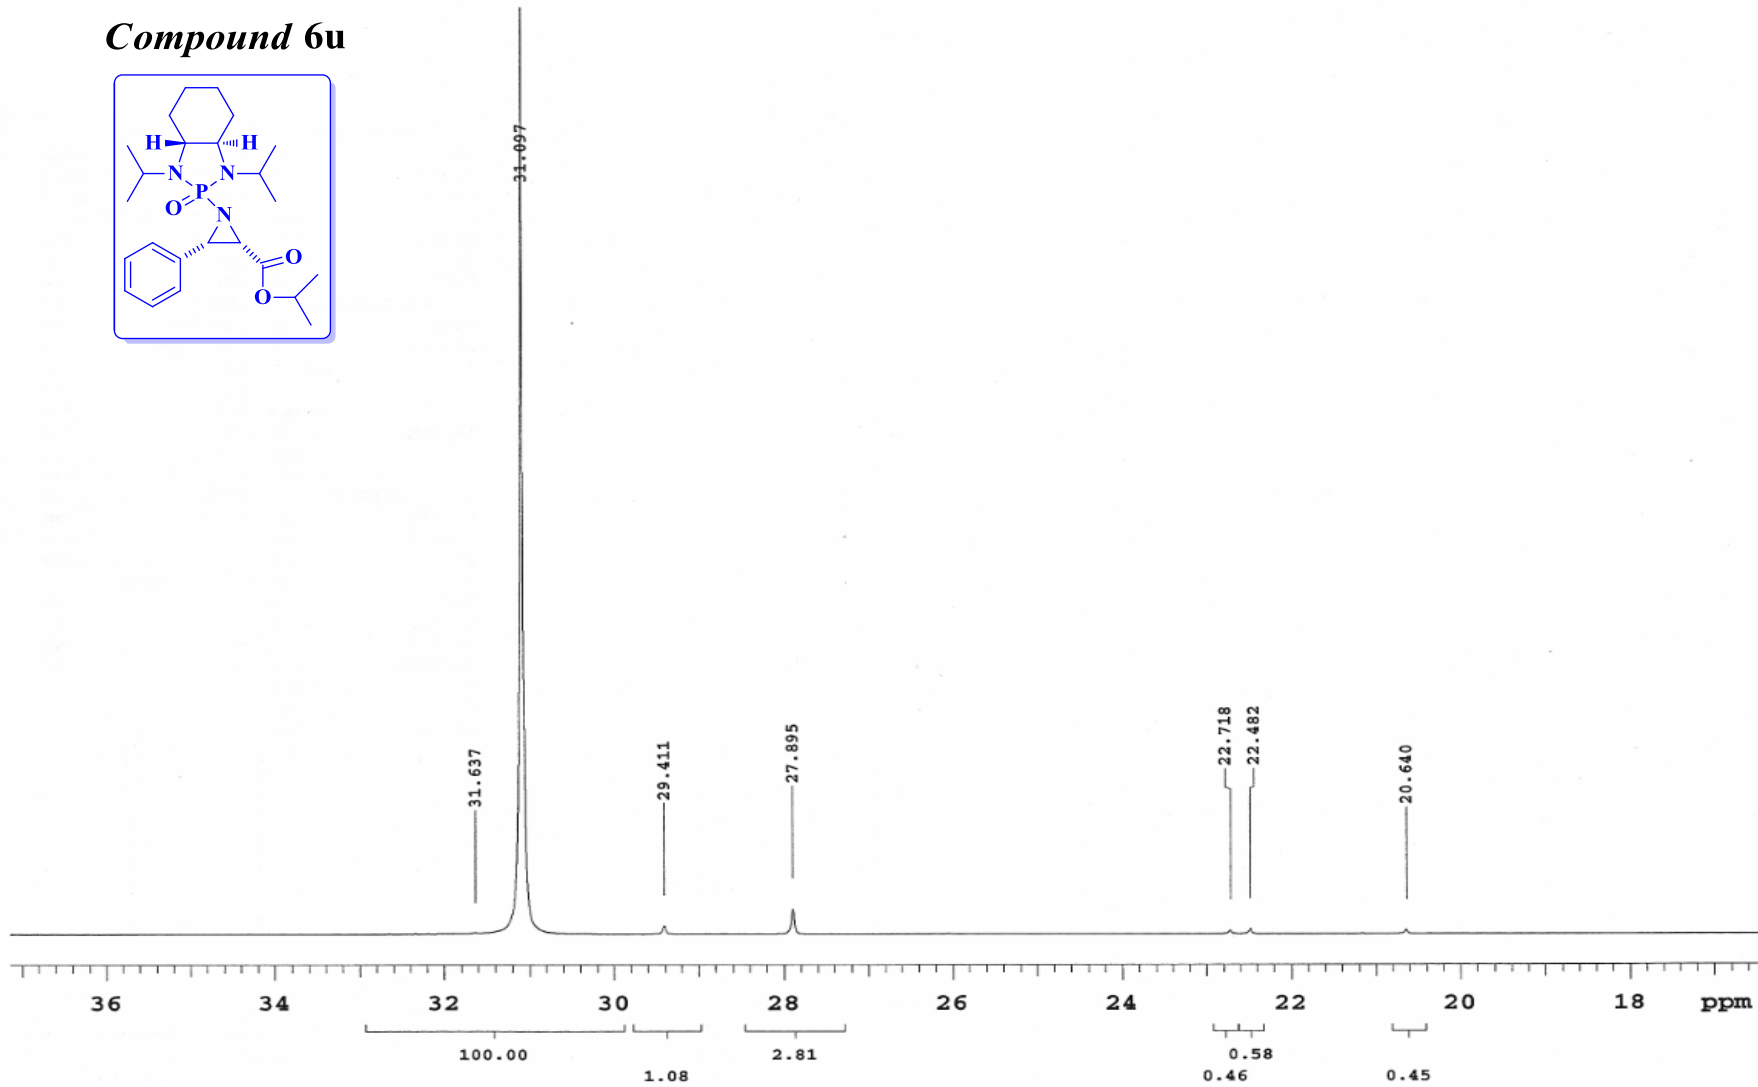

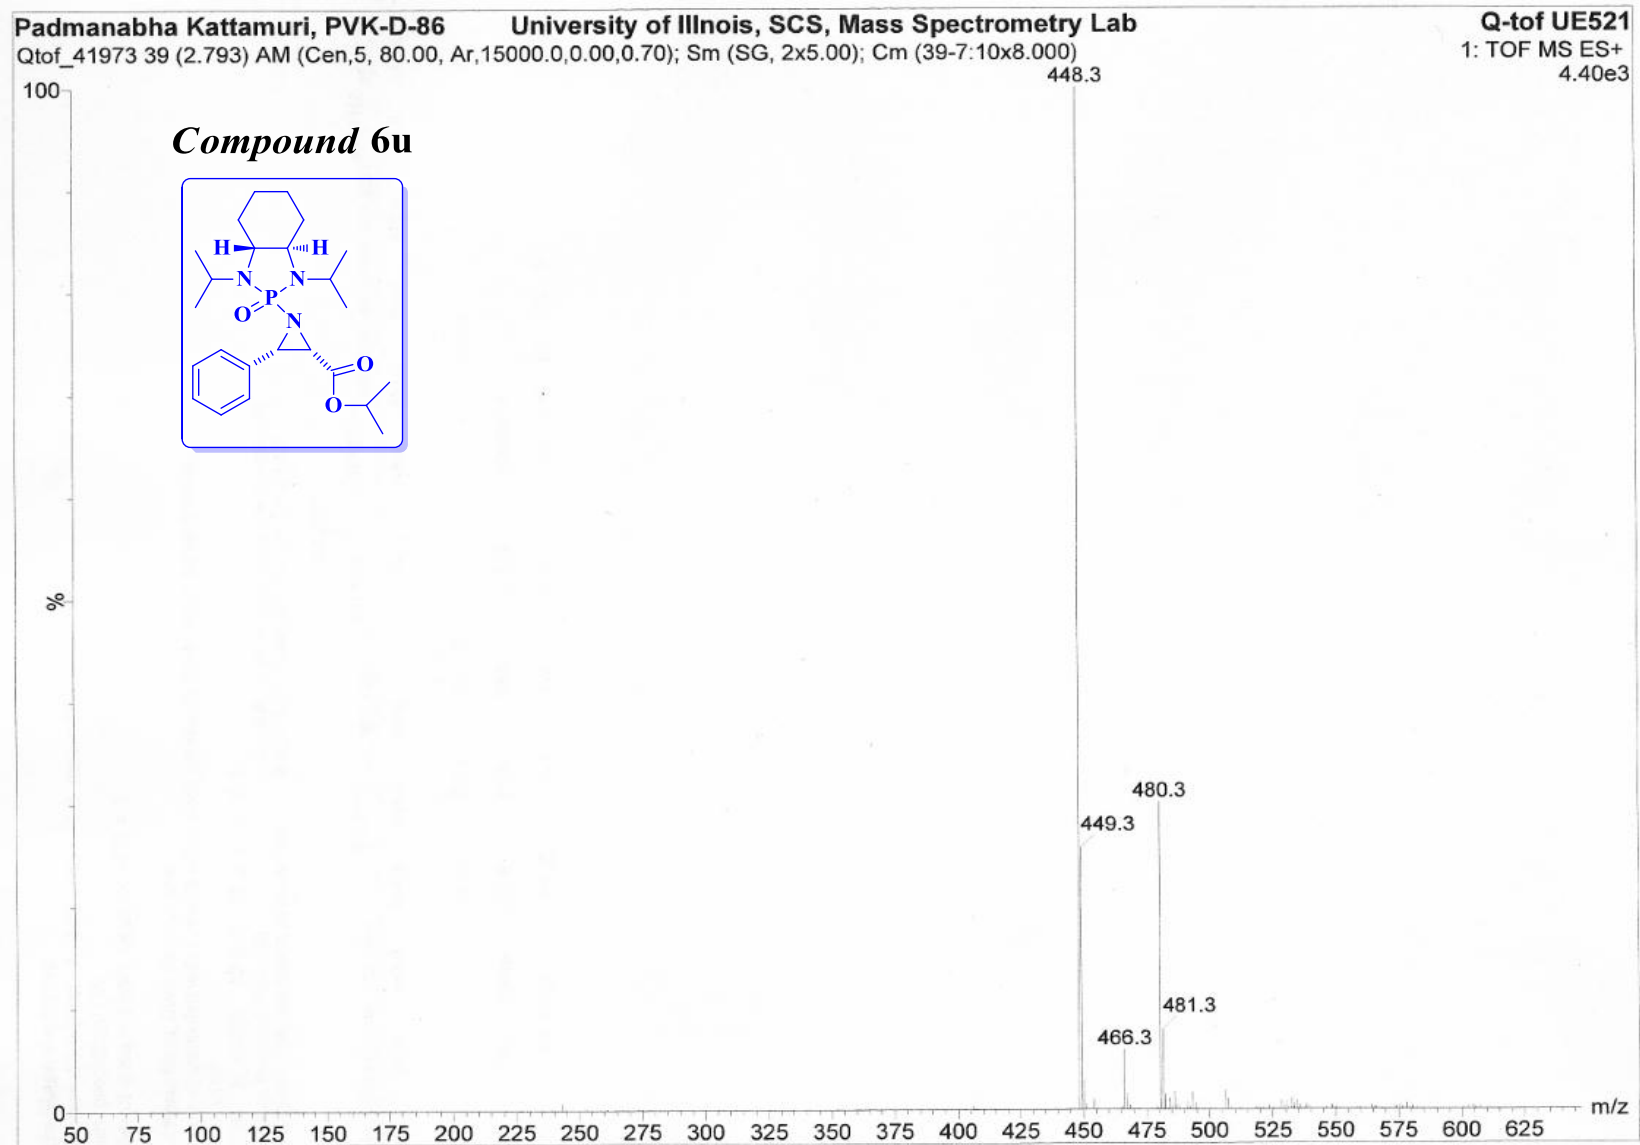

## Elemental Composition Report

Page 1

### Single Mass Analysis

Tolerance = 10.0 PPM / DBE: min = -1.5, max = 600.0

Element prediction: Off

Number of isotope peaks used for i-FIT = 3

Monoisotopic Mass, Even Electron Ions

94 formula(e) evaluated with 1 results within limits (all results (up to 1000) for each mass)

Elements Used:

C: 0-150 H: 0-250 N: 2-4 O: 2-4 P: 0-1

Padmanabha Kattamuri, PVK-D-86

University of Illinois, SCS, Mass Spectrometry Lab

Qtof\_41973 51 (3.650) AM (Cen,3, 80.00, Ar,15000.0,716.46,0.70,LS 3); Sm (SG, 2x3.00); Cm (51:52)

Q-tof UE521

1: TOF MS ES+

1.49e+003

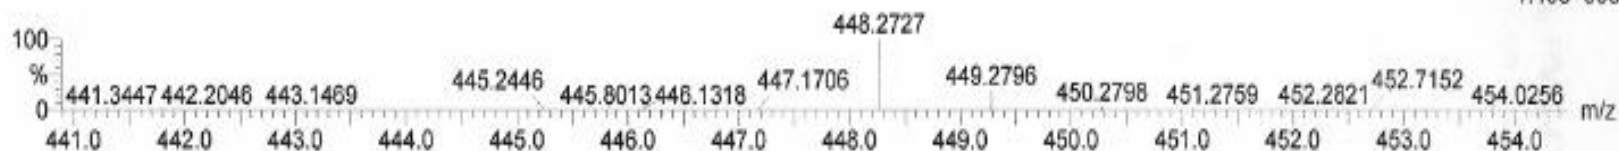

Minimum: -1.5  
Maximum: 5.0 10.0 600.0

| Mass     | Calc. Mass | mDa  | PPM  | DBE | i-FIT | Formula         |
|----------|------------|------|------|-----|-------|-----------------|
| 448.2727 | 448.2729   | -0.2 | -0.4 | 7.5 | 2.2   | C24 H39 N3 O3 P |

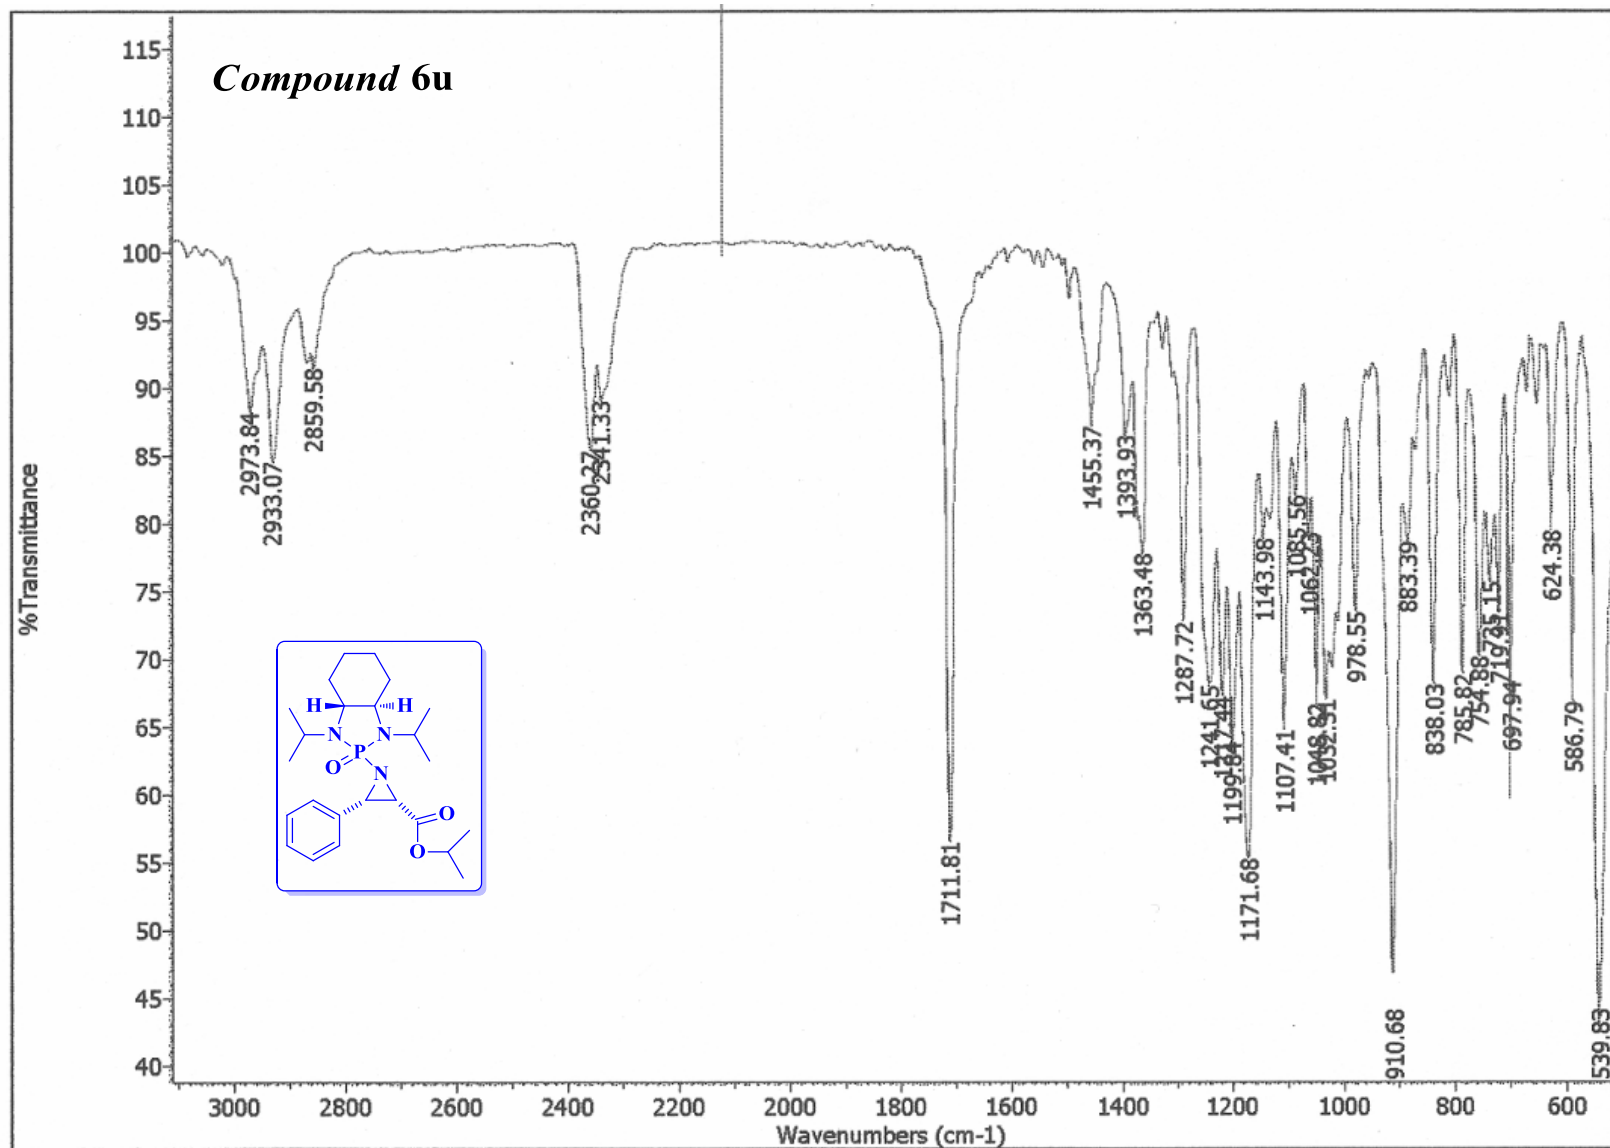

### Compound 6v

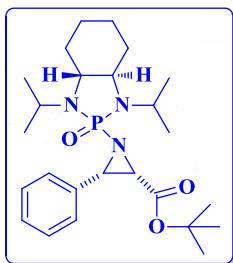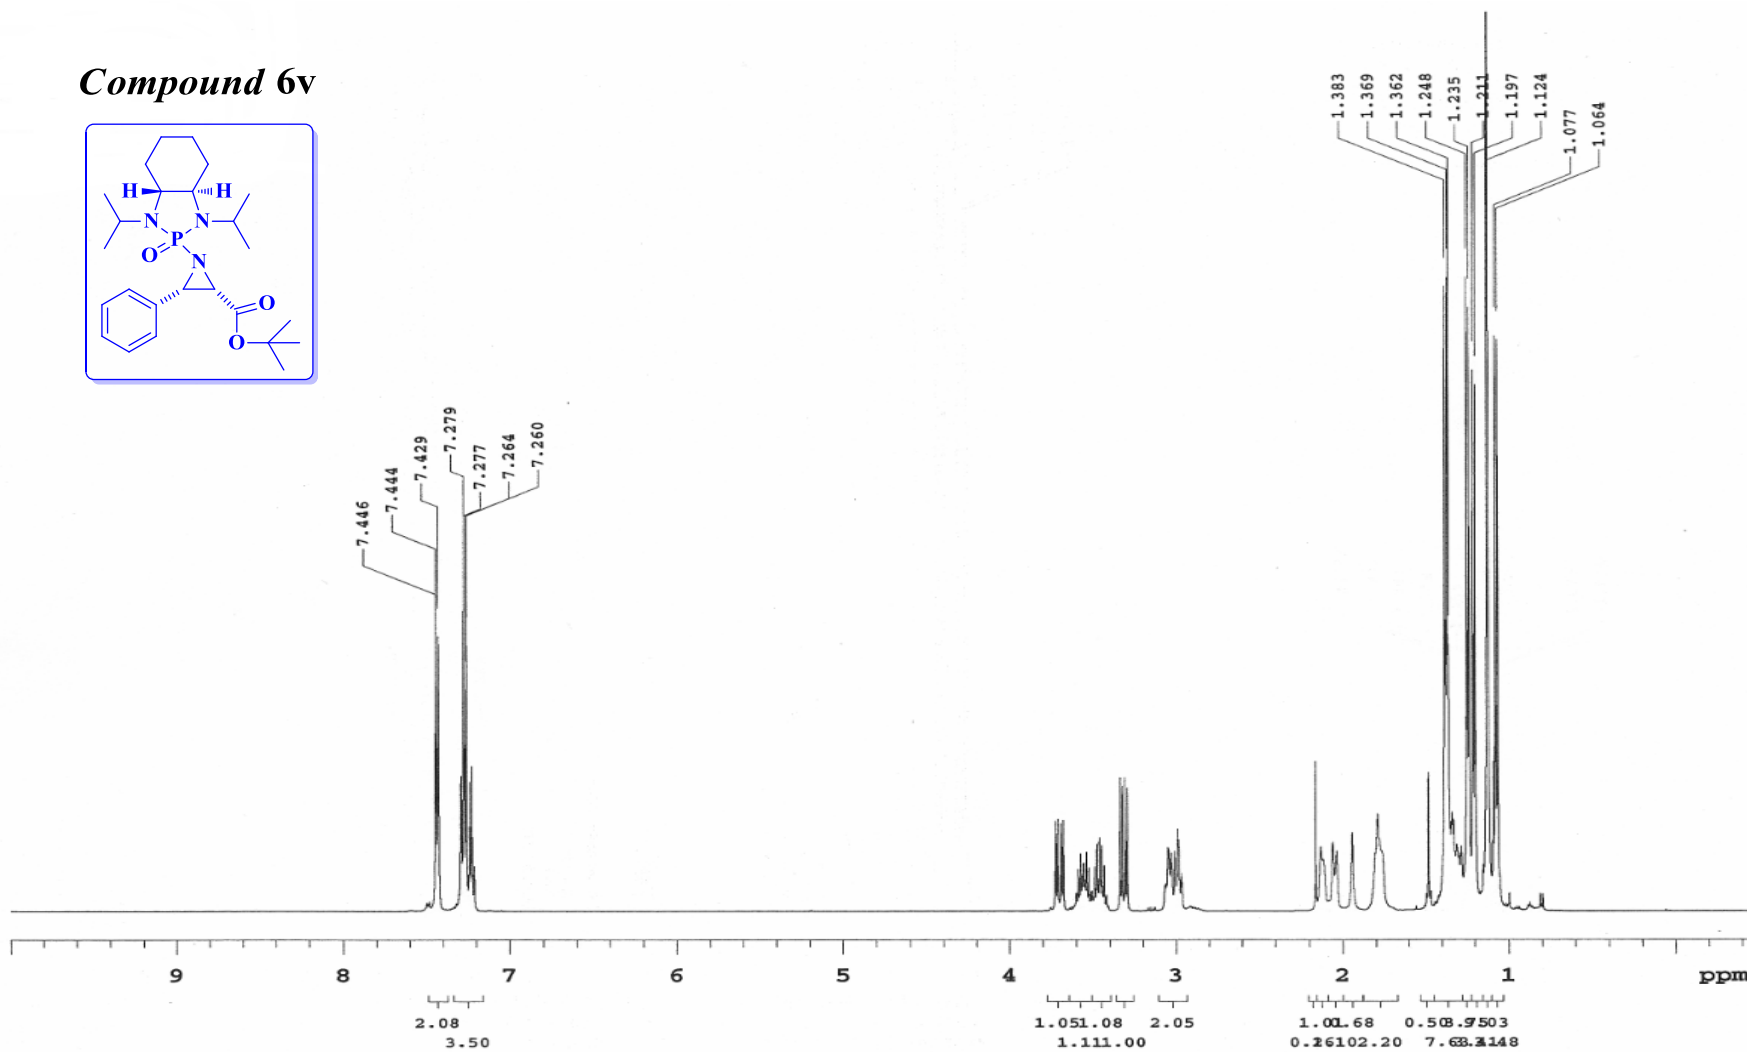

### Compound 6v

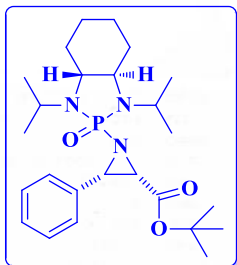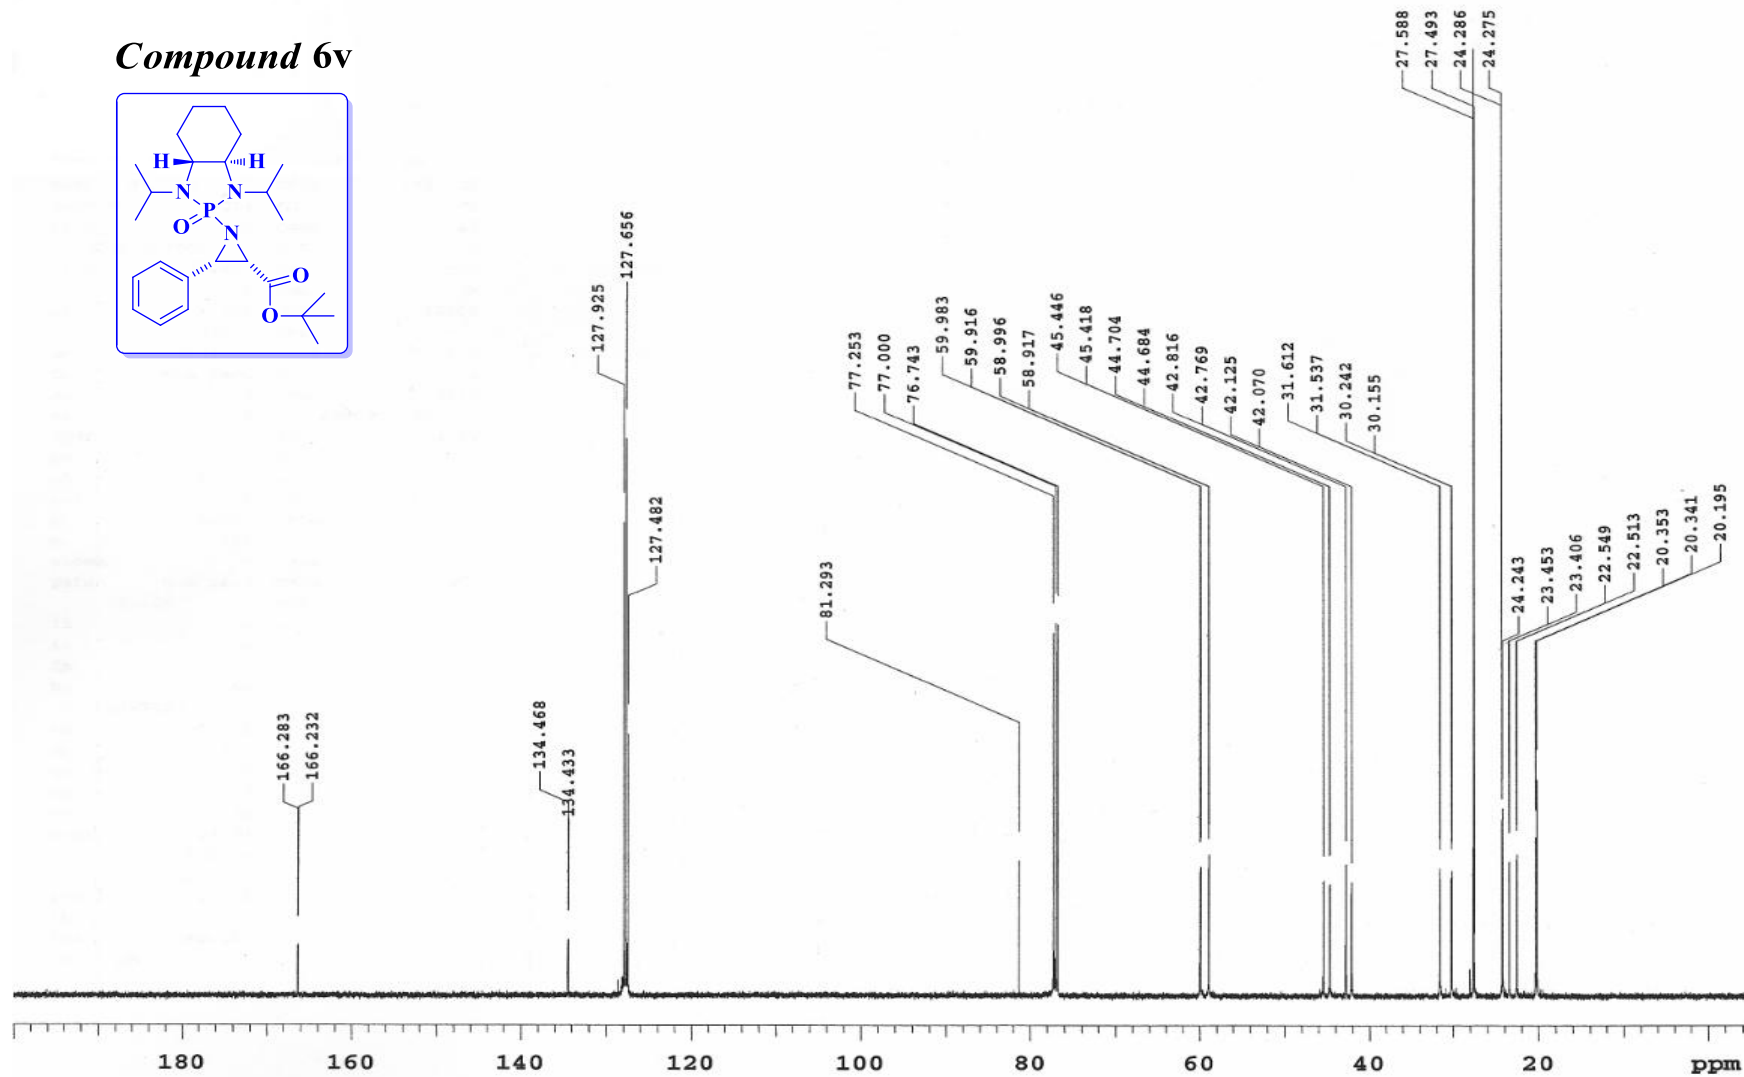

**Compound 6v**

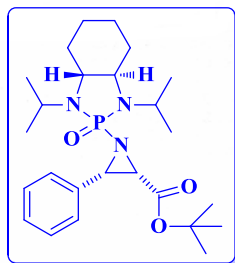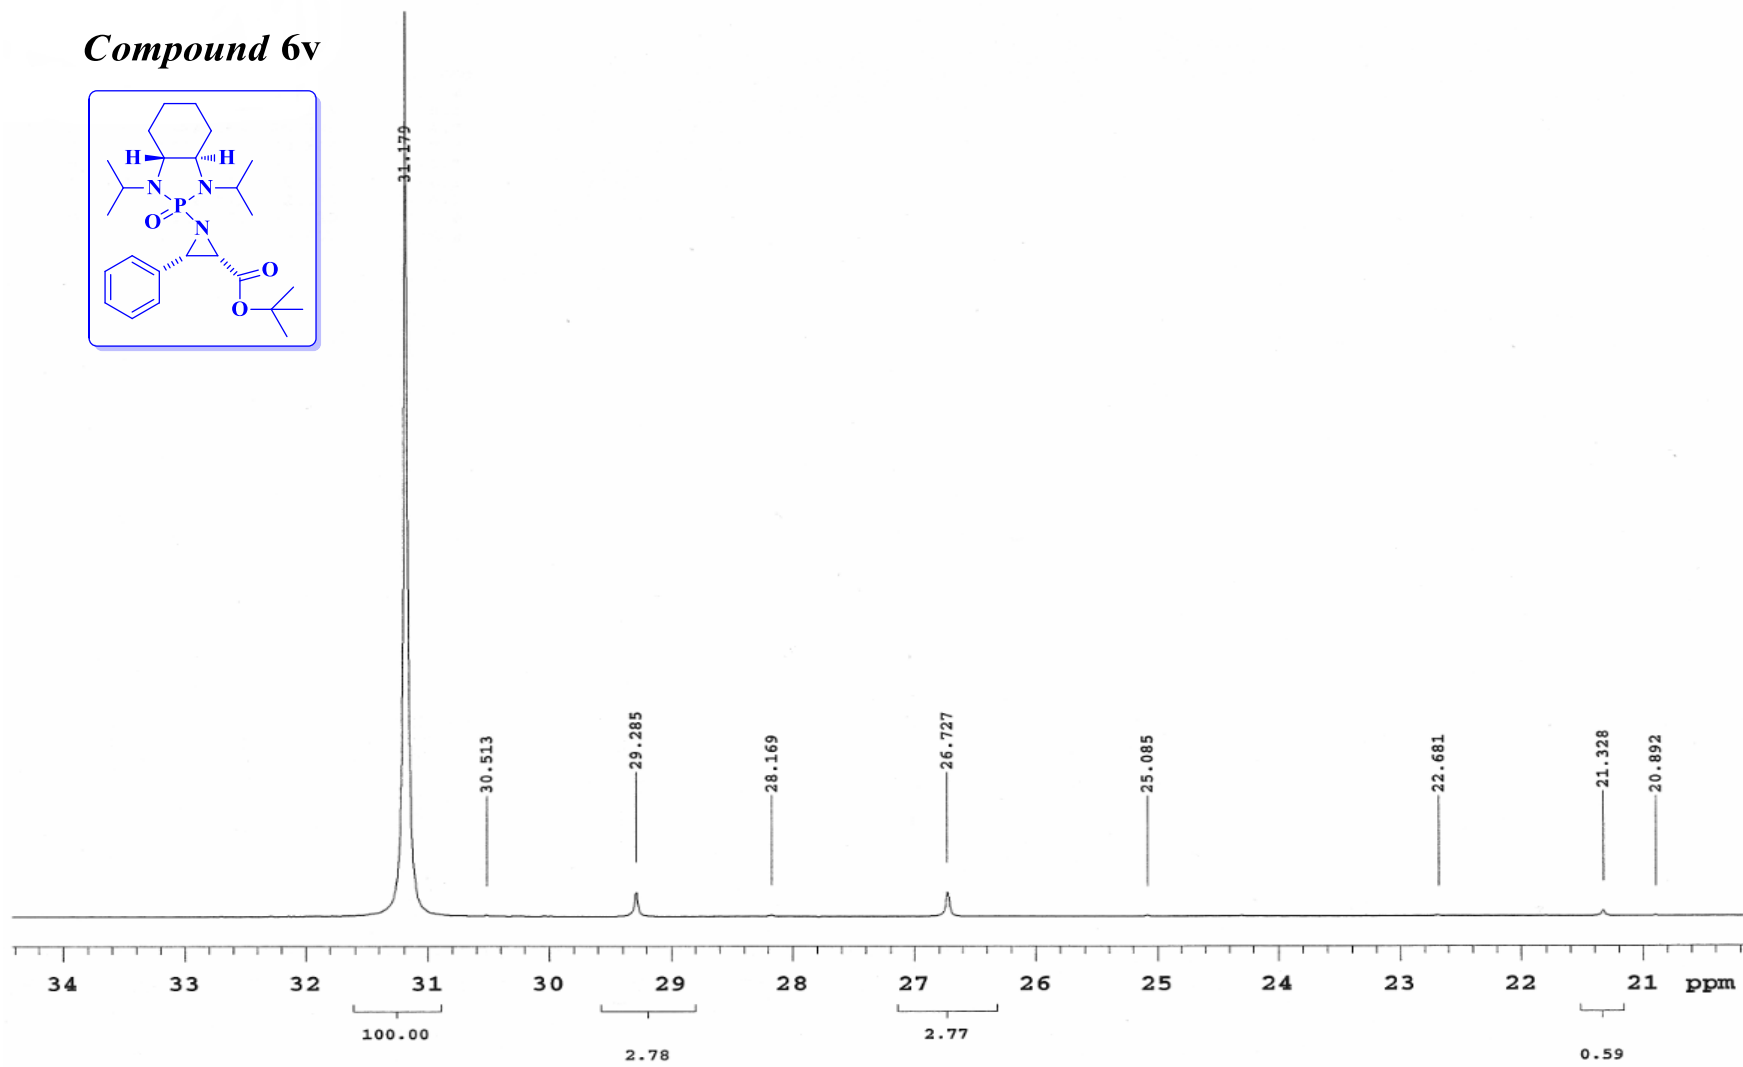



Padmanabha Kattamuri, PVK-D-102(A) University of Illinois, SCS, Mass Spectrometry Lab

Q-tof UE521

Qtof\_41958 42 (3.007) AM (Cen,5, 80.00, Ar,15000.0,0.00,0.70); Sm (SG, 2x5.00); Cm (42:43-9:12x8.000)

1: TOF MS ES+

4.22e4

**Compound 6v**

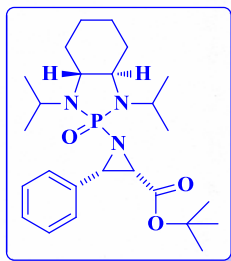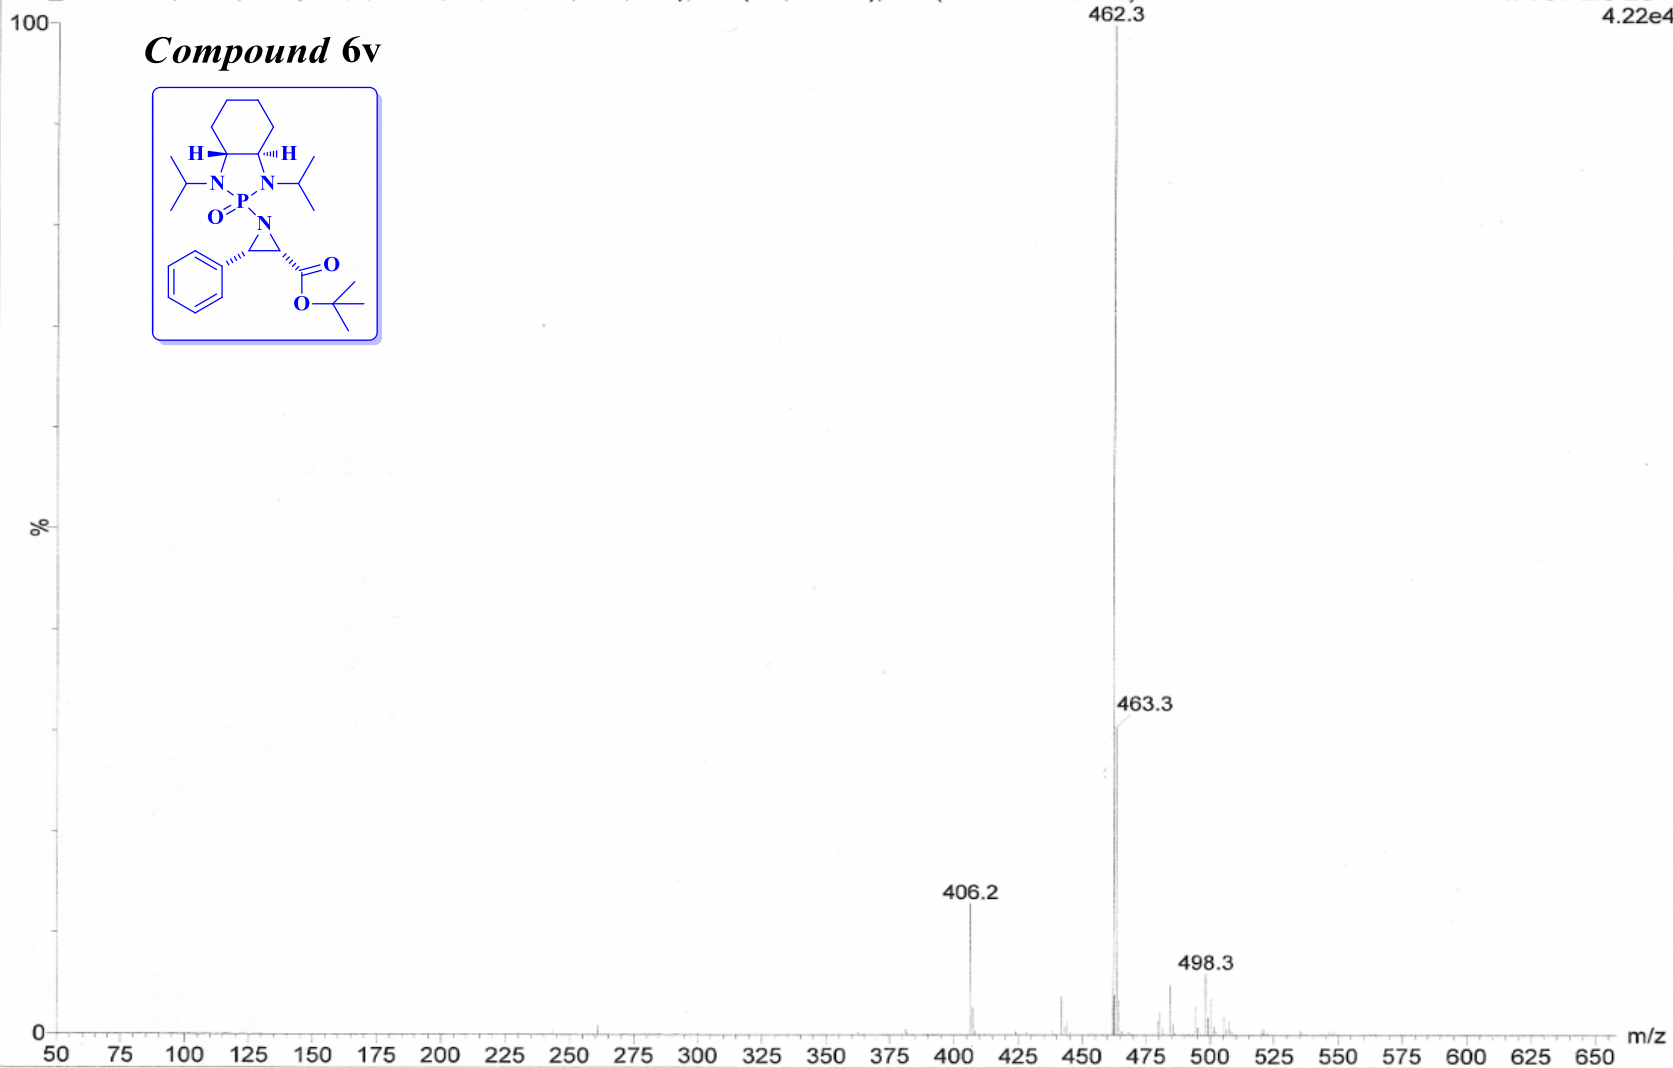

## Elemental Composition Report

Page 1

### Single Mass Analysis

Tolerance = 10.0 PPM / DBE: min = -1.5, max = 600.0

Element prediction: Off

Number of isotope peaks used for i-FIT = 3

Monoisotopic Mass, Even Electron Ions

97 formula(e) evaluated with 1 results within limits (all results (up to 1000) for each mass)

Elements Used:

C: 0-150 H: 0-250 N: 2-4 O: 2-4 P: 0-1

Padmanabha Kattamuri, PVK-D-102(A)

University of Illinois, SCS, Mass Spectrometry Lab

Qtof\_41958 39 (2.757) AM (Cen,3, 80.00, Ar,15000.0,716.46,0.70); Sm (SG, 2x3.00); Cm (39)

Q-tof UE521  
2: TOF MS ES+  
4.93e+002

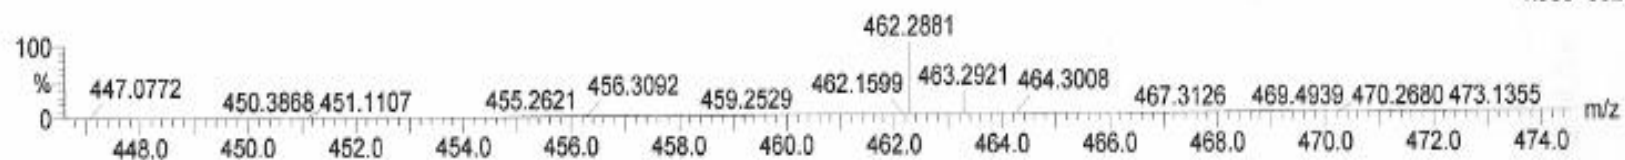

Minimum: -1.5  
Maximum: 5.0 10.0 600.0

| Mass     | Calc. Mass | mDa  | PPM  | DBE | i-FIT | Formula         |
|----------|------------|------|------|-----|-------|-----------------|
| 462.2881 | 462.2886   | -0.5 | -1.1 | 7.5 | 0.5   | C25 H41 N3 O3 P |

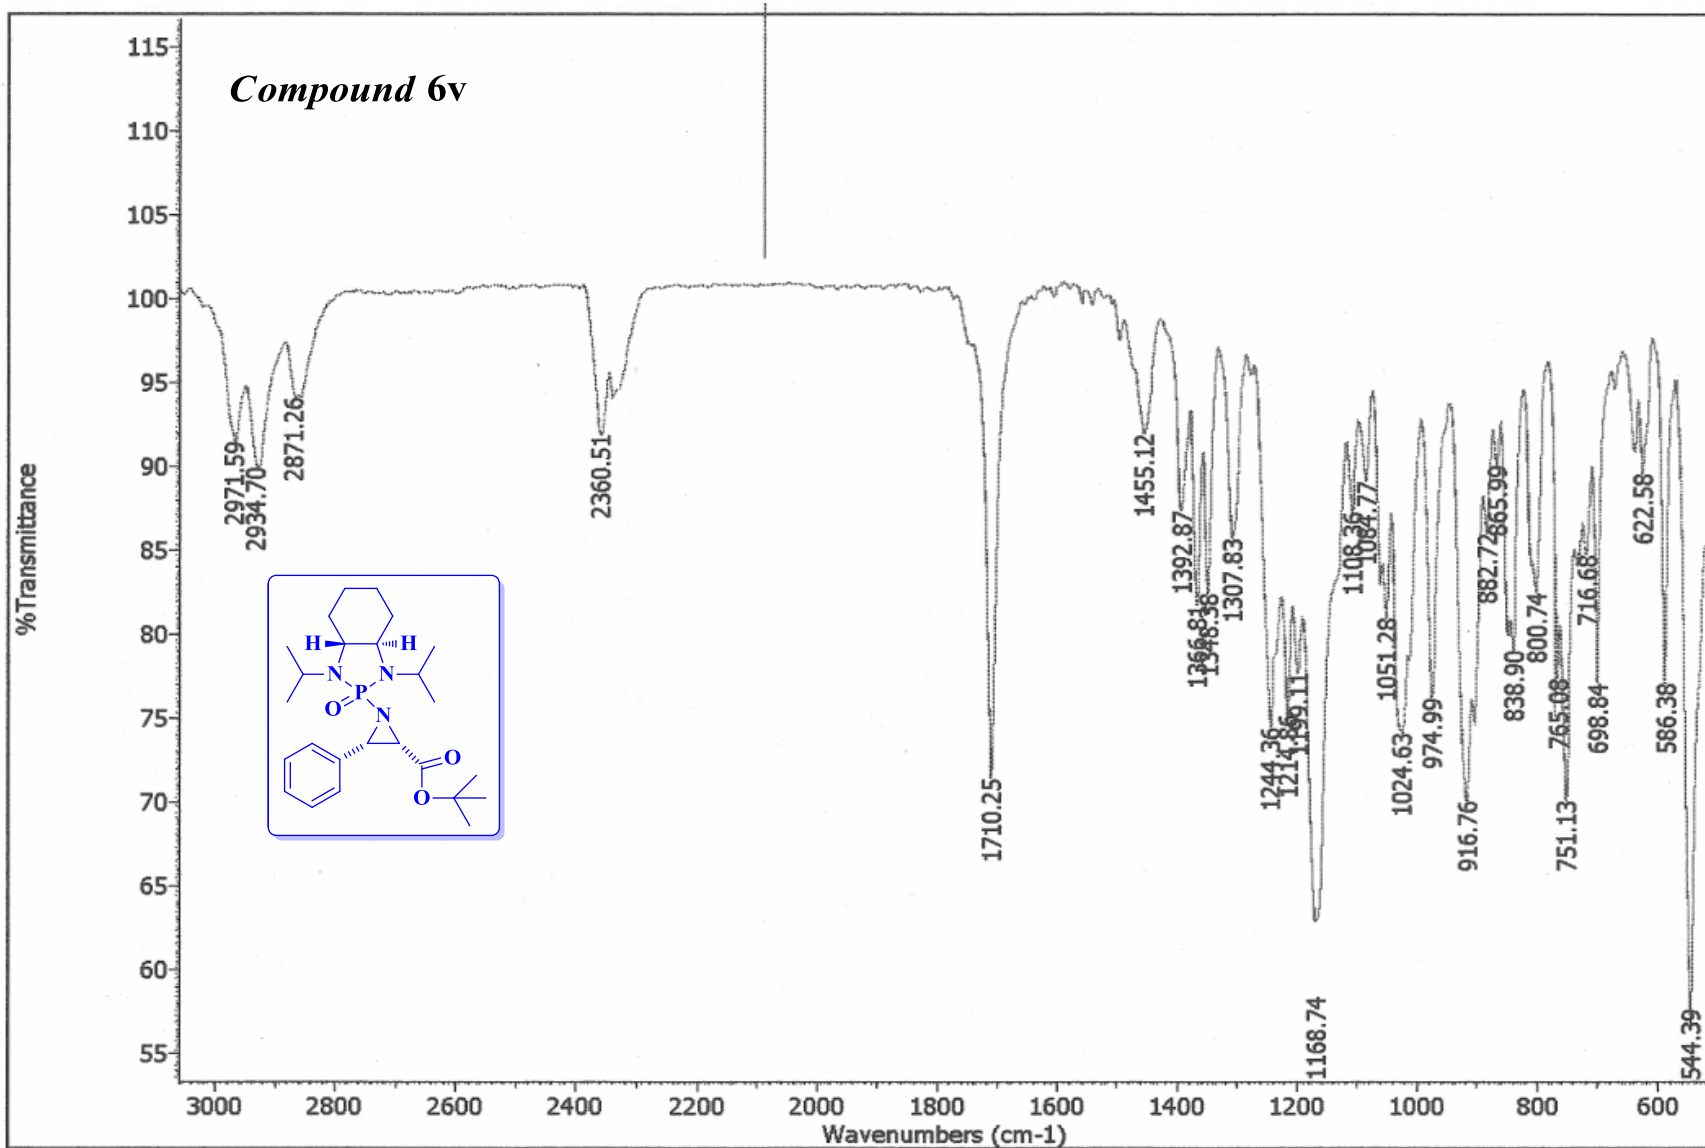

Supplement: c3ob40251g.pdf [file c3ob40251g.pdf]
